# Supplementary material
Source: publisher figshare collection journal article supplement (https://acs.figshare.com/ndownloader/files/7415812)
Supplement: Supplementary file 1 [file 7415812]

data_9092sadabs

_publ_requested_journal          'J.Am.Chem.Soc'

_publ_section_title              
;
 Enantioselective Synthesis of [6]Carbohelicenes 
;

loop_
_publ_author_name
_publ_author_address


      'Elisa Gonz\'alez-Fern\'andez'
;     Max-Planck-Institut f\"ur Kohlenforschung
      Kaiser-Wilhelm-Platz 1
      45470 M\"ulheim an der Ruhr
      Germany
;
      'Leo D. M. Nicholls'
;     Max-Planck-Institut f\"ur Kohlenforschung
      Kaiser-Wilhelm-Platz 1
      45470 M\"ulheim an der Ruhr
      Germany
;
      'Lukas Schaaf'
;     Max-Planck-Institut f\"ur Kohlenforschung
      Kaiser-Wilhelm-Platz 1
      45470 M\"ulheim an der Ruhr
      Germany
;
      'Christophe Far\`es'
;     Max-Planck-Institut f\"ur Kohlenforschung
      Kaiser-Wilhelm-Platz 1
      45470 M\"ulheim an der Ruhr
      Germany
;
      'Christian W. Lehmann'
;     Max-Planck-Institut f\"ur Kohlenforschung
      Kaiser-Wilhelm-Platz 1
      45470 M\"ulheim an der Ruhr
      Germany
;
      'Manuel Alcarazo '
;     Max-Planck-Institut f\"ur Kohlenforschung
      Kaiser-Wilhelm-Platz 1
      45470 M\"ulheim an der Ruhr
      Germany
;
_audit_block_code                GON-GC-340-01
_audit_creation_date             2015-01-07
_audit_creation_method           
;
Olex2 1.2
(compiled 2014.12.26 svn.r3119 for OlexSys, GUI svn.r4975)
;

_publ_contact_author_address     ?
_publ_contact_author_email       ?
_publ_contact_author_phone       ?
_publ_section_references         
;
Bourhis, L.J., Dolomanov, O.V., Gildea, R.J., Howard, J.A.K., Puschmann, H.
 (2015). Acta Cryst. A71, in press.

Dolomanov, O.V., Bourhis, L.J., Gildea, R.J, Howard, J.A.K. & Puschmann, H.
 (2009), J. Appl. Cryst. 42, 339-341.

Sheldrick, G.M. (2008). Acta Cryst. A64, 112-122.
;
_chemical_name_common            ?
_chemical_name_systematic        
;
 Title
;
_chemical_formula_moiety         'C28 H20'
_chemical_formula_sum            'C28 H20'
_chemical_formula_weight         356.44
_chemical_compound_source        toluole
_chemical_melting_point          ?
loop_
_atom_type_symbol
_atom_type_description
_atom_type_scat_dispersion_real
_atom_type_scat_dispersion_imag
_atom_type_scat_source
C C 0.0033 0.0016 'International Tables Vol C Tables 4.2.6.8 and 6.1.1.4'
H H 0.0000 0.0000 'International Tables Vol C Tables 4.2.6.8 and 6.1.1.4'

_shelx_space_group_comment       
;
The symmetry employed for this shelxl refinement is uniquely defined
by the following loop, which should always be used as a source of
symmetry information in preference to the above space-group names.
They are only intended as comments.
;
_space_group_crystal_system      monoclinic
_space_group_IT_number           14
_space_group_name_H-M_alt        'P 1 21/c 1'
_space_group_name_Hall           '-P 2ybc'

_symmetry_cell_setting           MONOCLINIC
_symmetry_space_group_name_H-M   P21/c
_symmetry_space_group_name_Hall  '-p 2ybc'
_symmetry_Int_Tables_number      14

loop_
_space_group_symop_operation_xyz
'x, y, z'
'-x, y+1/2, -z+1/2'
'-x, -y, -z'
'x, -y-1/2, z-1/2'

_cell_length_a                   8.5356(11)
_cell_length_b                   15.5623(19)
_cell_length_c                   13.6640(17)
_cell_angle_alpha                90
_cell_angle_beta                 98.380(3)
_cell_angle_gamma                90
_cell_volume                     1795.7(4)
_cell_formula_units_Z            4
_cell_measurement_reflns_used    7366


_cell_measurement_temperature    100
_cell_measurement_theta_max      30.5062
_cell_measurement_theta_min      2.4119
_shelx_estimated_absorpt_T_max   0.999
_shelx_estimated_absorpt_T_min   0.983
_exptl_absorpt_coefficient_mu    0.075
_exptl_absorpt_correction_T_max  0.99859
_exptl_absorpt_correction_T_min  0.98871

_exptl_absorpt_correction_type   gaussian
_exptl_absorpt_process_details   'SADABS (Bruker AXS, 2012)'
_exptl_crystal_colour            colourless
_exptl_crystal_density_diffrn    1.318
_exptl_crystal_density_meas      ?
_exptl_crystal_density_method    ?

loop_
_exptl_crystal_face_index_h
_exptl_crystal_face_index_k
_exptl_crystal_face_index_l
_exptl_crystal_face_perp_dist
0.00 1.00 0.00 0.0400
0.00 -1.00 0.00 0.0800
0.00 0.00 -1.00 0.1100
0.00 0.00 1.00 0.0600
1.00 0.00 0.00 0.0100
-1.00 0.00 0.00 0.0100

_exptl_crystal_description       plate
_exptl_crystal_F_000             752
_exptl_crystal_size_max          0.17
_exptl_crystal_size_mid          0.12
_exptl_crystal_size_min          0.02
_exptl_special_details           
;
 Crystal mounted on a MiTeGen loop using Perfluoropolyether PFO-XR75
;
_exptl_transmission_factor_max   ?
_exptl_transmission_factor_min   ?
_diffrn_reflns_av_R_equivalents  0.0658
_diffrn_reflns_av_unetI/netI     0.0356
_diffrn_reflns_Laue_measured_fraction_full 0.999
_diffrn_reflns_Laue_measured_fraction_max 0.995
_diffrn_reflns_limit_h_max       12
_diffrn_reflns_limit_h_min       -12
_diffrn_reflns_limit_k_max       22
_diffrn_reflns_limit_k_min       -22
_diffrn_reflns_limit_l_max       18
_diffrn_reflns_limit_l_min       -19
_diffrn_reflns_number            51392
_diffrn_reflns_point_group_measured_fraction_full 0.999
_diffrn_reflns_point_group_measured_fraction_max 0.995
_diffrn_reflns_theta_full        25.242
_diffrn_reflns_theta_max         30.675
_diffrn_reflns_theta_min         2.957
_diffrn_radiation_monochromator  'Incoatec Helios mirrors'
_diffrn_ambient_temperature      100
_diffrn_detector_area_resol_mean 66.67
_diffrn_measured_fraction_theta_full 0.999
_diffrn_measured_fraction_theta_max 0.995
_diffrn_measurement_device_type  'Bruker-AXS Kappa Mach3 APEX-II'
_diffrn_measurement_method       'CCD \f- and \w-scans'
_diffrn_radiation_type           Mo-K\a
_diffrn_radiation_wavelength     0.71073
_diffrn_source                   1\mS
_diffrn_standards_number         0
_reflns_Friedel_coverage         0.000
_reflns_Friedel_fraction_full    .
_reflns_Friedel_fraction_max     .
_reflns_number_gt                4161
_reflns_number_total             5540
_reflns_special_details          
;
 Reflections were merged by SHELXL according to the crystal
 class for the calculation of statistics and refinement.
 
 _reflns_Friedel_fraction is defined as the number of unique
 Friedel pairs measured divided by the number that would be
 possible theoretically, ignoring centric projections and
 systematic absences.
;
_reflns_threshold_expression     'I > 2\s(I)'
_computing_cell_refinement       'SAINT software (Bruker AXS, 2004)'

_computing_data_collection       'APEX2 (Bruker AXS, 2005-2013)'
_computing_data_reduction        'SAINT software (Bruker AXS, 2004)'
_computing_molecular_graphics    'DIAMOND (Crystal Impact GbR, 1997-2012)'
_computing_publication_material  'Olex2 (Dolomanov et al., 2009)'
_computing_structure_refinement  'SHELXL (G. M. Sheldrick, 2013)'
_computing_structure_solution    'SHELXS (G. M. Sheldrick, 2013)'
_refine_diff_density_max         0.402
_refine_diff_density_min         -0.218
_refine_diff_density_rms         0.054
_refine_ls_extinction_coef       .
_refine_ls_extinction_method     none
_refine_ls_goodness_of_fit_ref   1.025
_refine_ls_hydrogen_treatment    constr
_refine_ls_matrix_type           full
_refine_ls_number_parameters     255
_refine_ls_number_reflns         5540
_refine_ls_number_restraints     0
_refine_ls_R_factor_all          0.0700
_refine_ls_R_factor_gt           0.0471
_refine_ls_restrained_S_all      1.025
_refine_ls_shift/su_max          0.000
_refine_ls_shift/su_mean         0.000
_refine_ls_structure_factor_coef Fsqd
_refine_ls_weighting_details     
'w=1/[\s^2^(Fo^2^)+(0.0648P)^2^+0.6444P] where P=(Fo^2^+2Fc^2^)/3'
_refine_ls_weighting_scheme      calc
_refine_ls_wR_factor_gt          0.1181
_refine_ls_wR_factor_ref         0.1320

_refine_special_details          
;
 Refinement of F^2^ against ALL reflections.  The weighted R-factor wR and
 goodness of fit S are based on F^2^, conventional R-factors R are based
 on F, with F set to zero for negative F^2^. The threshold expression of
 F^2^ > 2sigma(F^2^) is used only for calculating R-factors(gt) etc. and is
 not relevant to the choice of reflections for refinement.  R-factors based
 on F^2^ are statistically about twice as large as those based on F, and R-
 factors based on ALL data will be even larger.

 The minimum and maximum estimated transmissions from the multi-scan
 scaling are 0.9326 and 1.0000 (SADABS).

Highest peak        ?
Deepest hole        ?
;
_olex2_refinement_description    
;
1. Fixed Uiso
 At 1.2 times of:
  All C(H) groups
 At 1.5 times of:
  All C(H,H,H) groups
2.a Aromatic/amide H refined with riding coordinates:
 C2(H2), C4(H4), C5(H5), C7(H7), C8(H8), C10(H10), C13(H13), C14(H14),
 C15(H15), C16(H16), C22(H22), C23(H23), C24(H24), C25(H25)
2.b Idealised Me refined as rotating group:
 C27(H27A,H27B,H27C), C28(H28A,H28B,H28C)
;
_atom_sites_solution_hydrogens   geom

_atom_sites_solution_primary     direct
_atom_sites_solution_secondary   difmap
loop_
_atom_site_label
_atom_site_type_symbol
_atom_site_fract_x
_atom_site_fract_y
_atom_site_fract_z
_atom_site_U_iso_or_equiv
_atom_site_adp_type
_atom_site_occupancy
_atom_site_site_symmetry_order
_atom_site_calc_flag
_atom_site_refinement_flags_posn
_atom_site_refinement_flags_adp
_atom_site_refinement_flags_occupancy
_atom_site_disorder_assembly
_atom_site_disorder_group
C1 C 0.76779(14) 0.55788(9) 0.82948(10) 0.0196(3) Uani 1 1 d . . . . .
C2 C 0.77717(15) 0.49061(9) 0.89293(10) 0.0204(3) Uani 1 1 d . . . . .
H2 H 0.8777 0.4761 0.9285 0.025 Uiso 1 1 calc R . . . .
C3 C 0.64288(15) 0.44046(8) 0.90882(9) 0.0174(2) Uani 1 1 d . . . . .
C4 C 0.65566(16) 0.37991(8) 0.98761(9) 0.0214(3) Uani 1 1 d . . . . .
H4 H 0.7565 0.3674 1.0242 0.026 Uiso 1 1 calc R . . . .
C5 C 0.52459(17) 0.33993(8) 1.01080(9) 0.0213(3) Uani 1 1 d . . . . .
H5 H 0.5313 0.3069 1.0698 0.026 Uiso 1 1 calc R . . . .
C6 C 0.37703(15) 0.34705(8) 0.94742(9) 0.0175(2) Uani 1 1 d . . . . .
C7 C 0.24008(17) 0.30586(8) 0.97278(10) 0.0210(3) Uani 1 1 d . . . . .
H7 H 0.2467 0.2747 1.0330 0.025 Uiso 1 1 calc R . . . .
C8 C 0.10012(16) 0.31064(8) 0.91193(10) 0.0215(3) Uani 1 1 d . . . . .
H8 H 0.0059 0.2912 0.9342 0.026 Uiso 1 1 calc R . . . .
C9 C 0.09357(15) 0.34471(7) 0.81457(10) 0.0173(2) Uani 1 1 d . . . . .
C10 C -0.05011(15) 0.33939(8) 0.74652(11) 0.0201(3) Uani 1 1 d . . . . .
H10 H -0.1431 0.3198 0.7702 0.024 Uiso 1 1 calc R . . . .
C11 C -0.05955(14) 0.36107(8) 0.64984(10) 0.0188(3) Uani 1 1 d . . . . .
C12 C 0.08357(14) 0.38553(7) 0.61229(9) 0.0155(2) Uani 1 1 d . . . . .
C13 C 0.08326(15) 0.40162(8) 0.51036(10) 0.0186(2) Uani 1 1 d . . . . .
H13 H -0.0146 0.4026 0.4672 0.022 Uiso 1 1 calc R . . . .
C14 C 0.22097(16) 0.41584(8) 0.47259(10) 0.0193(3) Uani 1 1 d . . . . .
H14 H 0.2179 0.4283 0.4043 0.023 Uiso 1 1 calc R . . . .
C15 C 0.36666(15) 0.41193(8) 0.53506(9) 0.0170(2) Uani 1 1 d . . . . .
H15 H 0.4629 0.4173 0.5083 0.020 Uiso 1 1 calc R . . . .
C16 C 0.36991(14) 0.40035(7) 0.63526(9) 0.0144(2) Uani 1 1 d . . . . .
H16 H 0.4692 0.3989 0.6769 0.017 Uiso 1 1 calc R . . . .
C17 C 0.22964(13) 0.39060(7) 0.67785(9) 0.0133(2) Uani 1 1 d . . . . .
C18 C 0.23092(14) 0.37938(7) 0.78373(9) 0.0138(2) Uani 1 1 d . . . . .
C19 C 0.36784(14) 0.39468(7) 0.85787(9) 0.0141(2) Uani 1 1 d . . . . .
C20 C 0.49531(14) 0.45426(7) 0.84936(8) 0.0136(2) Uani 1 1 d . . . . .
C21 C 0.47755(13) 0.53354(7) 0.79254(8) 0.0132(2) Uani 1 1 d . . . . .
C22 C 0.32674(14) 0.56768(7) 0.75648(9) 0.0141(2) Uani 1 1 d . . . . .
H22 H 0.2349 0.5357 0.7651 0.017 Uiso 1 1 calc R . . . .
C23 C 0.30918(15) 0.64583(8) 0.70929(9) 0.0175(2) Uani 1 1 d . . . . .
H23 H 0.2062 0.6674 0.6865 0.021 Uiso 1 1 calc R . . . .
C24 C 0.44327(16) 0.69375(8) 0.69475(10) 0.0206(3) Uani 1 1 d . . . . .
H24 H 0.4313 0.7469 0.6603 0.025 Uiso 1 1 calc R . . . .
C25 C 0.59161(15) 0.66351(8) 0.73055(10) 0.0198(3) Uani 1 1 d . . . . .
H25 H 0.6818 0.6963 0.7206 0.024 Uiso 1 1 calc R . . . .
C26 C 0.61288(14) 0.58448(8) 0.78198(9) 0.0158(2) Uani 1 1 d . . . . .
C27 C 0.91409(16) 0.60771(11) 0.81524(11) 0.0284(3) Uani 1 1 d . . . . .
H27A H 0.9246 0.6089 0.7448 0.043 Uiso 1 1 calc GR . . . .
H27B H 1.0074 0.5800 0.8524 0.043 Uiso 1 1 calc GR . . . .
H27C H 0.9054 0.6666 0.8392 0.043 Uiso 1 1 calc GR . . . .
C28 C -0.21364(15) 0.35335(9) 0.58117(12) 0.0271(3) Uani 1 1 d . . . . .
H28A H -0.2422 0.4093 0.5508 0.041 Uiso 1 1 calc GR . . . .
H28B H -0.2970 0.3344 0.6186 0.041 Uiso 1 1 calc GR . . . .
H28C H -0.2021 0.3113 0.5293 0.041 Uiso 1 1 calc GR . . . .

loop_
_atom_site_aniso_label
_atom_site_aniso_U_11
_atom_site_aniso_U_22
_atom_site_aniso_U_33
_atom_site_aniso_U_23
_atom_site_aniso_U_13
_atom_site_aniso_U_12
C1 0.0127(5) 0.0288(7) 0.0176(6) -0.0092(5) 0.0032(4) -0.0024(5)
C2 0.0135(5) 0.0278(6) 0.0188(6) -0.0089(5) -0.0016(4) 0.0025(5)
C3 0.0179(6) 0.0188(5) 0.0147(6) -0.0053(4) -0.0003(4) 0.0042(4)
C4 0.0262(7) 0.0213(6) 0.0144(6) -0.0039(5) -0.0043(5) 0.0084(5)
C5 0.0340(7) 0.0173(6) 0.0120(6) -0.0008(4) 0.0012(5) 0.0080(5)
C6 0.0259(6) 0.0131(5) 0.0141(6) -0.0014(4) 0.0053(5) 0.0042(4)
C7 0.0335(7) 0.0142(5) 0.0176(6) 0.0009(4) 0.0111(5) 0.0025(5)
C8 0.0274(7) 0.0139(5) 0.0261(7) 0.0008(5) 0.0140(5) -0.0014(5)
C9 0.0186(6) 0.0122(5) 0.0227(6) -0.0011(4) 0.0083(5) 0.0008(4)
C10 0.0152(6) 0.0146(5) 0.0324(7) -0.0018(5) 0.0097(5) -0.0027(4)
C11 0.0129(5) 0.0140(5) 0.0293(7) -0.0036(5) 0.0021(5) 0.0001(4)
C12 0.0127(5) 0.0120(5) 0.0217(6) -0.0029(4) 0.0018(4) 0.0006(4)
C13 0.0170(6) 0.0163(5) 0.0207(6) -0.0032(4) -0.0040(5) 0.0012(4)
C14 0.0234(6) 0.0192(6) 0.0145(6) -0.0020(4) 0.0005(5) 0.0009(5)
C15 0.0176(6) 0.0179(5) 0.0160(6) -0.0027(4) 0.0040(5) -0.0012(4)
C16 0.0123(5) 0.0157(5) 0.0150(5) -0.0025(4) 0.0011(4) -0.0007(4)
C17 0.0126(5) 0.0109(5) 0.0162(5) -0.0012(4) 0.0018(4) 0.0007(4)
C18 0.0142(5) 0.0109(5) 0.0169(6) -0.0004(4) 0.0044(4) 0.0012(4)
C19 0.0165(5) 0.0121(5) 0.0143(5) -0.0012(4) 0.0047(4) 0.0029(4)
C20 0.0146(5) 0.0153(5) 0.0113(5) -0.0024(4) 0.0029(4) 0.0029(4)
C21 0.0140(5) 0.0153(5) 0.0109(5) -0.0028(4) 0.0033(4) -0.0011(4)
C22 0.0136(5) 0.0150(5) 0.0139(5) -0.0019(4) 0.0031(4) -0.0009(4)
C23 0.0180(6) 0.0170(5) 0.0169(6) 0.0008(4) 0.0011(5) 0.0003(4)
C24 0.0259(7) 0.0175(6) 0.0190(6) 0.0029(4) 0.0057(5) -0.0038(5)
C25 0.0199(6) 0.0225(6) 0.0184(6) -0.0018(5) 0.0074(5) -0.0073(5)
C26 0.0147(5) 0.0199(6) 0.0135(5) -0.0048(4) 0.0045(4) -0.0029(4)
C27 0.0162(6) 0.0463(9) 0.0233(7) -0.0090(6) 0.0053(5) -0.0089(6)
C28 0.0144(6) 0.0243(7) 0.0410(9) -0.0027(6) -0.0016(6) -0.0024(5)

_geom_special_details            
;
 All esds (except the esd in the dihedral angle between two l.s. planes)
 are estimated using the full covariance matrix.  The cell esds are taken
 into account individually in the estimation of esds in distances, angles
 and torsion angles; correlations between esds in cell parameters are only
 used when they are defined by crystal symmetry.  An approximate (isotropic)
 treatment of cell esds is used for estimating esds involving l.s. planes.
;
loop_
_geom_bond_atom_site_label_1
_geom_bond_atom_site_label_2
_geom_bond_distance
_geom_bond_site_symmetry_2
_geom_bond_publ_flag
C1 C2 1.354(2) . ?
C1 C26 1.4459(17) . ?
C1 C27 1.5064(19) . ?
C2 C3 1.4293(19) . ?
C3 C4 1.4229(18) . ?
C3 C20 1.4123(16) . ?
C4 C5 1.357(2) . ?
C5 C6 1.4250(18) . ?
C6 C7 1.4196(19) . ?
C6 C19 1.4230(17) . ?
C7 C8 1.354(2) . ?
C8 C9 1.4256(18) . ?
C9 C10 1.4294(18) . ?
C9 C18 1.4096(17) . ?
C10 C11 1.354(2) . ?
C11 C12 1.4433(17) . ?
C11 C28 1.5050(18) . ?
C12 C13 1.4148(18) . ?
C12 C17 1.4274(16) . ?
C13 C14 1.3688(19) . ?
C14 C15 1.4033(17) . ?
C15 C16 1.3772(17) . ?
C16 C17 1.4136(16) . ?
C17 C18 1.4557(17) . ?
C18 C19 1.4505(16) . ?
C19 C20 1.4469(16) . ?
C20 C21 1.4540(16) . ?
C21 C22 1.4132(16) . ?
C21 C26 1.4255(16) . ?
C22 C23 1.3745(17) . ?
C23 C24 1.4041(17) . ?
C24 C25 1.3724(19) . ?
C25 C26 1.4150(18) . ?

loop_
_geom_angle_atom_site_label_1
_geom_angle_atom_site_label_2
_geom_angle_atom_site_label_3
_geom_angle
_geom_angle_site_symmetry_1
_geom_angle_site_symmetry_3
_geom_angle_publ_flag
C2 C1 C26 118.26(12) . . ?
C2 C1 C27 120.52(12) . . ?
C26 C1 C27 121.05(13) . . ?
C1 C2 C3 123.06(11) . . ?
C4 C3 C2 120.12(11) . . ?
C20 C3 C2 119.82(12) . . ?
C20 C3 C4 119.97(12) . . ?
C5 C4 C3 120.35(12) . . ?
C4 C5 C6 120.54(12) . . ?
C7 C6 C5 120.19(12) . . ?
C7 C6 C19 120.06(12) . . ?
C19 C6 C5 119.74(12) . . ?
C8 C7 C6 120.62(12) . . ?
C7 C8 C9 120.29(12) . . ?
C8 C9 C10 119.91(12) . . ?
C18 C9 C8 120.01(12) . . ?
C18 C9 C10 119.99(12) . . ?
C11 C10 C9 122.92(12) . . ?
C10 C11 C12 118.63(11) . . ?
C10 C11 C28 120.71(12) . . ?
C12 C11 C28 120.50(12) . . ?
C13 C12 C11 121.09(11) . . ?
C13 C12 C17 118.95(11) . . ?
C17 C12 C11 119.91(12) . . ?
C14 C13 C12 121.42(11) . . ?
C13 C14 C15 119.81(12) . . ?
C16 C15 C14 119.87(12) . . ?
C15 C16 C17 121.85(11) . . ?
C12 C17 C18 119.76(11) . . ?
C16 C17 C12 117.54(11) . . ?
C16 C17 C18 122.54(10) . . ?
C9 C18 C17 117.19(11) . . ?
C9 C18 C19 118.33(11) . . ?
C19 C18 C17 124.27(11) . . ?
C6 C19 C18 116.93(11) . . ?
C6 C19 C20 117.07(11) . . ?
C20 C19 C18 126.00(10) . . ?
C3 C20 C19 118.32(11) . . ?
C3 C20 C21 116.81(11) . . ?
C19 C20 C21 124.44(10) . . ?
C22 C21 C20 121.60(10) . . ?
C22 C21 C26 117.78(11) . . ?
C26 C21 C20 120.20(10) . . ?
C23 C22 C21 121.85(11) . . ?
C22 C23 C24 120.06(11) . . ?
C25 C24 C23 119.75(12) . . ?
C24 C25 C26 121.33(11) . . ?
C21 C26 C1 119.80(11) . . ?
C25 C26 C1 120.96(11) . . ?
C25 C26 C21 119.10(11) . . ?

_shelx_res_file                  
;
TITL
CELL 0.71073 8.5356 15.5623 13.664 90 98.3803 90
ZERR 4 0.0011 0.0019 0.0017 0 0.0025 0
LATT 1
SYMM -X,0.5+Y,0.5-Z
SFAC C H
UNIT 112 80

L.S. 10
PLAN  20
SIZE 0.02 0.161 0.226
TEMP -173
fmap 2 53
acta
OMIT 0 1 1
OMIT 1 0 0
REM <olex2.extras>
REM <HklSrc "%.\\9092sadabs.hkl">
REM </olex2.extras>

WGHT    0.064800    0.644400
FVAR       0.13646
C1    1    0.767789    0.557885    0.829482    11.00000    0.01275    0.02880 =
         0.01755   -0.00923    0.00323   -0.00236
C2    1    0.777167    0.490613    0.892927    11.00000    0.01349    0.02784 =
         0.01883   -0.00886   -0.00158    0.00253
AFIX  43
H2    2    0.877697    0.476076    0.928532    11.00000   -1.20000
AFIX   0
C3    1    0.642877    0.440459    0.908822    11.00000    0.01790    0.01879 =
         0.01471   -0.00530   -0.00032    0.00420
C4    1    0.655659    0.379906    0.987610    11.00000    0.02622    0.02130 =
         0.01444   -0.00386   -0.00427    0.00845
AFIX  43
H4    2    0.756457    0.367391    1.024175    11.00000   -1.20000
AFIX   0
C5    1    0.524588    0.339932    1.010796    11.00000    0.03403    0.01727 =
         0.01204   -0.00078    0.00122    0.00802
AFIX  43
H5    2    0.531279    0.306941    1.069757    11.00000   -1.20000
AFIX   0
C6    1    0.377032    0.347047    0.947420    11.00000    0.02594    0.01311 =
         0.01410   -0.00145    0.00529    0.00418
C7    1    0.240084    0.305863    0.972781    11.00000    0.03352    0.01417 =
         0.01764    0.00094    0.01112    0.00246
AFIX  43
H7    2    0.246669    0.274659    1.032998    11.00000   -1.20000
AFIX   0
C8    1    0.100124    0.310640    0.911929    11.00000    0.02735    0.01393 =
         0.02608    0.00081    0.01395   -0.00138
AFIX  43
H8    2    0.005906    0.291198    0.934223    11.00000   -1.20000
AFIX   0
C9    1    0.093575    0.344714    0.814573    11.00000    0.01857    0.01217 =
         0.02266   -0.00107    0.00825    0.00077
C10   1   -0.050107    0.339386    0.746522    11.00000    0.01516    0.01458 =
         0.03245   -0.00179    0.00970   -0.00269
AFIX  43
H10   2   -0.143114    0.319766    0.770159    11.00000   -1.20000
AFIX   0
C11   1   -0.059555    0.361066    0.649839    11.00000    0.01291    0.01396 =
         0.02926   -0.00359    0.00207    0.00015
C12   1    0.083567    0.385527    0.612294    11.00000    0.01267    0.01204 =
         0.02168   -0.00286    0.00182    0.00062
C13   1    0.083259    0.401621    0.510360    11.00000    0.01697    0.01629 =
         0.02066   -0.00318   -0.00402    0.00124
AFIX  43
H13   2   -0.014626    0.402584    0.467198    11.00000   -1.20000
AFIX   0
C14   1    0.220968    0.415836    0.472591    11.00000    0.02340    0.01923 =
         0.01451   -0.00196    0.00052    0.00092
AFIX  43
H14   2    0.217923    0.428309    0.404281    11.00000   -1.20000
AFIX   0
C15   1    0.366655    0.411932    0.535061    11.00000    0.01765    0.01791 =
         0.01600   -0.00274    0.00396   -0.00121
AFIX  43
H15   2    0.462851    0.417267    0.508285    11.00000   -1.20000
AFIX   0
C16   1    0.369909    0.400351    0.635258    11.00000    0.01231    0.01566 =
         0.01501   -0.00252    0.00108   -0.00069
AFIX  43
H16   2    0.469214    0.398876    0.676928    11.00000   -1.20000
AFIX   0
C17   1    0.229638    0.390598    0.677846    11.00000    0.01262    0.01086 =
         0.01619   -0.00118    0.00176    0.00069
C18   1    0.230923    0.379379    0.783727    11.00000    0.01416    0.01086 =
         0.01692   -0.00037    0.00441    0.00118
C19   1    0.367843    0.394685    0.857872    11.00000    0.01655    0.01214 =
         0.01428   -0.00123    0.00469    0.00294
C20   1    0.495309    0.454257    0.849362    11.00000    0.01459    0.01533 =
         0.01130   -0.00241    0.00285    0.00287
C21   1    0.477548    0.533544    0.792538    11.00000    0.01396    0.01529 =
         0.01092   -0.00276    0.00334   -0.00110
C22   1    0.326739    0.567682    0.756482    11.00000    0.01360    0.01501 =
         0.01395   -0.00193    0.00313   -0.00094
AFIX  43
H22   2    0.234916    0.535720    0.765106    11.00000   -1.20000
AFIX   0
C23   1    0.309182    0.645829    0.709287    11.00000    0.01805    0.01696 =
         0.01692    0.00082    0.00107    0.00030
AFIX  43
H23   2    0.206239    0.667441    0.686478    11.00000   -1.20000
AFIX   0
C24   1    0.443265    0.693748    0.694754    11.00000    0.02591    0.01752 =
         0.01905    0.00289    0.00572   -0.00379
AFIX  43
H24   2    0.431339    0.746899    0.660275    11.00000   -1.20000
AFIX   0
C25   1    0.591609    0.663509    0.730549    11.00000    0.01987    0.02251 =
         0.01838   -0.00180    0.00740   -0.00726
AFIX  43
H25   2    0.681836    0.696296    0.720596    11.00000   -1.20000
AFIX   0
C26   1    0.612883    0.584478    0.781982    11.00000    0.01470    0.01995 =
         0.01353   -0.00483    0.00451   -0.00290
C27   1    0.914094    0.607705    0.815236    11.00000    0.01623    0.04634 =
         0.02331   -0.00901    0.00534   -0.00893
AFIX 137
H27A  2    0.924646    0.608906    0.744786    11.00000   -1.50000
H27B  2    1.007430    0.580017    0.852408    11.00000   -1.50000
H27C  2    0.905384    0.666603    0.839247    11.00000   -1.50000
AFIX   0
C28   1   -0.213638    0.353347    0.581167    11.00000    0.01441    0.02425 =
         0.04103   -0.00274   -0.00155   -0.00236
AFIX 137
H28A  2   -0.242152    0.409322    0.550836    11.00000   -1.50000
H28B  2   -0.296972    0.334432    0.618607    11.00000   -1.50000
H28C  2   -0.202125    0.311261    0.529340    11.00000   -1.50000
AFIX   0
HKLF 4

REM
REM R1 =  0.0471 for    4161 Fo > 4sig(Fo)  and  0.0700 for all    5540 data
REM    255 parameters refined using      0 restraints

END

WGHT      0.0646      0.6530

REM Highest difference peak  0.402,  deepest hole -0.218,  1-sigma level  0.054
Q1    1   0.4037  0.5431  0.7627  11.00000  0.05    0.40
Q2    1   0.5423  0.5583  0.7892  11.00000  0.05    0.39
Q3    1   0.1600  0.3841  0.6418  11.00000  0.05    0.39
Q4    1   0.5747  0.4432  0.8769  11.00000  0.05    0.38
Q5    1   0.2982  0.3974  0.6551  11.00000  0.05    0.35
Q6    1   0.5152  0.6650  0.6999  11.00000  0.05    0.34
Q7    1   0.1009  0.3277  0.8587  11.00000  0.05    0.34
Q8    1   0.6481  0.3987  0.9402  11.00000  0.05    0.33
Q9    1   0.6940  0.5736  0.8044  11.00000  0.05    0.33
Q10   1   0.7075  0.4660  0.8917  11.00000  0.05    0.33
Q11   1   0.4844  0.4975  0.8183  11.00000  0.05    0.32
Q12   1   0.2893  0.4169  0.5125  11.00000  0.05    0.32
Q13   1   0.0828  0.3951  0.5613  11.00000  0.05    0.32
Q14   1   0.4551  0.3531  0.9819  11.00000  0.05    0.31
Q15   1   0.8398  0.5812  0.8196  11.00000  0.05    0.31
Q16   1   0.1621  0.3589  0.8000  11.00000  0.05    0.31
Q17   1   0.3056  0.3183  0.9438  11.00000  0.05    0.30
Q18   1   0.2485  0.3841  0.7318  11.00000  0.05    0.30
Q19   1   0.3845  0.6610  0.6959  11.00000  0.05    0.30
Q20   1   0.3604  0.4056  0.5847  11.00000  0.05    0.30
;
_shelx_res_checksum              72240
_shelx_hkl_file                  
;
  -1   0   0    0.00    0.02
  -1   0   0    0.00    0.02
   1   0   0   -0.09    0.03
   1   0   0   -0.01    0.02
  -1   0   0    0.01    0.03
   2   0   0    6.45    0.29
  -2   0   0    6.58    0.26
  -2   0   0    6.53    0.21
  -2   0   0    6.45    0.27
  -2   0   0    6.32    0.23
   2   0   0    6.07    0.29
   2   0   0    6.37    0.25
  -3   0   0    9.50    0.34
  -3   0   0   10.19    0.38
   3   0   0    8.39    0.40
  -3   0   0    8.88    0.39
   3   0   0    9.53    0.36
  -3   0   0    9.60    0.31
   3   0   0    9.60    0.43
   4   0   0    0.61    0.14
   4   0   0    0.38    0.17
  -4   0   0    0.74    0.17
   4   0   0    0.60    0.19
  -4   0   0    0.74    0.16
  -4   0   0    0.75    0.14
  -5   0   0   -0.08    0.13
  -5   0   0    0.02    0.12
   5   0   0   -0.02    0.11
  -5   0   0   -0.01    0.09
  -5   0   0    0.05    0.10
   5   0   0    0.35    0.19
   5   0   0   -0.02    0.14
  -6   0   0   31.28    0.94
   6   0   0   32.45    1.14
  -6   0   0   31.14    0.94
  -6   0   0   30.40    1.09
   6   0   0   31.68    1.01
  -6   0   0   30.97    1.01
   6   0   0   29.06    1.10
   7   0   0  169.58    4.18
  -7   0   0  165.16    3.80
  -7   0   0  164.79    3.85
   7   0   0  163.22    4.19
  -7   0   0  161.01    4.11
  -7   0   0  170.43    3.98
   7   0   0  171.46    3.97
  -8   0   0    6.97    0.46
  -8   0   0    7.17    0.58
  -8   0   0    6.12    0.54
   8   0   0    7.57    0.63
  -8   0   0    7.20    0.46
   8   0   0    7.29    0.53
   8   0   0    6.86    0.68
  -9   0   0    4.90    0.48
  -9   0   0    6.02    0.67
   9   0   0    5.45    0.55
   9   0   0    4.30    0.60
  -9   0   0    4.71    0.47
   9   0   0    4.82    0.64
  10   0   0   -0.57    0.26
  10   0   0    0.62    0.37
 -10   0   0    0.19    0.23
 -10   0   0    0.30    0.31
  11   0   0    0.89    0.47
 -11   0   0    1.03    0.34
 -11   0   0    0.47    0.48
  11   0   0    1.10    0.48
 -12   0   0   -0.32    0.32
  12   0   0    0.28    0.47
 -12   0   0    0.36    0.39
  12   0   0    0.13    0.47
   0  -1   0    0.00    0.01
   0  -1   0    0.00    0.01
   0  -1   0   -0.01    0.01
   0   1   0   -0.01    0.01
   0   1   0    0.00    0.01
   2  -1   0   12.53    0.43
   2  -1   0   13.60    0.45
   2  -1   0   13.27    0.40
  -2  -1   0   13.07    0.40
  -2  -1   0   13.10    0.42
  -2  -1   0   12.70    0.38
  -2  -1   0   13.57    0.37
   2   1   0   13.03    0.43
   2   1   0   13.73    0.40
  -2   1   0   13.42    0.36
   2   1   0   13.07    0.45
  -2   1   0   12.87    0.39
  -2   1   0   13.10    0.40
  -2   1   0   12.69    0.43
  -3  -1   0   15.00    0.48
   3  -1   0   15.48    0.50
  -3  -1   0   15.77    0.51
   3  -1   0   15.45    0.56
  -3  -1   0   15.69    0.53
  -3  -1   0   15.15    0.45
   3   1   0   16.29    0.58
   3   1   0   16.04    0.56
  -3   1   0   15.62    0.50
  -3   1   0   14.94    0.54
  -3   1   0   15.90    0.45
   3   1   0   15.17    0.49
  -3   1   0   14.96    0.50
   4  -1   0    0.05    0.10
  -4  -1   0    0.12    0.14
  -4  -1   0    0.00    0.08
   4  -1   0    0.12    0.14
  -4  -1   0    0.08    0.09
   4  -1   0   -0.18    0.12
  -4  -1   0   -0.06    0.10
  -4   1   0    0.07    0.11
   4   1   0    0.05    0.09
  -4   1   0    0.06    0.08
   4   1   0    0.01    0.17
   4   1   0    0.02    0.13
  -4   1   0    0.00    0.12
  -4   1   0   -0.07    0.10
   5  -1   0    0.31    0.17
  -5  -1   0    0.30    0.12
  -5  -1   0    0.10    0.10
  -5  -1   0    0.03    0.13
   5  -1   0    0.28    0.13
  -5  -1   0    0.20    0.14
   5  -1   0   -0.09    0.13
  -5   1   0    0.17    0.13
  -5   1   0    0.22    0.13
   5   1   0    0.17    0.12
  -5   1   0    0.01    0.13
  -5   1   0   -0.10    0.08
   5   1   0    0.32    0.18
   5   1   0   -0.20    0.17
  -6  -1   0    9.90    0.46
   6  -1   0    9.25    0.57
  -6  -1   0    9.41    0.43
  -6  -1   0    9.60    0.55
   6  -1   0   10.11    0.50
  -6  -1   0    9.45    0.51
   6  -1   0    8.34    0.55
  -6   1   0    9.30    0.56
  -6   1   0   10.08    0.50
   6   1   0    9.87    0.58
   6   1   0    9.28    0.50
  -6   1   0    9.76    0.48
  -6   1   0    9.33    0.43
   6   1   0    9.31    0.61
   7  -1   0   72.43    2.13
  -7  -1   0   73.25    1.97
   7  -1   0   69.84    1.95
  -7  -1   0   70.33    1.81
   7  -1   0   70.34    2.11
  -7  -1   0   70.38    1.88
  -7  -1   0   72.88    2.08
  -7   1   0   71.16    1.88
   7   1   0   68.18    2.09
  -7   1   0   73.50    2.11
  -7   1   0   71.12    1.95
   7   1   0   72.64    2.14
  -7   1   0   71.72    1.85
   7   1   0   71.36    1.94
  -8  -1   0    3.24    0.37
  -8  -1   0    3.60    0.51
  -8  -1   0    3.67    0.37
  -8  -1   0    3.28    0.42
   8  -1   0    3.23    0.40
   8  -1   0    2.91    0.47
   8   1   0    3.51    0.41
   8   1   0    4.19    0.53
   8   1   0    3.81    0.53
  -8   1   0    4.02    0.43
  -8   1   0    4.69    0.38
  -8   1   0    4.00    0.52
   9  -1   0    0.07    0.23
  -9  -1   0    0.16    0.25
   9  -1   0    0.07    0.32
  -9  -1   0    0.35    0.22
   9  -1   0    0.16    0.26
  -9   1   0    0.01    0.25
  -9   1   0   -0.13    0.17
   9   1   0    0.24    0.33
  -9   1   0    0.26    0.19
   9   1   0   -0.02    0.30
  10  -1   0    1.22    0.40
 -10  -1   0    2.21    0.39
 -10  -1   0    2.13    0.47
  10  -1   0    1.63    0.49
  10   1   0    0.81    0.37
  10   1   0    1.82    0.48
 -10   1   0    1.21    0.40
 -10   1   0    2.23    0.37
  11  -1   0    0.97    0.47
 -11  -1   0    0.33    0.30
  11  -1   0    0.53    0.38
 -11  -1   0    0.53    0.44
  11   1   0    0.74    0.45
 -11   1   0   -0.04    0.25
 -11   1   0    0.09    0.42
  11   1   0    0.31    0.39
  12  -1   0   -0.38    0.43
 -12  -1   0   -0.06    0.34
 -12  -1   0   -0.18    0.39
  12  -1   0   -0.18    0.39
 -12  -1   0   -0.44    0.41
 -12   1   0   -0.37    0.33
  12   1   0   -0.40    0.44
  12   1   0   -0.21    0.44
   1  -2   0   36.82    0.86
  -1  -2   0   36.27    0.89
   1  -2   0   35.69    0.91
  -1  -2   0   38.09    0.84
  -1  -2   0   36.57    0.87
   1  -2   0   37.86    0.91
  -1  -2   0   37.38    0.86
  -1  -2   0   37.69    0.87
   1  -2   0   36.37    0.85
   1   2   0   38.00    0.93
  -1   2   0   38.02    0.88
  -1   2   0   36.99    0.85
   1   2   0   36.39    0.91
  -1   2   0   36.91    0.88
   1   2   0   37.82    0.83
   1   2   0   37.66    0.85
   2  -2   0   15.68    0.45
   2  -2   0   15.52    0.51
  -2  -2   0   15.60    0.45
  -2  -2   0   16.31    0.47
   2  -2   0   15.88    0.51
  -2  -2   0   14.62    0.44
  -2  -2   0   15.89    0.46
  -2   2   0   15.82    0.46
  -2   2   0   15.46    0.48
   2   2   0   14.92    0.49
  -2   2   0   15.92    0.39
  -2   2   0   15.73    0.49
   2   2   0   15.64    0.53
  -3  -2   0   -0.01    0.08
  -3  -2   0   -0.04    0.09
   3  -2   0   -0.04    0.11
   3  -2   0   -0.01    0.08
  -3  -2   0    0.14    0.10
   3  -2   0   -0.09    0.11
  -3  -2   0   -0.05    0.08
  -3   2   0   -0.13    0.09
   3   2   0    0.03    0.10
   3   2   0    0.01    0.13
  -3   2   0   -0.10    0.10
  -3   2   0    0.01    0.05
   3   2   0   -0.04    0.07
  -3   2   0    0.05    0.09
   4  -2   0    2.32    0.22
  -4  -2   0    2.37    0.18
   4  -2   0    2.04    0.25
  -4  -2   0    1.98    0.23
  -4  -2   0    2.77    0.28
   4  -2   0    2.23    0.28
  -4  -2   0    2.20    0.22
   4   2   0    2.45    0.31
  -4   2   0    2.18    0.22
   4   2   0    2.93    0.30
  -4   2   0    2.59    0.25
  -4   2   0    2.20    0.17
  -4   2   0    2.28    0.27
   4   2   0    2.06    0.21
   5  -2   0    0.19    0.17
   5  -2   0    0.30    0.13
  -5  -2   0    0.34    0.11
  -5  -2   0    0.63    0.17
  -5  -2   0    0.72    0.19
  -5  -2   0    0.25    0.13
   5  -2   0    0.18    0.17
  -5   2   0    0.51    0.16
  -5   2   0    0.22    0.10
  -5   2   0    0.55    0.19
   5   2   0    0.47    0.19
  -5   2   0    0.33    0.14
   5   2   0    0.71    0.23
   5   2   0    0.11    0.12
  -6  -2   0    5.70    0.41
  -6  -2   0    5.85    0.36
   6  -2   0    4.96    0.49
  -6  -2   0    5.58    0.32
  -6  -2   0    5.24    0.42
   6  -2   0    6.67    0.47
   6  -2   0    6.24    0.40
   6   2   0    6.27    0.41
  -6   2   0    5.50    0.38
  -6   2   0    5.35    0.39
  -6   2   0    6.34    0.46
   6   2   0    5.75    0.46
   6   2   0    5.28    0.52
  -6   2   0    5.55    0.32
   7  -2   0   18.56    0.78
  -7  -2   0   17.28    0.65
  -7  -2   0   18.08    0.65
   7  -2   0   16.86    0.82
  -7  -2   0   18.67    0.84
  -7  -2   0   18.47    0.74
   7  -2   0   17.61    0.91
  -7   2   0   18.40    0.87
   7   2   0   18.18    0.77
  -7   2   0   18.75    0.77
   7   2   0   18.67    0.88
   7   2   0   17.51    0.90
  -7   2   0   18.27    0.67
  -7   2   0   17.95    0.75
   8  -2   0    6.26    0.66
  -8  -2   0    6.18    0.40
  -8  -2   0    7.15    0.50
   8  -2   0    6.59    0.63
  -8  -2   0    6.93    0.56
  -8  -2   0    7.00    0.65
   8  -2   0    5.79    0.48
  -8   2   0    7.58    0.63
  -8   2   0    7.04    0.50
   8   2   0    7.31    0.53
   8   2   0    6.60    0.68
  -8   2   0    6.18    0.42
   8   2   0    6.66    0.67
   9  -2   0    0.45    0.29
   9  -2   0    0.01    0.33
  -9  -2   0    0.15    0.18
  -9  -2   0    0.20    0.27
   9  -2   0   -0.22    0.22
  -9   2   0    0.09    0.19
  -9   2   0    0.15    0.22
   9   2   0    0.39    0.31
   9   2   0    0.07    0.27
  -9   2   0    0.40    0.28
  10  -2   0   -0.24    0.31
 -10  -2   0   -0.16    0.21
  10  -2   0    0.55    0.38
 -10  -2   0   -0.07    0.30
 -10   2   0    0.59    0.34
 -10   2   0    0.09    0.24
  10   2   0   -0.26    0.28
 -10   2   0   -0.18    0.20
  10   2   0    0.38    0.39
  11  -2   0    0.75    0.42
 -11  -2   0    0.54    0.41
  11  -2   0    0.77    0.43
 -11  -2   0    0.53    0.31
  11   2   0    0.27    0.39
 -11   2   0    0.12    0.38
  11   2   0    1.39    0.49
  12  -2   0    0.07    0.43
 -12  -2   0    0.18    0.42
  12  -2   0    0.44    0.47
 -12  -2   0   -0.13    0.34
 -12  -2   0    0.20    0.35
  12   2   0    0.59    0.46
 -12   2   0    0.34    0.46
  12   2   0    0.36    0.50
   0  -3   0   -0.03    0.05
   0  -3   0   -0.03    0.04
   0  -3   0    0.04    0.07
   0  -3   0   -0.08    0.05
   0   3   0   -0.07    0.06
   0   3   0   -0.03    0.03
   0   3   0   -0.09    0.07
   0   3   0    0.00    0.04
  -1  -3   0   97.42    2.17
  -1  -3   0   99.29    2.15
  -1  -3   0   98.26    2.07
   1  -3   0   92.81    2.21
   1  -3   0   98.56    2.13
  -1  -3   0   96.90    2.11
   1  -3   0   95.61    2.11
  -1  -3   0   96.49    2.11
   1  -3   0   87.74    2.20
  -1  -3   0   94.44    2.13
   1   3   0   95.18    2.07
   1   3   0   99.05    2.24
  -1   3   0  101.16    2.15
  -1   3   0   95.90    2.14
   1   3   0   97.99    2.10
  -1   3   0   96.67    2.10
  -2  -3   0    1.83    0.15
  -2  -3   0    1.53    0.15
  -2  -3   0    2.02    0.15
   2  -3   0    1.50    0.20
   2  -3   0    1.62    0.18
  -2  -3   0    1.98    0.17
   2  -3   0    1.92    0.16
  -2   3   0    1.88    0.20
  -2   3   0    1.74    0.18
  -2   3   0    1.80    0.08
   2   3   0    1.66    0.13
   2   3   0    2.06    0.22
   2   3   0    1.89    0.15
   2   3   0    1.70    0.19
  -2   3   0    2.05    0.17
  -3  -3   0   31.42    0.88
  -3  -3   0   33.19    0.90
   3  -3   0   32.79    0.88
  -3  -3   0   32.66    0.86
  -3  -3   0   33.81    0.89
   3  -3   0   31.77    0.95
   3   3   0   32.77    0.87
  -3   3   0   32.25    0.87
  -3   3   0   32.95    0.95
  -3   3   0   32.02    0.77
   3   3   0   32.04    0.98
   3   3   0   31.56    0.94
  -3   3   0   32.93    0.92
   4  -3   0   12.96    0.58
   4  -3   0   13.11    0.57
  -4  -3   0   13.55    0.50
   4  -3   0   12.29    0.49
  -4  -3   0   12.46    0.51
  -4  -3   0   13.03    0.46
  -4  -3   0   12.90    0.51
  -4   3   0   12.67    0.55
  -4   3   0   12.93    0.40
   4   3   0   12.29    0.48
   4   3   0   11.91    0.58
  -4   3   0   13.08    0.49
   4   3   0   12.85    0.56
  -4   3   0   13.25    0.53
   5  -3   0    7.40    0.46
   5  -3   0    7.48    0.40
  -5  -3   0    7.33    0.39
  -5  -3   0    7.50    0.42
  -5  -3   0    7.04    0.42
  -5  -3   0    6.96    0.34
   5  -3   0    7.25    0.48
  -5   3   0    7.62    0.43
   5   3   0    7.68    0.48
   5   3   0    6.57    0.38
   5   3   0    6.10    0.45
  -5   3   0    7.33    0.40
  -5   3   0    7.77    0.47
  -5   3   0    7.23    0.32
   6  -3   0   19.43    0.75
   6  -3   0   20.29    0.89
  -6  -3   0   18.41    0.78
  -6  -3   0   18.47    0.66
   6  -3   0   20.25    0.83
  -6  -3   0   19.06    0.76
  -6  -3   0   20.36    0.74
   6   3   0   18.06    0.85
  -6   3   0   19.20    0.74
  -6   3   0   19.13    0.75
   6   3   0   20.18    0.75
  -6   3   0   18.68    0.82
   6   3   0   20.59    0.85
  -6   3   0   18.34    0.63
  -7  -3   0   33.15    0.96
   7  -3   0   34.74    1.14
  -7  -3   0   33.79    1.10
   7  -3   0   33.12    1.29
   7  -3   0   32.62    1.22
  -7  -3   0   33.39    1.02
  -7  -3   0   34.46    1.21
  -7  -3   0   34.22    1.17
   7   3   0   33.18    1.30
   7   3   0   33.28    1.13
  -7   3   0   31.86    1.24
  -7   3   0   33.59    1.00
  -7   3   0   33.24    1.21
   7   3   0   33.31    1.26
  -7   3   0   32.28    1.12
   8  -3   0    4.24    0.51
  -8  -3   0    3.81    0.36
   8  -3   0    3.87    0.46
  -8  -3   0    3.64    0.35
  -8  -3   0    3.77    0.44
   8  -3   0    4.54    0.57
  -8  -3   0    3.67    0.41
  -8  -3   0    4.44    0.55
  -8   3   0    3.98    0.53
   8   3   0    4.39    0.58
  -8   3   0    4.13    0.47
   8   3   0    2.63    0.47
  -8   3   0    4.10    0.38
   9  -3   0    0.44    0.34
  -9  -3   0    0.19    0.27
  -9  -3   0    0.25    0.22
   9  -3   0   -0.05    0.22
   9  -3   0    0.20    0.29
   9   3   0    0.10    0.29
  -9   3   0    0.09    0.30
   9   3   0    0.21    0.32
  -9   3   0    0.13    0.23
  -9   3   0    0.01    0.18
  10  -3   0    3.63    0.60
 -10  -3   0    3.85    0.48
  10  -3   0    2.37    0.55
 -10  -3   0    2.43    0.51
 -10   3   0    3.77    0.42
 -10   3   0    3.94    0.62
  10   3   0    2.40    0.54
  10   3   0    2.98    0.54
 -10   3   0    3.93    0.51
  11  -3   0   -0.24    0.36
 -11  -3   0    0.97    0.39
 -11  -3   0    0.75    0.43
  11  -3   0    0.68    0.40
  11   3   0    0.57    0.44
  11   3   0    0.64    0.46
 -11   3   0    0.23    0.45
  12  -3   0    0.30    0.50
  12   3   0   -0.14    0.40
   0  -4   0  979.03   20.90
   0  -4   0  990.50   20.77
   0  -4   0  986.65   20.99
   0  -4   0  999.15   20.66
   0   4   0 1000.00   21.25
   0   4   0  996.93   20.36
   0   4   0  979.34   20.85
  -1  -4   0   14.10    0.44
  -1  -4   0   13.60    0.40
  -1  -4   0   14.26    0.43
  -1  -4   0   13.36    0.46
   1  -4   0   13.52    0.47
   1  -4   0   12.85    0.40
   1  -4   0   14.09    0.42
  -1   4   0   13.87    0.47
  -1   4   0   14.38    0.41
   1   4   0   14.58    0.51
   1   4   0   14.20    0.43
   1   4   0   14.01    0.39
   2  -4   0    1.53    0.19
  -2  -4   0    1.77    0.13
   2  -4   0    1.67    0.15
  -2  -4   0    1.63    0.16
   2  -4   0    1.60    0.21
  -2  -4   0    1.63    0.16
   2  -4   0    1.56    0.14
  -2  -4   0    1.70    0.17
   2   4   0    1.69    0.23
   2   4   0    1.59    0.15
   2   4   0    2.05    0.22
  -2   4   0    1.73    0.18
   2   4   0    1.84    0.16
  -2   4   0    2.10    0.22
  -2   4   0    1.55    0.15
  -3  -4   0   65.94    1.64
   3  -4   0   68.48    1.63
  -3  -4   0   65.75    1.62
  -3  -4   0   69.19    1.61
   3  -4   0   67.11    1.75
  -3  -4   0   67.00    1.62
   3  -4   0   66.05    1.72
  -3   4   0   65.56    1.69
   3   4   0   67.96    1.71
  -3   4   0   66.71    1.67
   3   4   0   63.54    1.76
  -3   4   0   67.29    1.60
  -3   4   0   67.20    1.47
   3   4   0   69.00    1.61
   4  -4   0   46.12    1.34
  -4  -4   0   45.92    1.20
  -4  -4   0   43.77    1.20
  -4  -4   0   44.56    1.16
  -4  -4   0   43.73    1.21
   4  -4   0   43.82    1.29
   4  -4   0   43.90    1.19
   4   4   0   44.95    1.18
   4   4   0   41.74    1.32
  -4   4   0   45.49    1.25
  -4   4   0   43.87    1.17
   4   4   0   41.65    1.27
  -4   4   0   44.79    1.05
  -4   4   0   43.11    1.27
  -5  -4   0    0.08    0.14
  -5  -4   0    0.17    0.12
  -5  -4   0    0.25    0.14
   5  -4   0    0.30    0.17
   5  -4   0    0.17    0.12
   5  -4   0    0.02    0.18
  -5  -4   0    0.23    0.14
   5   4   0    0.20    0.17
   5   4   0    0.24    0.21
  -5   4   0    0.30    0.10
  -5   4   0    0.23    0.15
   5   4   0    0.03    0.12
  -5   4   0    0.15    0.12
  -5   4   0   -0.05    0.14
   6  -4   0   17.00    0.81
  -6  -4   0   15.20    0.69
   6  -4   0   15.85    0.68
   6  -4   0   17.16    0.77
  -6  -4   0   15.22    0.65
  -6  -4   0   16.17    0.61
  -6  -4   0   15.64    0.69
   6   4   0   16.51    0.76
  -6   4   0   16.26    0.66
  -6   4   0   15.52    0.71
  -6   4   0   16.67    0.77
   6   4   0   15.11    0.66
  -6   4   0   16.37    0.55
   6   4   0   15.54    0.81
  -7  -4   0   37.02    1.24
  -7  -4   0   36.16    0.99
   7  -4   0   37.87    1.34
   7  -4   0   36.76    1.22
  -7  -4   0   34.98    1.10
  -7  -4   0   35.78    1.17
  -7  -4   0   36.31    1.25
   7  -4   0   35.63    1.36
  -7   4   0   36.24    1.04
   7   4   0   36.06    1.33
  -7   4   0   36.27    1.23
  -7   4   0   38.08    1.37
   7   4   0   35.31    1.39
   7   4   0   35.13    1.19
   8  -4   0   -0.05    0.20
  -8  -4   0   -0.26    0.21
  -8  -4   0    0.18    0.25
   8  -4   0    0.01    0.23
   8  -4   0    0.00    0.25
  -8  -4   0   -0.09    0.20
  -8  -4   0    0.11    0.18
  -8   4   0    0.15    0.15
   8   4   0    0.06    0.32
  -8   4   0   -0.09    0.21
   8   4   0    0.23    0.29
  -8   4   0    0.13    0.27
  -9  -4   0   -0.01    0.24
   9  -4   0    0.07    0.24
   9  -4   0   -0.42    0.31
  -9  -4   0    0.10    0.30
   9  -4   0   -0.04    0.21
  -9   4   0   -0.06    0.25
   9   4   0   -0.23    0.32
  -9   4   0    0.15    0.19
   9   4   0   -0.05    0.29
  -9   4   0    0.07    0.28
 -10  -4   0    0.08    0.32
  10  -4   0    0.07    0.32
  10  -4   0    0.55    0.31
 -10  -4   0   -0.04    0.25
  10  -4   0    0.49    0.30
  10   4   0   -0.39    0.33
 -10   4   0    0.24    0.29
 -10   4   0    0.22    0.28
  10   4   0    0.02    0.34
 -11  -4   0    1.11    0.40
 -11  -4   0    1.02    0.39
  11  -4   0    0.31    0.45
  11  -4   0    1.18    0.51
 -11  -4   0    1.01    0.46
  11   4   0    0.52    0.51
  11   4   0    0.78    0.49
 -11   4   0    0.57    0.47
   0  -5   0    0.03    0.07
   0  -5   0    0.06    0.05
   0  -5   0    0.07    0.08
   0  -5   0    0.09    0.11
   0   5   0    0.22    0.12
   0   5   0    0.05    0.04
   0   5   0   -0.10    0.09
   1  -5   0   -0.07    0.09
  -1  -5   0    0.07    0.06
  -1  -5   0    0.21    0.07
   1  -5   0    0.07    0.08
  -1  -5   0    0.13    0.09
   1  -5   0    0.15    0.09
  -1  -5   0    0.04    0.08
  -1  -5   0    0.21    0.10
   1  -5   0    0.14    0.03
   1   5   0    0.11    0.12
   1   5   0    0.22    0.10
  -1   5   0   -0.05    0.10
  -1   5   0    0.14    0.07
  -2  -5   0    4.59    0.27
  -2  -5   0    5.50    0.28
  -2  -5   0    4.89    0.25
  -2  -5   0    5.07    0.20
  -2  -5   0    4.66    0.29
   2  -5   0    4.90    0.32
   2  -5   0    4.98    0.25
   2  -5   0    4.95    0.32
   2  -5   0    5.27    0.25
  -2   5   0    4.95    0.27
   2   5   0    5.28    0.24
   2   5   0    5.22    0.33
   2   5   0    4.86    0.33
   2   5   0    5.36    0.26
  -2   5   0    5.51    0.32
  -3  -5   0   24.50    0.68
  -3  -5   0   23.02    0.73
   3  -5   0   23.07    0.66
   3  -5   0   24.12    0.80
  -3  -5   0   23.24    0.72
  -3  -5   0   23.35    0.72
   3  -5   0   23.27    0.82
   3  -5   0   23.39    0.71
  -3   5   0   24.19    0.69
  -3   5   0   23.85    0.77
   3   5   0   23.97    0.64
   3   5   0   23.55    0.69
   3   5   0   23.18    0.79
  -3   5   0   22.14    0.77
   3   5   0   23.74    0.85
  -3   5   0   23.34    0.54
   4  -5   0    0.08    0.16
   4  -5   0    0.13    0.11
  -4  -5   0   -0.01    0.10
  -4  -5   0   -0.03    0.10
   4  -5   0    0.19    0.15
  -4  -5   0   -0.05    0.09
  -4  -5   0    0.15    0.10
   4   5   0    0.04    0.10
  -4   5   0    0.06    0.06
   4   5   0   -0.04    0.14
  -4   5   0    0.06    0.10
  -4   5   0    0.21    0.16
  -4   5   0    0.11    0.14
   4   5   0   -0.01    0.15
  -5  -5   0    9.10    0.47
  -5  -5   0   10.06    0.50
   5  -5   0    9.15    0.54
   5  -5   0   10.22    0.59
  -5  -5   0    9.62    0.45
  -5  -5   0   10.32    0.48
   5  -5   0    8.60    0.47
   5   5   0    9.84    0.47
  -5   5   0    9.59    0.46
  -5   5   0    9.32    0.51
   5   5   0   10.42    0.56
  -5   5   0    9.75    0.35
  -5   5   0    9.74    0.54
   5   5   0    8.90    0.57
  -6  -5   0    2.09    0.27
  -6  -5   0    2.25    0.31
   6  -5   0    2.30    0.31
  -6  -5   0    1.90    0.29
   6  -5   0    1.31    0.32
  -6  -5   0    1.91    0.28
   6  -5   0    1.32    0.31
  -6   5   0    1.90    0.20
  -6   5   0    2.21    0.33
   6   5   0    2.33    0.36
  -6   5   0    2.01    0.27
   6   5   0    1.91    0.36
  -6   5   0    1.59    0.31
   6   5   0    2.22    0.30
  -7  -5   0   10.41    0.58
  -7  -5   0   10.35    0.62
   7  -5   0   10.90    0.74
  -7  -5   0   10.08    0.52
   7  -5   0    9.05    0.57
   7  -5   0   11.64    0.69
  -7  -5   0    8.69    0.55
  -7   5   0   10.75    0.63
  -7   5   0   10.37    0.67
   7   5   0    9.60    0.65
  -7   5   0   11.53    0.47
   7   5   0    9.40    0.68
  -8  -5   0    1.17    0.28
  -8  -5   0    0.97    0.31
   8  -5   0    0.71    0.34
  -8  -5   0    1.30    0.31
  -8  -5   0    1.05    0.25
   8  -5   0    0.84    0.26
   8  -5   0    0.50    0.30
   8   5   0    1.33    0.43
  -8   5   0    0.87    0.30
  -8   5   0    0.71    0.18
  -8   5   0    0.99    0.34
   8   5   0    1.03    0.38
   9  -5   0    0.06    0.28
   9  -5   0    0.08    0.30
   9  -5   0    0.24    0.24
  -9  -5   0   -0.08    0.22
  -9  -5   0   -0.07    0.27
  -9  -5   0    0.13    0.31
  -9  -5   0    0.27    0.22
   9   5   0    0.00    0.39
  -9   5   0    0.53    0.29
  -9   5   0    0.35    0.30
   9   5   0   -0.12    0.28
  10  -5   0   -0.04    0.30
  10  -5   0    0.37    0.36
 -10  -5   0   -0.26    0.23
 -10  -5   0    0.99    0.38
  10  -5   0    0.77    0.46
  10   5   0   -0.03    0.32
 -10   5   0   -0.13    0.29
 -10   5   0    0.22    0.31
  10   5   0   -0.17    0.34
 -11  -5   0   -0.02    0.34
  11  -5   0    0.36    0.47
 -11  -5   0   -0.44    0.38
  11  -5   0    0.63    0.43
 -11  -5   0    0.09    0.34
  11   5   0    0.28    0.40
  11   5   0   -0.01    0.42
 -11   5   0    0.48    0.46
 -11   5   0    0.32    0.38
   0  -6   0    0.32    0.13
   0  -6   0    0.21    0.10
   0  -6   0    0.33    0.09
   0  -6   0    0.35    0.07
   0   6   0    0.42    0.13
   0   6   0    0.47    0.15
  -1  -6   0    6.10    0.30
  -1  -6   0    7.30    0.35
   1  -6   0    6.74    0.20
  -1  -6   0    7.15    0.28
  -1  -6   0    7.26    0.33
  -1  -6   0    6.28    0.28
   1  -6   0    6.44    0.29
   1  -6   0    6.62    0.30
   1  -6   0    6.69    0.36
   1   6   0    6.92    0.32
  -1   6   0    7.08    0.27
   1   6   0    6.69    0.38
  -1   6   0    6.80    0.36
  -2  -6   0   19.88    0.66
   2  -6   0   19.34    0.68
   2  -6   0   18.29    0.57
  -2  -6   0   18.38    0.61
  -2  -6   0   18.82    0.48
   2  -6   0   17.91    0.58
   2  -6   0   17.47    0.57
  -2  -6   0   18.36    0.46
  -2  -6   0   18.16    0.58
  -2  -6   0   17.42    0.60
  -2   6   0   18.36    0.67
  -2   6   0   18.15    0.59
   2   6   0   19.40    0.58
   2   6   0   18.35    0.71
   2   6   0   18.65    0.54
   3  -6   0   30.47    0.98
  -3  -6   0   30.32    0.81
   3  -6   0   29.92    0.83
   3  -6   0   31.76    0.88
  -3  -6   0   31.41    0.89
  -3  -6   0   29.79    0.90
  -3  -6   0   30.46    0.90
   3  -6   0   30.68    1.02
   3   6   0   31.21    1.00
  -3   6   0   31.19    0.93
   3   6   0   28.81    1.02
   3   6   0   30.49    0.81
  -3   6   0   30.40    0.97
   3   6   0   28.83    0.83
   4  -6   0   14.54    0.64
   4  -6   0   13.88    0.56
  -4  -6   0   14.13    0.56
  -4  -6   0   14.58    0.56
   4  -6   0   13.54    0.48
  -4  -6   0   13.84    0.51
   4  -6   0   14.70    0.67
  -4  -6   0   15.04    0.59
   4   6   0   13.78    0.52
  -4   6   0   14.24    0.62
  -4   6   0   14.31    0.64
  -4   6   0   14.12    0.37
   4   6   0   13.90    0.63
  -4   6   0   14.61    0.53
   4   6   0   12.72    0.66
  -5  -6   0    3.78    0.31
   5  -6   0    3.68    0.43
  -5  -6   0    3.59    0.33
   5  -6   0    3.89    0.25
   5  -6   0    3.16    0.31
  -5  -6   0    3.86    0.30
  -5  -6   0    4.01    0.38
   5  -6   0    3.39    0.40
  -5   6   0    4.28    0.44
   5   6   0    4.00    0.42
  -5   6   0    3.86    0.19
   5   6   0    3.47    0.31
  -5   6   0    4.24    0.32
  -5   6   0    3.90    0.41
   5   6   0    3.86    0.45
   6  -6   0    1.72    0.19
  -6  -6   0    1.69    0.27
   6  -6   0    1.28    0.25
   6  -6   0    1.16    0.30
  -6  -6   0    1.87    0.28
  -6  -6   0    1.25    0.23
   6  -6   0    1.45    0.34
  -6  -6   0    1.63    0.30
   6   6   0    1.66    0.34
  -6   6   0    0.90    0.25
   6   6   0    1.31    0.33
  -6   6   0    1.09    0.27
   6   6   0    1.61    0.26
  -6   6   0    1.37    0.17
  -7  -6   0    6.69    0.59
  -7  -6   0    6.15    0.46
  -7  -6   0    6.53    0.43
   7  -6   0    5.67    0.64
   7  -6   0    6.81    0.58
   7  -6   0    5.07    0.48
  -7  -6   0    6.54    0.49
   7  -6   0    5.65    0.31
   7   6   0    6.51    0.67
  -7   6   0    7.12    0.53
  -7   6   0    6.13    0.33
  -7   6   0    6.13    0.62
   7   6   0    5.56    0.58
  -8  -6   0    6.82    0.56
   8  -6   0    6.48    0.65
  -8  -6   0    6.52    0.46
  -8  -6   0    6.06    0.61
   8  -6   0    7.12    0.56
  -8  -6   0    6.54    0.52
   8  -6   0    7.06    0.73
   8   6   0    6.11    0.71
  -8   6   0    6.43    0.64
  -8   6   0    7.03    0.70
   8   6   0    5.87    0.67
  -9  -6   0   -0.01    0.25
   9  -6   0    0.00    0.28
  -9  -6   0    0.09    0.25
  -9  -6   0    0.05    0.20
   9  -6   0    0.14    0.26
  -9  -6   0    0.11    0.29
   9  -6   0    0.53    0.32
  -9   6   0    0.61    0.35
  -9   6   0    0.44    0.29
   9   6   0   -0.70    0.29
   9   6   0   -0.20    0.34
  10  -6   0    0.91    0.45
 -10  -6   0    0.64    0.37
  10  -6   0    0.98    0.36
 -10  -6   0    1.56    0.38
 -10  -6   0    0.74    0.31
  10  -6   0    1.01    0.46
 -10   6   0    0.78    0.39
 -10   6   0    0.30    0.34
  10   6   0    0.49    0.46
  10   6   0    0.40    0.39
  11  -6   0    1.05    0.51
 -11  -6   0    2.61    0.57
 -11  -6   0    2.27    0.48
 -11  -6   0    2.58    0.48
  11  -6   0    2.53    0.59
 -11   6   0    1.99    0.55
  11   6   0    3.06    0.68
  11   6   0    2.20    0.58
 -11   6   0    2.36    0.61
   0  -7   0    0.16    0.09
   0  -7   0    0.15    0.07
   0  -7   0    0.22    0.11
   0  -7   0    0.17    0.13
   0   7   0    0.24    0.14
   0   7   0    0.21    0.05
   0   7   0   -0.01    0.13
  -1  -7   0   63.72    1.56
  -1  -7   0   59.54    1.58
  -1  -7   0   61.49    1.51
   1  -7   0   61.19    1.53
  -1  -7   0   62.41    1.48
  -1  -7   0   62.42    1.46
   1  -7   0   61.15    1.61
   1  -7   0   60.85    1.34
   1  -7   0   60.85    1.49
  -1   7   0   61.48    1.59
   1   7   0   58.85    1.65
  -1   7   0   60.86    1.44
   1   7   0   60.68    1.51
  -2  -7   0    0.76    0.06
  -2  -7   0    0.81    0.16
  -2  -7   0    0.79    0.17
  -2  -7   0    0.66    0.15
  -2  -7   0    0.46    0.13
   2  -7   0    0.63    0.13
   2  -7   0    0.84    0.19
  -2  -7   0    0.55    0.07
   2  -7   0    0.68    0.14
   2  -7   0    0.61    0.13
   2   7   0    0.58    0.14
  -2   7   0    0.73    0.19
   2   7   0    0.67    0.19
  -2   7   0    0.63    0.14
  -3  -7   0   12.03    0.39
   3  -7   0   11.73    0.45
  -3  -7   0   11.72    0.48
   3  -7   0   11.11    0.55
  -3  -7   0   12.10    0.51
   3  -7   0   12.00    0.48
   3  -7   0   11.20    0.59
  -3  -7   0   11.35    0.36
  -3  -7   0   12.68    0.51
   3   7   0   11.19    0.44
  -3   7   0   12.88    0.59
   3   7   0   11.36    0.60
   3   7   0   12.40    0.45
   3   7   0   10.84    0.55
  -3   7   0   12.07    0.51
   4  -7   0    0.26    0.11
   4  -7   0    0.02    0.16
  -4  -7   0    0.05    0.14
  -4  -7   0    0.02    0.12
   4  -7   0    0.12    0.11
  -4  -7   0    0.17    0.11
  -4  -7   0    0.17    0.12
   4  -7   0    0.05    0.17
   4   7   0   -0.03    0.14
  -4   7   0    0.06    0.14
   4   7   0   -0.05    0.10
   4   7   0    0.23    0.18
  -4   7   0   -0.04    0.15
  -5  -7   0    4.45    0.35
   5  -7   0    4.34    0.45
   5  -7   0    4.52    0.27
  -5  -7   0    4.33    0.34
  -5  -7   0    4.19    0.39
  -5  -7   0    3.95    0.32
   5  -7   0    4.31    0.48
   5  -7   0    4.33    0.35
   5   7   0    4.18    0.49
  -5   7   0    4.55    0.46
   5   7   0    4.42    0.46
   5   7   0    4.54    0.34
  -5   7   0    5.45    0.43
  -6  -7   0    7.05    0.47
   6  -7   0    7.28    0.49
   6  -7   0    8.83    0.59
   6  -7   0    7.07    0.57
   6  -7   0    7.27    0.36
  -6  -7   0    7.10    0.47
  -6  -7   0    7.45    0.47
  -6  -7   0    7.90    0.53
  -6   7   0    7.77    0.31
  -6   7   0    7.60    0.55
   6   7   0    9.03    0.66
   6   7   0    7.16    0.53
  -6   7   0    7.77    0.55
  -7  -7   0   -0.01    0.19
  -7  -7   0   -0.07    0.16
   7  -7   0    0.06    0.26
  -7  -7   0    0.08    0.20
  -7  -7   0   -0.15    0.17
   7  -7   0    0.07    0.23
   7  -7   0    0.18    0.13
   7  -7   0   -0.25    0.16
   7   7   0   -0.01    0.28
  -7   7   0    0.29    0.26
  -7   7   0   -0.09    0.25
   7   7   0   -0.08    0.20
  -8  -7   0   12.23    0.65
   8  -7   0   10.53    0.75
  -8  -7   0    9.72    0.68
  -8  -7   0    9.61    0.64
  -8  -7   0    9.42    0.63
   8  -7   0    9.72    0.66
   8  -7   0   10.34    0.80
  -8   7   0   10.35    0.69
   8   7   0   10.15    0.77
   8   7   0   10.74    0.81
  -8   7   0   10.66    0.76
  -9  -7   0    1.63    0.36
  -9  -7   0    1.90    0.42
  -9  -7   0    1.35    0.33
  -9  -7   0    1.79    0.36
   9  -7   0    1.59    0.48
  -9  -7   0    1.94    0.42
   9  -7   0    1.06    0.35
   9  -7   0    1.69    0.45
   9   7   0    2.08    0.48
  -9   7   0    1.58    0.45
  -9   7   0    2.06    0.46
   9   7   0    1.68    0.49
 -10  -7   0    4.74    0.64
  10  -7   0    5.21    0.72
  10  -7   0    4.49    0.60
  10  -7   0    4.26    0.68
 -10  -7   0    4.10    0.53
 -10  -7   0    5.50    0.64
 -10   7   0    4.40    0.68
  10   7   0    2.46    0.61
 -10   7   0    5.01    0.68
  10   7   0    5.29    0.72
 -11  -7   0    0.23    0.37
 -11  -7   0    0.19    0.33
  11  -7   0   -0.16    0.37
  11  -7   0    0.60    0.48
 -11  -7   0    0.16    0.43
  11   7   0    0.48    0.48
  11   7   0    0.37    0.49
 -11   7   0   -0.35    0.40
 -11   7   0    0.07    0.43
   0  -8   0    3.41    0.33
   0  -8   0    2.54    0.23
   0  -8   0    2.82    0.17
   0  -8   0    3.34    0.25
   0   8   0    2.75    0.29
   0   8   0    2.74    0.13
   0   8   0    2.87    0.34
  -1  -8   0   27.03    0.84
   1  -8   0   26.82    0.65
  -1  -8   0   27.04    0.77
   1  -8   0   27.13    0.80
   1  -8   0   26.87    0.81
  -1  -8   0   27.31    0.81
   1  -8   0   25.87    0.89
  -1  -8   0   27.06    0.88
  -1  -8   0   26.83    0.75
   1   8   0   26.95    0.83
  -1   8   0   26.00    0.89
  -1   8   0   26.40    0.72
   1   8   0   26.68    0.94
  -2  -8   0    3.31    0.28
   2  -8   0    3.26    0.34
   2  -8   0    3.90    0.27
   2  -8   0    3.50    0.26
   2  -8   0    3.74    0.26
  -2  -8   0    3.43    0.28
  -2  -8   0    3.41    0.24
  -2  -8   0    3.54    0.29
  -2   8   0    3.71    0.25
   2   8   0    3.71    0.27
  -2   8   0    3.27    0.35
   2   8   0    3.84    0.41
   3  -8   0    2.19    0.23
  -3  -8   0    1.90    0.23
  -3  -8   0    2.01    0.14
   3  -8   0    1.88    0.23
  -3  -8   0    1.83    0.15
   3  -8   0    2.15    0.30
   3   8   0    2.22    0.31
   3   8   0    1.95    0.31
   3   8   0    2.39    0.25
  -3   8   0    2.54    0.28
  -3   8   0    2.11    0.32
   4  -8   0    0.37    0.20
   4  -8   0    0.13    0.19
  -4  -8   0    0.34    0.15
  -4  -8   0    0.17    0.14
  -4  -8   0   -0.08    0.13
   4  -8   0    0.28    0.14
   4  -8   0    0.22    0.11
  -4  -8   0    0.28    0.12
  -4  -8   0    0.33    0.10
   4   8   0    0.29    0.13
   4   8   0    0.20    0.12
  -4   8   0    0.31    0.15
   4   8   0   -0.06    0.17
   4   8   0    0.15    0.19
  -4   8   0    0.34    0.19
   5  -8   0    0.33    0.22
  -5  -8   0    0.29    0.17
  -5  -8   0   -0.18    0.11
   5  -8   0    0.12    0.16
   5  -8   0    0.29    0.13
  -5  -8   0    0.14    0.16
   5  -8   0    0.28    0.21
  -5  -8   0    0.35    0.12
  -5  -8   0    0.38    0.17
   5   8   0    0.24    0.22
  -5   8   0    0.23    0.20
   5   8   0    0.03    0.18
  -5   8   0    0.01    0.15
   6  -8   0    2.91    0.24
   6  -8   0    3.12    0.43
   6  -8   0    2.77    0.44
  -6  -8   0    2.99    0.37
  -6  -8   0    2.59    0.33
   6  -8   0    2.59    0.35
  -6  -8   0    3.39    0.42
  -6  -8   0    2.99    0.34
   6   8   0    2.34    0.43
   6   8   0    2.82    0.42
  -6   8   0    3.52    0.46
  -6   8   0    2.67    0.41
  -7  -8   0    4.94    0.51
   7  -8   0    3.41    0.53
  -7  -8   0    4.15    0.45
  -7  -8   0    3.98    0.43
   7  -8   0    3.57    0.51
  -7  -8   0    3.81    0.38
   7  -8   0    4.24    0.46
  -7  -8   0    4.15    0.49
   7   8   0    3.44    0.55
   7   8   0    4.11    0.55
  -7   8   0    4.59    0.55
  -7   8   0    3.52    0.48
  -8  -8   0    1.23    0.35
   8  -8   0    1.28    0.38
   8  -8   0    0.84    0.40
   8  -8   0    1.84    0.37
  -8  -8   0    0.71    0.29
  -8  -8   0    1.05    0.26
  -8  -8   0    1.54    0.31
  -8  -8   0    0.87    0.29
   8   8   0    1.02    0.37
  -8   8   0    1.19    0.37
   8   8   0    0.90    0.37
  -8   8   0    1.21    0.35
  -9  -8   0    0.36    0.24
  -9  -8   0    0.52    0.30
   9  -8   0   -0.42    0.25
  -9  -8   0    0.53    0.24
  -9  -8   0    0.09    0.28
   9  -8   0   -0.17    0.27
   9  -8   0   -0.21    0.31
  -9  -8   0    0.55    0.27
   9   8   0    0.21    0.36
   9   8   0   -0.15    0.35
  -9   8   0   -0.12    0.28
  -9   8   0   -0.50    0.28
  10  -8   0    0.47    0.40
 -10  -8   0   -0.21    0.24
 -10  -8   0    0.24    0.27
 -10  -8   0    0.04    0.34
  10  -8   0    0.10    0.35
  10  -8   0    0.50    0.41
  10   8   0   -1.19    0.40
 -10   8   0    0.00    0.34
  10   8   0   -0.11    0.35
 -10   8   0   -0.14    0.31
  11  -8   0    0.05    0.48
 -11  -8   0   -0.10    0.31
  11  -8   0   -0.01    0.44
 -11   8   0   -0.48    0.37
  11   8   0   -0.32    0.46
  11   8   0    0.00    0.53
 -11   8   0   -0.30    0.45
   0  -9   0    0.24    0.15
   0  -9   0    0.10    0.12
   0  -9   0    0.05    0.07
   0  -9   0    0.10    0.11
   0  -9   0    0.02    0.09
   0   9   0    0.07    0.15
   0   9   0    0.13    0.05
   0   9   0    0.03    0.16
   0   9   0    0.16    0.05
  -1  -9   0   57.47    1.60
  -1  -9   0   58.25    1.43
   1  -9   0   58.81    1.32
  -1  -9   0   58.20    1.47
   1  -9   0   58.42    1.53
   1  -9   0   58.11    1.49
  -1  -9   0   59.10    1.52
   1  -9   0   58.31    1.48
  -1  -9   0   59.01    1.56
   1  -9   0   58.24    1.62
  -1   9   0   56.82    1.39
  -1   9   0   57.85    1.69
   1   9   0   57.23    1.68
  -1   9   0   58.97    1.61
   1   9   0   57.72    1.54
  -2  -9   0    0.19    0.11
   2  -9   0    0.21    0.12
  -2  -9   0    0.19    0.12
   2  -9   0    0.24    0.13
   2  -9   0    0.13    0.13
  -2  -9   0   -0.09    0.11
  -2  -9   0    0.25    0.17
   2  -9   0    0.24    0.16
  -2   9   0    0.20    0.16
   2   9   0    0.08    0.17
   2   9   0    0.11    0.14
  -2   9   0    0.40    0.13
  -3  -9   0    0.40    0.08
  -3  -9   0    0.42    0.07
   3  -9   0    0.30    0.17
  -3  -9   0    0.35    0.15
  -3  -9   0    0.26    0.14
  -3  -9   0    0.68    0.20
   3  -9   0    0.21    0.14
   3  -9   0    0.36    0.14
   3   9   0    0.42    0.15
  -3   9   0    0.34    0.13
   3   9   0    0.37    0.21
   3   9   0    0.50    0.22
  -3   9   0    0.42    0.19
  -4  -9   0    1.23    0.24
  -4  -9   0    1.47    0.25
  -4  -9   0    1.63    0.19
   4  -9   0    1.57    0.21
   4  -9   0    1.46    0.30
  -4  -9   0    1.45    0.26
   4  -9   0    1.62    0.24
  -4  -9   0    1.46    0.16
  -4   9   0    0.91    0.22
   4   9   0    1.74    0.33
   4   9   0    1.75    0.22
   4   9   0    1.19    0.33
  -4   9   0    1.44    0.30
   5  -9   0    2.84    0.41
  -5  -9   0    1.83    0.29
   5  -9   0    2.79    0.34
  -5  -9   0    3.04    0.29
   5  -9   0    2.97    0.29
  -5  -9   0    2.96    0.24
   5  -9   0    3.53    0.47
  -5  -9   0    3.20    0.39
  -5  -9   0    3.37    0.37
  -5   9   0    2.63    0.35
  -5   9   0    2.90    0.41
   5   9   0    3.39    0.44
   5   9   0    2.46    0.44
  -6  -9   0    7.77    0.58
   6  -9   0    8.83    0.67
   6  -9   0    9.79    0.59
  -6  -9   0    8.42    0.42
   6  -9   0    9.44    0.43
  -6  -9   0    7.37    0.50
  -6  -9   0    8.26    0.47
  -6  -9   0    8.78    0.53
   6  -9   0    8.45    0.63
   6   9   0    7.77    0.65
  -6   9   0    8.47    0.62
   6   9   0    7.63    0.63
  -6   9   0    9.05    0.60
  -7  -9   0    0.16    0.19
  -7  -9   0    0.89    0.27
  -7  -9   0    0.35    0.27
   7  -9   0    0.45    0.24
   7  -9   0    0.49    0.28
  -7  -9   0    0.44    0.24
  -7  -9   0    0.66    0.19
   7  -9   0   -0.07    0.27
  -7   9   0    0.98    0.35
  -7   9   0    0.49    0.30
   7   9   0    0.58    0.33
   7   9   0    0.78    0.29
  -8  -9   0    4.32    0.43
  -8  -9   0    5.23    0.51
   8  -9   0    4.06    0.57
   8  -9   0    4.62    0.55
  -8  -9   0    4.40    0.53
  -8  -9   0    4.92    0.54
   8  -9   0    4.43    0.63
  -8  -9   0    4.54    0.51
  -8   9   0    5.09    0.65
   8   9   0    3.84    0.62
   8   9   0    4.21    0.60
  -8   9   0    4.05    0.61
   9  -9   0    0.58    0.33
  -9  -9   0    0.72    0.29
   9  -9   0    0.88    0.42
   9  -9   0    1.33    0.46
  -9  -9   0    1.59    0.34
  -9  -9   0    0.67    0.31
  -9  -9   0    1.27    0.41
  -9  -9   0    0.32    0.26
  -9   9   0    0.45    0.34
   9   9   0    0.41    0.36
  -9   9   0    0.81    0.36
   9   9   0    1.01    0.45
  10  -9   0    1.71    0.51
  10  -9   0    1.19    0.45
  10  -9   0    1.31    0.45
 -10  -9   0    1.16    0.37
 -10   9   0    0.83    0.48
  10   9   0    1.10    0.50
  10   9   0    1.55    0.58
 -10   9   0    1.62    0.53
 -11  -9   0    1.46    0.49
  11  -9   0    2.02    0.63
  11  -9   0    0.95    0.45
  11   9   0    1.19    0.61
  11   9   0    1.17    0.58
 -11   9   0    2.99    0.63
 -11   9   0    1.27    0.57
   0 -10   0    1.80    0.24
   0 -10   0    2.07    0.28
   0 -10   0    1.70    0.22
   0 -10   0    1.69    0.17
   0 -10   0    1.81    0.21
   0  10   0    1.93    0.11
   0  10   0    1.84    0.27
   0  10   0    1.79    0.10
   0  10   0    1.59    0.29
   1 -10   0    4.36    0.32
  -1 -10   0    4.31    0.33
   1 -10   0    4.49    0.31
   1 -10   0    4.74    0.33
  -1 -10   0    4.50    0.27
  -1 -10   0    4.88    0.39
  -1 -10   0    4.41    0.33
  -1 -10   0    5.13    0.34
   1 -10   0    5.14    0.40
   1 -10   0    4.75    0.21
  -1  10   0    5.12    0.40
   1  10   0    4.74    0.47
  -1  10   0    4.94    0.48
   1  10   0    4.96    0.37
  -1  10   0    5.20    0.25
  -2 -10   0    8.47    0.39
   2 -10   0    8.10    0.44
  -2 -10   0    8.17    0.48
   2 -10   0    6.96    0.40
  -2 -10   0    7.12    0.43
   2 -10   0    7.12    0.41
   2 -10   0    6.90    0.48
  -2 -10   0    7.33    0.43
  -2  10   0    7.26    0.36
  -2  10   0    7.46    0.50
   2  10   0    6.77    0.51
   2  10   0    8.01    0.45
   3 -10   0    0.07    0.12
   3 -10   0    0.15    0.17
   3 -10   0    0.01    0.13
  -3 -10   0    0.13    0.11
  -3 -10   0    0.09    0.15
  -3 -10   0    0.04    0.16
   3  10   0   -0.03    0.19
   3  10   0   -0.05    0.14
  -3  10   0   -0.05    0.13
   3  10   0    0.24    0.21
  -3  10   0   -0.01    0.17
   4 -10   0    4.12    0.31
  -4 -10   0    4.59    0.24
  -4 -10   0    4.73    0.38
   4 -10   0    4.44    0.48
   4 -10   0    4.98    0.39
  -4 -10   0    3.87    0.38
  -4 -10   0    4.94    0.38
  -4 -10   0    4.46    0.22
   4  10   0    4.34    0.33
  -4  10   0    4.85    0.45
  -4  10   0    4.17    0.50
   4  10   0    5.06    0.52
   4  10   0    5.10    0.56
  -5 -10   0    4.06    0.26
   5 -10   0    4.91    0.46
   5 -10   0    4.09    0.32
  -5 -10   0    4.10    0.43
  -5 -10   0    3.76    0.28
  -5 -10   0    3.82    0.42
   5 -10   0    3.71    0.46
  -5 -10   0    3.97    0.42
   5  10   0    4.86    0.59
   5  10   0    3.44    0.48
  -5  10   0    3.32    0.41
  -5  10   0    3.97    0.49
   6 -10   0   11.55    0.66
   6 -10   0    9.58    0.73
  -6 -10   0   10.54    0.61
   6 -10   0   11.60    0.73
  -6 -10   0    9.70    0.51
   6 -10   0   10.96    0.50
  -6 -10   0   10.96    0.66
  -6 -10   0    9.99    0.62
  -6 -10   0   10.34    0.47
  -6  10   0    9.53    0.69
   6  10   0    9.39    0.74
  -6  10   0   11.58    0.70
   6  10   0   10.48    0.69
   7 -10   0    0.31    0.34
  -7 -10   0    0.93    0.30
   7 -10   0    0.23    0.28
  -7 -10   0    0.33    0.26
  -7 -10   0    1.13    0.30
  -7 -10   0    0.38    0.21
  -7 -10   0    0.57    0.18
   7 -10   0    0.52    0.27
   7  10   0    0.01    0.26
  -7  10   0   -0.07    0.25
   7  10   0    0.64    0.40
  -7  10   0    0.52    0.36
   8 -10   0    1.67    0.37
   8 -10   0    2.17    0.49
   8 -10   0    1.38    0.46
  -8 -10   0    2.23    0.40
  -8 -10   0    1.88    0.39
  -8 -10   0    2.45    0.44
   8  10   0    1.55    0.49
  -8  10   0    1.99    0.48
   8  10   0    1.94    0.47
  -8  10   0    1.97    0.45
   9 -10   0    2.95    0.59
  -9 -10   0    3.18    0.56
   9 -10   0    2.96    0.53
   9 -10   0    3.23    0.61
  -9 -10   0    2.71    0.48
  -9 -10   0    2.39    0.43
  -9  10   0    2.49    0.53
   9  10   0    1.88    0.50
   9  10   0    3.08    0.67
  -9  10   0    3.10    0.59
  10 -10   0    1.11    0.47
 -10 -10   0    0.38    0.32
  10 -10   0    0.59    0.45
  10 -10   0    0.54    0.42
  10  10   0    0.55    0.48
  10  10   0    0.52    0.43
 -10  10   0    0.34    0.42
 -10  10   0    0.09    0.41
   1 -11   0   11.34    0.53
   1 -11   0   11.97    0.38
  -1 -11   0   11.76    0.57
   1 -11   0   12.40    0.55
  -1 -11   0   12.53    0.62
  -1 -11   0   12.49    0.48
   1 -11   0   11.84    0.52
  -1 -11   0   12.05    0.55
   1 -11   0   11.44    0.61
   1  11   0   11.85    0.66
  -1  11   0   11.84    0.67
  -1  11   0   11.36    0.41
  -1  11   0   12.03    0.64
   1  11   0   11.26    0.58
  -2 -11   0    5.39    0.34
  -2 -11   0    5.27    0.39
   2 -11   0    5.21    0.38
   2 -11   0    5.14    0.36
  -2 -11   0    5.29    0.41
   2 -11   0    5.81    0.45
  -2 -11   0    4.62    0.37
  -2  11   0    4.78    0.31
   2  11   0    4.93    0.38
   2  11   0    5.66    0.57
  -2  11   0    6.45    0.50
  -3 -11   0    0.25    0.17
   3 -11   0    0.13    0.15
   3 -11   0    0.24    0.22
   3 -11   0    0.26    0.15
  -3 -11   0    0.26    0.16
  -3 -11   0    0.23    0.19
  -3  11   0    0.03    0.20
   3  11   0    0.28    0.24
  -3  11   0    0.14    0.15
   3  11   0    0.09    0.18
  -4 -11   0   15.66    0.71
   4 -11   0   14.58    0.67
   4 -11   0   15.22    0.63
  -4 -11   0   14.26    0.65
  -4 -11   0   15.13    0.71
   4 -11   0   14.80    0.78
   4  11   0   13.38    0.83
   4  11   0   13.92    0.59
  -4  11   0   14.05    0.65
   4  11   0   13.20    0.75
  -4  11   0   15.59    0.81
   5 -11   0    1.26    0.22
   5 -11   0    0.47    0.26
  -5 -11   0    1.13    0.27
   5 -11   0    0.74    0.24
  -5 -11   0    0.46    0.22
  -5 -11   0    0.75    0.27
   5  11   0    0.75    0.32
   5  11   0    0.95    0.30
  -5  11   0    1.01    0.27
  -5  11   0    0.30    0.26
  -6 -11   0    1.87    0.36
   6 -11   0    2.69    0.40
  -6 -11   0    2.38    0.39
   6 -11   0    2.00    0.27
  -6 -11   0    2.25    0.36
   6 -11   0    1.58    0.37
  -6  11   0    1.67    0.39
   6  11   0    1.77    0.39
   6  11   0    1.81    0.44
  -6  11   0    1.71    0.36
  -7 -11   0    0.41    0.25
   7 -11   0    0.13    0.24
  -7 -11   0   -0.08    0.26
   7 -11   0   -0.16    0.28
  -7 -11   0    0.26    0.23
   7 -11   0    0.47    0.35
  -7  11   0   -0.21    0.25
   7  11   0    0.28    0.32
  -7  11   0    0.07    0.30
   7  11   0    0.22    0.28
   8 -11   0    4.01    0.61
  -8 -11   0    2.67    0.49
  -8 -11   0    4.01    0.51
   8 -11   0    4.58    0.68
   8 -11   0    3.93    0.52
  -8 -11   0    4.92    0.56
  -8  11   0    3.05    0.58
   8  11   0    3.47    0.66
   8  11   0    2.68    0.55
  -8  11   0    3.82    0.57
   9 -11   0    0.03    0.32
  -9 -11   0    0.02    0.25
   9 -11   0   -0.24    0.37
   9 -11   0   -0.15    0.35
  -9 -11   0   -0.14    0.37
  -9 -11   0   -0.01    0.25
   9  11   0   -0.44    0.39
   9  11   0   -0.33    0.37
  -9  11   0   -0.53    0.32
  -9  11   0    0.12    0.35
  10 -11   0    0.15    0.39
  10 -11   0    0.22    0.45
  10 -11   0   -0.60    0.42
 -10 -11   0    0.09    0.33
 -10  11   0   -0.06    0.41
 -10  11   0   -0.39    0.40
  10  11   0    0.03    0.46
  10  11   0    0.17    0.47
   0 -12   0    5.69    0.30
   0 -12   0    7.92    0.52
  -1 -12   0    0.12    0.16
   1 -12   0    0.27    0.15
   1 -12   0    0.27    0.17
  -1 -12   0   -0.01    0.15
  -1 -12   0    0.53    0.22
   1 -12   0    0.18    0.18
   1 -12   0    0.17    0.08
  -1 -12   0    0.08    0.11
  -1  12   0    0.10    0.10
  -1  12   0   -0.16    0.18
  -1  12   0    0.09    0.08
   1  12   0    0.30    0.21
   1  12   0    0.25    0.21
  -1  12   0    0.07    0.20
   2 -12   0    0.16    0.16
  -2 -12   0    0.17    0.16
   2 -12   0    0.26    0.21
  -2 -12   0    0.12    0.14
   2 -12   0    0.14    0.15
  -2 -12   0    0.03    0.15
  -2 -12   0    0.65    0.24
   2  12   0    0.00    0.20
  -2  12   0    0.04    0.20
  -2  12   0    0.24    0.25
  -2  12   0    0.27    0.14
   2  12   0    0.21    0.18
  -3 -12   0    2.91    0.42
  -3 -12   0    5.06    0.37
   3 -12   0    3.55    0.38
  -3 -12   0    3.48    0.38
   3 -12   0    4.32    0.36
   3  12   0    3.06    0.37
   3  12   0    3.41    0.51
  -3  12   0    3.70    0.47
  -3  12   0    3.72    0.36
  -4 -12   0    9.37    0.58
   4 -12   0    9.24    0.49
   4 -12   0    9.43    0.57
  -4 -12   0    9.90    0.59
   4 -12   0    9.39    0.66
  -4 -12   0    8.09    0.50
   4  12   0    8.95    0.70
   4  12   0    8.75    0.50
  -4  12   0    7.99    0.51
   4  12   0    7.80    0.61
  -4  12   0    9.18    0.66
   5 -12   0    6.86    0.42
  -5 -12   0    6.27    0.48
   5 -12   0    6.65    0.66
  -5 -12   0    6.32    0.53
   5 -12   0    7.31    0.55
  -5 -12   0    7.07    0.56
   5  12   0    6.21    0.64
  -5  12   0    6.72    0.53
   5  12   0    6.72    0.73
  -5  12   0    6.33    0.67
   6 -12   0    0.61    0.18
  -6 -12   0    0.14    0.25
   6 -12   0    0.42    0.25
   6 -12   0    0.88    0.36
  -6 -12   0    1.13    0.30
  -6 -12   0    0.15    0.24
  -6  12   0    0.44    0.31
  -6  12   0    0.32    0.29
   6  12   0    0.68    0.36
   6  12   0    0.32    0.28
   7 -12   0    0.25    0.27
  -7 -12   0    0.15    0.22
  -7 -12   0   -0.01    0.28
  -7 -12   0   -0.15    0.21
   7 -12   0   -0.32    0.25
   7  12   0    0.10    0.31
  -7  12   0    0.27    0.25
   7  12   0    0.40    0.34
  -7  12   0   -0.48    0.30
   8 -12   0   -0.17    0.30
  -8 -12   0    0.22    0.31
  -8 -12   0    0.02    0.23
   8 -12   0    0.20    0.32
  -8 -12   0   -0.06    0.22
  -8  12   0   -0.69    0.27
   8  12   0    0.38    0.39
   8  12   0    0.17    0.35
  -8  12   0    0.01    0.29
   9 -12   0    0.96    0.44
   9 -12   0    1.33    0.49
  -9 -12   0    2.23    0.51
  -9 -12   0    1.91    0.41
  -9 -12   0    1.87    0.43
  -9  12   0    1.77    0.57
  -9  12   0    1.93    0.51
   9  12   0    1.00    0.57
   9  12   0    1.06    0.43
 -10 -12   0    0.40    0.35
  10 -12   0    0.68    0.46
 -10 -12   0    1.00    0.41
  10 -12   0   -0.21    0.40
  10  12   0    0.52    0.54
 -10  12   0    1.53    0.61
 -10  12   0    0.76    0.50
  10  12   0    0.76    0.51
   1 -13   0   15.46    0.49
  -1 -13   0   15.11    0.71
  -1 -13   0   16.17    0.60
   1 -13   0   15.59    0.79
  -1 -13   0   17.94    0.74
   1 -13   0   16.61    0.70
   1 -13   0   15.12    0.69
  -1 -13   0   16.09    0.77
   1  13   0   17.24    0.78
  -1  13   0   15.19    0.84
  -1  13   0   16.21    0.54
  -1  13   0   16.19    0.80
  -1  13   0   15.75    0.49
   1  13   0   15.86    0.88
   2 -13   0    8.22    0.51
   2 -13   0    8.76    0.53
   2 -13   0    8.58    0.61
  -2 -13   0    8.59    0.54
  -2 -13   0    9.45    0.56
  -2 -13   0    9.69    0.48
  -2 -13   0    9.11    0.59
  -2  13   0    8.86    0.42
  -2  13   0    9.22    0.66
   2  13   0    8.41    0.65
   2  13   0    7.64    0.53
  -2  13   0    9.24    0.65
  -3 -13   0   17.99    0.86
   3 -13   0   18.56    0.78
  -3 -13   0   17.82    0.79
   3 -13   0   16.49    0.71
   3 -13   0   16.07    0.86
  -3 -13   0   16.90    0.71
  -3  13   0   16.84    0.90
   3  13   0   15.99    0.92
  -3  13   0   16.44    0.68
   3  13   0   17.47    0.77
  -4 -13   0    8.02    0.57
  -4 -13   0    8.38    0.53
  -4 -13   0    7.79    0.56
   4 -13   0    7.46    0.63
   4 -13   0    7.20    0.54
   4 -13   0    7.41    0.48
   4  13   0    8.20    0.69
  -4  13   0    8.18    0.52
   4  13   0    8.03    0.50
   4  13   0    8.32    0.63
  -4  13   0    9.03    0.67
   5 -13   0    6.24    0.44
   5 -13   0    6.33    0.68
  -5 -13   0    5.83    0.57
  -5 -13   0    6.96    0.52
  -5 -13   0    6.76    0.60
   5 -13   0    6.76    0.56
   5  13   0    6.04    0.66
   5  13   0    5.49    0.68
  -5  13   0    5.49    0.66
  -5  13   0    6.18    0.51
   6 -13   0    5.03    0.64
   6 -13   0    6.01    0.60
   6 -13   0    4.95    0.39
  -6 -13   0    4.84    0.53
  -6 -13   0    5.78    0.59
  -6 -13   0    5.70    0.60
   6  13   0    5.27    0.63
  -6  13   0    5.42    0.58
  -6  13   0    5.42    0.70
   6  13   0    4.92    0.68
   7 -13   0    0.03    0.34
  -7 -13   0    0.99    0.31
   7 -13   0    0.65    0.32
  -7 -13   0    1.19    0.35
  -7 -13   0    1.20    0.39
  -7  13   0    0.93    0.41
  -7  13   0    1.64    0.42
   7  13   0    0.97    0.44
   7  13   0    1.06    0.47
  -8 -13   0    1.22    0.43
   8 -13   0    0.82    0.37
  -8 -13   0    0.98    0.34
   8 -13   0    0.09    0.38
  -8 -13   0    0.60    0.31
   8  13   0    0.52    0.49
  -8  13   0   -0.16    0.30
   8  13   0    0.59    0.38
  -8  13   0    0.61    0.43
  -9 -13   0    1.36    0.40
   9 -13   0    0.67    0.39
   9 -13   0    0.85    0.49
  -9 -13   0    0.93    0.39
  -9 -13   0    0.79    0.41
   9  13   0    0.67    0.44
  -9  13   0    0.69    0.47
  -9  13   0    1.05    0.51
   9  13   0    0.81    0.54
   0 -14   0    3.38    0.26
   0 -14   0    3.58    0.40
   0 -14   0    3.62    0.39
   0 -14   0    3.82    0.45
   0  14   0    3.05    0.46
   0  14   0    2.78    0.42
  -1 -14   0    0.75    0.28
  -1 -14   0    0.22    0.14
  -1 -14   0    0.33    0.20
   1 -14   0   -0.04    0.17
  -1 -14   0    0.41    0.21
   1 -14   0    0.72    0.26
   1 -14   0   -0.06    0.18
  -1  14   0    0.26    0.25
   1  14   0    0.26    0.23
   1  14   0    0.20    0.25
  -1  14   0    0.27    0.24
   2 -14   0    6.21    0.49
  -2 -14   0    6.48    0.61
   2 -14   0    6.39    0.48
  -2 -14   0    6.16    0.41
  -2 -14   0    5.87    0.48
   2 -14   0    5.68    0.58
  -2 -14   0    7.05    0.52
   2  14   0    6.19    0.50
  -2  14   0    6.24    0.65
  -2  14   0    6.41    0.67
   2  14   0    6.60    0.69
  -3 -14   0    4.06    0.40
   3 -14   0    4.08    0.43
  -3 -14   0    4.45    0.47
   3 -14   0    3.18    0.46
  -3 -14   0    4.59    0.54
   3 -14   0    3.84    0.44
  -3  14   0    3.85    0.38
   3  14   0    5.16    0.63
  -3  14   0    3.49    0.53
   3  14   0    4.57    0.48
  -3  14   0    4.03    0.54
  -4 -14   0   -0.07    0.17
   4 -14   0    0.27    0.18
  -4 -14   0   -0.16    0.19
   4 -14   0   -0.06    0.25
  -4 -14   0   -0.03    0.21
   4 -14   0    0.09    0.22
  -4  14   0   -0.04    0.22
   4  14   0    0.15    0.25
   4  14   0    0.07    0.22
  -4  14   0    0.00    0.24
   4  14   0    0.08    0.32
  -5 -14   0    2.31    0.40
   5 -14   0    1.69    0.41
  -5 -14   0    3.47    0.48
   5 -14   0    2.64    0.35
   5 -14   0    3.02    0.43
  -5 -14   0    1.48    0.33
   5  14   0    2.37    0.45
  -5  14   0    2.14    0.47
  -5  14   0    2.33    0.41
   5  14   0    1.65    0.48
  -6 -14   0    0.83    0.33
   6 -14   0    0.68    0.23
   6 -14   0    0.99    0.38
   6 -14   0    0.07    0.27
  -6 -14   0    0.43    0.27
  -6 -14   0    0.47    0.25
  -6  14   0    1.26    0.42
   6  14   0    0.73    0.41
  -6  14   0    0.68    0.33
   6  14   0    1.28    0.38
   7 -14   0    0.53    0.37
  -7 -14   0    1.84    0.42
  -7 -14   0    1.43    0.43
   7 -14   0    1.26    0.38
  -7 -14   0    1.80    0.40
  -7  14   0    1.63    0.43
   7  14   0    1.27    0.50
   7  14   0    2.13    0.52
  -7  14   0    1.37    0.50
   8 -14   0    2.82    0.53
   8 -14   0    3.79    0.62
  -8 -14   0    2.66    0.48
  -8 -14   0    3.52    0.60
  -8 -14   0    3.33    0.51
  -8  14   0    4.06    0.65
   8  14   0    3.07    0.60
  -8  14   0    3.75    0.70
   8  14   0    2.36    0.62
   9 -14   0    0.06    0.37
   9 -14   0   -0.01    0.43
  -9 -14   0    0.13    0.41
  -9 -14   0   -0.10    0.28
  -9 -14   0    0.33    0.34
   9  14   0   -0.07    0.38
  -9  14   0    1.21    0.49
  -9  14   0   -0.49    0.37
   9  14   0    0.61    0.55
   0 -15   0    0.61    0.25
   0 -15   0    1.09    0.29
   0  15   0    1.45    0.38
   0  15   0    0.93    0.29
   1 -15   0    2.33    0.35
  -1 -15   0    2.78    0.38
  -1 -15   0    1.63    0.31
   1 -15   0    2.34    0.34
  -1 -15   0    2.45    0.28
   1 -15   0    3.08    0.45
  -1 -15   0    2.58    0.44
   1  15   0    2.12    0.46
  -1  15   0    2.17    0.44
   1  15   0    2.96    0.44
  -1  15   0    2.90    0.48
  -2 -15   0   16.23    0.68
   2 -15   0   15.73    0.89
   2 -15   0   17.56    0.80
  -2 -15   0   16.66    0.89
  -2 -15   0   16.61    0.81
  -2 -15   0   16.74    0.82
   2 -15   0   15.37    0.76
  -2  15   0   17.65    0.99
  -2  15   0   17.19    0.94
   2  15   0   15.76    0.80
   2  15   0   17.29    0.99
   3 -15   0    6.51    0.57
  -3 -15   0    6.53    0.46
   3 -15   0    6.22    0.47
  -3 -15   0    5.85    0.57
  -3 -15   0    6.11    0.60
  -3 -15   0    6.00    0.63
   3 -15   0    6.15    0.64
  -3  15   0    7.09    0.76
   3  15   0    6.45    0.59
  -3  15   0    7.47    0.74
   3  15   0    5.17    0.67
   4 -15   0    0.02    0.23
   4 -15   0    0.44    0.23
  -4 -15   0    0.18    0.23
  -4 -15   0    0.13    0.23
   4 -15   0    0.36    0.28
  -4 -15   0    0.37    0.20
  -4  15   0    0.80    0.26
   4  15   0    0.44    0.28
  -4  15   0    0.61    0.31
   4  15   0   -0.07    0.29
  -5 -15   0   15.06    0.78
   5 -15   0   14.23    0.71
  -5 -15   0   15.11    0.87
   5 -15   0   14.59    0.83
  -5 -15   0   14.43    0.85
   5  15   0   15.79    0.98
   5  15   0   17.18    1.10
  -5  15   0   14.03    0.77
  -5  15   0   13.83    0.95
  -6 -15   0    0.22    0.30
   6 -15   0    0.17    0.22
  -6 -15   0   -0.08    0.29
   6 -15   0    0.87    0.39
   6 -15   0    0.20    0.29
  -6 -15   0    0.56    0.26
   6  15   0    0.10    0.30
   6  15   0    0.46    0.36
  -6  15   0    0.56    0.31
  -6  15   0   -0.39    0.27
   7 -15   0   -0.08    0.32
  -7 -15   0    0.20    0.33
  -7 -15   0    0.74    0.36
   7 -15   0    0.00    0.35
  -7 -15   0   -0.02    0.24
   7  15   0   -0.31    0.35
   7  15   0    0.37    0.36
  -7  15   0    0.01    0.32
  -7  15   0   -0.22    0.36
   8 -15   0    2.42    0.54
  -8 -15   0    1.96    0.44
   8 -15   0    2.64    0.61
  -8 -15   0    3.55    0.59
  -8 -15   0    3.14    0.53
  -8  15   0    2.84    0.54
  -8  15   0    2.71    0.63
   8  15   0    2.78    0.55
   8  15   0    2.35    0.62
   0 -16   0    2.81    0.40
   0 -16   0    2.80    0.45
   0 -16   0    3.90    0.47
   0  16   0    3.56    0.55
   0  16   0    3.25    0.50
  -1 -16   0    1.70    0.42
  -1 -16   0    1.14    0.30
  -1 -16   0    1.33    0.24
  -1 -16   0    0.90    0.28
   1 -16   0    2.02    0.36
   1 -16   0    1.54    0.32
   1 -16   0    1.27    0.37
  -1  16   0    0.85    0.35
   1  16   0    1.06    0.39
   1  16   0    0.91    0.35
  -1  16   0    1.47    0.38
   2 -16   0    9.53    0.61
  -2 -16   0   10.71    0.68
  -2 -16   0   10.23    0.67
   2 -16   0    9.51    0.64
  -2 -16   0   10.39    0.74
   2 -16   0    9.66    0.73
  -2 -16   0   10.79    0.55
   2  16   0   10.59    0.82
   2  16   0   10.98    0.72
  -2  16   0    9.72    0.76
  -2  16   0    9.99    0.79
   3 -16   0    0.15    0.24
   3 -16   0   -0.26    0.20
  -3 -16   0   -0.01    0.22
  -3 -16   0    0.11    0.23
   3 -16   0   -0.20    0.16
  -3 -16   0   -0.07    0.16
  -3 -16   0    0.03    0.29
  -3  16   0    0.05    0.28
   3  16   0    0.17    0.28
  -3  16   0   -0.06    0.28
   3  16   0   -0.10    0.25
   4 -16   0    1.68    0.32
   4 -16   0    2.54    0.48
  -4 -16   0    1.06    0.27
  -4 -16   0    2.62    0.43
  -4 -16   0    2.03    0.39
   4 -16   0    2.43    0.40
  -4  16   0    1.59    0.45
   4  16   0    2.61    0.49
   4  16   0    3.22    0.60
  -4  16   0    1.44    0.46
  -5 -16   0    0.03    0.27
   5 -16   0    0.08    0.21
   5 -16   0    0.16    0.30
  -5 -16   0   -0.25    0.26
  -5 -16   0    0.47    0.24
   5 -16   0    0.14    0.26
   5  16   0    0.09    0.34
  -5  16   0   -0.40    0.31
   5  16   0   -0.08    0.34
  -6 -16   0   -0.13    0.31
  -6 -16   0   -0.27    0.25
  -6 -16   0   -0.18    0.24
   6 -16   0    0.37    0.32
   6  16   0   -0.23    0.28
   6  16   0    0.00    0.33
  -6  16   0    0.00    0.38
  -6  16   0    0.11    0.33
  -6  16   0   -0.10    0.24
  -7 -16   0    1.08    0.39
  -7 -16   0    0.71    0.41
   7 -16   0    0.88    0.46
   7 -16   0    0.97    0.41
  -7 -16   0    0.29    0.29
   7  16   0   -0.09    0.47
   7  16   0    0.78    0.41
  -7  16   0    1.18    0.51
  -7  16   0   -0.10    0.36
  -7  16   0    0.68    0.32
  -8 -16   0    0.52    0.40
   8 -16   0    0.51    0.43
  -8 -16   0    0.48    0.38
   8 -16   0    0.36    0.43
  -8 -16   0    0.19    0.34
  -8  16   0    1.03    0.51
   8  16   0    0.02    0.44
  -8  16   0    0.33    0.34
  -8  16   0    0.42    0.45
   8  16   0   -0.22    0.41
   0 -17   0    0.27    0.25
   0 -17   0   -0.08    0.25
   0 -17   0    0.09    0.21
   0  17   0    0.18    0.28
   0  17   0   -0.24    0.30
  -1 -17   0    5.10    0.62
   1 -17   0    5.52    0.56
   1 -17   0    5.91    0.59
  -1 -17   0    4.75    0.51
   1 -17   0    5.80    0.65
  -1 -17   0    4.79    0.55
   1  17   0    4.64    0.68
  -1  17   0    5.48    0.69
   1  17   0    4.47    0.58
  -1  17   0    6.85    0.72
   2 -17   0    2.23    0.37
   2 -17   0    2.95    0.45
   2 -17   0    3.02    0.50
  -2 -17   0    3.31    0.38
  -2 -17   0    3.23    0.51
  -2 -17   0    3.08    0.44
  -2  17   0    2.35    0.50
  -2  17   0    3.23    0.56
   2  17   0    3.46    0.49
   2  17   0    3.09    0.57
  -3 -17   0    6.30    0.65
  -3 -17   0    4.92    0.56
   3 -17   0    5.62    0.58
   3 -17   0    5.44    0.55
  -3 -17   0    4.96    0.64
   3 -17   0    7.00    0.75
  -3 -17   0    6.18    0.47
  -3  17   0    5.07    0.70
   3  17   0    5.76    0.77
   3  17   0    5.37    0.62
  -3  17   0    4.95    0.69
   4 -17   0    0.85    0.32
   4 -17   0    0.87    0.29
  -4 -17   0    0.47    0.26
  -4 -17   0    0.72    0.32
   4 -17   0    0.81    0.36
  -4 -17   0    0.69    0.32
   4  17   0    0.36    0.31
  -4  17   0    0.17    0.36
   4  17   0    0.60    0.41
  -4  17   0    0.32    0.40
   5 -17   0    0.78    0.38
  -5 -17   0    0.92    0.34
   5 -17   0    0.55    0.28
  -5 -17   0    1.70    0.42
   5 -17   0    1.95    0.43
  -5 -17   0   -0.08    0.30
   5  17   0    1.21    0.47
  -5  17   0    0.33    0.36
   5  17   0    1.21    0.46
  -5  17   0    0.26    0.38
  -6 -17   0    2.28    0.52
  -6 -17   0    1.65    0.39
   6 -17   0    2.12    0.48
   6 -17   0    2.78    0.59
  -6 -17   0    2.38    0.50
   6  17   0    2.20    0.57
   6  17   0    1.18    0.44
  -6  17   0    1.72    0.52
  -7 -17   0    1.40    0.47
  -7 -17   0    1.33    0.41
  -7 -17   0    1.34    0.45
   7 -17   0    1.33    0.45
   7  17   0    1.06    0.57
  -7  17   0    1.57    0.53
   7  17   0    1.39    0.50
   0 -18   0    0.63    0.28
   0 -18   0    0.95    0.32
   0 -18   0    1.08    0.34
   0  18   0    0.31    0.33
   0  18   0    1.16    0.37
  -1 -18   0    0.29    0.27
   1 -18   0   -0.20    0.22
   1 -18   0    0.32    0.25
  -1 -18   0   -0.12    0.25
   1 -18   0   -0.24    0.28
  -1 -18   0    0.24    0.29
   1  18   0   -0.13    0.30
  -1  18   0    0.43    0.37
   1  18   0    0.37    0.37
  -1  18   0    0.06    0.35
  -2 -18   0    0.92    0.34
  -2 -18   0   -0.34    0.18
   2 -18   0    0.05    0.25
   2 -18   0    0.04    0.29
   2 -18   0   -0.16    0.24
  -2 -18   0    0.06    0.26
  -2  18   0    0.21    0.33
   2  18   0    0.21    0.33
  -2  18   0   -0.01    0.32
   2  18   0    0.44    0.35
   3 -18   0    0.13    0.29
  -3 -18   0   -0.33    0.30
  -3 -18   0    0.59    0.23
   3 -18   0    0.01    0.21
  -3 -18   0    0.42    0.29
   3 -18   0   -0.22    0.32
  -3 -18   0    0.55    0.31
  -3  18   0    0.23    0.34
   3  18   0    0.60    0.41
  -3  18   0    0.44    0.36
  -4 -18   0   -0.50    0.21
   4 -18   0    0.29    0.25
  -4 -18   0    0.10    0.30
  -4 -18   0    0.10    0.30
   4 -18   0   -0.47    0.27
   4 -18   0    0.01    0.31
   4  18   0    0.27    0.37
   4  18   0    0.46    0.39
  -4  18   0    0.40    0.39
  -4  18   0   -0.24    0.34
   5 -18   0    0.10    0.25
  -5 -18   0    0.02    0.33
   5 -18   0   -0.14    0.32
  -5 -18   0    0.36    0.29
  -5 -18   0    0.13    0.33
   5 -18   0   -0.47    0.29
  -5  18   0    0.31    0.39
   5  18   0   -0.16    0.33
   5  18   0   -0.24    0.37
  -5  18   0    0.23    0.37
  -6 -18   0   -0.32    0.34
  -6 -18   0   -0.05    0.30
   6 -18   0    0.44    0.37
   6 -18   0    0.46    0.36
  -6 -18   0    0.41    0.37
   6  18   0   -0.05    0.36
  -6  18   0    0.41    0.43
   6  18   0   -0.62    0.35
  -6  18   0   -0.23    0.36
   7 -18   0    1.86    0.57
  -7 -18   0    3.14    0.60
  -7 -18   0    1.86    0.47
  -7 -18   0    2.27    0.51
   7 -18   0    1.90    0.54
   7  18   0    0.67    0.48
  -7  18   0    1.49    0.57
   7  18   0    1.86    0.52
   0 -19   0    0.07    0.23
   0 -19   0    0.02    0.26
   0 -19   0   -0.13    0.26
   0  19   0   -0.29    0.37
   0  19   0    0.14    0.34
   1 -19   0    0.90    0.33
   1 -19   0    0.83    0.37
  -1 -19   0    1.12    0.39
  -1 -19   0    0.44    0.29
   1 -19   0    0.58    0.30
  -1 -19   0    0.60    0.32
  -1  19   0    0.48    0.39
   1  19   0    0.95    0.42
   1  19   0    0.43    0.37
  -1  19   0    0.45    0.38
  -2 -19   0    2.31    0.44
   2 -19   0    2.27    0.45
  -2 -19   0    2.39    0.46
   2 -19   0    2.37    0.42
  -2 -19   0    2.31    0.48
   2 -19   0    2.48    0.55
  -2  19   0    2.70    0.60
   2  19   0    1.95    0.52
  -2  19   0    2.86    0.57
   2  19   0    2.61    0.56
   3 -19   0    0.88    0.36
  -3 -19   0    0.83    0.37
  -3 -19   0    0.41    0.25
   3 -19   0    0.43    0.37
  -3 -19   0    0.70    0.41
   3 -19   0    0.31    0.25
  -3 -19   0    0.24    0.32
  -3  19   0    1.28    0.46
  -3  19   0    0.97    0.44
   3  19   0    1.04    0.44
  -4 -19   0    1.48    0.35
   4 -19   0    2.19    0.52
  -4 -19   0    1.87    0.45
   4 -19   0    1.17    0.37
   4 -19   0    1.10    0.36
  -4 -19   0    1.61    0.43
  -4  19   0    0.93    0.48
  -4  19   0    2.37    0.55
   4  19   0    1.10    0.44
   4  19   0    1.67    0.57
  -5 -19   0    9.62    0.88
   5 -19   0    7.17    0.66
  -5 -19   0    7.35    0.69
  -5 -19   0    7.91    0.85
   5 -19   0    8.89    0.83
   5 -19   0    7.94    0.91
   5  19   0    5.71    0.87
   5  19   0    6.66    0.88
  -5  19   0    7.43    0.96
  -5  19   0    7.59    0.92
  -6 -19   0    1.78    0.45
   6 -19   0    3.75    0.58
  -6 -19   0    2.03    0.54
   6 -19   0    2.08    0.50
  -6 -19   0    1.51    0.47
  -6  19   0    1.60    0.62
   6  19   0    1.26    0.51
   6  19   0    1.53    0.55
  -6  19   0    2.37    0.70
   0 -20   0   11.48    0.90
   0 -20   0   11.78    0.85
   0 -20   0   13.58    0.87
   0  20   0   13.58    0.94
   0  20   0    9.30    1.02
   1 -20   0    0.08    0.28
   1 -20   0    0.57    0.35
  -1 -20   0   -0.06    0.36
  -1 -20   0    0.13    0.30
   1 -20   0    0.88    0.41
  -1  20   0    0.19    0.39
   1  20   0   -0.08    0.36
  -1  20   0   -0.01    0.32
   1  20   0    0.35    0.38
   2 -20   0    0.18    0.28
  -2 -20   0    0.31    0.32
  -2 -20   0    0.10    0.32
   2 -20   0    0.42    0.33
  -2 -20   0    0.61    0.35
   2 -20   0    0.37    0.37
  -2  20   0    0.70    0.48
  -2  20   0    0.26    0.35
   2  20   0    0.56    0.43
  -3 -20   0   -0.30    0.26
  -3 -20   0    0.20    0.36
   3 -20   0    0.11    0.29
   3 -20   0   -0.54    0.26
   3 -20   0   -0.40    0.31
  -3 -20   0    0.02    0.32
   3  20   0   -0.22    0.34
  -3  20   0    0.41    0.44
  -3  20   0   -0.25    0.39
   3  20   0   -0.15    0.38
  -4 -20   0    0.30    0.36
   4 -20   0   -0.03    0.32
   4 -20   0    0.01    0.44
  -4 -20   0    0.88    0.39
  -4 -20   0    0.24    0.31
   4 -20   0    0.38    0.31
  -4  20   0    1.08    0.50
  -4  20   0    0.73    0.45
   4  20   0    0.85    0.40
   4  20   0    0.20    0.49
   5 -20   0    0.05    0.37
   5 -20   0    0.45    0.44
  -5 -20   0   -0.01    0.32
  -5 -20   0    0.20    0.39
  -5 -20   0   -0.08    0.37
   5  20   0   -0.04    0.37
  -5  20   0   -0.17    0.37
  -5  20   0   -0.74    0.36
   5  20   0    0.22    0.46
   0 -21   0    0.29    0.33
   0 -21   0   -0.01    0.40
   0  21   0   -0.11    0.36
   0  21   0    0.85    0.47
   1 -21   0    0.18    0.33
   1 -21   0   -0.06    0.29
   1 -21   0    0.09    0.36
  -1 -21   0    0.50    0.34
  -1 -21   0   -0.43    0.32
  -1 -21   0   -0.49    0.26
   1  21   0   -0.75    0.34
   1  21   0    0.50    0.45
  -1  21   0   -0.58    0.44
  -1  21   0    0.49    0.44
  -2 -21   0    0.36    0.34
   2 -21   0    0.73    0.43
  -2 -21   0    0.11    0.37
   2 -21   0    1.49    0.43
   2 -21   0    1.02    0.40
  -2 -21   0    1.81    0.50
  -2  21   0    0.95    0.54
  -2  21   0    0.89    0.47
   2  21   0    1.40    0.53
   3 -21   0    0.96    0.46
  -3 -21   0    0.53    0.40
  -3 -21   0    0.14    0.44
   3 -21   0    1.24    0.41
   3 -21   0    1.94    0.48
  -3 -21   0    0.64    0.42
   3  21   0    1.17    0.57
   3  21   0    1.24    0.52
  -3  21   0    1.44    0.53
  -3  21   0    1.42    0.63
   4 -21   0    0.26    0.38
   4 -21   0   -0.07    0.35
   4 -21   0    0.44    0.33
  -4  21   0   -0.17    0.37
  -4  21   0    0.63    0.46
   4  21   0    0.87    0.49
   4  21   0    1.00    0.45
   0 -22   0    4.22    0.69
   0 -22   0    3.45    0.62
   0 -22   0    3.42    0.57
   0  22   0    2.43    0.64
   0  22   0    2.23    0.67
  -1 -22   0    0.17    0.35
   1 -22   0    0.69    0.44
  -1 -22   0    0.22    0.37
   1 -22   0    0.50    0.39
  -1 -22   0    0.39    0.44
   1  22   0   -0.17    0.46
  -1  22   0   -0.16    0.49
  -1  22   0   -0.07    0.43
 -12   0   1   -0.55    0.43
 -12   0   1   -0.36    0.30
  12   0  -1    0.00    0.37
  12   0  -1    0.04    0.43
 -11   0   1    0.09    0.32
  11   0  -1    0.12    0.30
  11   0  -1    0.01    0.40
 -11   0   1   -0.02    0.24
  10   0  -1    0.00    0.30
  10   0  -1    0.19    0.32
 -10   0   1    0.16    0.22
 -10   0   1    0.07    0.30
  -9   0   1   -0.06    0.25
   9   0  -1   -0.10    0.26
   9   0  -1   -0.01    0.29
   9   0  -1    0.01    0.22
  -9   0   1    0.19    0.20
  -9   0   1    0.02    0.19
  -8   0   1   -0.13    0.16
  -8   0   1    0.14    0.24
  -8   0   1    0.21    0.17
   8   0  -1    0.06    0.23
   8   0  -1   -0.09    0.19
   8   0  -1    0.08    0.27
  -7   0   1    0.32    0.20
   7   0  -1    0.03    0.22
   7   0  -1   -0.10    0.16
  -7   0   1   -0.03    0.14
  -7   0   1   -0.20    0.17
   7   0  -1    0.02    0.19
  -7   0   1   -0.12    0.14
  -6   0   1    0.07    0.12
   6   0  -1   -0.21    0.16
  -6   0   1   -0.01    0.14
  -6   0   1   -0.11    0.14
   6   0  -1   -0.01    0.13
   6   0  -1    0.20    0.17
  -5   0   1    0.05    0.09
   5   0  -1    0.01    0.11
  -5   0   1    0.15    0.12
   5   0  -1    0.04    0.17
   5   0  -1    0.25    0.17
  -5   0   1    0.05    0.13
   4   0  -1   -0.08    0.15
  -4   0   1    0.03    0.07
   4   0  -1    0.00    0.08
  -4   0   1    0.03    0.11
   4   0  -1    0.05    0.15
  -4   0   1    0.09    0.12
  -4   0   1   -0.06    0.08
   3   0  -1    0.00    0.07
  -3   0   1   -0.01    0.09
   3   0  -1    0.05    0.13
   3   0  -1    0.03    0.11
  -3   0   1    0.10    0.09
  -3   0   1   -0.04    0.05
  -2   0   1   -0.06    0.07
  -2   0   1    0.02    0.08
   2   0  -1   -0.14    0.09
   2   0  -1   -0.08    0.08
   2   0  -1    0.02    0.06
  -2   0   1    0.05    0.04
  -1   0   1    0.00    0.03
   1   0  -1    0.01    0.04
   1   0  -1    0.02    0.04
   1   0  -1   -0.04    0.05
  -1   0   1   -0.02    0.01
   1   0  -1   -0.05    0.02
   0   0   1    0.00    0.01
   0   0  -1    0.00    0.01
   0   0  -1    0.00    0.02
   0   0  -1   -0.01    0.02
   0   0   1    0.02    0.01
   0   0  -1   -0.01    0.02
   0   0  -1    0.00    0.02
  -1   0  -1   -0.01    0.03
  -1   0  -1    0.04    0.04
  -1   0  -1   -0.06    0.04
  -1   0  -1    0.04    0.06
   1   0   1    0.03    0.06
  -1   0  -1   -0.01    0.04
   1   0   1    0.00    0.03
   1   0   1    0.00    0.04
  -2   0  -1   -0.02    0.08
  -2   0  -1    0.09    0.07
  -2   0  -1    0.11    0.06
  -2   0  -1   -0.03    0.07
   2   0   1    0.06    0.10
  -2   0  -1   -0.01    0.06
   2   0   1   -0.01    0.09
   2   0   1    0.03    0.07
  -3   0  -1    0.05    0.09
   3   0   1    0.16    0.12
   3   0   1   -0.04    0.11
  -3   0  -1   -0.17    0.07
   3   0   1   -0.14    0.08
  -3   0  -1   -0.03    0.10
  -3   0  -1    0.06    0.07
  -4   0  -1   -0.07    0.11
  -4   0  -1    0.12    0.12
   4   0   1   -0.32    0.12
  -4   0  -1   -0.12    0.08
   4   0   1    0.03    0.09
  -4   0  -1   -0.09    0.09
   4   0   1   -0.17    0.11
   5   0   1    0.19    0.16
   5   0   1    0.05    0.10
   5   0   1   -0.12    0.14
  -5   0  -1    0.05    0.13
  -5   0  -1   -0.11    0.10
  -5   0  -1   -0.15    0.09
  -5   0  -1   -0.17    0.11
  -6   0  -1    0.14    0.15
  -6   0  -1   -0.17    0.09
   6   0   1   -0.11    0.16
  -6   0  -1   -0.28    0.14
   6   0   1    0.16    0.14
  -6   0  -1    0.13    0.13
   6   0   1    0.07    0.17
   7   0   1    0.18    0.22
  -7   0  -1   -0.17    0.22
  -7   0  -1   -0.30    0.11
  -7   0  -1   -0.20    0.17
   7   0   1   -0.17    0.14
   7   0   1   -0.19    0.21
  -7   0  -1    0.20    0.16
  -8   0  -1    0.10    0.25
  -8   0  -1    0.06    0.16
   8   0   1   -0.13    0.19
   8   0   1   -0.29    0.26
   8   0   1    0.29    0.29
  -8   0  -1    0.12    0.22
  -8   0  -1   -0.01    0.16
   9   0   1    0.03    0.29
  -9   0  -1   -0.25    0.24
  -9   0  -1   -0.11    0.18
  10   0   1   -0.22    0.32
 -10   0  -1    0.01    0.22
 -10   0  -1    0.07    0.32
  10   0   1    0.08    0.31
 -11   0  -1    0.19    0.29
  11   0   1    0.22    0.37
 -11   0  -1   -0.60    0.32
 -11   0  -1    0.35    0.37
  11   0   1    0.07    0.39
 -12   0  -1   -0.63    0.42
  12   0   1   -0.17    0.42
  12  -1  -1   -0.28    0.44
 -12  -1   1   -0.14    0.44
 -12  -1   1    0.47    0.33
  12  -1  -1    0.04    0.41
  12   1  -1    0.07    0.40
 -12   1   1   -0.50    0.41
  12   1  -1    0.25    0.42
 -11  -1   1    1.00    0.44
 -11  -1   1    0.75    0.32
  11  -1  -1    1.00    0.48
  11  -1  -1    0.62    0.40
 -11   1   1    0.78    0.44
  11   1  -1    0.74    0.45
  11   1  -1    1.02    0.43
 -11   1   1    0.53    0.31
 -10  -1   1   -0.03    0.27
  10  -1  -1    0.00    0.31
 -10  -1   1    0.06    0.23
  10  -1  -1    0.04    0.32
  10   1  -1   -0.03    0.34
 -10   1   1   -0.30    0.18
  10   1  -1    0.05    0.33
 -10   1   1   -0.12    0.24
 -10   1   1    0.01    0.29
  -9  -1   1    0.42    0.23
   9  -1  -1    0.22    0.26
   9  -1  -1   -0.33    0.27
  -9  -1   1    0.66    0.23
  -9  -1   1    1.31    0.34
   9  -1  -1    0.50    0.26
   9   1  -1    0.50    0.25
   9   1  -1    0.66    0.34
  -9   1   1    0.22    0.29
  -9   1   1    0.31    0.24
   9   1  -1    0.87    0.38
  -9   1   1    0.70    0.23
   8  -1  -1   16.92    0.80
  -8  -1   1   19.30    0.76
  -8  -1   1   18.87    0.91
   8  -1  -1   17.24    0.89
  -8  -1   1   18.69    0.76
   8  -1  -1   19.29    0.95
  -8   1   1   18.27    0.93
   8   1  -1   19.25    0.86
   8   1  -1   17.71    0.92
  -8   1   1   18.06    0.73
   8   1  -1   20.54    1.01
  -8   1   1   19.01    0.80
  -7  -1   1    3.82    0.37
  -7  -1   1    3.45    0.40
   7  -1  -1    3.62    0.48
   7  -1  -1    3.54    0.45
   7  -1  -1    3.40    0.38
  -7  -1   1    3.37    0.43
  -7   1   1    4.30    0.41
   7   1  -1    3.59    0.49
  -7   1   1    3.44    0.44
   7   1  -1    4.34    0.42
   7   1  -1    3.78    0.46
  -7   1   1    3.90    0.35
  -7   1   1    3.66    0.39
  -6  -1   1   25.81    0.75
   6  -1  -1   26.09    0.90
   6  -1  -1   26.09    1.03
  -6  -1   1   26.44    0.90
  -6  -1   1   27.43    0.98
  -6  -1   1   26.23    0.85
   6  -1  -1   26.97    1.00
   6   1  -1   26.25    0.90
   6   1  -1   26.30    0.99
  -6   1   1   26.06    0.89
  -6   1   1   27.37    1.00
  -6   1   1   27.26    0.83
  -6   1   1   26.73    0.89
   6   1  -1   26.50    1.06
  -5  -1   1    0.54    0.11
  -5  -1   1    0.19    0.13
   5  -1  -1    0.53    0.19
   5  -1  -1    0.28    0.20
   5  -1  -1    0.14    0.12
  -5  -1   1    0.23    0.14
  -5  -1   1    0.36    0.13
   5   1  -1    0.65    0.22
  -5   1   1    0.31    0.10
  -5   1   1    0.49    0.15
   5   1  -1    0.30    0.19
  -5   1   1    0.45    0.17
   5   1  -1    0.44    0.14
  -4  -1   1    0.29    0.13
  -4  -1   1    0.40    0.13
   4  -1  -1    0.24    0.17
   4  -1  -1    0.39    0.12
  -4  -1   1    0.34    0.10
  -4  -1   1    0.46    0.10
   4  -1  -1    0.14    0.14
   4   1  -1    0.38    0.17
  -4   1   1    0.04    0.12
  -4   1   1    0.37    0.12
   4   1  -1    0.23    0.11
   4   1  -1   -0.05    0.17
  -4   1   1    0.33    0.09
   3  -1  -1    0.15    0.12
   3  -1  -1   -0.02    0.07
  -3  -1   1    0.17    0.10
  -3  -1   1    0.32    0.09
  -3  -1   1    0.07    0.06
  -3  -1   1    0.24    0.11
   3  -1  -1   -0.15    0.11
   3   1  -1    0.08    0.13
  -3   1   1    0.08    0.11
  -3   1   1    0.15    0.09
   3   1  -1    0.12    0.09
   3   1  -1    0.41    0.13
   2  -1  -1   34.92    0.89
   2  -1  -1   34.61    0.93
   2  -1  -1   34.89    0.84
   2  -1  -1   35.07    0.88
  -2  -1   1   34.21    0.85
  -2   1   1   33.96    0.83
  -2   1   1   34.53    0.90
   2   1  -1   34.84    0.84
   2   1  -1   34.22    0.87
   2   1  -1   34.27    0.94
   1  -1  -1  109.60    2.38
   1  -1  -1  109.32    2.32
  -1  -1   1  110.99    2.37
   1  -1  -1  111.99    2.41
   1   1  -1  110.87    2.45
   1   1  -1  110.61    2.36
  -1   1   1   99.55    2.38
   0  -1  -1   -0.01    0.02
   0  -1  -1    0.01    0.03
   0  -1   1   -0.01    0.02
   0  -1   1   -0.01    0.02
   0  -1  -1   -0.02    0.02
   0  -1  -1    0.00    0.03
   0  -1   1    0.01    0.02
   0   1  -1   -0.02    0.02
   0   1  -1   -0.02    0.03
   0   1  -1   -0.02    0.02
  -1  -1  -1   24.77    0.59
  -1  -1  -1   24.96    0.58
  -1  -1  -1   24.14    0.57
   1  -1   1   23.37    0.59
  -1  -1  -1   25.13    0.59
   1  -1   1   23.91    0.62
  -1  -1  -1   23.64    0.57
  -1  -1  -1   24.43    0.60
  -1   1  -1   25.14    0.59
  -1   1  -1   25.54    0.62
  -1   1  -1   20.53    0.58
   1   1   1   23.23    0.56
   1   1   1   23.00    0.61
  -1   1  -1   22.61    0.58
   1   1   1   24.27    0.60
   2  -1   1   15.75    0.52
  -2  -1  -1   16.08    0.47
  -2  -1  -1   16.01    0.46
   2  -1   1   16.00    0.48
  -2  -1  -1   15.68    0.49
  -2  -1  -1   15.39    0.45
   2  -1   1   17.29    0.48
  -2  -1  -1   15.82    0.39
  -2   1  -1   15.63    0.51
  -2   1  -1   15.24    0.42
   2   1   1   16.07    0.45
  -2   1  -1   15.89    0.47
   2   1   1   15.18    0.49
  -2   1  -1   16.64    0.46
   2   1   1   14.50    0.50
  -3  -1  -1    0.77    0.16
   3  -1   1    1.06    0.15
   3  -1   1    0.70    0.15
   3  -1   1    0.73    0.17
  -3  -1  -1    0.92    0.11
  -3  -1  -1    1.17    0.16
  -3  -1  -1    1.09    0.15
  -3  -1  -1    0.97    0.13
  -3   1  -1    0.87    0.12
   3   1   1    1.02    0.18
  -3   1  -1    0.68    0.16
  -3   1  -1    0.97    0.14
   3   1   1    0.88    0.18
  -3   1  -1    1.02    0.14
   3   1   1    0.64    0.12
   4  -1   1    0.96    0.21
  -4  -1  -1    1.41    0.20
   4  -1   1    1.03    0.17
  -4  -1  -1    1.01    0.14
  -4  -1  -1    1.17    0.17
  -4  -1  -1    0.99    0.19
   4  -1   1    1.24    0.21
  -4  -1  -1    0.97    0.15
  -4   1  -1    1.02    0.16
  -4   1  -1    0.92    0.20
  -4   1  -1    1.02    0.18
   4   1   1    1.20    0.18
   4   1   1    0.86    0.21
   4   1   1    1.41    0.23
  -4   1  -1    1.01    0.14
  -5  -1  -1    6.47    0.38
  -5  -1  -1    6.20    0.32
  -5  -1  -1    6.01    0.30
  -5  -1  -1    6.04    0.42
   5  -1   1    6.14    0.41
   5  -1   1    5.82    0.43
  -5  -1  -1    6.15    0.34
   5  -1   1    6.34    0.37
   5   1   1    5.99    0.44
  -5   1  -1    6.11    0.37
  -5   1  -1    6.76    0.36
   5   1   1    5.98    0.43
   5   1   1    6.06    0.35
  -5   1  -1    6.28    0.42
  -5   1  -1    5.71    0.31
  -6  -1  -1    0.90    0.17
   6  -1   1    0.61    0.24
   6  -1   1    0.62    0.26
   6  -1   1    0.98    0.21
  -6  -1  -1    0.62    0.19
  -6  -1  -1    0.64    0.18
  -6  -1  -1    0.84    0.23
  -6   1  -1    0.93    0.21
   6   1   1    1.11    0.22
   6   1   1    1.05    0.29
  -6   1  -1    0.63    0.22
  -6   1  -1    0.77    0.20
  -6   1  -1    0.64    0.16
   6   1   1    0.88    0.27
  -7  -1  -1    1.20    0.21
   7  -1   1    1.34    0.33
  -7  -1  -1    1.50    0.30
  -7  -1  -1    1.06    0.28
  -7  -1  -1    0.99    0.21
   7  -1   1    1.14    0.25
   7   1   1    1.08    0.31
   7   1   1    0.99    0.31
   7   1   1    0.92    0.22
  -7   1  -1    0.63    0.23
  -7   1  -1    1.40    0.24
  -7   1  -1    1.57    0.36
  -7   1  -1    1.01    0.23
   8  -1   1    0.40    0.28
  -8  -1  -1    0.19    0.22
   8  -1   1   -0.23    0.18
  -8  -1  -1    0.27    0.21
  -8  -1  -1    0.09    0.23
  -8  -1  -1   -0.05    0.15
   8   1   1   -0.02    0.28
   8   1   1   -0.12    0.22
  -8   1  -1   -0.05    0.17
   8   1   1   -0.10    0.16
  -8   1  -1    0.29    0.27
  -8   1  -1   -0.06    0.18
   9  -1   1    1.89    0.44
   9  -1   1    1.62    0.41
  -9  -1  -1    1.69    0.33
  -9  -1  -1    1.21    0.42
   9   1   1    1.14    0.41
   9   1   1    1.19    0.41
  -9   1  -1    1.32    0.30
  -9   1  -1    1.79    0.43
  -9   1  -1    2.04    0.32
  10  -1   1    1.37    0.46
 -10  -1  -1    0.47    0.34
  10  -1   1    1.08    0.43
 -10  -1  -1    1.10    0.33
 -10   1  -1    0.54    0.28
 -10   1  -1    0.09    0.36
  10   1   1    0.27    0.35
 -11  -1  -1   -0.41    0.28
  11  -1   1   -0.85    0.36
  11  -1   1   -0.16    0.32
 -11  -1  -1    0.34    0.33
 -11  -1  -1   -0.03    0.36
  11   1   1   -0.01    0.40
  11   1   1   -0.01    0.35
 -11   1  -1    0.56    0.43
 -11   1  -1    0.79    0.27
  12  -2  -1    2.06    0.54
 -12  -2   1    1.28    0.51
  12  -2  -1    1.63    0.59
 -12  -2   1    2.28    0.47
  12   2  -1    1.22    0.51
 -12   2   1    1.46    0.55
  12   2  -1    1.87    0.57
 -11  -2   1    1.64    0.40
 -11  -2   1    1.08    0.42
  11  -2  -1    1.56    0.52
  11  -2  -1    1.17    0.47
 -11   2   1    1.98    0.37
  11   2  -1    1.90    0.57
  11   2  -1    1.20    0.45
 -11   2   1    2.37    0.53
  10  -2  -1    0.97    0.32
 -10  -2   1    1.19    0.34
  10  -2  -1    0.79    0.37
  10  -2  -1    0.71    0.38
 -10  -2   1    0.73    0.38
  10   2  -1    0.93    0.42
 -10   2   1    0.31    0.29
 -10   2   1    0.39    0.35
 -10   2   1    1.29    0.29
  10   2  -1    0.41    0.42
  -9  -2   1    2.06    0.36
   9  -2  -1    2.22    0.48
   9  -2  -1    1.40    0.32
   9  -2  -1    2.09    0.42
  -9  -2   1    2.41    0.45
  -9   2   1    2.49    0.50
  -9   2   1    1.68    0.35
   9   2  -1    1.48    0.41
   9   2  -1    1.67    0.46
  -9   2   1    2.17    0.32
  -8  -2   1   13.44    0.61
   8  -2  -1   13.05    0.80
  -8  -2   1   13.44    0.78
   8  -2  -1   13.98    0.72
   8  -2  -1   13.26    0.77
  -8  -2   1   14.95    0.73
  -8  -2   1   14.77    0.68
  -8   2   1   12.81    0.67
   8   2  -1   12.83    0.71
  -8   2   1   13.83    0.61
  -8   2   1   13.92    0.80
   8   2  -1   14.00    0.83
   8   2  -1   13.15    0.86
  -7  -2   1   34.03    1.12
  -7  -2   1   37.05    1.21
  -7  -2   1   36.60    1.26
   7  -2  -1   36.54    1.19
   7  -2  -1   40.11    1.37
   7  -2  -1   35.83    1.26
  -7  -2   1   36.62    1.03
  -7   2   1   35.41    1.17
   7   2  -1   36.00    1.29
  -7   2   1   35.20    1.06
   7   2  -1   38.51    1.22
  -7   2   1   35.67    1.16
   7   2  -1   36.09    1.38
  -7   2   1   36.45    1.30
   6  -2  -1    2.38    0.36
  -6  -2   1    2.15    0.26
  -6  -2   1    2.00    0.22
  -6  -2   1    2.03    0.30
  -6  -2   1    2.68    0.31
   6  -2  -1    2.93    0.36
   6  -2  -1    1.94    0.27
   6   2  -1    2.63    0.40
   6   2  -1    2.21    0.34
  -6   2   1    2.30    0.28
  -6   2   1    2.62    0.25
  -6   2   1    2.11    0.32
   6   2  -1    2.53    0.29
  -6   2   1    2.10    0.29
  -5  -2   1    5.45    0.32
  -5  -2   1    5.88    0.28
  -5  -2   1    6.46    0.37
  -5  -2   1    6.00    0.38
   5  -2  -1    4.93    0.39
   5  -2  -1    5.48    0.37
   5  -2  -1    5.92    0.36
  -5   2   1    5.35    0.36
   5   2  -1    5.49    0.40
  -5   2   1    5.93    0.34
  -5   2   1    5.81    0.29
   5   2  -1    5.73    0.35
   5   2  -1    5.45    0.43
  -5   2   1    5.50    0.39
   4  -2  -1    0.09    0.10
   4  -2  -1    0.49    0.16
  -4  -2   1    0.22    0.10
  -4  -2   1    0.26    0.11
  -4  -2   1    0.28    0.13
  -4  -2   1    0.13    0.11
   4  -2  -1    0.10    0.14
   4   2  -1    0.14    0.09
   4   2  -1    0.22    0.14
  -4   2   1    0.19    0.09
   4   2  -1    0.19    0.17
  -4   2   1    0.04    0.12
  -4   2   1    0.22    0.11
   3  -2  -1    9.23    0.40
  -3  -2   1    8.58    0.35
   3  -2  -1    8.55    0.34
  -3  -2   1   10.18    0.38
   3  -2  -1    9.10    0.41
  -3  -2   1    8.91    0.31
  -3  -2   1    8.45    0.36
  -3   2   1    9.47    0.41
  -3   2   1    8.89    0.34
   3   2  -1    9.07    0.39
   3   2  -1    9.32    0.46
   3   2  -1    8.81    0.35
   2  -2  -1   17.25    0.48
   2  -2  -1   17.64    0.54
   2  -2  -1   18.39    0.42
   2  -2  -1   17.56    0.48
  -2  -2   1   17.27    0.52
   2  -2  -1   18.97    0.57
  -2  -2   1   17.46    0.51
  -2  -2   1   17.64    0.48
   2   2  -1   18.02    0.53
  -2   2   1   17.32    0.54
   2   2  -1   18.10    0.59
  -2   2   1   17.45    0.48
   2   2  -1   18.06    0.50
  -1  -2   1   72.16    1.63
  -1  -2   1   73.18    1.62
   1  -2  -1   71.69    1.58
  -1  -2   1   73.87    1.61
   1  -2  -1   72.21    1.67
   1  -2  -1   72.55    1.57
  -1  -2   1   73.42    1.62
   1  -2  -1   72.70    1.67
   1  -2  -1   73.60    1.57
  -1   2   1   73.53    1.65
   1   2  -1   73.79    1.71
   1   2  -1   71.90    1.61
   1   2  -1   73.60    1.62
   0  -2  -1   53.75    1.21
   0  -2  -1   54.36    1.22
   0  -2  -1   55.61    1.24
   0  -2  -1   53.34    1.19
   0   2  -1   53.37    1.23
   0   2  -1   54.75    1.25
   1  -2   1   88.75    2.24
   1  -2   1  101.63    2.20
   1  -2   1   96.84    2.26
  -1  -2  -1  100.88    2.21
  -1  -2  -1   99.49    2.18
  -1  -2  -1   98.26    2.16
  -1  -2  -1   98.97    2.19
  -1  -2  -1  103.87    2.17
   1   2   1  103.80    2.26
   1   2   1  101.32    2.06
  -1   2  -1  101.99    2.25
  -1   2  -1   99.61    2.18
  -1   2  -1  101.99    2.20
  -1   2  -1  100.05    2.22
   1   2   1  100.08    2.26
  -2  -2  -1   18.32    0.52
  -2  -2  -1   17.84    0.52
  -2  -2  -1   17.41    0.52
   2  -2   1   17.72    0.52
   2  -2   1   17.62    0.56
  -2  -2  -1   19.05    0.54
   2   2   1   18.03    0.58
  -2   2  -1   18.12    0.54
   2   2   1   18.05    0.51
   2   2   1   18.40    0.57
  -2   2  -1   18.55    0.53
  -2   2  -1   18.36    0.57
  -2   2  -1   18.21    0.46
  -3  -2  -1    2.80    0.22
  -3  -2  -1    2.86    0.19
   3  -2   1    2.07    0.25
   3  -2   1    3.06    0.22
  -3  -2  -1    2.95    0.20
  -3  -2  -1    3.11    0.27
   3   2   1    3.26    0.27
  -3   2  -1    2.88    0.23
   3   2   1    3.08    0.26
  -3   2  -1    3.21    0.17
   3   2   1    3.29    0.22
  -3   2  -1    3.23    0.26
  -3   2  -1    2.68    0.21
   4  -2   1    1.16    0.22
  -4  -2  -1    1.28    0.17
   4  -2   1    1.35    0.18
  -4  -2  -1    0.90    0.12
  -4  -2  -1    0.96    0.18
  -4  -2  -1    1.28    0.19
  -4  -2  -1    0.91    0.16
  -4   2  -1    0.75    0.13
  -4   2  -1    0.84    0.20
   4   2   1    1.43    0.19
   4   2   1    1.09    0.23
  -4   2  -1    0.96    0.17
  -4   2  -1    1.22    0.18
   4   2   1    1.14    0.23
   5  -2   1    1.59    0.23
  -5  -2  -1    1.45    0.22
  -5  -2  -1    1.25    0.19
  -5  -2  -1    1.25    0.23
   5  -2   1    0.72    0.21
  -5  -2  -1    1.38    0.16
  -5  -2  -1    0.87    0.19
  -5   2  -1    1.26    0.17
  -5   2  -1    1.28    0.22
  -5   2  -1    1.18    0.21
   5   2   1    1.34    0.27
   5   2   1    1.25    0.21
  -5   2  -1    1.21    0.24
   5   2   1    1.26    0.26
  -6  -2  -1    2.62    0.27
  -6  -2  -1    2.38    0.28
   6  -2   1    1.79    0.32
  -6  -2  -1    2.43    0.35
   6  -2   1    2.01    0.27
  -6  -2  -1    2.11    0.29
  -6  -2  -1    2.23    0.22
  -6   2  -1    2.81    0.31
  -6   2  -1    2.21    0.29
   6   2   1    2.33    0.28
  -6   2  -1    2.30    0.25
  -6   2  -1    2.47    0.36
   6   2   1    2.55    0.37
   6   2   1    1.84    0.33
   7  -2   1   15.21    0.78
  -7  -2  -1   14.99    0.71
  -7  -2  -1   15.32    0.56
   7  -2   1   16.27    0.73
   7  -2   1   15.11    0.83
  -7  -2  -1   14.83    0.76
  -7  -2  -1   14.12    0.65
  -7   2  -1   15.60    0.68
  -7   2  -1   14.53    0.78
   7   2   1   15.09    0.68
   7   2   1   14.97    0.81
  -7   2  -1   15.05    0.61
  -7   2  -1   16.37    0.72
   7   2   1   14.41    0.80
   8  -2   1    0.51    0.31
   8  -2   1    0.05    0.26
  -8  -2  -1   -0.08    0.21
  -8  -2  -1   -0.34    0.20
   8  -2   1   -0.15    0.19
  -8  -2  -1   -0.09    0.16
  -8   2  -1   -0.05    0.20
  -8   2  -1    0.16    0.17
   8   2   1   -0.11    0.27
   8   2   1    0.00    0.23
  -8   2  -1    0.14    0.23
   9  -2   1    0.09    0.24
   9  -2   1    0.40    0.31
   9  -2   1   -0.29    0.26
  -9  -2  -1   -0.08    0.25
  -9  -2  -1    0.03    0.20
   9   2   1    0.09    0.29
  -9   2  -1    0.25    0.20
  -9   2  -1   -0.11    0.21
   9   2   1   -0.09    0.31
  -9   2  -1   -0.08    0.26
  10  -2   1    5.66    0.74
  10  -2   1    7.11    0.77
 -10  -2  -1    6.23    0.74
 -10  -2  -1    7.07    0.65
 -10   2  -1    6.36    0.77
 -10   2  -1    7.04    0.54
  10   2   1    8.07    0.86
  10   2   1    5.29    0.72
  11  -2   1   -0.08    0.41
  11  -2   1    0.30    0.37
 -11  -2  -1    0.16    0.44
 -11  -2  -1   -0.21    0.28
 -11  -2  -1    0.11    0.35
 -11   2  -1    0.78    0.40
  11   2   1    0.27    0.36
  12  -3  -1   -0.05    0.42
  12  -3  -1   -0.32    0.45
 -12  -3   1    0.39    0.45
 -12  -3   1   -0.86    0.29
 -12   3   1   -0.14    0.40
  12   3  -1    0.71    0.51
  12   3  -1    0.69    0.49
  12   3  -1    0.29    0.45
  11  -3  -1    2.28    0.54
 -11  -3   1    1.49    0.38
 -11  -3   1    1.79    0.50
  11  -3  -1    1.51    0.51
  11   3  -1    2.02    0.53
  11   3  -1    1.38    0.48
 -11   3   1    1.18    0.48
  10  -3  -1    2.44    0.50
 -10  -3   1    1.72    0.35
  10  -3  -1    1.02    0.42
 -10  -3   1    2.05    0.43
  10  -3  -1    2.00    0.44
 -10   3   1    1.60    0.38
 -10   3   1    1.66    0.50
  10   3  -1    1.62    0.48
 -10   3   1    1.63    0.31
  10   3  -1    1.08    0.42
  -9  -3   1    0.18    0.21
  -9  -3   1   -0.14    0.24
   9  -3  -1    0.17    0.32
   9  -3  -1    0.36    0.23
   9  -3  -1   -0.16    0.26
   9   3  -1    0.02    0.32
  -9   3   1    0.19    0.28
  -9   3   1    0.14    0.24
   9   3  -1   -0.07    0.28
  -9   3   1    0.23    0.18
   8  -3  -1   17.65    0.92
  -8  -3   1   18.45    0.91
  -8  -3   1   18.16    0.78
   8  -3  -1   18.72    0.96
  -8  -3   1   19.22    0.87
  -8  -3   1   18.65    0.69
   8  -3  -1   18.66    0.84
  -8  -3   1   17.71    0.70
  -8   3   1   18.82    0.84
  -8   3   1   18.79    0.94
   8   3  -1   18.88    0.96
   8   3  -1   17.59    0.83
  -8   3   1   18.83    0.72
   8   3  -1   17.94    1.00
   7  -3  -1   10.30    0.67
   7  -3  -1   10.12    0.63
  -7  -3   1    9.74    0.61
  -7  -3   1   11.32    0.49
   7  -3  -1   12.27    0.61
  -7  -3   1   11.63    0.57
  -7  -3   1   10.93    0.60
   7   3  -1   11.01    0.59
   7   3  -1   10.88    0.65
  -7   3   1   11.20    0.48
   7   3  -1   10.42    0.70
  -7   3   1   10.90    0.66
  -7   3   1   11.12    0.61
  -6  -3   1    0.90    0.21
  -6  -3   1    1.26    0.19
   6  -3  -1    0.65    0.21
   6  -3  -1    1.11    0.21
  -6  -3   1    0.47    0.17
   6  -3  -1    0.76    0.23
  -6  -3   1    0.40    0.18
  -6   3   1    0.83    0.22
   6   3  -1    1.00    0.25
   6   3  -1    0.45    0.23
   6   3  -1    0.87    0.19
  -6   3   1    0.91    0.25
  -6   3   1    0.75    0.19
  -6   3   1    0.83    0.15
   5  -3  -1    0.23    0.18
   5  -3  -1    0.28    0.13
  -5  -3   1    0.27    0.15
  -5  -3   1    0.32    0.12
  -5  -3   1    0.25    0.12
  -5  -3   1    0.41    0.17
   5  -3  -1    0.42    0.19
   5   3  -1    0.39    0.23
   5   3  -1    0.55    0.15
   5   3  -1    0.20    0.15
  -5   3   1    0.19    0.12
  -5   3   1    0.28    0.16
  -5   3   1    0.35    0.11
  -5   3   1    0.31    0.17
   4  -3  -1    2.66    0.28
  -4  -3   1    3.36    0.22
  -4  -3   1    3.28    0.26
   4  -3  -1    2.54    0.30
   4  -3  -1    3.25    0.25
  -4  -3   1    3.13    0.24
  -4  -3   1    3.29    0.27
   4   3  -1    3.49    0.33
   4   3  -1    3.72    0.39
  -4   3   1    2.88    0.18
  -4   3   1    3.47    0.28
  -4   3   1    3.48    0.24
  -4   3   1    3.36    0.32
   4   3  -1    3.51    0.25
  -3  -3   1   30.66    0.81
  -3  -3   1   30.36    0.84
   3  -3  -1   28.69    0.89
   3  -3  -1   31.29    0.83
   3  -3  -1   31.28    0.73
  -3  -3   1   30.14    0.85
  -3  -3   1   30.93    0.84
   3   3  -1   30.35    0.88
  -3   3   1   31.19    0.89
  -3   3   1   31.64    0.92
  -3   3   1   31.69    0.81
   3   3  -1   30.72    0.83
   3   3  -1   30.76    0.96
   2  -3  -1    9.23    0.39
   2  -3  -1    8.70    0.35
   2  -3  -1    8.27    0.29
  -2  -3   1    8.67    0.30
  -2  -3   1    8.35    0.33
  -2  -3   1    8.17    0.30
   2  -3  -1    8.66    0.26
   2   3  -1    8.47    0.32
  -2   3   1    8.74    0.35
  -2   3   1    8.39    0.36
   2   3  -1    8.96    0.35
   2   3  -1    8.23    0.38
   2   3  -1    9.35    0.32
   1  -3  -1   86.97    1.92
  -1  -3   1   88.63    1.93
   1  -3  -1   88.85    2.01
  -1  -3   1   89.80    2.00
  -1  -3   1   90.69    2.00
   1  -3  -1   87.92    1.92
   1  -3  -1   86.01    2.05
  -1  -3   1   89.63    2.00
   1  -3  -1   88.50    1.95
   1   3  -1   88.75    2.09
   1   3  -1   91.00    1.97
  -1   3   1   90.75    1.99
  -1   3   1   89.03    1.99
   1   3  -1   88.52    1.97
   0  -3  -1    0.04    0.03
   0  -3  -1    0.02    0.05
   0  -3   1   -0.02    0.06
   0  -3  -1   -0.01    0.03
   0  -3  -1    0.05    0.04
   0  -3   1    0.08    0.07
   0  -3  -1    0.18    0.08
   0  -3  -1    0.03    0.06
   0   3  -1    0.06    0.05
   0   3  -1    0.03    0.09
   0   3  -1    0.07    0.06
   0   3  -1    0.09    0.04
   0   3   1    0.02    0.05
   0   3  -1    0.04    0.08
  -1  -3  -1   13.97    0.41
  -1  -3  -1   14.45    0.37
   1  -3   1   13.13    0.44
   1  -3   1   13.50    0.46
  -1  -3  -1   14.14    0.39
  -1  -3  -1   14.85    0.39
   1  -3   1   13.96    0.42
  -1  -3  -1   13.66    0.42
  -1   3  -1   14.93    0.42
  -1   3  -1   14.18    0.46
   1   3   1   14.06    0.46
   1   3   1   14.57    0.36
  -1   3  -1   13.44    0.41
   2  -3   1    2.08    0.17
  -2  -3  -1    2.31    0.17
  -2  -3  -1    1.93    0.14
  -2  -3  -1    2.22    0.19
   2  -3   1    2.19    0.21
  -2  -3  -1    1.88    0.16
  -2  -3  -1    2.05    0.17
   2  -3   1    2.23    0.23
   2   3   1    1.94    0.21
  -2   3  -1    2.18    0.17
   2   3   1    1.61    0.20
  -2   3  -1    2.00    0.20
  -2   3  -1    2.16    0.12
   2   3   1    1.93    0.15
  -2   3  -1    1.93    0.19
  -3  -3  -1    5.36    0.28
   3  -3   1    4.81    0.33
  -3  -3  -1    6.48    0.30
  -3  -3  -1    5.61    0.30
   3  -3   1    5.22    0.32
  -3  -3  -1    5.99    0.31
   3  -3   1    5.75    0.30
  -3   3  -1    5.94    0.32
   3   3   1    5.70    0.28
   3   3   1    6.03    0.36
  -3   3  -1    5.65    0.22
   3   3   1    6.34    0.36
  -3   3  -1    5.49    0.30
  -3   3  -1    5.88    0.34
   4  -3   1   13.66    0.53
  -4  -3  -1   13.70    0.53
  -4  -3  -1   14.54    0.55
   4  -3   1   12.69    0.60
  -4  -3  -1   13.34    0.49
  -4  -3  -1   13.57    0.51
   4  -3   1   13.18    0.57
   4   3   1   13.32    0.59
   4   3   1   13.93    0.61
  -4   3  -1   12.97    0.53
  -4   3  -1   13.83    0.52
  -4   3  -1   13.08    0.58
   4   3   1   13.33    0.50
  -4   3  -1   13.85    0.43
   5  -3   1    5.15    0.35
   5  -3   1    5.34    0.43
  -5  -3  -1    5.12    0.24
   5  -3   1    6.85    0.43
  -5  -3  -1    5.44    0.32
  -5  -3  -1    5.74    0.37
  -5  -3  -1    5.61    0.36
  -5  -3  -1    5.35    0.37
   5   3   1    5.36    0.35
  -5   3  -1    5.62    0.42
  -5   3  -1    5.34    0.28
  -5   3  -1    5.43    0.35
  -5   3  -1    5.95    0.37
   5   3   1    6.04    0.43
   5   3   1    5.28    0.41
  -6  -3  -1    0.10    0.14
  -6  -3  -1    0.24    0.16
  -6  -3  -1   -0.03    0.09
  -6  -3  -1   -0.01    0.14
   6  -3   1    0.19    0.23
   6  -3   1    0.16    0.15
  -6  -3  -1    0.40    0.20
   6  -3   1    0.15    0.19
  -6   3  -1   -0.02    0.11
  -6   3  -1   -0.22    0.16
   6   3   1    0.20    0.14
   6   3   1    0.10    0.19
   6   3   1   -0.07    0.20
  -6   3  -1    0.08    0.14
  -6   3  -1    0.13    0.16
  -7  -3  -1    1.87    0.28
  -7  -3  -1    2.15    0.23
  -7  -3  -1    1.79    0.32
   7  -3   1    1.50    0.36
  -7  -3  -1    2.17    0.28
   7  -3   1    2.17    0.39
  -7  -3  -1    2.65    0.39
   7  -3   1    1.80    0.30
  -7   3  -1    1.29    0.26
  -7   3  -1    2.10    0.33
  -7   3  -1    1.43    0.33
  -7   3  -1    1.71    0.24
   7   3   1    2.31    0.41
   7   3   1    1.87    0.41
   7   3   1    1.91    0.28
   8  -3   1    0.89    0.26
  -8  -3  -1    0.95    0.26
  -8  -3  -1    0.63    0.32
   8  -3   1    0.48    0.27
  -8  -3  -1    1.05    0.28
   8  -3   1    0.48    0.34
  -8   3  -1    0.61    0.22
   8   3   1    0.79    0.39
   8   3   1    0.26    0.26
  -8   3  -1    0.77    0.21
  -8   3  -1    0.73    0.34
   9  -3   1    0.22    0.29
   9  -3   1    0.16    0.24
  -9  -3  -1    0.27    0.21
  -9  -3  -1    0.13    0.27
   9  -3   1   -0.12    0.28
  -9  -3  -1   -0.47    0.23
  -9   3  -1    0.26    0.28
   9   3   1   -0.13    0.25
  -9   3  -1    0.18    0.26
   9   3   1    0.32    0.35
  -9   3  -1   -0.01    0.19
 -10  -3  -1    0.62    0.37
  10  -3   1    0.50    0.40
  10  -3   1    0.23    0.34
 -10  -3  -1    0.94    0.32
 -10  -3  -1    0.02    0.25
  10   3   1    0.60    0.38
 -10   3  -1    0.40    0.41
 -10   3  -1    0.24    0.30
  10   3   1    0.04    0.39
 -10   3  -1    0.96    0.28
 -11  -3  -1    1.09    0.49
  11  -3   1    2.14    0.60
 -11  -3  -1    1.60    0.46
  11  -3   1    2.34    0.58
 -11  -3  -1    1.44    0.41
  11   3   1    0.86    0.44
 -11   3  -1    1.35    0.46
  11   3   1    2.21    0.58
 -11  -4   1   -0.07    0.40
  11  -4  -1    1.45    0.49
  11  -4  -1    0.75    0.48
 -11  -4   1    0.97    0.37
 -11   4   1    0.91    0.45
 -11   4   1    1.40    0.40
  11   4  -1   -0.18    0.43
  11   4  -1    1.07    0.46
  10  -4  -1    0.26    0.31
 -10  -4   1    0.47    0.28
  10  -4  -1    0.04    0.35
 -10  -4   1    0.10    0.31
  10  -4  -1   -0.42    0.26
  10   4  -1   -0.10    0.37
 -10   4   1    0.02    0.28
 -10   4   1   -0.08    0.34
  10   4  -1   -0.74    0.29
   9  -4  -1    0.12    0.29
  -9  -4   1    0.08    0.21
   9  -4  -1    0.09    0.27
   9  -4  -1    0.16    0.24
  -9  -4   1    0.11    0.28
   9   4  -1   -0.03    0.37
   9   4  -1    0.29    0.33
  -9   4   1   -0.29    0.28
  -9   4   1    0.17    0.26
  -9   4   1    0.19    0.18
  -8  -4   1   11.25    0.70
  -8  -4   1    9.69    0.65
  -8  -4   1   10.86    0.54
   8  -4  -1   11.50    0.76
   8  -4  -1   10.71    0.70
  -8  -4   1   10.77    0.60
   8  -4  -1    9.99    0.63
   8   4  -1    9.63    0.79
  -8   4   1   10.37    0.66
   8   4  -1   11.23    0.75
  -8   4   1   11.62    0.77
  -8   4   1   10.80    0.50
   7  -4  -1   11.71    0.62
  -7  -4   1   11.25    0.61
   7  -4  -1   12.02    0.67
  -7  -4   1   11.87    0.63
  -7  -4   1   12.44    0.67
  -7  -4   1   12.74    0.54
   7  -4  -1   14.29    0.80
   7   4  -1   13.45    0.79
  -7   4   1   11.82    0.64
   7   4  -1   13.14    0.73
   7   4  -1   13.28    0.64
  -7   4   1   12.18    0.50
  -7   4   1   11.44    0.69
   6  -4  -1    2.28    0.36
   6  -4  -1    2.08    0.27
  -6  -4   1    2.35    0.26
  -6  -4   1    2.33    0.31
  -6  -4   1    2.46    0.33
   6  -4  -1    2.33    0.33
  -6  -4   1    1.94    0.27
   6   4  -1    2.12    0.38
  -6   4   1    2.18    0.28
   6   4  -1    2.61    0.31
   6   4  -1    2.36    0.35
  -6   4   1    1.84    0.30
  -6   4   1    2.09    0.32
  -6   4   1    2.04    0.21
   5  -4  -1    2.18    0.25
  -5  -4   1    2.49    0.23
  -5  -4   1    2.60    0.30
   5  -4  -1    2.07    0.31
  -5  -4   1    2.21    0.25
   5  -4  -1    1.95    0.28
  -5  -4   1    2.37    0.28
   5   4  -1    2.12    0.34
   5   4  -1    2.37    0.31
   5   4  -1    2.28    0.25
  -5   4   1    2.52    0.32
  -5   4   1    2.28    0.17
  -5   4   1    1.97    0.28
  -5   4   1    2.61    0.26
  -4  -4   1    4.80    0.30
  -4  -4   1    5.07    0.30
  -4  -4   1    4.86    0.33
   4  -4  -1    4.93    0.29
   4  -4  -1    4.91    0.21
   4  -4  -1    4.74    0.33
   4  -4  -1    4.46    0.36
  -4  -4   1    5.40    0.28
   4   4  -1    5.29    0.34
  -4   4   1    4.91    0.35
   4   4  -1    5.07    0.39
  -4   4   1    4.91    0.28
  -4   4   1    4.30    0.33
  -4   4   1    4.87    0.21
  -3  -4   1    7.57    0.36
   3  -4  -1    7.62    0.41
  -3  -4   1    6.87    0.31
   3  -4  -1    7.08    0.25
   3  -4  -1    7.17    0.31
  -3  -4   1    7.01    0.33
   3  -4  -1    6.95    0.37
  -3  -4   1    6.82    0.31
  -3   4   1    6.88    0.22
   3   4  -1    7.12    0.32
  -3   4   1    6.94    0.38
   3   4  -1    6.86    0.41
   3   4  -1    7.54    0.37
  -3   4   1    6.37    0.35
  -2  -4   1    0.28    0.09
   2  -4  -1    0.27    0.13
   2  -4  -1    0.20    0.08
   2  -4  -1    0.09    0.07
  -2  -4   1    0.17    0.09
   2  -4  -1    0.23    0.12
  -2  -4   1    0.18    0.07
   2   4  -1   -0.05    0.09
  -2   4   1    0.09    0.09
   2   4  -1    0.32    0.09
   2   4  -1    0.24    0.11
  -2   4   1    0.16    0.11
   2   4  -1    0.27    0.14
  -1  -4   1  495.87   10.77
  -1  -4   1  508.93   10.82
  -1  -4   1  509.88   10.69
  -1  -4   1  499.16   10.84
   1  -4  -1  506.67   10.77
   1  -4  -1  506.33   10.68
   1  -4  -1  506.00   11.04
   1  -4  -1  516.89   11.25
   1  -4  -1  510.39   10.68
   1   4  -1  509.15   10.73
   1   4  -1  506.28   11.03
  -1   4   1  514.43   10.57
   1   4  -1  505.84   10.55
  -1   4   1  516.17   10.78
   0  -4  -1   13.88    0.37
   0  -4  -1   13.51    0.36
   0  -4  -1   13.68    0.35
   0  -4  -1   12.68    0.44
   0  -4  -1   13.86    0.35
   0  -4   1   13.49    0.43
   0  -4   1   13.90    0.44
   0  -4  -1   13.72    0.42
   0  -4   1   12.80    0.42
   0   4  -1   13.46    0.46
   0   4   1   13.47    0.42
   0   4  -1   13.47    0.47
   0   4  -1   14.06    0.36
   0   4  -1   14.09    0.35
   0   4  -1   13.22    0.40
   0   4   1   13.75    0.48
  -1  -4  -1    8.11    0.29
  -1  -4  -1    7.81    0.34
   1  -4   1    8.61    0.32
  -1  -4  -1    8.95    0.30
   1  -4   1    9.03    0.36
  -1  -4  -1    8.60    0.25
   1  -4   1    8.70    0.32
   1  -4   1    8.62    0.37
  -1  -4  -1    7.91    0.32
   1   4   1    8.25    0.36
   1   4   1    8.32    0.28
  -1   4  -1    8.70    0.37
  -1   4  -1    8.48    0.31
  -1   4  -1    8.77    0.31
   2  -4   1    2.66    0.26
  -2  -4  -1    2.88    0.19
   2  -4   1    2.24    0.19
  -2  -4  -1    2.87    0.18
  -2  -4  -1    2.97    0.17
  -2  -4  -1    2.95    0.20
  -2  -4  -1    2.69    0.18
  -2  -4  -1    2.48    0.19
   2  -4   1    2.51    0.24
  -2   4  -1    2.64    0.12
   2   4   1    2.61    0.17
   2   4   1    2.80    0.27
  -2   4  -1    2.94    0.20
   2   4   1    2.75    0.26
   2   4   1    2.65    0.14
  -2   4  -1    2.85    0.21
  -2   4  -1    3.04    0.24
  -3  -4  -1    0.79    0.14
   3  -4   1    0.57    0.18
  -3  -4  -1    1.05    0.17
  -3  -4  -1    1.01    0.16
   3  -4   1    0.80    0.18
  -3  -4  -1    0.60    0.14
   3  -4   1    0.67    0.13
  -3   4  -1    0.78    0.17
   3   4   1    0.70    0.19
  -3   4  -1    0.79    0.17
  -3   4  -1    0.89    0.16
   3   4   1    1.02    0.15
   3   4   1    0.81    0.20
  -4  -4  -1    0.59    0.15
   4  -4   1    0.75    0.15
   4  -4   1    1.10    0.22
  -4  -4  -1    1.07    0.18
   4  -4   1    0.83    0.22
  -4  -4  -1    0.79    0.16
  -4  -4  -1    0.62    0.17
  -4   4  -1    0.71    0.19
   4   4   1    0.91    0.16
  -4   4  -1    1.10    0.12
   4   4   1    0.67    0.20
  -4   4  -1    0.77    0.19
   4   4   1    0.93    0.23
  -4   4  -1    0.62    0.15
   5  -4   1    0.98    0.23
  -5  -4  -1    0.97    0.21
  -5  -4  -1    0.77    0.18
  -5  -4  -1    1.05    0.18
  -5  -4  -1    0.99    0.19
   5  -4   1    1.04    0.20
   5  -4   1    0.54    0.23
   5   4   1    1.20    0.20
  -5   4  -1    1.27    0.24
   5   4   1    1.00    0.27
  -5   4  -1    1.09    0.15
  -5   4  -1    1.14    0.21
  -5   4  -1    0.71    0.21
   5   4   1    0.77    0.25
  -6  -4  -1   14.04    0.45
  -6  -4  -1   14.41    0.68
  -6  -4  -1   14.19    0.59
   6  -4   1   13.81    0.74
   6  -4   1   14.22    0.65
   6  -4   1   14.34    0.72
  -6  -4  -1   14.57    0.67
  -6  -4  -1   14.01    0.64
  -6   4  -1   13.85    0.63
   6   4   1   14.28    0.73
  -6   4  -1   14.73    0.52
   6   4   1   14.72    0.63
   6   4   1   13.80    0.74
  -6   4  -1   13.83    0.65
  -6   4  -1   13.84    0.72
  -7  -4  -1    0.25    0.22
  -7  -4  -1   -0.10    0.20
   7  -4   1   -0.16    0.18
   7  -4   1    0.15    0.18
   7  -4   1    0.37    0.26
  -7  -4  -1    0.22    0.19
  -7  -4  -1    0.19    0.18
   7   4   1    0.18    0.27
  -7   4  -1    0.24    0.24
  -7   4  -1    0.50    0.21
   7   4   1    0.22    0.24
  -7   4  -1    0.30    0.15
   8  -4   1    3.79    0.43
  -8  -4  -1    4.51    0.42
   8  -4   1    3.63    0.56
   8  -4   1    4.07    0.53
  -8  -4  -1    4.34    0.49
  -8  -4  -1    4.10    0.51
  -8  -4  -1    3.96    0.44
  -8   4  -1    3.67    0.54
   8   4   1    4.56    0.61
  -8   4  -1    4.33    0.49
   8   4   1    4.17    0.55
  -8   4  -1    3.67    0.36
  -9  -4  -1    0.12    0.20
  -9  -4  -1    0.40    0.28
   9  -4   1   -0.05    0.33
   9  -4   1   -0.02    0.25
  -9  -4  -1    0.18    0.27
   9  -4   1   -0.09    0.29
  -9   4  -1    0.24    0.29
   9   4   1   -0.23    0.29
   9   4   1   -0.31    0.30
  -9   4  -1    0.05    0.28
  -9   4  -1    0.00    0.18
 -10  -4  -1    0.10    0.29
  10  -4   1   -0.04    0.32
  10  -4   1    0.62    0.36
 -10  -4  -1   -0.05    0.35
 -10  -4  -1    0.18    0.29
 -10   4  -1   -0.24    0.30
  10   4   1    0.25    0.37
 -10   4  -1   -0.25    0.34
  10   4   1    0.19    0.35
 -11  -4  -1    0.39    0.30
 -11  -4  -1    0.70    0.34
 -11  -4  -1    0.38    0.37
  11  -4   1    0.23    0.34
  11  -4   1    0.85    0.48
  11   4   1    0.50    0.46
  11   4   1    0.39    0.46
 -11   4  -1    0.51    0.40
 -11  -5   1   -0.05    0.31
 -11  -5   1    0.52    0.34
  11  -5  -1   -0.39    0.41
  11  -5  -1    0.17    0.38
  11   5  -1   -0.17    0.38
 -11   5   1    0.63    0.39
 -11   5   1    0.06    0.36
  11   5  -1    0.04    0.39
  10  -5  -1    4.74    0.64
 -10  -5   1    4.00    0.61
 -10  -5   1    4.81    0.57
  10  -5  -1    4.77    0.60
  10  -5  -1    4.27    0.69
  10   5  -1    4.42    0.65
 -10   5   1    4.26    0.61
  10   5  -1    4.96    0.75
 -10   5   1    3.69    0.62
  -9  -5   1    2.30    0.39
   9  -5  -1    2.98    0.49
   9  -5  -1    2.53    0.54
   9  -5  -1    2.72    0.41
  -9  -5   1    3.30    0.50
   9   5  -1    1.27    0.45
   9   5  -1    1.81    0.42
  -9   5   1    2.44    0.41
  -9   5   1    3.04    0.54
  -8  -5   1    0.25    0.26
   8  -5  -1    0.51    0.30
   8  -5  -1    0.05    0.20
   8  -5  -1    0.05    0.31
  -8  -5   1    0.83    0.21
  -8  -5   1   -0.09    0.23
  -8  -5   1    0.45    0.23
   8   5  -1   -0.63    0.24
  -8   5   1    0.22    0.26
  -8   5   1    0.17    0.15
  -8   5   1    0.76    0.31
   8   5  -1    0.59    0.37
  -7  -5   1   13.18    0.67
   7  -5  -1   11.46    0.74
   7  -5  -1   13.68    0.75
  -7  -5   1   13.41    0.58
   7  -5  -1   14.17    0.67
  -7  -5   1   14.44    0.67
  -7  -5   1   12.86    0.68
   7   5  -1   11.95    0.63
  -7   5   1   13.33    0.50
   7   5  -1   12.76    0.79
   7   5  -1   12.52    0.72
  -7   5   1   12.64    0.70
  -7   5   1   12.86    0.74
  -6  -5   1    0.38    0.20
   6  -5  -1    0.43    0.23
  -6  -5   1    0.32    0.16
   6  -5  -1    0.21    0.15
   6  -5  -1    0.23    0.10
  -6  -5   1    0.18    0.14
  -6  -5   1    0.21    0.16
   6  -5  -1    0.59    0.21
   6   5  -1   -0.35    0.17
   6   5  -1    0.26    0.21
  -6   5   1    0.00    0.17
  -6   5   1    0.07    0.10
  -6   5   1    0.28    0.18
   6   5  -1    0.19    0.15
  -5  -5   1    3.96    0.31
  -5  -5   1    3.75    0.34
   5  -5  -1    4.04    0.21
  -5  -5   1    3.44    0.34
  -5  -5   1    3.96    0.28
   5  -5  -1    4.11    0.32
   5  -5  -1    3.87    0.42
   5  -5  -1    4.00    0.41
   5   5  -1    4.03    0.39
   5   5  -1    4.49    0.47
  -5   5   1    3.80    0.40
  -5   5   1    4.75    0.37
  -5   5   1    3.96    0.21
  -5   5   1    4.11    0.30
   5   5  -1    4.33    0.32
   4  -5  -1    9.58    0.42
  -4  -5   1    9.53    0.41
  -4  -5   1    9.25    0.43
   4  -5  -1    9.17    0.32
   4  -5  -1    8.53    0.47
  -4  -5   1    9.56    0.40
  -4  -5   1    8.71    0.44
   4  -5  -1    9.13    0.51
   4   5  -1    8.99    0.52
  -4   5   1    9.11    0.48
  -4   5   1    9.23    0.29
   4   5  -1    9.47    0.41
  -4   5   1    9.36    0.48
   4   5  -1    9.08    0.47
  -3  -5   1   55.42    1.43
   3  -5  -1   52.93    1.36
   3  -5  -1   54.17    1.30
   3  -5  -1   55.41    1.52
   3  -5  -1   54.85    1.36
  -3  -5   1   55.15    1.39
  -3  -5   1   55.18    1.34
   3  -5  -1   56.83    1.51
  -3  -5   1   57.88    1.40
   3   5  -1   56.80    1.47
   3   5  -1   54.07    1.37
  -3   5   1   55.50    1.45
   3   5  -1   54.15    1.34
   3   5  -1   53.97    1.55
  -3   5   1   55.72    1.21
  -3   5   1   57.14    1.48
  -2  -5   1   11.17    0.41
  -2  -5   1   11.21    0.33
  -2  -5   1   10.13    0.43
   2  -5  -1   10.70    0.37
   2  -5  -1   10.72    0.46
  -2  -5   1   10.30    0.42
  -2  -5   1   11.39    0.40
   2  -5  -1   10.63    0.36
  -2   5   1   10.79    0.42
  -2   5   1   11.47    0.47
   2   5  -1   11.58    0.52
   2   5  -1   11.74    0.43
   2   5  -1   11.15    0.39
   1  -5  -1   93.50    2.10
  -1  -5   1   91.31    2.06
  -1  -5   1   92.38    2.14
   1  -5  -1   91.44    2.03
  -1  -5   1   89.78    2.11
  -1  -5   1   92.30    2.12
   1  -5  -1   90.92    2.08
   1  -5  -1   92.16    2.03
   1   5  -1   89.26    2.10
  -1   5   1   93.38    2.08
   1   5  -1   94.42    2.25
  -1   5   1   90.76    2.12
   1   5  -1   92.30    2.07
   0  -5  -1  161.06    3.41
   0  -5  -1  159.40    3.51
   0  -5   1  162.22    3.56
   0  -5   1  156.34    3.50
   0  -5  -1  159.00    3.43
   0  -5  -1  157.88    3.41
   0  -5   1  156.26    3.52
   0  -5  -1  156.98    3.57
   0   5  -1  159.19    3.39
   0   5   1  151.08    3.64
   0   5  -1  162.59    3.50
   0   5   1  162.71    3.42
   0   5  -1  155.38    3.64
   0   5  -1  163.97    3.42
   0   5  -1  158.34    3.46
   0   5   1  160.31    3.44
  -1  -5  -1   -0.01    0.06
  -1  -5  -1    0.00    0.07
  -1  -5  -1    0.07    0.05
   1  -5   1   -0.03    0.08
  -1  -5  -1    0.01    0.08
  -1  -5  -1    0.09    0.10
   1  -5   1   -0.12    0.08
   1  -5   1   -0.10    0.09
   1   5   1   -0.03    0.06
  -1   5  -1    0.05    0.12
  -1   5  -1   -0.02    0.07
   1   5   1    0.12    0.12
  -1   5  -1    0.11    0.08
  -2  -5  -1    0.91    0.12
  -2  -5  -1    1.28    0.20
  -2  -5  -1    1.00    0.11
   2  -5   1    0.90    0.17
  -2  -5  -1    1.23    0.17
  -2  -5  -1    0.94    0.13
   2  -5   1    0.91    0.14
   2  -5   1    0.85    0.19
  -2  -5  -1    0.90    0.15
   2  -5   1    0.98    0.15
  -2   5  -1    1.03    0.20
   2   5   1    0.88    0.19
  -2   5  -1    0.93    0.14
  -2   5  -1    0.82    0.15
   2   5   1    1.51    0.23
   2   5   1    1.09    0.12
  -3  -5  -1    1.42    0.15
  -3  -5  -1    1.22    0.18
  -3  -5  -1    1.08    0.17
   3  -5   1    0.62    0.18
  -3  -5  -1    1.37    0.17
   3  -5   1    0.76    0.21
   3  -5   1    1.40    0.20
  -3  -5  -1    1.20    0.17
  -3   5  -1    1.33    0.22
   3   5   1    1.20    0.23
  -3   5  -1    1.37    0.19
   3   5   1    1.58    0.25
  -3   5  -1    1.33    0.21
   3   5   1    1.45    0.16
  -3   5  -1    1.38    0.11
  -4  -5  -1    1.72    0.22
  -4  -5  -1    1.55    0.21
  -4  -5  -1    1.64    0.24
   4  -5   1    1.99    0.30
   4  -5   1    1.48    0.21
  -4  -5  -1    1.32    0.20
   4  -5   1    1.25    0.23
  -4   5  -1    1.61    0.25
  -4   5  -1    1.58    0.25
   4   5   1    1.98    0.29
  -4   5  -1    1.78    0.22
   4   5   1    1.58    0.28
   4   5   1    1.50    0.19
   5  -5   1    0.45    0.21
   5  -5   1    0.70    0.23
  -5  -5  -1    0.29    0.16
  -5  -5  -1    0.15    0.14
  -5  -5  -1    0.25    0.15
   5  -5   1    0.74    0.18
  -5  -5  -1    0.45    0.15
   5   5   1    0.57    0.16
  -5   5  -1    0.64    0.21
  -5   5  -1    0.57    0.11
  -5   5  -1    0.36    0.16
   5   5   1    0.51    0.21
   5   5   1    0.49    0.21
  -5   5  -1    0.66    0.22
  -6  -5  -1   30.49    1.06
  -6  -5  -1   30.94    0.77
  -6  -5  -1   28.99    1.02
  -6  -5  -1   29.96    1.07
   6  -5   1   29.78    1.13
   6  -5   1   27.81    1.19
  -6  -5  -1   30.73    1.00
   6  -5   1   32.66    1.07
  -6   5  -1   31.67    0.87
  -6   5  -1   32.73    1.04
   6   5   1   33.09    1.18
  -6   5  -1   30.90    1.15
   6   5   1   34.02    1.23
  -6   5  -1   31.37    1.10
   6   5   1   31.31    1.01
  -7  -5  -1    7.34    0.53
  -7  -5  -1    7.98    0.54
   7  -5   1    7.80    0.63
  -7  -5  -1    8.15    0.53
   7  -5   1    7.42    0.52
  -7  -5  -1    7.56    0.47
   7  -5   1    7.44    0.59
   7   5   1    6.03    0.62
   7   5   1    7.81    0.60
  -7   5  -1    8.42    0.60
  -7   5  -1    8.02    0.53
  -7   5  -1    7.12    0.38
   8  -5   1    3.71    0.52
  -8  -5  -1    2.29    0.39
  -8  -5  -1    2.62    0.41
  -8  -5  -1    3.34    0.39
   8  -5   1    3.72    0.56
   8  -5   1    2.12    0.36
  -8  -5  -1    2.34    0.36
  -8   5  -1    2.50    0.43
  -8   5  -1    2.47    0.43
  -8   5  -1    2.96    0.31
   8   5   1    2.68    0.49
   8   5   1    2.11    0.45
  -9  -5  -1    0.18    0.22
   9  -5   1   -0.23    0.23
  -9  -5  -1    0.09    0.24
   9  -5   1   -0.20    0.32
   9  -5   1   -0.23    0.23
  -9  -5  -1   -0.36    0.27
  -9  -5  -1   -0.17    0.26
  -9  -5  -1   -0.36    0.15
   9   5   1    0.32    0.31
   9   5   1    0.52    0.39
  -9   5  -1    0.23    0.29
  -9   5  -1   -0.22    0.26
 -10  -5  -1   -0.23    0.32
  10  -5   1   -0.07    0.33
 -10  -5  -1   -0.09    0.25
 -10  -5  -1    0.44    0.30
  10  -5   1   -0.62    0.31
 -10   5  -1   -0.12    0.31
  10   5   1    0.37    0.40
 -10   5  -1   -0.38    0.30
  10   5   1   -0.31    0.31
  11  -5   1   -0.07    0.38
 -11  -5  -1   -0.21    0.32
  11  -5   1    0.61    0.45
 -11  -5  -1    0.06    0.29
 -11  -5  -1   -0.06    0.36
  11   5   1    0.20    0.44
  11   5   1   -0.36    0.41
 -11   5  -1    0.26    0.41
 -11  -6   1    0.10    0.38
  11  -6  -1   -0.10    0.41
 -11  -6   1   -0.19    0.27
  11  -6  -1    1.07    0.45
  11   6  -1   -0.01    0.44
  11   6  -1    0.00    0.40
 -11   6   1    0.69    0.46
 -11   6   1   -0.31    0.36
 -10  -6   1    5.07    0.59
  10  -6  -1    4.18    0.69
  10  -6  -1    4.39    0.57
 -10  -6   1    4.25    0.62
  10  -6  -1    4.54    0.71
  10   6  -1    3.72    0.65
 -10   6   1    4.05    0.65
  10   6  -1    4.99    0.77
 -10   6   1    4.90    0.64
  -9  -6   1    2.26    0.42
   9  -6  -1    1.83    0.40
  -9  -6   1    2.78    0.43
   9  -6  -1    1.91    0.50
  -9  -6   1    1.76    0.33
   9  -6  -1    1.72    0.43
   9   6  -1    1.18    0.46
  -9   6   1    2.17    0.48
  -9   6   1    1.98    0.43
   9   6  -1    2.37    0.49
   8  -6  -1    1.88    0.35
  -8  -6   1    1.31    0.33
   8  -6  -1    0.79    0.34
  -8  -6   1    1.58    0.29
  -8  -6   1    1.18    0.29
   8  -6  -1    1.33    0.38
  -8  -6   1    1.29    0.32
   8   6  -1    0.82    0.38
   8   6  -1    1.04    0.33
  -8   6   1    1.04    0.34
  -8   6   1    1.52    0.36
   7  -6  -1    2.47    0.43
   7  -6  -1    2.21    0.34
  -7  -6   1    2.04    0.34
  -7  -6   1    2.50    0.31
  -7  -6   1    3.01    0.39
  -7  -6   1    2.40    0.35
   7  -6  -1    1.96    0.38
   7   6  -1    2.39    0.45
   7   6  -1    2.27    0.41
  -7   6   1    1.53    0.37
  -7   6   1    1.72    0.35
  -7   6   1    2.59    0.24
   6  -6  -1    1.38    0.15
   6  -6  -1    1.02    0.28
   6  -6  -1    0.77    0.20
  -6  -6   1    1.55    0.26
  -6  -6   1    1.24    0.22
  -6  -6   1    1.46    0.26
   6  -6  -1    1.09    0.29
  -6  -6   1    1.01    0.25
   6   6  -1    1.46    0.25
  -6   6   1    0.98    0.28
   6   6  -1    0.97    0.34
  -6   6   1    1.16    0.15
  -6   6   1    1.20    0.27
   6   6  -1    1.77    0.34
  -5  -6   1    1.48    0.22
   5  -6  -1    0.74    0.23
  -5  -6   1    1.03    0.20
  -5  -6   1    0.72    0.19
  -5  -6   1    1.06    0.23
   5  -6  -1    1.10    0.20
   5  -6  -1    0.91    0.14
   5  -6  -1    1.43    0.28
  -5   6   1    0.99    0.26
  -5   6   1    0.95    0.24
   5   6  -1    1.33    0.29
   5   6  -1    1.04    0.19
  -5   6   1    0.96    0.12
   5   6  -1    0.83    0.22
  -4  -6   1    2.47    0.23
   4  -6  -1    2.91    0.34
   4  -6  -1    2.65    0.18
  -4  -6   1    2.13    0.27
  -4  -6   1    2.57    0.26
   4  -6  -1    2.47    0.33
  -4  -6   1    2.82    0.28
   4  -6  -1    2.66    0.26
   4   6  -1    2.59    0.31
   4   6  -1    2.98    0.37
  -4   6   1    2.63    0.12
  -4   6   1    2.54    0.31
  -4   6   1    2.72    0.30
   4   6  -1    2.46    0.25
  -3  -6   1    0.48    0.13
   3  -6  -1    0.19    0.11
   3  -6  -1    0.23    0.09
  -3  -6   1    0.21    0.09
  -3  -6   1    0.31    0.12
   3  -6  -1    0.15    0.15
  -3  -6   1    0.18    0.12
   3  -6  -1    0.08    0.10
   3  -6  -1    0.25    0.17
  -3   6   1    0.26    0.15
  -3   6   1    0.25    0.03
  -3   6   1    0.11    0.11
   3   6  -1    0.37    0.13
   3   6  -1    0.25    0.17
   3   6  -1    0.31    0.11
   3   6  -1    0.15    0.14
  -2  -6   1    9.70    0.42
   2  -6  -1   10.13    0.37
  -2  -6   1   10.00    0.29
  -2  -6   1    9.78    0.42
   2  -6  -1    9.58    0.46
  -2  -6   1   10.46    0.42
   2  -6  -1   10.01    0.36
  -2  -6   1   10.11    0.39
   2   6  -1    9.65    0.37
  -2   6   1    9.71    0.40
   2   6  -1    9.74    0.42
  -2   6   1   10.16    0.47
   2   6  -1    9.35    0.49
  -1  -6   1   11.34    0.44
   1  -6  -1   11.13    0.47
   1  -6  -1   11.41    0.34
  -1  -6   1   11.09    0.44
   1  -6  -1   11.54    0.37
   1  -6  -1   11.60    0.37
  -1  -6   1   11.71    0.45
   1  -6  -1   12.08    0.42
  -1  -6   1   11.63    0.39
   1   6  -1   11.84    0.39
   1   6  -1   10.68    0.45
  -1   6   1   12.11    0.39
  -1   6   1   11.74    0.47
   1   6  -1   11.31    0.52
   0  -6  -1   92.61    2.18
   0  -6   1   90.65    2.13
   0  -6   1   89.65    2.10
   0  -6   1   90.69    2.16
   0  -6  -1   90.11    2.01
   0  -6  -1   91.02    2.11
   0  -6   1   95.05    2.00
   0  -6  -1   89.96    2.03
   0  -6  -1   88.06    2.01
   0   6   1   86.72    2.08
   0   6   1   91.69    1.98
   0   6  -1   90.54    2.23
   0   6  -1   91.88    2.05
   0   6  -1   92.18    1.97
   0   6  -1   88.89    2.13
   0   6  -1   91.78    1.99
   0   6   1   87.07    2.23
  -1  -6  -1    1.94    0.18
  -1  -6  -1    1.61    0.21
  -1  -6  -1    1.76    0.09
  -1  -6  -1    1.64    0.16
   1  -6   1    1.59    0.09
   1  -6   1    1.63    0.18
   1  -6   1    2.04    0.24
  -1  -6  -1    1.69    0.19
   1  -6   1    1.84    0.19
   1   6   1    1.97    0.24
  -1   6  -1    1.81    0.17
  -1   6  -1    1.83    0.17
   1   6   1    1.98    0.19
  -1   6  -1    1.47    0.22
  -2  -6  -1    0.00    0.07
  -2  -6  -1    0.10    0.08
   2  -6   1    0.02    0.12
  -2  -6  -1    0.17    0.10
   2  -6   1   -0.20    0.08
   2  -6   1    0.11    0.10
   2  -6   1   -0.08    0.12
  -2  -6  -1    0.10    0.06
  -2  -6  -1    0.26    0.11
  -2  -6  -1    0.26    0.12
  -2  -6  -1    0.09    0.13
  -2   6  -1    0.18    0.10
   2   6   1    0.15    0.14
  -2   6  -1    0.12    0.15
   2   6   1    0.08    0.08
  -2   6  -1    0.08    0.10
   2   6   1    0.00    0.13
   3  -6   1    0.07    0.10
  -3  -6  -1    0.08    0.10
   3  -6   1    0.29    0.13
  -3  -6  -1    0.51    0.14
   3  -6   1    0.07    0.15
  -3  -6  -1    0.23    0.12
  -3  -6  -1    0.19    0.12
  -3  -6  -1    0.28    0.09
   3  -6   1    0.14    0.14
  -3   6  -1    0.25    0.12
   3   6   1   -0.04    0.16
  -3   6  -1    0.09    0.14
   3   6   1    0.25    0.09
  -3   6  -1    0.40    0.15
   3   6   1    0.58    0.18
  -4  -6  -1    6.01    0.36
   4  -6   1    6.04    0.43
   4  -6   1    6.30    0.42
  -4  -6  -1    6.55    0.38
  -4  -6  -1    6.01    0.34
  -4  -6  -1    6.19    0.35
  -4  -6  -1    5.54    0.30
   4  -6   1    5.85    0.36
   4   6   1    6.74    0.46
  -4   6  -1    5.57    0.39
   4   6   1    6.47    0.34
  -4   6  -1    6.28    0.42
   4   6   1    6.81    0.44
  -4   6  -1    6.92    0.37
  -4   6  -1    5.81    0.23
   5  -6   1   11.42    0.66
   5  -6   1   11.11    0.63
   5  -6   1   12.32    0.57
  -5  -6  -1   11.93    0.50
  -5  -6  -1   11.64    0.54
  -5  -6  -1   12.32    0.58
  -5  -6  -1   11.56    0.55
  -5  -6  -1   12.39    0.54
  -5   6  -1   10.85    0.40
  -5   6  -1   11.73    0.61
   5   6   1   10.30    0.64
  -5   6  -1   13.10    0.63
  -5   6  -1   12.69    0.55
   5   6   1   13.27    0.67
   5   6   1   12.54    0.53
  -6  -6  -1    9.69    0.49
   6  -6   1    9.54    0.55
   6  -6   1   10.12    0.69
  -6  -6  -1   10.30    0.55
   6  -6   1    8.76    0.58
  -6  -6  -1   10.23    0.57
  -6  -6  -1   10.01    0.53
  -6  -6  -1    9.49    0.54
  -6   6  -1    8.86    0.57
  -6   6  -1   10.07    0.62
   6   6   1   10.00    0.65
   6   6   1   10.65    0.70
   7  -6   1   11.00    0.64
  -7  -6  -1   10.63    0.64
  -7  -6  -1    9.54    0.58
   7  -6   1   11.94    0.72
   7  -6   1   11.05    0.75
  -7  -6  -1   10.31    0.57
  -7  -6  -1   10.60    0.57
  -7  -6  -1   11.64    0.67
   7   6   1   10.23    0.70
  -7   6  -1   10.80    0.45
  -7   6  -1   11.26    0.72
  -7   6  -1   11.18    0.66
   7   6   1   10.86    0.75
   8  -6   1    0.97    0.37
   8  -6   1    0.66    0.27
   8  -6   1    0.57    0.32
  -8  -6  -1    1.40    0.30
  -8  -6  -1    0.84    0.33
  -8  -6  -1    0.82    0.30
  -8  -6  -1    1.30    0.30
  -8  -6  -1    1.27    0.31
  -8   6  -1    1.18    0.35
   8   6   1    1.59    0.43
   8   6   1    0.95    0.41
  -8   6  -1    1.06    0.32
  -9  -6  -1    1.56    0.34
   9  -6   1    1.59    0.46
   9  -6   1    1.17    0.37
  -9  -6  -1    1.85    0.36
  -9  -6  -1    1.83    0.43
  -9  -6  -1    1.52    0.34
  -9  -6  -1    1.21    0.38
   9  -6   1    1.84    0.40
   9   6   1    1.43    0.49
  -9   6  -1    2.22    0.48
   9   6   1    1.06    0.45
  -9   6  -1    1.47    0.40
 -10  -6  -1    3.33    0.55
 -10  -6  -1    3.23    0.50
  10  -6   1    3.06    0.55
  10  -6   1    3.20    0.61
 -10  -6  -1    3.24    0.49
  10   6   1    3.04    0.67
 -10   6  -1    2.57    0.55
  10   6   1    2.17    0.54
 -10   6  -1    1.16    0.48
 -11  -6  -1    1.28    0.41
 -11  -6  -1    1.09    0.46
 -11  -6  -1    1.88    0.46
  11  -6   1    0.99    0.48
  11  -6   1    2.37    0.62
 -11   6  -1    1.49    0.51
  11   6   1    1.16    0.52
  11   6   1    2.39    0.58
 -11  -7   1   -1.00    0.32
  11  -7  -1   -0.35    0.42
  11  -7  -1    0.15    0.41
 -11  -7   1    0.00    0.33
  11  -7  -1   -0.02    0.37
 -11  -7   1    0.19    0.34
 -11   7   1   -0.37    0.39
  11   7  -1    0.47    0.50
 -11   7   1    0.17    0.41
  11   7  -1    0.20    0.44
  10  -7  -1    0.17    0.33
  10  -7  -1    0.75    0.40
 -10  -7   1    0.58    0.33
  10  -7  -1   -0.77    0.29
 -10  -7   1    0.88    0.37
 -10   7   1    0.60    0.31
 -10   7   1    0.56    0.38
  10   7  -1   -0.43    0.41
  10   7  -1    0.52    0.40
   9  -7  -1    0.28    0.31
   9  -7  -1    0.01    0.24
   9  -7  -1    0.05    0.29
  -9  -7   1    0.10    0.22
  -9  -7   1    0.23    0.21
  -9  -7   1   -0.18    0.29
  -9  -7   1   -0.57    0.25
   9   7  -1    0.24    0.32
  -9   7   1   -0.13    0.30
   9   7  -1    0.06    0.35
  -9   7   1   -0.25    0.25
  -8  -7   1    2.40    0.34
   8  -7  -1    2.67    0.45
  -8  -7   1    1.43    0.36
   8  -7  -1    1.44    0.32
   8  -7  -1    1.64    0.41
  -8  -7   1    2.11    0.37
  -8  -7   1    1.60    0.34
  -8   7   1    1.76    0.38
   8   7  -1    1.35    0.37
   8   7  -1    3.07    0.56
  -8   7   1    1.57    0.40
   7  -7  -1    2.32    0.36
  -7  -7   1    1.35    0.29
  -7  -7   1    2.02    0.30
  -7  -7   1    2.04    0.33
   7  -7  -1    2.36    0.43
  -7  -7   1    2.40    0.37
   7  -7  -1    1.92    0.40
  -7   7   1    2.41    0.38
  -7   7   1    1.71    0.36
   7   7  -1    1.39    0.34
   7   7  -1    1.92    0.42
   6  -7  -1    0.84    0.27
   6  -7  -1    0.55    0.27
  -6  -7   1    0.94    0.24
  -6  -7   1    0.84    0.22
  -6  -7   1    1.38    0.25
   6  -7  -1    0.81    0.14
  -6  -7   1    0.85    0.21
   6  -7  -1    1.11    0.25
  -6   7   1    0.37    0.24
   6   7  -1    0.81    0.21
   6   7  -1    0.89    0.26
  -6   7   1    1.27    0.29
  -6   7   1    0.85    0.12
   6   7  -1    0.18    0.23
  -5  -7   1    4.16    0.31
   5  -7  -1    4.37    0.45
  -5  -7   1    3.49    0.36
   5  -7  -1    4.53    0.35
   5  -7  -1    4.12    0.24
  -5  -7   1    4.20    0.34
  -5  -7   1    3.94    0.33
   5  -7  -1    4.58    0.48
   5   7  -1    3.30    0.31
  -5   7   1    3.90    0.43
   5   7  -1    4.09    0.48
   5   7  -1    4.03    0.43
  -5   7   1    4.06    0.18
  -5   7   1    3.85    0.40
  -4  -7   1    1.60    0.25
   4  -7  -1    1.75    0.18
   4  -7  -1    2.03    0.24
  -4  -7   1    1.57    0.22
  -4  -7   1    1.84    0.24
   4  -7  -1    1.94    0.32
  -4  -7   1    1.64    0.20
   4  -7  -1    1.82    0.28
   4   7  -1    1.56    0.20
   4   7  -1    1.29    0.28
   4   7  -1    1.70    0.27
   4   7  -1    1.68    0.21
  -4   7   1    1.76    0.26
  -4   7   1    1.69    0.28
   3  -7  -1    4.41    0.34
  -3  -7   1    4.48    0.32
   3  -7  -1    5.36    0.29
  -3  -7   1    4.24    0.29
  -3  -7   1    4.44    0.22
   3  -7  -1    4.91    0.26
  -3  -7   1    4.55    0.30
   3  -7  -1    4.55    0.29
   3   7  -1    3.85    0.26
   3   7  -1    4.51    0.35
   3   7  -1    4.97    0.46
  -3   7   1    3.67    0.37
  -3   7   1    4.19    0.29
   3   7  -1    4.36    0.29
   2  -7  -1    0.83    0.14
  -2  -7   1    0.64    0.15
  -2  -7   1    1.01    0.08
  -2  -7   1    1.15    0.18
   2  -7  -1    0.88    0.14
  -2  -7   1    0.90    0.15
  -2  -7   1    0.79    0.17
   2  -7  -1    0.80    0.21
  -2   7   1    0.79    0.19
   2   7  -1    0.64    0.17
   2   7  -1    0.83    0.22
   2   7  -1    1.15    0.15
  -2   7   1    1.21    0.17
   1  -7  -1   18.86    0.56
   1  -7  -1   18.48    0.68
   1  -7  -1   19.06    0.61
  -1  -7   1   20.09    0.57
  -1  -7   1   19.23    0.65
  -1  -7   1   18.78    0.63
   1  -7  -1   18.87    0.56
   1  -7  -1   18.83    0.52
  -1  -7   1   20.10    0.66
  -1   7   1   19.33    0.56
   1   7  -1   18.76    0.56
  -1   7   1   18.62    0.67
   1   7  -1   19.13    0.74
   1   7  -1   18.99    0.66
   0  -7   1    3.66    0.25
   0  -7  -1    3.48    0.19
   0  -7   1    3.74    0.26
   0  -7  -1    3.20    0.21
   0  -7  -1    4.14    0.26
   0  -7  -1    3.19    0.27
   0  -7   1    3.52    0.18
   0  -7   1    4.15    0.30
   0  -7  -1    3.67    0.20
   0   7  -1    4.17    0.31
   0   7   1    3.71    0.16
   0   7  -1    3.68    0.16
   0   7  -1    3.57    0.15
   0   7  -1    4.14    0.22
   0   7   1    3.88    0.36
   0   7  -1    3.37    0.33
   0   7   1    3.49    0.27
   1  -7   1    4.71    0.31
  -1  -7  -1    4.19    0.30
  -1  -7  -1    4.09    0.24
   1  -7   1    4.42    0.16
  -1  -7  -1    4.35    0.25
   1  -7   1    4.36    0.28
  -1  -7  -1    4.04    0.27
   1  -7   1    4.25    0.27
   1   7   1    3.89    0.33
  -1   7  -1    4.73    0.33
  -1   7  -1    4.25    0.24
  -1   7  -1    4.08    0.23
   1   7   1    4.07    0.26
   2  -7   1   -0.05    0.08
   2  -7   1   -0.12    0.11
  -2  -7  -1    0.01    0.05
  -2  -7  -1    0.11    0.10
  -2  -7  -1   -0.09    0.10
  -2  -7  -1   -0.02    0.10
  -2  -7  -1   -0.16    0.10
  -2  -7  -1    0.00    0.07
   2  -7   1    0.02    0.10
  -2   7  -1   -0.04    0.09
  -2   7  -1    0.03    0.09
   2   7   1    0.05    0.15
   2   7   1    0.07    0.10
  -2   7  -1    0.04    0.14
  -3  -7  -1    7.39    0.29
   3  -7   1    7.93    0.37
  -3  -7  -1    7.08    0.31
   3  -7   1    7.04    0.45
  -3  -7  -1    7.43    0.39
   3  -7   1    6.37    0.37
  -3  -7  -1    7.51    0.39
  -3  -7  -1    7.32    0.39
   3  -7   1    7.92    0.48
  -3   7  -1    7.79    0.46
   3   7   1    7.45    0.49
   3   7   1    7.12    0.31
   3   7   1    7.51    0.46
  -3   7  -1    7.26    0.36
  -3   7  -1    7.01    0.39
   4  -7   1    2.30    0.24
  -4  -7  -1    2.11    0.26
  -4  -7  -1    2.65    0.29
  -4  -7  -1    2.21    0.21
  -4  -7  -1    2.30    0.24
  -4  -7  -1    1.81    0.25
   4  -7   1    1.99    0.33
   4  -7   1    1.94    0.30
   4  -7   1    1.78    0.24
   4   7   1    2.08    0.22
   4   7   1    2.63    0.35
  -4   7  -1    1.79    0.29
   4   7   1    2.50    0.36
  -4   7  -1    2.17    0.29
  -4   7  -1    2.42    0.27
  -5  -7  -1    0.39    0.14
  -5  -7  -1    0.14    0.16
   5  -7   1    0.04    0.11
  -5  -7  -1    0.67    0.18
   5  -7   1    0.20    0.21
  -5  -7  -1    0.34    0.17
  -5  -7  -1    0.32    0.19
   5  -7   1    0.25    0.16
   5  -7   1    0.24    0.19
  -5   7  -1    0.13    0.18
   5   7   1    0.18    0.23
  -5   7  -1    0.45    0.15
   5   7   1    0.43    0.16
  -5   7  -1    0.02    0.16
   5   7   1    0.14    0.22
  -5   7  -1    0.29    0.09
  -6  -7  -1    0.21    0.17
   6  -7   1   -0.04    0.20
   6  -7   1    0.08    0.16
  -6  -7  -1    0.21    0.18
  -6  -7  -1   -0.10    0.16
  -6  -7  -1   -0.01    0.16
  -6  -7  -1    0.41    0.15
   6  -7   1    0.16    0.21
  -6   7  -1    0.01    0.18
   6   7   1   -0.21    0.24
   6   7   1    0.04    0.18
  -6   7  -1    0.11    0.12
  -6   7  -1   -0.05    0.19
   7  -7   1    7.13    0.61
  -7  -7  -1    6.08    0.56
   7  -7   1    6.13    0.65
  -7  -7  -1    5.71    0.53
   7  -7   1    6.26    0.67
  -7  -7  -1    6.60    0.45
  -7  -7  -1    7.17    0.53
  -7  -7  -1    6.40    0.47
  -7   7  -1    6.16    0.62
   7   7   1    5.98    0.65
  -7   7  -1    6.62    0.66
   7   7   1    6.17    0.66
  -8  -7  -1    0.30    0.25
   8  -7   1    0.03    0.25
  -8  -7  -1    0.22    0.25
   8  -7   1    0.11    0.29
  -8  -7  -1    0.07    0.18
  -8  -7  -1   -0.14    0.21
  -8  -7  -1    0.19    0.20
   8  -7   1    0.31    0.25
  -8   7  -1    0.27    0.30
   8   7   1    0.60    0.38
   8   7   1    0.06    0.28
  -8   7  -1    0.30    0.28
  -9  -7  -1    0.57    0.35
  -9  -7  -1    0.39    0.27
   9  -7   1    0.58    0.32
  -9  -7  -1    0.95    0.30
   9  -7   1    0.76    0.38
  -9  -7  -1    0.39    0.26
  -9  -7  -1    0.05    0.27
   9  -7   1    0.22    0.39
  -9   7  -1    0.65    0.37
   9   7   1    0.51    0.38
   9   7   1    0.02    0.40
  -9   7  -1   -0.22    0.29
 -10  -7  -1    0.44    0.32
  10  -7   1   -0.22    0.33
  10  -7   1    0.50    0.36
 -10  -7  -1    1.01    0.40
  10  -7   1    0.84    0.46
 -10  -7  -1    0.64    0.32
 -10   7  -1    0.21    0.38
  10   7   1   -0.08    0.38
  10   7   1    0.65    0.42
 -10   7  -1    0.12    0.33
  11  -7   1    2.23    0.60
 -11  -7  -1    3.10    0.63
 -11  -7  -1    3.36    0.55
  11  -7   1    2.92    0.66
 -11  -7  -1    2.96    0.52
 -11   7  -1    3.94    0.75
  11   7   1    2.08    0.61
  11   7   1    3.76    0.75
 -11   7  -1    1.24    0.55
  11  -8  -1    0.29    0.48
 -11  -8   1    0.48    0.35
  11  -8  -1    0.07    0.45
  11  -8  -1   -0.25    0.38
  11   8  -1    0.04    0.45
  11   8  -1   -0.34    0.36
 -11   8   1   -0.35    0.41
 -11   8   1   -0.32    0.40
 -10  -8   1   -0.22    0.25
 -10  -8   1   -0.19    0.30
  10  -8  -1   -0.37    0.33
  10  -8  -1    0.02    0.33
  10  -8  -1    0.23    0.34
 -10  -8   1    0.33    0.29
  10   8  -1   -0.52    0.37
  10   8  -1   -0.06    0.38
 -10   8   1   -0.24    0.32
 -10   8   1    0.23    0.38
  -9  -8   1    2.50    0.43
   9  -8  -1    1.86    0.48
  -9  -8   1    2.48    0.46
   9  -8  -1    1.49    0.52
  -9  -8   1    2.49    0.45
   9  -8  -1    2.29    0.42
  -9  -8   1    2.92    0.40
  -9   8   1    4.27    0.64
  -9   8   1    1.82    0.43
   9   8  -1    2.46    0.53
   9   8  -1    1.75    0.53
   8  -8  -1    7.19    0.60
  -8  -8   1    8.77    0.68
  -8  -8   1    8.69    0.56
   8  -8  -1    9.53    0.71
   8  -8  -1    8.80    0.83
  -8  -8   1    7.18    0.57
  -8  -8   1    8.85    0.60
   8   8  -1    8.36    0.70
  -8   8   1    8.71    0.69
  -8   8   1    8.29    0.79
   8   8  -1    7.68    0.83
  -7  -8   1    5.63    0.53
  -7  -8   1    6.00    0.55
   7  -8  -1    5.55    0.59
  -7  -8   1    4.84    0.47
  -7  -8   1    4.77    0.45
   7  -8  -1    4.91    0.60
   7  -8  -1    4.99    0.49
  -7   8   1    4.85    0.56
   7   8  -1    3.98    0.58
   7   8  -1    5.25    0.58
  -7   8   1    4.26    0.51
   6  -8  -1    2.92    0.41
  -6  -8   1    3.52    0.42
  -6  -8   1    4.95    0.44
   6  -8  -1    4.03    0.26
   6  -8  -1    3.14    0.36
   6  -8  -1    3.18    0.46
  -6  -8   1    4.19    0.44
  -6  -8   1    4.07    0.34
   6   8  -1    4.42    0.49
  -6   8   1    3.63    0.44
  -6   8   1    3.16    0.44
   6   8  -1    3.17    0.50
  -5  -8   1    3.63    0.36
   5  -8  -1    3.92    0.26
  -5  -8   1    2.77    0.28
   5  -8  -1    3.16    0.32
  -5  -8   1    3.95    0.40
  -5  -8   1    4.07    0.34
   5  -8  -1    3.54    0.42
   5  -8  -1    3.79    0.46
   5   8  -1    3.20    0.45
  -5   8   1    4.29    0.48
   5   8  -1    4.08    0.33
  -5   8   1    3.61    0.41
   5   8  -1    3.61    0.42
  -4  -8   1    2.44    0.28
   4  -8  -1    2.73    0.36
   4  -8  -1    2.17    0.22
   4  -8  -1    2.44    0.26
  -4  -8   1    1.87    0.28
  -4  -8   1    2.67    0.29
  -4  -8   1    2.53    0.21
   4   8  -1    2.44    0.32
  -4   8   1    2.51    0.35
  -4   8   1    2.88    0.33
   4   8  -1    2.20    0.23
   4   8  -1    2.32    0.38
   4   8  -1    2.77    0.28
   3  -8  -1    1.77    0.22
  -3  -8   1    2.21    0.28
   3  -8  -1    2.43    0.22
  -3  -8   1    1.98    0.26
  -3  -8   1    2.09    0.15
  -3  -8   1    2.48    0.29
   3  -8  -1    2.20    0.30
  -3  -8   1    2.08    0.24
   3  -8  -1    2.17    0.24
   3   8  -1    2.20    0.26
  -3   8   1    2.19    0.26
  -3   8   1    2.67    0.33
   3   8  -1    2.39    0.23
   3   8  -1    1.99    0.33
   3   8  -1    1.78    0.27
  -2  -8   1   11.75    0.52
   2  -8  -1   12.04    0.45
  -2  -8   1   12.81    0.53
  -2  -8   1   12.03    0.46
   2  -8  -1   11.36    0.46
   2  -8  -1   12.69    0.57
  -2  -8   1   11.40    0.50
   2   8  -1   11.63    0.44
   2   8  -1   12.32    0.53
  -2   8   1   11.80    0.46
  -2   8   1   11.74    0.56
   2   8  -1   11.11    0.60
  -1  -8   1  100.38    2.42
  -1  -8   1  101.62    2.45
   1  -8  -1  102.96    2.52
  -1  -8   1   99.68    2.31
   1  -8  -1  102.12    2.37
   1  -8  -1  100.92    2.33
   1  -8  -1  104.13    2.35
   1  -8  -1  103.08    2.41
  -1  -8   1  101.10    2.48
   1   8  -1  101.85    2.61
  -1   8   1  101.28    2.31
  -1   8   1  101.54    2.45
   1   8  -1  104.69    2.34
   1   8  -1  100.32    2.43
   0  -8   1    0.05    0.12
   0  -8   1   -0.08    0.10
   0  -8   1    0.20    0.13
   0  -8  -1    0.02    0.07
   0  -8  -1    0.08    0.12
   0  -8   1    0.30    0.08
   0  -8  -1    0.15    0.10
   0  -8  -1    0.14    0.08
   0  -8  -1    0.12    0.13
   0   8  -1    0.00    0.13
   0   8   1    0.03    0.11
   0   8  -1    0.02    0.14
   0   8   1    0.13    0.15
   0   8  -1    0.19    0.06
   0   8   1    0.17    0.06
   0   8  -1    0.10    0.06
   1  -8   1    0.28    0.12
   1  -8   1    0.36    0.13
  -1  -8  -1    0.08    0.11
   1  -8   1    0.15    0.14
  -1  -8  -1    0.35    0.12
   1  -8   1    0.15    0.06
  -1  -8  -1    0.33    0.11
  -1  -8  -1    0.22    0.15
   1   8   1    0.33    0.13
  -1   8  -1    0.52    0.20
   1   8   1    0.31    0.17
  -1   8  -1    0.02    0.07
  -1   8  -1    0.21    0.10
  -1   8  -1    0.36    0.16
   2  -8   1    6.14    0.34
  -2  -8  -1    5.04    0.18
   2  -8   1    5.45    0.33
   2  -8   1    5.92    0.39
  -2  -8  -1    5.09    0.28
  -2  -8  -1    5.87    0.37
  -2  -8  -1    4.86    0.30
  -2  -8  -1    5.43    0.33
   2   8   1    5.08    0.30
   2   8   1    5.27    0.40
  -2   8  -1    5.22    0.30
  -2   8  -1    4.82    0.38
  -3  -8  -1    2.31    0.17
   3  -8   1    2.16    0.30
   3  -8   1    2.67    0.28
  -3  -8  -1    2.63    0.27
   3  -8   1    2.33    0.34
   3  -8   1    2.93    0.27
  -3  -8  -1    2.77    0.29
  -3  -8  -1    2.25    0.18
  -3  -8  -1    2.30    0.27
  -3   8  -1    3.09    0.27
   3   8   1    2.89    0.37
   3   8   1    2.79    0.24
  -3   8  -1    2.37    0.28
  -3   8  -1    2.07    0.32
   3   8   1    2.67    0.34
  -4  -8  -1    4.89    0.37
   4  -8   1    3.98    0.42
  -4  -8  -1    5.19    0.30
   4  -8   1    5.18    0.37
   4  -8   1    4.88    0.32
  -4  -8  -1    5.36    0.28
   4  -8   1    5.20    0.51
  -4  -8  -1    5.00    0.36
  -4  -8  -1    5.67    0.37
   4   8   1    5.34    0.51
  -4   8  -1    5.51    0.41
  -4   8  -1    5.10    0.35
   4   8   1    5.41    0.25
  -4   8  -1    4.91    0.48
   4   8   1    3.98    0.46
  -5  -8  -1   -0.03    0.15
  -5  -8  -1   -0.09    0.13
  -5  -8  -1    0.13    0.12
   5  -8   1    0.03    0.18
   5  -8   1   -0.10    0.13
   5  -8   1   -0.01    0.20
  -5  -8  -1    0.18    0.16
   5  -8   1    0.15    0.15
  -5  -8  -1   -0.11    0.15
  -5   8  -1   -0.28    0.16
   5   8   1    0.28    0.24
   5   8   1   -0.21    0.19
  -5   8  -1    0.08    0.17
  -6  -8  -1   15.59    0.71
   6  -8   1   15.29    0.73
   6  -8   1   15.84    0.61
   6  -8   1   14.58    0.80
  -6  -8  -1   14.69    0.66
  -6  -8  -1   13.84    0.60
  -6  -8  -1   15.82    0.75
   6  -8   1   15.28    0.85
  -6  -8  -1   15.41    0.71
  -6   8  -1   14.68    0.80
  -6   8  -1   14.96    0.78
   6   8   1   15.06    0.84
   6   8   1   14.08    0.79
   7  -8   1    0.42    0.27
  -7  -8  -1    0.25    0.24
   7  -8   1    0.29    0.16
  -7  -8  -1    0.18    0.20
   7  -8   1    0.24    0.23
  -7  -8  -1   -0.13    0.19
   7  -8   1    0.46    0.31
  -7  -8  -1    0.09    0.21
  -7  -8  -1    0.21    0.18
  -7   8  -1    0.34    0.24
   7   8   1   -0.01    0.26
  -7   8  -1    0.16    0.23
   7   8   1    0.14    0.33
   8  -8   1   -0.19    0.27
  -8  -8  -1    0.03    0.24
   8  -8   1   -0.25    0.23
  -8  -8  -1   -0.15    0.19
   8  -8   1    0.15    0.25
  -8  -8  -1   -0.25    0.17
  -8  -8  -1    0.15    0.27
  -8  -8  -1   -0.55    0.18
  -8   8  -1   -0.02    0.26
  -8   8  -1    0.19    0.28
   8   8   1    0.05    0.30
   8   8   1   -0.20    0.26
   9  -8   1   -0.05    0.29
  -9  -8  -1   -0.21    0.20
  -9  -8  -1   -0.26    0.24
  -9  -8  -1   -0.13    0.26
   9  -8   1    0.31    0.31
   9  -8   1    0.32    0.38
  -9  -8  -1   -0.09    0.32
  -9  -8  -1    0.00    0.28
  -9   8  -1   -0.09    0.32
   9   8   1   -0.12    0.33
  -9   8  -1   -0.35    0.30
   9   8   1   -0.21    0.39
 -10  -8  -1    0.25    0.35
  10  -8   1   -0.17    0.32
  10  -8   1   -0.20    0.33
  10  -8   1    0.90    0.46
 -10  -8  -1    0.11    0.29
 -10  -8  -1    0.03    0.27
  10   8   1   -0.01    0.36
 -10   8  -1    0.75    0.40
 -10   8  -1   -0.09    0.35
  10   8   1    0.44    0.45
  11  -8   1    0.74    0.45
 -11  -8  -1    0.27    0.36
  11  -8   1   -0.37    0.43
 -11   8  -1   -0.34    0.42
 -11   8  -1   -0.19    0.45
 -11   8  -1   -0.31    0.38
  11   8   1   -0.79    0.43
  11   8   1   -1.04    0.46
  11  -9  -1    0.38    0.44
  11  -9  -1    0.03    0.42
 -11  -9   1    0.17    0.32
  11  -9  -1   -0.04    0.43
  11   9  -1    0.35    0.52
 -11   9   1    0.13    0.41
  11   9  -1    0.06    0.47
 -11   9   1    0.56    0.48
  10  -9  -1    0.95    0.45
  10  -9  -1    0.28    0.40
 -10  -9   1    0.48    0.32
  10  -9  -1    0.76    0.41
 -10   9   1    0.60    0.44
  10   9  -1    0.56    0.42
  10   9  -1    0.12    0.44
 -10   9   1    1.06    0.47
   9  -9  -1    0.60    0.36
  -9  -9   1    1.04    0.29
   9  -9  -1    0.24    0.35
  -9  -9   1    0.70    0.37
  -9  -9   1    0.74    0.27
   9  -9  -1    0.60    0.34
  -9  -9   1    0.11    0.26
  -9  -9   1    0.84    0.36
  -9   9   1    0.68    0.35
  -9   9   1    0.93    0.44
   9   9  -1    1.45    0.43
   9   9  -1    0.46    0.43
  -8  -9   1    2.79    0.45
   8  -9  -1    2.44    0.42
   8  -9  -1    2.10    0.48
  -8  -9   1    2.88    0.40
  -8  -9   1    1.78    0.34
   8  -9  -1    2.54    0.49
  -8  -9   1    3.23    0.46
  -8   9   1    2.80    0.52
  -8   9   1    1.93    0.44
   8   9  -1    3.51    0.52
   8   9  -1    3.21    0.61
  -7  -9   1   12.41    0.65
  -7  -9   1   13.53    0.76
   7  -9  -1   12.58    0.85
  -7  -9   1   11.51    0.68
   7  -9  -1   11.45    0.68
   7  -9  -1   11.59    0.76
  -7  -9   1   12.78    0.63
   7   9  -1   13.47    0.89
  -7   9   1   12.07    0.78
  -7   9   1   11.69    0.74
   7   9  -1   10.78    0.74
   6  -9  -1    9.08    0.41
   6  -9  -1    9.95    0.57
   6  -9  -1   10.02    0.72
   6  -9  -1    9.00    0.66
  -6  -9   1    8.48    0.47
  -6  -9   1    9.85    0.56
  -6  -9   1    9.61    0.61
  -6  -9   1   11.18    0.59
  -6   9   1   11.11    0.66
   6   9  -1    9.27    0.65
   6   9  -1    9.09    0.73
  -6   9   1    8.77    0.63
  -5  -9   1    0.23    0.16
   5  -9  -1    0.28    0.16
  -5  -9   1    0.15    0.18
  -5  -9   1    0.11    0.13
  -5  -9   1   -0.19    0.16
   5  -9  -1   -0.14    0.19
   5  -9  -1    0.09    0.22
   5  -9  -1    0.17    0.13
  -5   9   1    0.22    0.18
   5   9  -1    0.52    0.28
   5   9  -1   -0.02    0.16
  -5   9   1    0.20    0.20
  -4  -9   1    5.89    0.28
  -4  -9   1    5.13    0.36
   4  -9  -1    5.58    0.32
  -4  -9   1    6.21    0.44
   4  -9  -1    6.09    0.49
   4  -9  -1    6.19    0.39
   4   9  -1    6.02    0.38
  -4   9   1    5.80    0.41
   4   9  -1    5.60    0.51
  -4   9   1    5.28    0.51
   4   9  -1    6.30    0.36
   4   9  -1    5.34    0.56
   3  -9  -1    1.53    0.30
   3  -9  -1    1.47    0.21
  -3  -9   1    1.73    0.26
   3  -9  -1    1.47    0.20
  -3  -9   1    1.58    0.23
  -3  -9   1    1.58    0.10
   3  -9  -1    1.42    0.20
  -3  -9   1    1.65    0.26
  -3  -9   1    1.38    0.11
  -3  -9   1    2.13    0.29
  -3   9   1    1.98    0.32
   3   9  -1    1.73    0.30
   3   9  -1    1.84    0.34
  -3   9   1    1.30    0.22
   3   9  -1    1.59    0.25
   3   9  -1    1.70    0.21
  -2  -9   1    4.90    0.35
  -2  -9   1    4.64    0.33
  -2  -9   1    4.43    0.33
   2  -9  -1    4.11    0.28
  -2  -9   1    4.11    0.28
   2  -9  -1    4.07    0.28
   2  -9  -1    3.99    0.39
   2   9  -1    4.32    0.33
  -2   9   1    4.72    0.37
   2   9  -1    4.77    0.31
   2   9  -1    3.76    0.42
  -2   9   1    4.03    0.27
  -1  -9   1    6.26    0.38
  -1  -9   1    7.04    0.42
   1  -9  -1    6.99    0.37
  -1  -9   1    7.80    0.40
   1  -9  -1    7.12    0.33
   1  -9  -1    6.86    0.34
   1  -9  -1    6.60    0.42
  -1  -9   1    6.66    0.32
  -1   9   1    7.29    0.29
   1   9  -1    7.03    0.41
  -1   9   1    6.26    0.41
   1   9  -1    6.67    0.46
   0  -9  -1   19.53    0.64
   0  -9  -1   19.62    0.61
   0  -9  -1   19.90    0.70
   0  -9  -1   18.53    0.74
   0  -9   1   20.10    0.69
   0  -9   1   20.14    0.75
   0  -9  -1   20.15    0.59
   0  -9   1   19.86    0.57
   0  -9   1   21.03    0.72
   0   9  -1   19.17    0.49
   0   9  -1   19.75    0.75
   0   9   1   21.00    0.73
   0   9  -1   19.84    0.51
   0   9  -1   19.75    0.80
   0   9   1   20.55    0.51
   0   9   1   19.90    0.82
   1  -9   1   16.57    0.67
   1  -9   1   15.87    0.61
  -1  -9  -1   16.13    0.58
   1  -9   1   16.41    0.62
   1  -9   1   16.13    0.43
  -1  -9  -1   16.98    0.67
  -1  -9  -1   16.39    0.55
  -1  -9  -1   16.26    0.63
  -1   9  -1   15.67    0.51
  -1   9  -1   15.07    0.67
   1   9   1   16.73    0.62
  -1   9  -1   16.33    0.49
  -1   9  -1   15.76    0.71
   1   9   1   15.54    0.71
  -2  -9  -1   22.89    0.74
  -2  -9  -1   22.11    0.75
  -2  -9  -1   22.36    0.70
   2  -9   1   22.50    0.76
   2  -9   1   22.30    0.86
  -2  -9  -1   20.74    0.80
   2  -9   1   23.06    0.77
  -2   9  -1   22.04    0.72
   2   9   1   21.00    0.88
  -2   9  -1   23.05    0.89
   2   9   1   23.38    0.74
  -3  -9  -1    0.08    0.07
  -3  -9  -1    0.20    0.18
   3  -9   1    0.14    0.12
   3  -9   1    0.05    0.17
  -3  -9  -1    0.15    0.14
   3  -9   1    0.06    0.13
  -3  -9  -1    0.22    0.13
   3   9   1    0.14    0.17
   3   9   1    0.13    0.13
   3   9   1    0.09    0.18
  -3   9  -1    0.35    0.14
  -3   9  -1    0.08    0.17
  -4  -9  -1    0.67    0.15
   4  -9   1    0.54    0.15
   4  -9   1    0.29    0.16
  -4  -9  -1    0.45    0.19
   4  -9   1    0.63    0.25
  -4  -9  -1    0.51    0.12
  -4  -9  -1    0.37    0.18
   4  -9   1    0.54    0.24
  -4  -9  -1    0.77    0.21
   4   9   1    0.41    0.21
   4   9   1    0.04    0.19
  -4   9  -1    0.72    0.22
   4   9   1    0.29    0.13
  -4   9  -1    0.75    0.27
   5  -9   1   11.94    0.62
   5  -9   1   12.07    0.69
   5  -9   1   11.69    0.52
  -5  -9  -1   11.31    0.51
  -5  -9  -1   11.02    0.47
  -5  -9  -1   11.93    0.60
   5  -9   1   12.15    0.73
  -5  -9  -1   11.96    0.61
  -5  -9  -1   10.94    0.60
   5   9   1   11.02    0.66
  -5   9  -1   11.04    0.63
  -5   9  -1   12.36    0.71
   5   9   1   12.29    0.73
  -6  -9  -1   20.53    0.86
   6  -9   1   19.90    0.96
  -6  -9  -1   20.88    0.87
  -6  -9  -1   19.92    0.78
  -6  -9  -1   20.35    0.89
   6  -9   1   20.45    1.02
   6  -9   1   20.18    0.73
  -6  -9  -1   21.02    0.74
   6  -9   1   21.05    0.90
  -6   9  -1   21.39    1.01
   6   9   1   20.78    1.03
  -6   9  -1   18.72    0.91
   6   9   1   20.47    0.98
   7  -9   1    0.02    0.12
  -7  -9  -1    0.18    0.20
  -7  -9  -1    0.01    0.23
  -7  -9  -1    0.08    0.21
  -7  -9  -1    0.35    0.22
  -7  -9  -1   -0.01    0.14
   7  -9   1    0.11    0.27
   7  -9   1   -0.37    0.19
   7  -9   1   -0.13    0.26
  -7   9  -1    0.15    0.25
  -7   9  -1   -0.05    0.24
   7   9   1    0.15    0.29
   7   9   1    0.07    0.31
  -8  -9  -1    0.51    0.28
   8  -9   1    0.66    0.37
   8  -9   1    1.07    0.37
  -8  -9  -1    0.33    0.31
  -8  -9  -1    0.88    0.26
  -8  -9  -1    0.62    0.27
   8  -9   1    0.44    0.30
  -8  -9  -1    0.75    0.28
  -8   9  -1    0.74    0.34
   8   9   1    0.15    0.33
   8   9   1    0.89    0.39
  -8   9  -1   -0.03    0.27
   9  -9   1    6.34    0.68
  -9  -9  -1    5.88    0.64
  -9  -9  -1    6.33    0.62
   9  -9   1    7.16    0.82
  -9  -9  -1    7.01    0.55
  -9  -9  -1    6.45    0.68
   9  -9   1    6.83    0.85
  -9  -9  -1    6.57    0.66
  -9   9  -1    5.73    0.78
  -9   9  -1    5.83    0.73
   9   9   1    5.84    0.78
   9   9   1    7.02    0.82
  10  -9   1    0.12    0.41
 -10  -9  -1    0.33    0.30
  10  -9   1   -0.02    0.34
  10  -9   1    0.42    0.37
 -10   9  -1    0.31    0.41
 -10   9  -1   -0.48    0.39
  10   9   1   -0.75    0.42
  10   9   1   -0.12    0.36
  10 -10  -1   -0.16    0.36
  10 -10  -1   -0.43    0.34
  10 -10  -1    0.30    0.44
 -10 -10   1    0.71    0.36
  10  10  -1    0.82    0.40
 -10  10   1    0.03    0.40
  10  10  -1    0.31    0.45
 -10  10   1    0.10    0.35
   9 -10  -1    2.16    0.55
   9 -10  -1    2.70    0.49
  -9 -10   1    1.82    0.48
  -9 -10   1    2.59    0.41
   9 -10  -1    1.42    0.45
  -9 -10   1    2.25    0.44
   9  10  -1    1.95    0.63
  -9  10   1    2.73    0.59
   9  10  -1    2.29    0.51
  -9  10   1    2.32    0.55
   8 -10  -1    1.23    0.44
   8 -10  -1    0.42    0.29
  -8 -10   1    0.55    0.25
   8 -10  -1    0.82    0.37
  -8 -10   1   -0.31    0.26
  -8 -10   1    0.16    0.22
  -8  10   1    0.62    0.37
  -8  10   1    0.33    0.32
   8  10  -1    0.54    0.40
   8  10  -1    0.50    0.31
  -7 -10   1    0.27    0.27
   7 -10  -1    0.39    0.31
   7 -10  -1    0.48    0.25
  -7 -10   1    0.11    0.22
  -7 -10   1    0.33    0.17
  -7 -10   1   -0.03    0.19
  -7 -10   1    0.38    0.24
   7 -10  -1   -0.12    0.24
  -7  10   1    0.27    0.25
   7  10  -1    0.10    0.25
  -7  10   1    0.41    0.31
   7  10  -1   -0.29    0.28
   6 -10  -1    0.25    0.13
  -6 -10   1   -0.10    0.18
  -6 -10   1    0.26    0.14
  -6 -10   1    0.11    0.19
   6 -10  -1    0.03    0.18
   6 -10  -1    0.29    0.26
  -6 -10   1    0.35    0.18
  -6 -10   1    0.23    0.21
   6  10  -1    0.76    0.29
  -6  10   1    0.45    0.28
  -6  10   1    0.67    0.28
   6  10  -1    0.25    0.30
  -5 -10   1    5.56    0.28
   5 -10  -1    5.44    0.47
  -5 -10   1    4.97    0.31
  -5 -10   1    4.99    0.46
   5 -10  -1    5.10    0.54
  -5 -10   1    4.38    0.46
  -5 -10   1    5.51    0.43
   5 -10  -1    4.81    0.31
  -5  10   1    4.50    0.52
   5  10  -1    4.85    0.58
  -5  10   1    4.86    0.49
   5  10  -1    4.93    0.40
   5  10  -1    5.65    0.56
  -4 -10   1    0.04    0.07
   4 -10  -1    0.24    0.13
   4 -10  -1    0.13    0.15
  -4 -10   1    0.11    0.17
   4 -10  -1    0.02    0.18
  -4 -10   1    0.01    0.13
  -4 -10   1   -0.11    0.08
   4  10  -1    0.00    0.20
   4  10  -1    0.20    0.17
  -4  10   1    0.12    0.16
   4  10  -1    0.09    0.20
  -4  10   1   -0.15    0.17
  -3 -10   1   -0.22    0.13
   3 -10  -1    0.12    0.15
   3 -10  -1   -0.09    0.12
   3 -10  -1    0.14    0.12
  -3 -10   1   -0.08    0.15
   3 -10  -1    0.12    0.13
  -3 -10   1    0.11    0.12
  -3 -10   1    0.21    0.15
   3  10  -1    0.16    0.17
  -3  10   1    0.12    0.14
  -3  10   1    0.39    0.20
   3  10  -1    0.17    0.20
  -2 -10   1   14.66    0.62
   2 -10  -1   11.95    0.64
   2 -10  -1   13.89    0.56
  -2 -10   1   13.14    0.60
  -2 -10   1   14.87    0.65
   2 -10  -1   13.56    0.37
  -2 -10   1   14.78    0.54
   2 -10  -1   14.33    0.55
  -2  10   1   13.83    0.52
   2  10  -1   14.85    0.75
  -2  10   1   14.12    0.68
   2  10  -1   13.68    0.61
  -1 -10   1    3.45    0.36
   1 -10  -1    3.50    0.28
  -1 -10   1    3.63    0.33
  -1 -10   1    3.40    0.33
   1 -10  -1    3.38    0.25
   1 -10  -1    3.89    0.29
   1 -10  -1    3.25    0.37
  -1 -10   1    3.49    0.23
  -1  10   1    3.77    0.22
   1  10  -1    3.69    0.43
  -1  10   1    4.05    0.41
  -1  10   1    3.84    0.43
   1  10  -1    4.08    0.39
   0 -10   1   18.16    0.74
   0 -10  -1   18.07    0.56
   0 -10  -1   16.83    0.66
   0 -10  -1   16.27    0.58
   0 -10  -1   17.75    0.63
   0 -10   1   17.80    0.53
   0 -10   1   17.78    0.69
   0 -10  -1   17.96    0.74
   0 -10   1   18.30    0.67
   0  10   1   17.97    0.72
   0  10  -1   17.76    0.74
   0  10   1   17.68    0.46
   0  10  -1   17.58    0.44
   0  10   1   18.13    0.80
   0  10  -1   18.97    0.81
  -1 -10  -1    0.78    0.18
  -1 -10  -1    0.44    0.19
   1 -10   1    0.63    0.18
  -1 -10  -1    0.62    0.14
   1 -10   1    0.61    0.17
   1 -10   1    0.46    0.18
   1 -10   1    0.51    0.09
  -1 -10  -1    0.33    0.14
   1  10   1    0.48    0.17
  -1  10  -1    0.66    0.22
   1  10   1    0.62    0.21
  -1  10  -1    0.61    0.11
  -1  10  -1    0.73    0.22
  -1  10  -1    0.72    0.13
   2 -10   1    2.21    0.27
  -2 -10  -1    2.33    0.27
  -2 -10  -1    2.34    0.26
  -2 -10  -1    2.20    0.30
   2 -10   1    2.63    0.29
  -2 -10  -1    2.14    0.23
   2 -10   1    2.23    0.32
  -2  10  -1    2.02    0.34
   2  10   1    2.44    0.28
   2  10   1    1.99    0.34
  -2  10  -1    2.11    0.24
  -3 -10  -1    0.46    0.07
  -3 -10  -1    0.53    0.21
  -3 -10  -1    0.42    0.16
  -3 -10  -1    0.24    0.16
  -3 -10  -1    0.72    0.20
   3 -10   1    0.18    0.15
   3 -10   1    0.38    0.16
   3 -10   1    0.52    0.21
  -3  10  -1    0.50    0.22
   3  10   1    0.87    0.29
  -3  10  -1    0.60    0.17
   3  10   1    0.19    0.19
   3  10   1    0.40    0.17
   4 -10   1    2.27    0.32
  -4 -10  -1    2.03    0.28
  -4 -10  -1    2.19    0.19
  -4 -10  -1    2.18    0.21
  -4 -10  -1    1.97    0.30
   4 -10   1    2.45    0.29
  -4 -10  -1    1.99    0.28
   4 -10   1    2.15    0.37
   4  10   1    2.22    0.40
  -4  10  -1    1.71    0.34
   4  10   1    2.64    0.25
  -4  10  -1    2.23    0.31
   4  10   1    2.33    0.39
  -5 -10  -1    6.04    0.33
  -5 -10  -1    5.84    0.36
  -5 -10  -1    6.93    0.48
   5 -10   1    5.74    0.63
   5 -10   1    7.28    0.51
   5 -10   1    6.49    0.64
  -5 -10  -1    7.14    0.51
  -5 -10  -1    5.81    0.45
   5 -10   1    6.02    0.40
   5  10   1    5.94    0.60
  -5  10  -1    5.08    0.56
  -5  10  -1    6.51    0.48
   5  10   1    6.18    0.64
   6 -10   1    5.00    0.62
   6 -10   1    5.26    0.51
  -6 -10  -1    4.87    0.35
  -6 -10  -1    5.04    0.38
  -6 -10  -1    5.64    0.54
   6 -10   1    4.99    0.38
  -6 -10  -1    6.11    0.47
   6 -10   1    5.30    0.60
  -6 -10  -1    5.78    0.56
   6  10   1    5.56    0.61
  -6  10  -1    5.34    0.61
   6  10   1    5.71    0.69
  -6  10  -1    4.83    0.53
  -7 -10  -1    2.04    0.30
  -7 -10  -1    2.19    0.37
   7 -10   1    1.25    0.33
   7 -10   1    2.41    0.49
  -7 -10  -1    1.64    0.33
   7 -10   1    2.08    0.42
  -7 -10  -1    2.48    0.35
  -7 -10  -1    2.68    0.44
   7 -10   1    2.70    0.32
  -7  10  -1    2.34    0.44
  -7  10  -1    1.66    0.42
   7  10   1    2.27    0.44
   7  10   1    1.95    0.46
   8 -10   1    0.51    0.35
  -8 -10  -1    0.25    0.26
   8 -10   1    0.18    0.25
  -8 -10  -1    0.22    0.24
  -8 -10  -1    0.13    0.25
   8 -10   1    0.08    0.32
  -8  10  -1   -0.19    0.30
  -8  10  -1    0.02    0.30
   8  10   1   -0.08    0.38
   8  10   1   -0.10    0.32
   9 -10   1    0.07    0.35
   9 -10   1    0.34    0.32
   9 -10   1    0.18    0.37
  -9 -10  -1    0.31    0.35
  -9 -10  -1    0.11    0.26
  -9 -10  -1    0.49    0.30
   9  10   1   -0.22    0.34
  -9  10  -1    0.23    0.36
  -9  10  -1   -0.04    0.33
   9  10   1   -0.26    0.42
 -10 -10  -1    0.59    0.35
 -10 -10  -1    0.31    0.29
  10 -10   1   -0.11    0.37
  10 -10   1    0.60    0.40
  10 -10   1   -0.21    0.42
  10  10   1    0.39    0.48
 -10  10  -1   -0.53    0.39
 -10  10  -1    0.82    0.39
  10  10   1   -0.48    0.41
 -10 -11   1   -0.16    0.29
  10 -11  -1    0.13    0.38
  10 -11  -1   -0.32    0.47
  10 -11  -1    0.75    0.54
  10  11  -1    0.49    0.51
  10  11  -1    0.71    0.49
 -10  11   1    0.39    0.47
 -10  11   1    0.60    0.46
  -9 -11   1    0.25    0.27
   9 -11  -1    0.44    0.40
   9 -11  -1   -0.12    0.34
   9 -11  -1    0.07    0.31
  -9 -11   1   -0.21    0.25
  -9 -11   1    0.44    0.33
   9  11  -1    0.38    0.36
  -9  11   1    0.10    0.37
  -9  11   1   -0.52    0.34
   9  11  -1    0.36    0.38
   8 -11  -1    0.06    0.35
  -8 -11   1    0.34    0.25
  -8 -11   1    0.82    0.30
   8 -11  -1    0.16    0.33
  -8 -11   1    0.68    0.34
   8 -11  -1    0.98    0.34
   8  11  -1   -0.01    0.31
   8  11  -1    0.40    0.40
  -8  11   1    0.83    0.41
  -8  11   1    0.48    0.33
  -7 -11   1    2.46    0.40
   7 -11  -1    2.61    0.51
   7 -11  -1    2.43    0.40
  -7 -11   1    2.51    0.45
  -7 -11   1    2.36    0.38
   7  11  -1    2.66    0.47
   7  11  -1    2.17    0.49
  -7  11   1    2.41    0.44
  -7  11   1    2.04    0.45
   6 -11  -1    4.02    0.53
  -6 -11   1    5.19    0.53
  -6 -11   1    4.26    0.46
   6 -11  -1    4.26    0.46
  -6 -11   1    3.41    0.45
   6 -11  -1    4.18    0.32
   6  11  -1    4.64    0.64
  -6  11   1    4.30    0.49
  -6  11   1    3.91    0.54
   6  11  -1    4.42    0.56
  -5 -11   1   -0.06    0.19
   5 -11  -1    0.00    0.16
   5 -11  -1    0.00    0.13
  -5 -11   1    0.13    0.19
  -5 -11   1    0.17    0.20
   5 -11  -1    0.10    0.23
  -5  11   1    0.28    0.21
   5  11  -1    0.31    0.19
  -5  11   1    0.13    0.23
   5  11  -1    0.00    0.27
   5  11  -1    0.04    0.22
   4 -11  -1    0.29    0.17
   4 -11  -1    0.51    0.23
  -4 -11   1    0.26    0.21
  -4 -11   1    0.31    0.16
   4 -11  -1    0.50    0.16
   4  11  -1    0.30    0.24
  -4  11   1    0.46    0.19
   4  11  -1    0.44    0.19
   4  11  -1    0.30    0.26
  -4  11   1    0.48    0.25
  -3 -11   1    2.92    0.32
   3 -11  -1    2.57    0.29
  -3 -11   1    2.45    0.32
  -3 -11   1    2.73    0.33
  -3 -11   1    3.18    0.38
   3 -11  -1    2.52    0.28
   3  11  -1    2.61    0.35
   3  11  -1    2.12    0.38
  -3  11   1    2.53    0.30
  -3  11   1    3.19    0.42
   2 -11  -1    0.69    0.17
   2 -11  -1    0.39    0.15
   2 -11  -1    0.08    0.11
   2 -11  -1    0.59    0.08
  -2 -11   1    0.69    0.17
  -2 -11   1    0.93    0.21
  -2 -11   1    0.83    0.21
  -2 -11   1    0.44    0.20
   2 -11  -1    0.52    0.20
   2  11  -1    0.61    0.21
  -2  11   1    0.72    0.16
  -2  11   1    0.97    0.26
   2  11  -1    0.59    0.24
  -1 -11   1    7.68    0.46
   1 -11  -1    8.69    0.54
  -1 -11   1    8.17    0.37
  -1 -11   1    7.97    0.47
   1 -11  -1    8.78    0.34
  -1 -11   1    8.50    0.51
   1 -11  -1    8.41    0.45
   1 -11  -1    7.64    0.41
  -1  11   1    8.10    0.33
   1  11  -1    8.24    0.57
  -1  11   1    6.98    0.53
  -1  11   1    9.37    0.55
   1  11  -1    7.86    0.49
   0 -11   1    7.20    0.44
   0 -11   1    6.22    0.44
   0 -11  -1    7.52    0.44
   0 -11  -1    6.90    0.48
   0 -11  -1    7.44    0.33
   0 -11  -1    6.74    0.39
   0 -11   1    7.47    0.44
   0 -11   1    7.24    0.31
   0  11  -1    6.38    0.49
   0  11  -1    6.93    0.47
   0  11   1    7.72    0.46
   0  11   1    6.89    0.22
   0  11   1    6.55    0.50
  -1 -11  -1    8.27    0.50
  -1 -11  -1    7.77    0.46
  -1 -11  -1    7.84    0.39
  -1 -11  -1    7.90    0.43
   1 -11   1    7.72    0.51
   1 -11   1    7.81    0.45
   1 -11   1    7.59    0.44
   1 -11   1    7.88    0.28
  -1  11  -1    7.53    0.54
   1  11   1    7.96    0.54
  -1  11  -1    7.78    0.31
   1  11   1    7.71    0.46
  -1  11  -1    8.56    0.35
  -1  11  -1    7.96    0.54
  -2 -11  -1   -0.11    0.13
   2 -11   1   -0.09    0.11
  -2 -11  -1    0.09    0.12
   2 -11   1   -0.30    0.12
  -2 -11  -1    0.13    0.14
  -2 -11  -1   -0.04    0.10
   2 -11   1   -0.08    0.14
  -2  11  -1   -0.21    0.15
   2  11   1   -0.21    0.16
  -2  11  -1    0.03    0.12
  -2  11  -1    0.06    0.11
  -2  11  -1    0.01    0.19
   2  11   1    0.04    0.16
  -3 -11  -1   -0.15    0.16
   3 -11   1    0.11    0.16
  -3 -11  -1    0.08    0.14
  -3 -11  -1   -0.05    0.15
   3 -11   1   -0.05    0.17
  -3 -11  -1    0.13    0.16
   3 -11   1    0.01    0.13
   3  11   1    0.13    0.16
   3  11   1   -0.06    0.20
  -3  11  -1   -0.18    0.14
  -3  11  -1   -0.15    0.18
   3  11   1   -0.30    0.16
  -4 -11  -1    1.78    0.30
   4 -11   1    2.44    0.33
   4 -11   1    2.55    0.32
  -4 -11  -1    2.13    0.31
  -4 -11  -1    1.92    0.32
   4 -11   1    2.46    0.41
   4  11   1    1.56    0.38
   4  11   1    1.65    0.36
   4  11   1    1.84    0.25
  -4  11  -1    1.84    0.30
  -4  11  -1    2.04    0.38
  -5 -11  -1   -0.13    0.19
   5 -11   1    0.36    0.17
  -5 -11  -1    0.48    0.22
   5 -11   1    0.54    0.26
   5 -11   1    0.40    0.22
  -5 -11  -1    0.14    0.17
   5  11   1    0.87    0.30
   5  11   1    0.29    0.28
  -5  11  -1    0.24    0.23
  -5  11  -1    0.79    0.29
   6 -11   1   -0.33    0.23
  -6 -11  -1    0.06    0.22
  -6 -11  -1   -0.02    0.23
   6 -11   1   -0.16    0.30
   6 -11   1    0.03    0.21
   6 -11   1   -0.05    0.16
  -6 -11  -1    0.12    0.22
  -6  11  -1   -0.04    0.24
   6  11   1    0.26    0.29
  -6  11  -1   -0.32    0.20
   6  11   1   -0.07    0.24
  -7 -11  -1    0.87    0.30
   7 -11   1    1.07    0.34
   7 -11   1    0.49    0.38
   7 -11   1    0.63    0.36
  -7 -11  -1    0.92    0.29
  -7 -11  -1    1.03    0.34
  -7  11  -1    1.09    0.36
   7  11   1    0.85    0.39
   7  11   1    0.96    0.40
  -7  11  -1    1.23    0.40
   8 -11   1    4.46    0.60
   8 -11   1    2.83    0.53
  -8 -11  -1    3.64    0.48
   8 -11   1    2.58    0.54
  -8 -11  -1    3.62    0.49
  -8 -11  -1    3.28    0.53
  -8  11  -1    2.28    0.51
   8  11   1    3.25    0.63
   8  11   1    2.77    0.55
  -8  11  -1    3.76    0.62
   9 -11   1    1.32    0.47
   9 -11   1    1.46    0.44
  -9 -11  -1    1.11    0.36
  -9 -11  -1    0.43    0.30
   9 -11   1    0.78    0.47
  -9 -11  -1    0.89    0.45
   9  11   1    1.46    0.56
   9  11   1    1.02    0.45
  -9  11  -1    1.04    0.48
  -9  11  -1    0.73    0.49
  10 -11   1   -0.47    0.36
  10 -11   1    0.07    0.43
 -10 -11  -1   -0.32    0.30
 -10 -11  -1    0.41    0.33
  10 -11   1   -0.03    0.40
  10  11   1    0.22    0.43
 -10  11  -1   -0.39    0.38
  10  11   1    0.00    0.43
 -10  11  -1    0.14    0.34
 -10  11  -1   -0.46    0.37
  10 -12  -1   -0.06    0.39
  10 -12  -1    0.01    0.40
 -10 -12   1   -0.07    0.30
 -10  12   1    0.25    0.41
 -10  12   1    0.09    0.46
  10  12  -1    0.52    0.48
  10  12  -1    0.44    0.53
  -9 -12   1    4.53    0.61
  -9 -12   1    5.40    0.61
   9 -12  -1    6.41    0.71
   9 -12  -1    7.12    0.84
  -9 -12   1    7.25    0.74
   9  12  -1    4.79    0.71
  -9  12   1    4.53    0.73
  -9  12   1    6.43    0.78
   9  12  -1    6.23    0.88
  -8 -12   1    3.62    0.53
   8 -12  -1    3.56    0.52
  -8 -12   1    4.54    0.57
   8 -12  -1    3.96    0.64
  -8 -12   1    5.01    0.64
   8  12  -1    4.19    0.71
  -8  12   1    5.80    0.74
   8  12  -1    4.46    0.66
  -8  12   1    4.66    0.62
  -7 -12   1   -0.36    0.28
  -7 -12   1   -0.04    0.19
  -7 -12   1   -0.16    0.22
   7 -12  -1   -0.06    0.29
   7 -12  -1   -0.05    0.22
  -7  12   1   -0.04    0.24
   7  12  -1    0.19    0.30
  -7  12   1   -0.32    0.28
   7  12  -1    0.01    0.28
   6 -12  -1    1.90    0.35
  -6 -12   1    2.28    0.35
  -6 -12   1    1.85    0.39
   6 -12  -1    1.79    0.26
  -6 -12   1    2.17    0.39
   6 -12  -1    2.74    0.48
   6  12  -1    1.42    0.37
  -6  12   1    2.18    0.41
  -6  12   1    1.66    0.41
   6  12  -1    1.86    0.45
  -5 -12   1   -0.06    0.20
  -5 -12   1    0.05    0.17
   5 -12  -1    0.15    0.24
  -5 -12   1   -0.13    0.19
   5 -12  -1   -0.14    0.18
   5 -12  -1   -0.08    0.14
   5  12  -1    0.20    0.21
  -5  12   1    0.04    0.23
  -5  12   1    0.07    0.21
   5  12  -1   -0.10    0.23
   5  12  -1    0.08    0.27
   4 -12  -1    0.67    0.21
   4 -12  -1    0.63    0.18
  -4 -12   1    0.39    0.23
   4 -12  -1    0.77    0.30
  -4 -12   1    0.36    0.18
   4  12  -1    0.67    0.30
  -4  12   1    0.68    0.29
   4  12  -1    0.55    0.24
   4  12  -1    1.02    0.30
  -4  12   1    0.86    0.24
   3 -12  -1    2.45    0.30
  -3 -12   1    2.33    0.33
  -3 -12   1    2.44    0.34
  -3 -12   1    1.84    0.33
   3 -12  -1    2.37    0.37
   3 -12  -1    2.76    0.31
  -3 -12   1    2.64    0.31
  -3  12   1    2.42    0.40
   3  12  -1    2.60    0.37
  -3  12   1    2.81    0.32
   3  12  -1    2.99    0.44
  -2 -12   1   33.60    1.12
   2 -12  -1   31.98    1.06
  -2 -12   1   33.95    1.17
   2 -12  -1   31.93    1.04
  -2 -12   1   32.40    0.99
  -2 -12   1   32.21    1.12
   2 -12  -1   33.01    1.20
  -2  12   1   34.04    1.22
   2  12  -1   33.27    1.13
   2  12  -1   33.79    1.30
  -2  12   1   31.72    0.95
  -1 -12   1    7.66    0.49
  -1 -12   1    8.35    0.54
  -1 -12   1    8.27    0.39
   1 -12  -1    9.01    0.36
   1 -12  -1    8.06    0.46
  -1 -12   1    8.45    0.50
   1 -12  -1    7.92    0.56
   1 -12  -1    8.68    0.48
  -1  12   1    7.84    0.53
   1  12  -1    7.79    0.59
  -1  12   1    8.42    0.34
  -1  12   1    8.12    0.59
   1  12  -1    8.31    0.53
   0 -12   1    2.88    0.36
   0 -12   1    2.75    0.33
   0 -12   1    3.47    0.36
   0 -12  -1    3.04    0.31
   0 -12   1    2.84    0.22
   0 -12  -1    3.01    0.23
   0 -12  -1    3.29    0.35
   0 -12  -1    3.03    0.40
   0  12   1    2.78    0.35
   0  12   1    3.29    0.45
   0  12  -1    3.10    0.39
   0  12  -1    3.65    0.47
  -1 -12  -1    1.07    0.23
  -1 -12  -1    0.80    0.23
   1 -12   1    0.64    0.22
  -1 -12  -1    0.96    0.17
   1 -12   1    0.85    0.22
   1 -12   1    0.83    0.12
  -1 -12  -1    0.69    0.20
   1 -12   1    0.65    0.19
   1  12   1    0.82    0.23
  -1  12  -1    1.03    0.28
   1  12   1    0.88    0.27
  -1  12  -1    1.08    0.14
  -1  12  -1    0.64    0.26
  -1  12  -1    0.92    0.15
   2 -12   1   14.42    0.67
   2 -12   1   16.02    0.78
  -2 -12  -1   15.50    0.76
  -2 -12  -1   16.11    0.68
   2 -12   1   15.64    0.68
  -2 -12  -1   15.66    0.62
  -2  12  -1   15.33    0.81
  -2  12  -1   14.97    0.80
  -2  12  -1   15.23    0.54
   2  12   1   16.64    0.86
   2  12   1   15.49    0.68
  -2  12  -1   15.70    0.60
  -3 -12  -1    4.20    0.42
   3 -12   1    4.51    0.45
  -3 -12  -1    4.48    0.41
  -3 -12  -1    4.77    0.51
   3 -12   1    5.33    0.53
   3 -12   1    4.97    0.37
  -3 -12  -1    4.36    0.44
   3  12   1    4.85    0.55
  -3  12  -1    4.78    0.54
   3  12   1    5.35    0.39
  -3  12  -1    4.97    0.37
   3  12   1    4.57    0.56
   4 -12   1   -0.25    0.17
  -4 -12  -1    0.34    0.21
  -4 -12  -1    0.00    0.18
  -4 -12  -1    0.31    0.18
   4 -12   1    0.16    0.25
   4 -12   1    0.21    0.17
   4  12   1    0.53    0.30
  -4  12  -1    0.45    0.22
   4  12   1    0.37    0.18
   4  12   1    0.44    0.27
  -4  12  -1    0.44    0.27
  -5 -12  -1    2.03    0.35
   5 -12   1    1.92    0.30
   5 -12   1    1.81    0.34
  -5 -12  -1    2.33    0.39
   5 -12   1    2.11    0.43
  -5 -12  -1    2.52    0.39
  -5  12  -1    1.66    0.40
   5  12   1    1.44    0.38
   5  12   1    1.79    0.43
  -5  12  -1    2.18    0.36
   6 -12   1    3.91    0.39
   6 -12   1    4.36    0.51
  -6 -12  -1    4.05    0.49
   6 -12   1    5.23    0.62
  -6 -12  -1    4.68    0.50
  -6 -12  -1    4.95    0.55
   6  12   1    3.49    0.57
   6  12   1    5.30    0.63
  -6  12  -1    4.88    0.57
  -6  12  -1    5.16    0.66
  -7 -12  -1    0.12    0.28
   7 -12   1    0.70    0.30
  -7 -12  -1    0.52    0.26
   7 -12   1    0.42    0.30
  -7 -12  -1    0.16    0.24
  -7  12  -1    0.62    0.38
   7  12   1    0.33    0.40
  -7  12  -1    0.46    0.34
   7  12   1    0.83    0.33
  -8 -12  -1   -0.15    0.27
  -8 -12  -1   -0.12    0.33
   8 -12   1    0.56    0.34
   8 -12   1   -0.05    0.37
   8 -12   1    0.29    0.36
  -8 -12  -1    0.22    0.25
  -8  12  -1    0.85    0.38
  -8  12  -1    0.79    0.47
   8  12   1   -0.50    0.29
   8  12   1    0.46    0.39
  -9 -12  -1    0.42    0.40
   9 -12   1   -0.48    0.30
  -9 -12  -1    0.62    0.33
   9 -12   1   -0.35    0.32
   9 -12   1    0.18    0.42
  -9 -12  -1   -0.02    0.31
  -9  12  -1   -0.05    0.31
   9  12   1    0.13    0.38
  -9  12  -1    0.00    0.41
  -9  12  -1    0.76    0.45
   9  12   1   -0.49    0.42
  10 -12   1   -0.07    0.46
 -10 -12  -1   -0.58    0.30
 -10 -12  -1   -0.30    0.31
  10 -12   1   -0.67    0.42
  10 -12   1    0.01    0.42
 -10  12  -1    0.24    0.46
 -10  12  -1    0.58    0.49
  10  12   1    0.12    0.47
  10  12   1    0.03    0.43
 -10  12  -1    0.12    0.40
  -9 -13   1    0.36    0.32
  -9 -13   1    0.70    0.32
  -9 -13   1    0.22    0.42
   9 -13  -1    0.44    0.49
   9 -13  -1   -0.17    0.35
  -9  13   1    0.57    0.53
   9  13  -1    0.50    0.47
   9  13  -1    0.65    0.44
  -9  13   1    1.16    0.45
   8 -13  -1    1.00    0.39
  -8 -13   1    1.72    0.39
   8 -13  -1    1.85    0.55
  -8 -13   1    1.38    0.42
  -8 -13   1    1.69    0.43
  -8  13   1    0.78    0.44
   8  13  -1    0.85    0.40
   8  13  -1    1.68    0.53
  -8  13   1    1.11    0.40
  -7 -13   1    0.22    0.31
  -7 -13   1    0.56    0.26
   7 -13  -1    0.22    0.28
   7 -13  -1   -0.34    0.24
  -7 -13   1   -0.38    0.18
   7  13  -1   -0.31    0.30
  -7  13   1    0.44    0.33
  -7  13   1    0.09    0.32
   7  13  -1   -0.02    0.33
  -6 -13   1    4.13    0.50
   6 -13  -1    3.10    0.34
   6 -13  -1    3.59    0.58
  -6 -13   1    2.99    0.43
   6 -13  -1    2.94    0.42
  -6 -13   1    4.19    0.52
   6  13  -1    3.81    0.55
   6  13  -1    2.69    0.56
  -6  13   1    3.46    0.49
  -6  13   1    3.40    0.55
   5 -13  -1   10.80    0.54
  -5 -13   1   10.92    0.68
   5 -13  -1   10.51    0.74
  -5 -13   1   11.06    0.63
   5 -13  -1   11.90    0.66
  -5 -13   1   11.84    0.71
  -5  13   1   10.11    0.64
   5  13  -1    9.96    0.73
   5  13  -1   11.33    0.83
  -5  13   1   10.25    0.76
   4 -13  -1   13.69    0.68
  -4 -13   1   13.27    0.65
  -4 -13   1   12.80    0.72
   4 -13  -1   13.86    0.62
   4  13  -1   12.18    0.75
  -4  13   1   13.61    0.83
   4  13  -1   14.80    0.91
  -4  13   1   13.50    0.66
   4  13  -1   12.86    0.66
  -3 -13   1    0.68    0.24
  -3 -13   1    0.57    0.25
   3 -13  -1    0.27    0.18
  -3 -13   1    0.18    0.16
   3 -13  -1    0.21    0.17
  -3 -13   1    0.89    0.25
   3 -13  -1    0.25    0.24
   3  13  -1    1.04    0.32
  -3  13   1    0.17    0.17
   3  13  -1    0.34    0.24
  -3  13   1    0.49    0.27
  -2 -13   1    4.82    0.50
  -2 -13   1    4.80    0.47
  -2 -13   1    4.44    0.33
   2 -13  -1    4.75    0.39
  -2 -13   1    5.37    0.48
   2 -13  -1    4.78    0.51
   2 -13  -1    4.09    0.39
   2  13  -1    3.09    0.48
  -2  13   1    4.62    0.53
  -2  13   1    4.18    0.54
   2  13  -1    5.52    0.51
  -2  13   1    4.10    0.31
  -1 -13   1    6.85    0.37
  -1 -13   1    6.95    0.49
  -1 -13   1    6.73    0.47
   1 -13  -1    7.41    0.45
   1 -13  -1    7.11    0.52
  -1 -13   1    7.24    0.53
   1 -13  -1    6.28    0.44
   1 -13  -1    6.63    0.33
  -1  13   1    6.31    0.64
  -1  13   1    6.31    0.51
   1  13  -1    6.92    0.58
   1  13  -1    6.58    0.59
  -1  13   1    6.59    0.31
   0 -13   1    2.68    0.34
   0 -13  -1    3.05    0.26
   0 -13   1    2.75    0.24
   0 -13   1    3.17    0.42
   0 -13  -1    1.76    0.33
   0 -13  -1    2.52    0.33
   0 -13  -1    2.29    0.29
   0 -13   1    2.50    0.34
   0  13  -1    2.48    0.42
   0  13  -1    2.65    0.41
   0  13   1    2.65    0.37
   0  13   1    2.66    0.43
  -1 -13  -1    7.79    0.54
   1 -13   1    8.52    0.51
  -1 -13  -1    7.84    0.48
  -1 -13  -1    8.47    0.52
   1 -13   1    7.62    0.51
   1 -13   1    7.67    0.31
  -1 -13  -1    8.39    0.41
   1 -13   1    8.23    0.56
   1  13   1    8.09    0.61
  -1  13  -1    7.88    0.35
  -1  13  -1    7.49    0.59
   1  13   1    7.45    0.51
  -1  13  -1    8.12    0.33
  -1  13  -1    8.27    0.60
  -2 -13  -1    5.35    0.43
   2 -13   1    5.78    0.50
   2 -13   1    4.90    0.39
  -2 -13  -1    5.36    0.37
  -2 -13  -1    6.31    0.52
   2 -13   1    5.02    0.52
   2  13   1    5.47    0.44
  -2  13  -1    5.26    0.57
   2  13   1    5.40    0.61
  -2  13  -1    5.05    0.34
  -2  13  -1    5.07    0.57
  -2  13  -1    4.97    0.31
   3 -13   1    0.64    0.25
  -3 -13  -1    0.96    0.21
  -3 -13  -1    0.87    0.25
   3 -13   1    1.06    0.24
  -3 -13  -1    0.91    0.26
  -3 -13  -1    0.45    0.26
   3 -13   1    1.44    0.34
  -3  13  -1    1.02    0.20
  -3  13  -1    0.85    0.32
  -3  13  -1    0.82    0.29
   3  13   1    0.97    0.31
  -3  13  -1    0.77    0.23
   3  13   1    0.74    0.23
   3  13   1    1.05    0.37
   4 -13   1    3.36    0.41
   4 -13   1    3.94    0.41
  -4 -13  -1    3.98    0.46
  -4 -13  -1    3.77    0.41
   4 -13   1    4.27    0.54
  -4 -13  -1    3.25    0.38
   4  13   1    3.63    0.56
  -4  13  -1    3.06    0.49
  -4  13  -1    3.27    0.40
   4  13   1    3.00    0.50
  -5 -13  -1   10.79    0.67
   5 -13   1   11.46    0.70
  -5 -13  -1   11.11    0.64
   5 -13   1   10.35    0.57
  -5 -13  -1   10.47    0.66
   5 -13   1   11.30    0.77
   5  13   1    8.40    0.69
   5  13   1   11.56    0.83
  -5  13  -1   11.25    0.67
  -5  13  -1   11.05    0.82
  -6 -13  -1   10.18    0.65
   6 -13   1   10.12    0.80
  -6 -13  -1   10.67    0.71
   6 -13   1    9.59    0.55
   6 -13   1    9.46    0.70
  -6 -13  -1    9.90    0.70
  -6  13  -1    9.95    0.80
  -6  13  -1   10.67    0.72
   6  13   1   10.01    0.76
   6  13   1   10.02    0.96
   7 -13   1    3.24    0.57
  -7 -13  -1    3.82    0.50
  -7 -13  -1    3.69    0.56
   7 -13   1    4.30    0.56
  -7 -13  -1    3.59    0.52
   7  13   1    3.68    0.62
  -7  13  -1    2.88    0.51
  -7  13  -1    3.21    0.60
   7  13   1    4.69    0.68
   8 -13   1   -0.01    0.32
   8 -13   1    0.14    0.38
  -8 -13  -1    0.11    0.33
  -8 -13  -1   -0.14    0.23
  -8 -13  -1    0.01    0.31
  -8  13  -1    0.55    0.48
   8  13   1   -0.49    0.32
   8  13   1    0.42    0.36
  -8  13  -1    0.49    0.37
  -8  13  -1   -0.04    0.24
  -9 -13  -1    4.87    0.62
  -9 -13  -1    6.22    0.75
   9 -13   1    5.32    0.78
  -9 -13  -1    3.68    0.57
   9 -13   1    6.91    0.77
  -9  13  -1    4.28    0.76
   9  13   1    5.61    0.79
   9  13   1    5.05    0.83
  -9  13  -1    5.47    0.69
  -9  13  -1    5.47    0.80
   9 -14  -1    0.04    0.42
  -9 -14   1   -0.46    0.39
   9 -14  -1   -0.22    0.36
  -9 -14   1   -0.12    0.33
  -9 -14   1    0.19    0.34
  -9  14   1    0.23    0.43
   9  14  -1    0.38    0.48
   9  14  -1   -0.30    0.37
  -9  14   1   -0.35    0.45
  -8 -14   1   -0.48    0.25
   8 -14  -1    0.48    0.46
  -8 -14   1    0.05    0.34
   8 -14  -1   -0.55    0.28
  -8 -14   1   -0.22    0.26
   8  14  -1    0.31    0.34
   8  14  -1   -0.16    0.41
  -8  14   1    0.31    0.38
  -8  14   1    0.02    0.43
  -7 -14   1    1.07    0.31
  -7 -14   1    0.67    0.35
  -7 -14   1    1.33    0.36
   7 -14  -1    1.12    0.44
   7 -14  -1    0.69    0.35
   7  14  -1    0.43    0.39
   7  14  -1    0.40    0.35
  -7  14   1    1.20    0.44
  -7  14   1    1.21    0.39
   6 -14  -1   -0.43    0.21
  -6 -14   1   -0.17    0.25
  -6 -14   1   -0.16    0.24
   6 -14  -1    0.02    0.28
  -6 -14   1   -0.24    0.19
  -6  14   1    0.12    0.34
  -6  14   1   -0.24    0.24
   6  14  -1    0.02    0.31
   6  14  -1    0.02    0.24
   5 -14  -1    7.23    0.48
  -5 -14   1    7.39    0.54
   5 -14  -1    8.54    0.61
  -5 -14   1    7.77    0.58
  -5 -14   1    7.82    0.64
   5  14  -1    6.99    0.82
   5  14  -1    7.49    0.76
  -5  14   1    5.98    0.70
  -5  14   1    7.27    0.56
   4 -14  -1    1.39    0.27
   4 -14  -1    2.15    0.43
  -4 -14   1    2.26    0.39
   4 -14  -1    1.51    0.30
  -4 -14   1    1.66    0.29
  -4  14   1    1.63    0.41
   4  14  -1    1.42    0.37
   4  14  -1    1.93    0.47
   4  14  -1    2.10    0.36
  -4  14   1    2.14    0.33
  -3 -14   1    1.30    0.34
  -3 -14   1    1.68    0.27
  -3 -14   1    1.66    0.33
   3 -14  -1    1.59    0.29
   3 -14  -1    1.59    0.30
   3 -14  -1    1.67    0.36
  -3 -14   1    1.89    0.33
   3  14  -1    1.40    0.34
  -3  14   1    1.86    0.39
  -3  14   1    1.98    0.29
   3  14  -1    1.66    0.40
  -2 -14   1    1.14    0.30
  -2 -14   1    1.44    0.31
  -2 -14   1    1.25    0.23
   2 -14  -1    0.83    0.30
   2 -14  -1    1.36    0.27
  -2 -14   1    1.46    0.34
   2 -14  -1    1.26    0.24
   2  14  -1    1.11    0.33
  -2  14   1    0.68    0.31
  -2  14   1    0.70    0.28
   2  14  -1    1.32    0.37
  -1 -14   1    0.37    0.22
  -1 -14   1    0.08    0.13
   1 -14  -1    0.22    0.18
   1 -14  -1    0.36    0.24
  -1 -14   1    0.58    0.23
   1 -14  -1    0.08    0.18
  -1 -14   1    0.56    0.24
  -1  14   1    0.15    0.24
   1  14  -1   -0.27    0.21
   1  14  -1    0.46    0.25
  -1  14   1    0.28    0.22
   0 -14   1    0.15    0.11
   0 -14  -1   -0.20    0.20
   0 -14   1    0.00    0.18
   0 -14   1    0.17    0.20
   0 -14   1    0.25    0.23
   0 -14  -1   -0.07    0.14
   0 -14  -1    0.11    0.11
   0 -14  -1    0.10    0.17
   0  14  -1    0.04    0.22
   0  14   1    0.68    0.27
   0  14   1    0.07    0.19
   0  14  -1   -0.09    0.20
   1 -14   1    6.54    0.48
  -1 -14  -1    6.84    0.50
   1 -14   1    6.18    0.60
  -1 -14  -1    7.14    0.49
  -1 -14  -1    6.66    0.40
  -1 -14  -1    8.14    0.61
   1 -14   1    6.74    0.51
   1  14   1    6.63    0.52
  -1  14  -1    6.86    0.68
  -1  14  -1    7.20    0.67
   1  14   1    7.08    0.70
  -2 -14  -1    1.88    0.28
   2 -14   1    2.15    0.32
  -2 -14  -1    2.23    0.33
  -2 -14  -1    1.71    0.33
   2 -14   1    3.08    0.39
  -2 -14  -1    3.07    0.44
   2 -14   1    2.48    0.40
  -2  14  -1    2.28    0.42
  -2  14  -1    2.09    0.42
   2  14   1    2.87    0.38
   2  14   1    3.67    0.52
   3 -14   1   -0.15    0.18
  -3 -14  -1    0.10    0.16
  -3 -14  -1   -0.01    0.19
   3 -14   1   -0.07    0.20
  -3 -14  -1    0.11    0.22
  -3 -14  -1    0.18    0.20
   3 -14   1    0.29    0.20
  -3  14  -1    0.01    0.24
  -3  14  -1   -0.34    0.20
  -3  14  -1   -0.26    0.17
   3  14   1    0.13    0.22
   3  14   1    0.50    0.32
  -3  14  -1   -0.03    0.15
   4 -14   1    2.47    0.42
   4 -14   1    2.89    0.37
  -4 -14  -1    2.57    0.36
  -4 -14  -1    3.46    0.44
  -4 -14  -1    2.83    0.41
  -4  14  -1    2.33    0.38
  -4  14  -1    2.71    0.49
  -4  14  -1    2.90    0.36
   4  14   1    3.28    0.58
   4  14   1    2.44    0.45
  -5 -14  -1    6.16    0.50
  -5 -14  -1    6.29    0.60
   5 -14   1    6.30    0.61
   5 -14   1    5.24    0.43
   5 -14   1    5.97    0.66
  -5 -14  -1    5.38    0.58
  -5  14  -1    6.14    0.59
  -5  14  -1    4.84    0.63
  -5  14  -1    4.88    0.48
   5  14   1    4.57    0.66
   5  14   1    4.54    0.62
  -6 -14  -1   -0.18    0.20
   6 -14   1    0.00    0.27
  -6 -14  -1    0.12    0.27
  -6 -14  -1    0.23    0.25
   6 -14   1    0.40    0.34
   6 -14   1   -0.31    0.17
  -6  14  -1   -0.14    0.20
  -6  14  -1    0.71    0.35
   6  14   1   -0.38    0.28
  -6  14  -1   -0.19    0.26
   6  14   1    0.43    0.30
  -7 -14  -1   -0.16    0.34
   7 -14   1    0.50    0.37
   7 -14   1    0.04    0.29
  -7 -14  -1    0.14    0.28
  -7 -14  -1   -0.05    0.32
   7  14   1   -0.10    0.33
  -7  14  -1   -0.10    0.35
  -7  14  -1    0.37    0.29
   7  14   1   -0.07    0.41
  -7  14  -1    0.26    0.34
   8 -14   1    4.81    0.68
  -8 -14  -1    3.74    0.54
  -8 -14  -1    4.90    0.68
   8 -14   1    4.27    0.72
  -8 -14  -1    5.44    0.63
   8  14   1    4.09    0.68
   8  14   1    4.01    0.75
  -8  14  -1    5.05    0.69
  -8  14  -1    4.51    0.58
  -8  14  -1    4.58    0.76
  -9 -14  -1    2.08    0.52
  -9 -14  -1    2.74    0.53
  -9 -14  -1    1.76    0.49
   9 -14   1    1.12    0.61
   9 -14   1    1.45    0.49
   9  14   1    2.37    0.70
  -9  14  -1    2.00    0.63
  -9  14  -1    1.90    0.61
  -9  14  -1    2.01    0.50
   9  14   1    2.04    0.57
  -9 -15   1    8.15    0.89
   9 -15  -1    8.64    1.06
  -9  15   1    7.22    1.01
   9  15  -1    6.98    0.87
   9  15  -1    7.44    1.03
  -9  15   1    6.69    0.86
  -8 -15   1    0.37    0.33
  -8 -15   1    0.74    0.38
  -8 -15   1    0.16    0.43
   8 -15  -1    0.42    0.39
   8 -15  -1    0.75    0.39
  -8  15   1    0.65    0.42
   8  15  -1    0.20    0.40
  -8  15   1    0.35    0.45
   8  15  -1    0.21    0.45
  -7 -15   1    2.49    0.44
   7 -15  -1    3.82    0.56
  -7 -15   1    4.54    0.58
  -7 -15   1    3.31    0.54
   7 -15  -1    3.45    0.62
  -7  15   1    3.92    0.66
   7  15  -1    3.69    0.59
   7  15  -1    3.30    0.65
  -7  15   1    5.07    0.62
   6 -15  -1    0.04    0.26
  -6 -15   1    0.00    0.25
  -6 -15   1   -0.35    0.27
   6 -15  -1   -0.27    0.22
  -6 -15   1    0.13    0.27
   6  15  -1   -0.16    0.35
  -6  15   1   -0.05    0.26
   6  15  -1    0.13    0.32
  -6  15   1    0.11    0.35
  -5 -15   1    0.64    0.30
   5 -15  -1   -0.12    0.24
  -5 -15   1    0.36    0.25
  -5 -15   1    0.70    0.31
   5 -15  -1    0.81    0.36
   5 -15  -1    0.45    0.22
  -5  15   1    0.19    0.29
   5  15  -1    0.49    0.41
  -5  15   1    0.68    0.29
   5  15  -1   -0.10    0.30
  -4 -15   1    1.55    0.31
  -4 -15   1    1.53    0.40
   4 -15  -1    1.46    0.38
   4 -15  -1    1.85    0.34
   4 -15  -1    1.97    0.32
  -4  15   1    2.28    0.34
  -4  15   1    1.68    0.43
   4  15  -1    2.14    0.40
   4  15  -1    1.95    0.43
   4  15  -1    1.28    0.45
  -3 -15   1    0.14    0.23
  -3 -15   1    0.04    0.22
   3 -15  -1    0.34    0.24
  -3 -15   1    0.28    0.24
   3 -15  -1    0.26    0.25
  -3 -15   1   -0.13    0.17
   3 -15  -1    0.46    0.21
  -3  15   1    0.11    0.28
   3  15  -1    0.15    0.29
   3  15  -1    0.67    0.31
  -3  15   1    0.70    0.32
   2 -15  -1    3.44    0.40
   2 -15  -1    2.43    0.35
  -2 -15   1    2.45    0.39
  -2 -15   1    3.33    0.48
   2 -15  -1    3.02    0.47
  -2 -15   1    3.60    0.44
  -2 -15   1    2.90    0.32
   2  15  -1    2.44    0.47
  -2  15   1    2.80    0.47
  -2  15   1    3.73    0.57
   2  15  -1    2.53    0.41
   1 -15  -1    1.87    0.40
  -1 -15   1    2.21    0.39
  -1 -15   1    3.05    0.40
   1 -15  -1    2.55    0.38
   1 -15  -1    2.51    0.34
  -1 -15   1    2.33    0.39
  -1 -15   1    2.60    0.29
  -1  15   1    3.15    0.48
  -1  15   1    1.85    0.44
   1  15  -1    2.57    0.43
   1  15  -1    1.95    0.43
   0 -15   1    2.18    0.24
   0 -15   1    2.76    0.38
   0 -15  -1    2.19    0.25
   0 -15  -1    2.29    0.37
   0 -15   1    2.06    0.34
   0 -15   1    2.63    0.41
   0 -15  -1    2.33    0.34
   0 -15  -1    2.44    0.41
   0  15   1    1.96    0.37
   0  15  -1    2.79    0.47
   0  15   1    2.47    0.45
   0  15  -1    3.42    0.49
  -1 -15  -1    0.20    0.12
   1 -15   1    0.27    0.22
   1 -15   1    0.36    0.23
   1 -15   1   -0.01    0.17
  -1 -15  -1    0.27    0.20
  -1 -15  -1   -0.11    0.21
  -1 -15  -1    0.09    0.21
  -1  15  -1    0.22    0.28
   1  15   1    0.03    0.24
  -1  15  -1    0.22    0.27
   1  15   1   -0.02    0.24
   2 -15   1    5.95    0.54
  -2 -15  -1    4.90    0.38
  -2 -15  -1    6.08    0.50
   2 -15   1    4.61    0.55
  -2 -15  -1    4.53    0.55
   2 -15   1    4.77    0.49
  -2 -15  -1    4.71    0.51
  -2  15  -1    5.64    0.65
   2  15   1    4.79    0.51
   2  15   1    4.39    0.63
  -2  15  -1    4.50    0.60
   3 -15   1    2.39    0.38
  -3 -15  -1    1.85    0.35
  -3 -15  -1    2.08    0.33
   3 -15   1    1.98    0.34
  -3 -15  -1    1.63    0.37
   3 -15   1    1.87    0.40
  -3 -15  -1    1.64    0.35
   3  15   1    1.56    0.34
  -3  15  -1    1.81    0.42
   3  15   1    2.69    0.52
  -3  15  -1    1.69    0.42
   4 -15   1    0.03    0.20
  -4 -15  -1   -0.03    0.25
   4 -15   1    0.48    0.30
   4 -15   1   -0.09    0.23
  -4 -15  -1    0.49    0.26
  -4 -15  -1    0.02    0.18
   4  15   1   -0.38    0.29
  -4  15  -1    0.24    0.21
   4  15   1    0.07    0.29
  -4  15  -1   -0.04    0.25
  -4  15  -1    0.13    0.30
  -4  15  -1   -0.10    0.23
  -5 -15  -1    1.39    0.36
  -5 -15  -1    1.99    0.41
   5 -15   1    0.74    0.34
   5 -15   1    1.07    0.28
   5 -15   1    0.89    0.33
  -5 -15  -1    1.63    0.37
   5  15   1    1.18    0.45
   5  15   1    0.67    0.35
  -5  15  -1    3.26    0.58
  -5  15  -1    1.31    0.29
  -5  15  -1    1.62    0.37
   6 -15   1    7.61    0.83
   6 -15   1    7.20    0.71
  -6 -15  -1    5.49    0.60
  -6 -15  -1    7.21    0.70
  -6 -15  -1    7.61    0.73
   6 -15   1    7.34    0.54
   6  15   1    7.85    0.83
   6  15   1    6.86    0.82
  -6  15  -1    7.58    0.73
  -6  15  -1    6.81    0.61
  -6  15  -1    7.47    0.87
   7 -15   1   -0.33    0.30
  -7 -15  -1    0.23    0.36
  -7 -15  -1    0.47    0.30
  -7 -15  -1   -0.63    0.30
   7 -15   1   -0.52    0.27
  -7  15  -1   -0.02    0.28
   7  15   1   -0.04    0.30
   7  15   1   -0.35    0.39
  -7  15  -1   -0.54    0.34
  -7  15  -1   -0.02    0.40
   8 -15   1    5.81    0.70
  -8 -15  -1    5.58    0.72
   8 -15   1    4.57    0.71
  -8 -15  -1    4.91    0.65
  -8 -15  -1    6.08    0.69
   8  15   1    5.19    0.77
  -8  15  -1    5.75    0.65
  -8  15  -1    6.65    0.85
   8  15   1    5.64    0.84
  -8  15  -1    5.45    0.87
  -8 -16   1    1.00    0.38
   8 -16  -1    1.63    0.53
  -8 -16   1    0.45    0.47
   8 -16  -1    1.00    0.44
  -8 -16   1    1.56    0.43
   8  16  -1    0.89    0.44
   8  16  -1    1.50    0.60
  -8  16   1    1.43    0.57
  -8  16   1    1.77    0.52
  -7 -16   1    1.54    0.39
  -7 -16   1    0.64    0.34
  -7 -16   1    1.77    0.43
   7 -16  -1    0.32    0.33
  -7  16   1    0.55    0.43
   7  16  -1    0.52    0.40
   7  16  -1    0.33    0.46
  -7  16   1   -0.17    0.36
  -6 -16   1    1.46    0.45
  -6 -16   1    1.98    0.41
  -6 -16   1    1.30    0.42
   6 -16  -1    1.33    0.37
   6 -16  -1    1.46    0.47
  -6  16   1    0.81    0.41
   6  16  -1    0.95    0.42
   6  16  -1    1.51    0.55
  -6  16   1    1.71    0.54
   5 -16  -1    1.56    0.35
  -5 -16   1    1.10    0.31
   5 -16  -1    1.66    0.47
  -5 -16   1    1.30    0.37
  -5 -16   1    1.13    0.37
   5 -16  -1    0.83    0.26
   5  16  -1    1.50    0.48
  -5  16   1    1.12    0.44
   5  16  -1    1.06    0.44
  -4 -16   1    1.32    0.32
   4 -16  -1    1.10    0.36
   4 -16  -1    0.86    0.31
   4 -16  -1    0.64    0.26
  -4 -16   1    0.75    0.30
  -4  16   1    1.37    0.46
   4  16  -1    0.84    0.41
  -4  16   1    1.01    0.39
   4  16  -1    1.27    0.40
   3 -16  -1    0.06    0.27
  -3 -16   1    0.07    0.22
  -3 -16   1   -0.28    0.23
  -3 -16   1    0.05    0.17
  -3 -16   1   -0.01    0.22
   3 -16  -1   -0.12    0.21
   3 -16  -1   -0.13    0.20
   3  16  -1    0.05    0.27
   3  16  -1    0.42    0.31
  -3  16   1    0.10    0.26
  -3  16   1   -0.05    0.30
   2 -16  -1    1.09    0.28
  -2 -16   1    0.98    0.24
   2 -16  -1    1.89    0.40
  -2 -16   1    1.24    0.36
   2 -16  -1    1.32    0.30
  -2 -16   1    1.51    0.35
  -2 -16   1    1.30    0.32
  -2  16   1    0.90    0.37
  -2  16   1    0.88    0.37
   2  16  -1    1.10    0.39
   2  16  -1    1.33    0.37
  -1 -16   1    8.24    0.65
   1 -16  -1    6.68    0.67
  -1 -16   1    7.78    0.43
  -1 -16   1    7.11    0.63
   1 -16  -1    8.12    0.56
   1 -16  -1    7.54    0.54
  -1 -16   1    6.91    0.58
   1  16  -1    6.49    0.65
   1  16  -1    7.66    0.81
  -1  16   1    6.28    0.69
  -1  16   1    5.96    0.70
   0 -16   1    5.13    0.53
   0 -16  -1    4.85    0.48
   0 -16   1    5.19    0.53
   0 -16  -1    5.35    0.62
   0 -16   1    6.16    0.64
   0 -16  -1    5.18    0.52
   0  16  -1    6.42    0.73
   0  16   1    5.97    0.62
   0  16   1    5.87    0.71
   0  16  -1    6.16    0.68
   1 -16   1    0.63    0.25
  -1 -16  -1    0.71    0.19
  -1 -16  -1    1.18    0.35
  -1 -16  -1    0.35    0.24
   1 -16   1    1.03    0.30
   1 -16   1    0.99    0.31
   1  16   1    1.04    0.42
   1  16   1    1.01    0.34
  -1  16  -1    0.43    0.32
  -1  16  -1    0.35    0.31
  -2 -16  -1    0.40    0.24
   2 -16   1   -0.01    0.21
  -2 -16  -1   -0.06    0.22
  -2 -16  -1    0.27    0.19
  -2 -16  -1    0.01    0.24
   2 -16   1    0.44    0.31
   2 -16   1    0.08    0.24
   2  16   1   -0.31    0.26
  -2  16  -1    0.07    0.31
  -2  16  -1    0.38    0.32
   2  16   1    0.04    0.27
  -3 -16  -1    4.56    0.57
   3 -16   1    5.43    0.54
   3 -16   1    6.30    0.69
  -3 -16  -1    4.57    0.51
  -3 -16  -1    4.66    0.54
   3 -16   1    3.90    0.49
  -3 -16  -1    4.30    0.45
  -3  16  -1    5.24    0.68
  -3  16  -1    5.42    0.69
   3  16   1    4.52    0.69
  -4 -16  -1    0.91    0.28
   4 -16   1    0.84    0.27
   4 -16   1    0.64    0.31
  -4 -16  -1    1.25    0.36
   4 -16   1    0.90    0.36
  -4 -16  -1    1.00    0.31
   4  16   1    0.76    0.36
   4  16   1    0.05    0.32
  -4  16  -1    0.19    0.34
  -4  16  -1    1.00    0.40
  -5 -16  -1    0.26    0.28
  -5 -16  -1    0.10    0.26
  -5 -16  -1    0.44    0.27
   5 -16   1    0.45    0.31
   5 -16   1   -0.03    0.21
   5 -16   1    0.10    0.31
  -5  16  -1    0.06    0.35
   5  16   1    0.11    0.34
   5  16   1    0.05    0.39
  -5  16  -1   -0.30    0.30
   6 -16   1    0.83    0.39
  -6 -16  -1    1.56    0.42
   6 -16   1    0.74    0.27
   6 -16   1    1.05    0.40
  -6 -16  -1    1.22    0.39
  -6 -16  -1    1.13    0.33
   6  16   1    0.98    0.41
  -6  16  -1    0.46    0.38
  -6  16  -1    0.55    0.43
  -6  16  -1    0.92    0.31
   6  16   1    1.20    0.43
  -7 -16  -1    0.60    0.38
  -7 -16  -1   -0.17    0.34
  -7 -16  -1    0.02    0.27
   7 -16   1    0.39    0.36
   7 -16   1    0.85    0.47
  -7  16  -1    0.72    0.35
   7  16   1   -0.13    0.38
   7  16   1    0.31    0.38
  -7  16  -1   -0.15    0.37
  -7  16  -1   -0.01    0.38
  -8 -16  -1    0.13    0.39
   8 -16   1    0.17    0.41
  -8 -16  -1    0.27    0.38
   8 -16   1    0.49    0.50
  -8 -16  -1    0.03    0.27
  -8  16  -1    0.71    0.37
   8  16   1   -0.14    0.45
  -8  16  -1    0.69    0.55
  -8  16  -1    0.51    0.47
   8  16   1   -0.10    0.47
  -7 -17   1    1.71    0.46
  -7 -17   1    2.50    0.53
  -7 -17   1    1.70    0.40
   7 -17  -1    2.29    0.53
   7 -17  -1    0.94    0.41
   7  17  -1    1.35    0.49
  -7  17   1    1.40    0.56
   7  17  -1    0.20    0.45
   6 -17  -1    0.50    0.35
   6 -17  -1    0.41    0.36
  -6 -17   1    1.12    0.43
  -6 -17   1    0.42    0.26
  -6 -17   1   -0.19    0.37
  -6  17   1    0.85    0.47
   6  17  -1    0.35    0.41
   6  17  -1    0.15    0.36
  -5 -17   1   -0.19    0.26
  -5 -17   1   -0.40    0.27
   5 -17  -1   -0.08    0.20
  -5 -17   1    0.13    0.23
   5 -17  -1    0.18    0.32
   5 -17  -1   -0.01    0.29
  -5  17   1    0.40    0.41
   5  17  -1   -0.68    0.32
   5  17  -1    0.36    0.35
   4 -17  -1   -0.14    0.21
  -4 -17   1    0.06    0.29
   4 -17  -1   -0.16    0.28
  -4 -17   1    0.08    0.21
   4 -17  -1   -0.06    0.24
  -4  17   1   -0.27    0.31
   4  17  -1   -0.05    0.31
  -4  17   1    0.02    0.32
   4  17  -1    0.33    0.38
  -3 -17   1    1.74    0.38
  -3 -17   1    1.98    0.45
  -3 -17   1    2.37    0.35
   3 -17  -1    1.22    0.41
   3 -17  -1    2.28    0.41
   3 -17  -1    2.35    0.38
   3  17  -1    2.79    0.55
  -3  17   1    1.19    0.41
  -3  17   1    1.88    0.49
   3  17  -1    2.67    0.48
  -2 -17   1    6.26    0.43
  -2 -17   1    6.40    0.63
  -2 -17   1    5.83    0.66
  -2 -17   1    5.16    0.58
   2 -17  -1    6.37    0.57
   2 -17  -1    6.62    0.72
   2 -17  -1    6.25    0.59
  -2  17   1    5.29    0.67
   2  17  -1    6.52    0.78
   2  17  -1    7.04    0.73
  -2  17   1    6.06    0.76
   1 -17  -1    0.15    0.22
  -1 -17   1    0.17    0.27
  -1 -17   1    0.60    0.28
   1 -17  -1    0.25    0.24
  -1 -17   1    0.42    0.28
   1 -17  -1    0.38    0.31
   1  17  -1    0.21    0.33
  -1  17   1    0.30    0.32
  -1  17   1    0.35    0.33
   1  17  -1    0.47    0.31
   0 -17   1    4.12    0.51
   0 -17  -1    5.17    0.56
   0 -17  -1    5.63    0.55
   0 -17   1    5.44    0.56
   0 -17   1    5.35    0.61
   0 -17  -1    6.08    0.66
   0  17  -1    6.71    0.75
   0  17  -1    5.39    0.70
   0  17   1    5.06    0.63
   0  17   1    5.13    0.69
   1 -17   1   -0.10    0.21
   1 -17   1   -0.36    0.22
  -1 -17  -1    0.19    0.17
  -1 -17  -1   -0.10    0.29
  -1 -17  -1   -0.09    0.21
   1 -17   1   -0.31    0.22
  -1  17  -1    0.22    0.30
  -1  17  -1    0.29    0.31
   1  17   1   -0.25    0.27
   1  17   1   -0.25    0.26
  -2 -17  -1    0.62    0.27
  -2 -17  -1    0.42    0.30
  -2 -17  -1    0.06    0.27
   2 -17   1    0.74    0.28
   2 -17   1    0.57    0.28
   2 -17   1    0.02    0.28
  -2 -17  -1    0.67    0.21
   2  17   1    0.62    0.31
  -2  17  -1   -0.04    0.29
   2  17   1    0.23    0.39
  -2  17  -1   -0.06    0.29
  -3 -17  -1    0.22    0.26
   3 -17   1   -0.02    0.19
  -3 -17  -1    0.07    0.21
  -3 -17  -1    0.33    0.27
   3 -17   1    0.24    0.26
  -3 -17  -1    0.17    0.31
   3 -17   1    0.16    0.31
   3  17   1   -0.86    0.29
  -3  17  -1    0.30    0.31
  -3  17  -1   -0.08    0.32
   3  17   1   -0.32    0.25
   4 -17   1    0.24    0.29
  -4 -17  -1   -0.04    0.26
  -4 -17  -1   -0.04    0.25
   4 -17   1   -0.03    0.19
   4 -17   1   -0.26    0.27
  -4 -17  -1   -0.08    0.22
   4  17   1    0.54    0.47
  -4  17  -1    0.03    0.30
   4  17   1    0.39    0.32
  -4  17  -1    0.40    0.36
  -5 -17  -1    1.36    0.35
   5 -17   1    1.18    0.38
  -5 -17  -1    1.45    0.43
   5 -17   1    1.36    0.46
  -5 -17  -1    1.86    0.42
   5 -17   1    1.55    0.35
  -5  17  -1    1.20    0.48
  -5  17  -1    0.80    0.48
   5  17   1    1.96    0.58
   5  17   1    1.06    0.46
   6 -17   1    5.06    0.77
   6 -17   1    4.50    0.63
  -6 -17  -1    5.30    0.64
  -6 -17  -1    4.71    0.57
  -6 -17  -1    6.33    0.74
   6  17   1    4.96    0.74
  -6  17  -1    4.52    0.71
  -6  17  -1    4.71    0.76
   6  17   1    5.38    0.79
   7 -17   1    4.56    0.68
  -7 -17  -1    5.47    0.65
  -7 -17  -1    5.75    0.73
  -7 -17  -1    4.34    0.68
  -7  17  -1    3.72    0.73
   7  17   1    6.32    0.85
   7  17   1    4.83    0.83
   7 -18  -1    0.80    0.48
  -7 -18   1    2.17    0.46
  -7 -18   1    0.74    0.36
  -7 -18   1    1.71    0.49
   7 -18  -1    1.03    0.45
   7  18  -1    0.54    0.46
  -7  18   1    1.54    0.60
   7  18  -1    0.76    0.54
  -6 -18   1    3.35    0.61
   6 -18  -1    2.29    0.50
  -6 -18   1    2.82    0.48
   6 -18  -1    3.49    0.57
  -6 -18   1    3.39    0.59
   6  18  -1    3.62    0.73
   6  18  -1    2.95    0.57
  -6  18   1    3.26    0.68
  -5 -18   1    1.90    0.42
   5 -18  -1    0.91    0.43
   5 -18  -1    1.12    0.39
  -5 -18   1    1.98    0.46
  -5 -18   1    1.41    0.36
   5 -18  -1    1.08    0.31
   5  18  -1    0.79    0.50
   5  18  -1    1.09    0.46
  -5  18   1    1.05    0.49
  -5  18   1    2.24    0.60
  -4 -18   1    0.46    0.26
   4 -18  -1    0.98    0.30
   4 -18  -1    1.06    0.42
   4 -18  -1    1.25    0.35
  -4 -18   1    0.50    0.37
  -4  18   1    1.44    0.50
  -4  18   1    0.60    0.39
   4  18  -1    0.88    0.40
   4  18  -1    0.39    0.43
   3 -18  -1   -0.04    0.24
  -3 -18   1    0.11    0.28
   3 -18  -1   -0.20    0.30
   3 -18  -1    0.03    0.25
  -3 -18   1   -0.07    0.20
  -3 -18   1    0.19    0.31
   3  18  -1   -0.30    0.35
   3  18  -1   -0.41    0.29
  -3  18   1   -0.11    0.32
  -3  18   1   -0.08    0.32
   2 -18  -1    0.10    0.25
  -2 -18   1    0.03    0.23
   2 -18  -1   -0.36    0.22
  -2 -18   1   -0.31    0.27
  -2 -18   1    0.23    0.28
  -2 -18   1   -0.06    0.17
   2 -18  -1    0.11    0.31
   2  18  -1    0.08    0.32
   2  18  -1   -0.30    0.33
  -2  18   1   -0.08    0.30
  -2  18   1   -0.22    0.29
  -1 -18   1    0.53    0.34
   1 -18  -1    0.39    0.25
   1 -18  -1    0.38    0.30
  -1 -18   1    0.97    0.33
  -1 -18   1   -0.14    0.21
   1 -18  -1    0.50    0.29
   1  18  -1    0.46    0.35
  -1  18   1    0.70    0.40
   1  18  -1    0.29    0.29
  -1  18   1    0.28    0.34
   0 -18  -1    1.29    0.36
   0 -18   1    0.83    0.35
   0 -18  -1    1.01    0.34
   0 -18  -1    1.12    0.33
   0 -18   1    1.24    0.37
   0 -18   1    1.23    0.33
   0  18  -1    1.00    0.41
   0  18   1    0.85    0.39
   0  18  -1    1.21    0.44
   0  18   1    0.65    0.39
  -1 -18  -1    1.34    0.34
   1 -18   1    0.82    0.32
   1 -18   1    1.17    0.41
  -1 -18  -1    0.44    0.34
   1 -18   1    1.71    0.39
  -1 -18  -1    0.61    0.31
  -1  18  -1    1.18    0.41
   1  18   1    1.48    0.45
   1  18   1    0.72    0.39
  -1  18  -1    0.69    0.38
  -2 -18  -1    2.19    0.45
   2 -18   1    2.45    0.49
   2 -18   1    1.54    0.35
   2 -18   1    1.85    0.40
  -2 -18  -1    2.26    0.33
  -2 -18  -1    2.09    0.41
  -2 -18  -1    3.08    0.50
   2  18   1    1.55    0.47
   2  18   1    2.42    0.48
  -2  18  -1    2.19    0.51
  -2  18  -1    0.94    0.43
  -3 -18  -1    2.17    0.48
   3 -18   1    1.40    0.35
   3 -18   1    1.29    0.44
  -3 -18  -1    1.63    0.32
  -3 -18  -1    0.94    0.38
  -3 -18  -1    1.47    0.36
   3 -18   1    1.80    0.40
   3  18   1    1.00    0.50
  -3  18  -1    1.68    0.47
   3  18   1    1.83    0.50
  -3  18  -1    1.74    0.50
  -4 -18  -1    0.13    0.27
  -4 -18  -1    1.31    0.37
   4 -18   1    0.48    0.39
   4 -18   1    1.49    0.42
   4 -18   1    0.90    0.32
  -4 -18  -1    1.05    0.38
  -4  18  -1    0.13    0.34
   4  18   1    0.82    0.45
   4  18   1    1.15    0.40
  -4  18  -1    0.96    0.44
   5 -18   1    0.52    0.28
   5 -18   1    0.76    0.40
  -5 -18  -1   -0.37    0.27
  -5 -18  -1    0.29    0.34
  -5 -18  -1   -0.06    0.34
   5 -18   1    0.27    0.36
   5  18   1    1.11    0.54
  -5  18  -1    1.05    0.44
  -5  18  -1    1.14    0.49
   5  18   1    0.51    0.42
   6 -18   1    0.48    0.36
  -6 -18  -1   -0.11    0.32
  -6 -18  -1    0.29    0.37
  -6 -18  -1    0.46    0.35
   6 -18   1    0.05    0.37
   6  18   1   -0.18    0.35
  -6  18  -1    0.44    0.50
  -6  18  -1   -0.26    0.42
   6  18   1    0.05    0.37
  -7  18  -1    0.94    0.53
   7  18   1    0.48    0.55
  -7  18  -1    0.43    0.55
   7  18   1    0.68    0.43
  -6 -19   1   -0.08    0.40
  -6 -19   1   -0.46    0.38
   6 -19  -1    0.58    0.41
   6 -19  -1    0.06    0.37
  -6 -19   1    0.09    0.28
  -6  19   1   -0.48    0.43
   6  19  -1   -0.10    0.42
  -6  19   1   -0.47    0.44
   6  19  -1    0.15    0.39
  -5 -19   1    2.02    0.49
   5 -19  -1    1.78    0.53
  -5 -19   1    2.78    0.47
   5 -19  -1    2.45    0.50
  -5 -19   1    2.18    0.52
  -5  19   1    1.99    0.59
   5  19  -1    2.16    0.60
  -5  19   1    2.42    0.63
   5  19  -1    1.88    0.53
  -4 -19   1   -0.18    0.23
   4 -19  -1    0.12    0.35
  -4 -19   1    0.34    0.35
   4 -19  -1   -0.54    0.26
   4 -19  -1    0.00    0.26
   4  19  -1    0.83    0.40
  -4  19   1    0.02    0.37
   4  19  -1   -0.41    0.40
  -4  19   1   -0.14    0.36
  -3 -19   1   -0.21    0.19
   3 -19  -1   -0.13    0.26
   3 -19  -1   -0.06    0.32
  -3 -19   1   -0.26    0.33
  -3 -19   1   -0.45    0.28
  -3 -19   1   -0.31    0.31
   3 -19  -1   -0.01    0.27
   3  19  -1   -0.21    0.34
  -3  19   1    0.35    0.42
  -3  19   1   -0.16    0.40
  -2 -19   1    0.74    0.33
  -2 -19   1    0.54    0.34
   2 -19  -1    0.17    0.27
   2 -19  -1    0.70    0.39
  -2 -19   1    0.89    0.34
   2 -19  -1    0.80    0.31
   2  19  -1    1.14    0.43
  -2  19   1    0.69    0.39
  -2  19   1    0.64    0.42
   2  19  -1   -0.22    0.35
   1 -19  -1    4.35    0.53
  -1 -19   1    4.32    0.57
  -1 -19   1    3.79    0.59
   1 -19  -1    3.48    0.52
   1 -19  -1    3.87    0.60
  -1 -19   1    3.74    0.54
   1  19  -1    2.66    0.54
  -1  19   1    3.82    0.64
  -1  19   1    2.70    0.55
   1  19  -1    4.33    0.71
   0 -19  -1    1.17    0.41
   0 -19   1    1.87    0.45
   0 -19   1    0.97    0.35
   0 -19  -1    1.40    0.37
   0 -19   1    1.56    0.41
   0  19  -1    1.74    0.47
   0  19   1    0.53    0.44
   0  19  -1    0.93    0.45
   0  19   1    1.04    0.44
   1 -19   1    0.64    0.40
  -1 -19  -1    1.36    0.37
   1 -19   1    1.40    0.38
   1 -19   1    1.47    0.38
  -1 -19  -1    0.61    0.35
  -1 -19  -1    0.82    0.34
  -1  19  -1    1.02    0.49
   1  19   1    1.74    0.43
  -1  19  -1    1.32    0.46
   1  19   1    0.69    0.44
   2 -19   1    0.65    0.36
   2 -19   1   -0.03    0.23
  -2 -19  -1   -0.06    0.28
  -2 -19  -1    0.09    0.32
   2 -19   1    0.33    0.30
  -2 -19  -1    0.23    0.28
  -2  19  -1    0.07    0.36
   2  19   1   -0.30    0.29
  -2  19  -1    0.08    0.31
   3 -19   1    0.01    0.30
  -3 -19  -1    0.04    0.27
  -3 -19  -1    0.25    0.24
  -3 -19  -1    0.08    0.31
   3 -19   1    0.27    0.43
   3 -19   1    0.49    0.31
  -3 -19  -1    0.53    0.40
   3  19   1    0.37    0.36
  -3  19  -1    0.23    0.37
  -3  19  -1    0.25    0.36
   3  19   1   -0.21    0.33
  -4 -19  -1   -0.07    0.36
   4 -19   1    0.49    0.32
  -4 -19  -1    0.71    0.36
   4 -19   1    0.23    0.32
   4 -19   1    0.38    0.38
  -4 -19  -1    0.68    0.26
  -4  19  -1   -0.23    0.37
  -4  19  -1   -0.10    0.38
   4  19   1    0.62    0.45
   4  19   1    0.81    0.40
  -5 -19  -1    0.24    0.30
  -5 -19  -1    0.48    0.44
   5 -19   1    0.20    0.39
   5 -19   1    0.37    0.32
  -5 -19  -1    0.07    0.32
   5 -19   1    0.30    0.38
   5  19   1    0.66    0.43
  -5  19  -1    0.45    0.46
   5  19   1   -0.15    0.40
  -5  19  -1    0.52    0.49
   6 -19   1    1.81    0.56
   6 -19   1    2.50    0.58
  -6 -19  -1    2.73    0.56
  -6 -19  -1    2.81    0.53
  -6 -19  -1    3.22    0.60
   6  19   1    2.63    0.66
  -6  19  -1    2.23    0.62
  -6  19  -1    2.91    0.69
   6  19   1    2.22    0.62
   5 -20  -1   -0.11    0.36
  -5 -20   1   -0.19    0.40
   5 -20  -1   -0.54    0.37
  -5 -20   1    0.01    0.31
  -5 -20   1    0.42    0.40
   5  20  -1    0.20    0.49
  -5  20   1    0.61    0.45
   5  20  -1    0.07    0.46
  -5  20   1    0.18    0.53
   4 -20  -1   -0.32    0.30
  -4 -20   1    0.15    0.35
   4 -20  -1    0.33    0.39
   4 -20  -1   -0.37    0.27
  -4 -20   1   -0.08    0.25
  -4 -20   1   -0.09    0.36
  -4  20   1    0.60    0.45
   4  20  -1    0.49    0.49
  -4  20   1    0.16    0.39
   4  20  -1    0.26    0.41
   3 -20  -1    0.12    0.33
   3 -20  -1    0.49    0.33
  -3 -20   1    0.50    0.40
  -3 -20   1    0.18    0.31
   3 -20  -1   -0.29    0.29
  -3 -20   1   -0.02    0.35
  -3  20   1    0.21    0.45
   3  20  -1   -0.26    0.35
  -3  20   1    0.45    0.39
  -2 -20   1    0.53    0.36
   2 -20  -1    0.21    0.32
   2 -20  -1    0.54    0.32
  -2 -20   1    0.08    0.33
   2 -20  -1   -0.02    0.36
  -2  20   1    1.09    0.41
  -2  20   1    0.09    0.42
   2  20  -1    0.23    0.45
   2  20  -1    0.50    0.46
  -1 -20   1    1.65    0.46
  -1 -20   1    0.78    0.38
  -1 -20   1    0.96    0.46
   1 -20  -1    2.03    0.43
   1 -20  -1    1.54    0.46
   1  20  -1    0.90    0.47
  -1  20   1    1.93    0.51
  -1  20   1    1.00    0.46
   1  20  -1    1.12    0.47
   0 -20  -1    3.15    0.63
   0 -20   1    2.24    0.53
   0 -20   1    2.40    0.47
   0 -20  -1    2.60    0.46
   0 -20   1    3.37    0.52
   0 -20  -1    2.26    0.50
   0  20   1    3.60    0.64
   0  20  -1    3.23    0.68
   0  20   1    2.07    0.61
   0  20  -1    2.96    0.59
   1 -20   1    0.97    0.40
  -1 -20  -1    0.28    0.36
  -1 -20  -1    0.31    0.31
  -1 -20  -1    0.53    0.36
   1 -20   1   -0.14    0.31
   1 -20   1   -0.07    0.23
  -1  20  -1   -0.15    0.34
   1  20   1    0.32    0.41
   1  20   1    0.78    0.42
  -1  20  -1   -0.80    0.34
  -2 -20  -1    0.36    0.33
   2 -20   1   -0.02    0.32
  -2 -20  -1    0.39    0.35
   2 -20   1    0.64    0.42
   2 -20   1    0.36    0.28
  -2 -20  -1    0.63    0.38
  -2  20  -1    0.85    0.53
  -2  20  -1    0.40    0.36
   2  20   1    0.78    0.43
  -3 -20  -1   -0.42    0.34
   3 -20   1   -0.06    0.29
  -3 -20  -1   -0.13    0.29
  -3 -20  -1    0.21    0.32
   3 -20   1    0.20    0.33
   3 -20   1    0.08    0.34
   3  20   1   -0.06    0.39
   3  20   1    0.46    0.39
  -3  20  -1   -0.10    0.39
  -3  20  -1    0.34    0.43
  -4 -20  -1    0.14    0.35
  -4 -20  -1    0.79    0.32
  -4 -20  -1   -0.24    0.34
   4 -20   1    0.25    0.36
   4 -20   1    0.48    0.33
   4 -20   1    0.39    0.40
   4  20   1    1.10    0.48
  -4  20  -1    0.78    0.46
  -4  20  -1    0.06    0.41
   4  20   1    0.05    0.41
  -5 -20  -1    2.16    0.46
  -5 -20  -1    2.73    0.58
   5 -20   1    2.08    0.51
   5 -20   1    1.56    0.51
  -5 -20  -1    1.71    0.47
   5 -20   1    2.48    0.47
  -5  20  -1    2.09    0.60
   5  20   1    2.06    0.62
   5  20   1    1.94    0.68
  -5  20  -1    1.58    0.55
  -4 -21   1    0.56    0.42
   4 -21  -1    0.35    0.38
   4 -21  -1   -0.08    0.34
   4  21  -1    0.43    0.45
   4  21  -1   -0.16    0.49
  -4  21   1    0.70    0.51
  -4  21   1    0.87    0.48
   3 -21  -1    5.55    0.77
   3 -21  -1    5.32    0.66
  -3 -21   1    4.41    0.69
  -3 -21   1    4.46    0.67
  -3 -21   1    5.15    0.75
  -3  21   1    3.16    0.70
  -3  21   1    4.99    0.83
   3  21  -1    3.86    0.69
   3  21  -1    4.29    0.79
   2 -21  -1    1.62    0.48
  -2 -21   1    0.48    0.39
   2 -21  -1    0.68    0.36
  -2 -21   1    0.79    0.41
  -2 -21   1    1.99    0.49
  -2  21   1    1.04    0.50
  -2  21   1    1.23    0.56
   2  21  -1    0.84    0.53
   1 -21  -1    1.21    0.38
   1 -21  -1   -0.11    0.30
  -1 -21   1    0.04    0.33
  -1 -21   1    0.77    0.43
  -1 -21   1    0.85    0.40
   1 -21  -1    1.08    0.42
   1  21  -1    0.92    0.51
   1  21  -1    0.16    0.40
  -1  21   1   -0.64    0.39
  -1  21   1    0.43    0.40
   0 -21   1    0.06    0.29
   0 -21   1    0.72    0.43
   0 -21  -1    0.34    0.32
   0 -21  -1    0.90    0.39
   0 -21  -1    1.01    0.44
   0 -21   1    0.38    0.36
   0  21   1    0.34    0.49
   0  21  -1    0.59    0.46
   0  21  -1    0.92    0.49
   0  21   1    0.29    0.45
   1 -21   1    0.00    0.40
  -1 -21  -1    0.30    0.33
   1 -21   1    0.08    0.32
  -1 -21  -1    0.14    0.32
  -1 -21  -1   -0.25    0.40
   1 -21   1    0.30    0.34
  -1  21  -1   -0.35    0.36
  -1  21  -1    0.67    0.48
   1  21   1    0.71    0.44
   1  21   1   -0.25    0.35
   2 -21   1    1.19    0.42
   2 -21   1    1.85    0.52
   2 -21   1    2.29    0.50
  -2 -21  -1    2.07    0.49
  -2 -21  -1    1.18    0.51
  -2 -21  -1    1.87    0.50
  -2  21  -1    2.53    0.60
   2  21   1    1.44    0.55
  -2  21  -1    1.69    0.58
   3 -21   1    0.71    0.32
   3 -21   1    1.06    0.43
   3 -21   1    0.58    0.38
  -3 -21  -1    0.45    0.38
  -3 -21  -1    0.50    0.38
  -3 -21  -1    0.15    0.41
   3  21   1    0.42    0.48
  -3  21  -1    1.01    0.60
   3  21   1    0.48    0.50
  -3  21  -1    0.88    0.51
  -1 -22   1    0.67    0.47
   1 -22  -1    1.20    0.45
   1 -22  -1   -0.02    0.33
   1 -22  -1    0.42    0.39
  -1 -22   1    0.64    0.40
   1  22  -1   -0.10    0.49
  -1  22   1    0.07    0.52
   1  22  -1    0.62    0.53
  -1  22   1    0.87    0.51
   0 -22   1    1.47    0.49
   0 -22  -1    1.98    0.58
   0 -22   1    2.23    0.53
   0 -22  -1    2.48    0.53
   0 -22  -1    2.13    0.50
   0 -22   1    2.13    0.59
   0  22  -1    1.04    0.53
   0  22   1    2.29    0.59
   0  22  -1    2.44    0.68
   0  22   1    1.61    0.56
   1 -22   1    3.49    0.57
  -1 -22  -1    4.76    0.68
   1 -22   1    4.57    0.73
   1 -22   1    3.62    0.62
  -1 -22  -1    3.26    0.55
  -1 -22  -1    4.65    0.71
  -1  22  -1    1.97    0.65
  -1  22  -1    4.40    0.74
   1  22   1    2.96    0.72
 -12   0   2    0.39    0.39
 -12   0   2    0.08    0.30
  12   0  -2    0.31    0.44
  12   0  -2    0.05    0.40
  11   0  -2    2.75    0.54
 -11   0   2    2.53    0.56
 -11   0   2    1.90    0.38
  11   0  -2    2.29    0.55
 -10   0   2    0.18    0.25
 -10   0   2   -0.25    0.31
  10   0  -2    0.58    0.31
  10   0  -2   -0.21    0.29
  10   0  -2   -0.21    0.30
 -10   0   2    0.10    0.23
   9   0  -2    1.07    0.36
   9   0  -2    0.29    0.25
  -9   0   2    0.68    0.23
  -9   0   2    0.35    0.27
   9   0  -2    1.96    0.46
  -9   0   2    0.88    0.27
   9   0  -2    0.73    0.32
   8   0  -2    1.70    0.40
  -8   0   2    1.56    0.35
  -8   0   2    1.51    0.30
  -8   0   2    1.04    0.26
   8   0  -2    1.91    0.36
   8   0  -2    1.20    0.29
  -7   0   2    7.54    0.54
   7   0  -2    7.01    0.55
  -7   0   2    6.88    0.43
  -7   0   2    8.03    0.50
   7   0  -2    7.73    0.60
   7   0  -2    8.96    0.52
  -6   0   2    6.02    0.40
  -6   0   2    5.44    0.44
   6   0  -2    6.18    0.45
   6   0  -2    5.71    0.38
   6   0  -2    5.68    0.47
  -6   0   2    6.59    0.35
   5   0  -2    0.49    0.14
  -5   0   2    0.50    0.14
   5   0  -2    0.73    0.19
  -5   0   2    0.49    0.09
  -5   0   2    0.28    0.13
   5   0  -2    0.56    0.21
  -5   0   2    0.28    0.17
  -4   0   2    0.76    0.09
   4   0  -2    0.73    0.18
   4   0  -2    0.83    0.22
   4   0  -2    0.78    0.14
  -4   0   2    0.64    0.17
  -4   0   2    0.59    0.15
   3   0  -2    3.51    0.24
  -3   0   2    3.27    0.21
   3   0  -2    3.49    0.32
  -3   0   2    3.27    0.24
  -3   0   2    2.89    0.11
   3   0  -2    2.59    0.19
  -2   0   2   84.64    1.96
   2   0  -2   85.60    1.90
   2   0  -2   83.40    2.01
   2   0  -2   83.40    1.88
  -2   0   2   84.90    1.81
  -2   0   2   83.50    1.87
  -1   0   2   33.53    0.76
   1   0  -2   34.10    0.85
   1   0  -2   33.22    0.77
   1   0  -2   33.79    0.83
   0   0  -2   45.08    0.98
   0   0  -2   44.11    1.08
   0   0  -2   43.92    1.01
   0   0  -2   44.31    1.03
   1   0   2    7.84    0.22
   1   0   2    8.01    0.29
  -1   0  -2    7.62    0.26
  -1   0  -2    8.02    0.26
  -1   0  -2    8.17    0.29
  -1   0  -2    8.14    0.26
   1   0   2    7.81    0.26
  -1   0  -2    8.32    0.29
  -1   0  -2    7.43    0.31
   2   0   2    0.42    0.09
   2   0   2    0.43    0.10
  -2   0  -2    0.48    0.11
  -2   0  -2    0.37    0.09
  -2   0  -2    0.61    0.10
  -2   0  -2    0.43    0.13
   2   0   2    0.35    0.13
  -2   0  -2    0.37    0.10
   3   0   2    0.20    0.12
   3   0   2    0.17    0.09
  -3   0  -2    0.03    0.10
  -3   0  -2    0.19    0.09
  -3   0  -2    0.30    0.14
   3   0   2    0.15    0.15
  -3   0  -2    0.21    0.10
   4   0   2    1.37    0.20
  -4   0  -2    1.58    0.24
  -4   0  -2    1.37    0.18
   4   0   2    1.64    0.26
   4   0   2    1.34    0.22
  -4   0  -2    1.24    0.19
  -4   0  -2    1.71    0.18
  -5   0  -2    5.94    0.31
  -5   0  -2    5.10    0.36
  -5   0  -2    5.81    0.41
   5   0   2    5.70    0.39
   5   0   2    5.32    0.35
   5   0   2    5.76    0.44
  -5   0  -2    5.81    0.33
  -6   0  -2    0.01    0.13
  -6   0  -2    0.26    0.18
   6   0   2    0.25    0.15
   6   0   2    0.39    0.22
   6   0   2    0.01    0.18
  -6   0  -2    0.05    0.18
  -6   0  -2    0.16    0.12
  -7   0  -2    0.58    0.20
  -7   0  -2    0.58    0.23
  -7   0  -2    0.40    0.27
   7   0   2    0.49    0.20
  -7   0  -2    0.40    0.19
   7   0   2    0.66    0.27
   7   0   2    0.51    0.27
  -8   0  -2    8.35    0.65
  -8   0  -2   10.15    0.56
   8   0   2    8.27    0.69
  -8   0  -2    8.68    0.61
  -8   0  -2    8.68    0.50
   8   0   2    9.70    0.67
  -9   0  -2    0.04    0.30
  -9   0  -2    0.02    0.19
   9   0   2    1.04    0.41
 -10   0  -2    0.95    0.40
 -10   0  -2    1.15    0.40
  10   0   2    1.32    0.49
 -10   0  -2    1.79    0.35
  11   0   2   13.08    0.97
 -11   0  -2   15.10    0.84
 -11   0  -2   13.37    1.05
  11   0   2   12.22    1.18
 -11   0  -2   13.35    0.95
  12  -1  -2    0.52    0.41
  12  -1  -2    0.07    0.44
 -12  -1   2    0.02    0.31
 -12  -1   2    0.39    0.45
  12   1  -2    0.48    0.45
 -12   1   2    0.45    0.39
  12   1  -2    0.17    0.45
  11  -1  -2   -0.28    0.39
  11  -1  -2   -0.16    0.35
 -11  -1   2    0.33    0.37
 -11  -1   2    0.40    0.31
 -11   1   2   -0.40    0.37
 -11   1   2    0.15    0.28
  11   1  -2    0.17    0.40
  11   1  -2   -0.31    0.35
 -10  -1   2   -0.23    0.22
  10  -1  -2   -0.31    0.24
  10  -1  -2   -0.02    0.29
 -10  -1   2    0.04    0.33
  10  -1  -2    0.20    0.32
 -10   1   2    0.13    0.25
 -10   1   2    0.21    0.29
  10   1  -2    0.24    0.35
 -10   1   2   -0.15    0.21
  10   1  -2   -0.10    0.30
  10   1  -2    0.27    0.30
  -9  -1   2    0.28    0.20
   9  -1  -2    0.34    0.23
   9  -1  -2    0.87    0.34
   9  -1  -2   -0.03    0.27
  -9  -1   2    0.54    0.24
  -9  -1   2    0.20    0.30
  -9   1   2    0.66    0.27
   9   1  -2    0.44    0.29
  -9   1   2    0.74    0.24
   9   1  -2    0.79    0.38
  -9   1   2    0.65    0.29
   9   1  -2    0.33    0.28
   8  -1  -2    2.07    0.34
   8  -1  -2    2.85    0.43
   8  -1  -2    2.00    0.42
   8  -1  -2    3.09    0.48
  -8  -1   2    2.85    0.35
  -8  -1   2    2.27    0.39
   8   1  -2    3.91    0.55
   8   1  -2    2.76    0.37
  -8   1   2    2.31    0.30
   8   1  -2    2.63    0.42
  -8   1   2    2.68    0.38
  -8   1   2    2.34    0.40
   7  -1  -2   10.59    0.69
   7  -1  -2   11.98    0.65
   7  -1  -2   11.72    0.67
  -7  -1   2   11.78    0.66
   7  -1  -2   12.45    0.63
  -7  -1   2   10.80    0.54
  -7  -1   2   11.09    0.59
  -7   1   2   12.55    0.55
   7   1  -2   11.85    0.66
   7   1  -2   11.54    0.60
   7   1  -2   12.93    0.76
  -7   1   2   11.95    0.59
  -7   1   2   12.99    0.71
   6  -1  -2   -0.09    0.13
  -6  -1   2    0.23    0.10
  -6  -1   2    0.21    0.12
  -6  -1   2    0.23    0.19
   6  -1  -2   -0.02    0.12
   6  -1  -2    0.22    0.20
   6  -1  -2   -0.02    0.15
  -6  -1   2    0.03    0.16
  -6   1   2    0.04    0.16
  -6   1   2    0.24    0.12
  -6   1   2    0.30    0.16
   6   1  -2    0.09    0.16
   6   1  -2    0.27    0.15
   6   1  -2    0.03    0.21
  -5  -1   2    0.05    0.15
   5  -1  -2    0.04    0.11
   5  -1  -2   -0.05    0.11
  -5  -1   2    0.05    0.11
  -5  -1   2    0.02    0.12
   5  -1  -2    0.14    0.15
   5  -1  -2    0.27    0.19
  -5  -1   2   -0.02    0.07
   5   1  -2    0.07    0.18
  -5   1   2    0.17    0.12
   5   1  -2    0.18    0.12
   5   1  -2   -0.10    0.12
  -5   1   2    0.11    0.14
  -5   1   2    0.22    0.11
   4  -1  -2    0.96    0.15
  -4  -1   2    1.06    0.20
  -4  -1   2    1.14    0.12
   4  -1  -2    0.84    0.22
   4  -1  -2    1.05    0.19
   4  -1  -2    1.25    0.20
  -4  -1   2    0.97    0.17
   4   1  -2    0.95    0.19
   4   1  -2    0.97    0.23
   4   1  -2    1.28    0.18
  -4   1   2    1.02    0.20
  -4   1   2    1.57    0.19
   3  -1  -2    2.09    0.20
   3  -1  -2    1.43    0.19
   3  -1  -2    1.85    0.17
  -3  -1   2    1.44    0.19
  -3  -1   2    1.68    0.17
   3  -1  -2    1.49    0.23
   3   1  -2    1.67    0.16
   3   1  -2    2.10    0.26
  -3   1   2    1.58    0.21
  -3   1   2    1.78    0.17
   3   1  -2    1.57    0.18
   2  -1  -2    3.66    0.24
   2  -1  -2    3.79    0.19
   2  -1  -2    3.70    0.20
  -2  -1   2    3.55    0.14
   2  -1  -2    3.31    0.16
  -2  -1   2    3.52    0.21
  -2  -1   2    3.86    0.20
   2   1  -2    3.65    0.25
   2   1  -2    3.56    0.19
  -2   1   2    3.72    0.23
   2   1  -2    3.48    0.18
   1  -1  -2   15.79    0.38
   1  -1  -2   16.44    0.42
   1  -1  -2   15.52    0.39
   1  -1  -2   16.18    0.38
  -1  -1   2   16.81    0.43
   1   1  -2   16.52    0.43
   1   1  -2   15.95    0.44
   1   1  -2   15.85    0.47
   1   1  -2   16.26    0.48
   0  -1  -2    1.60    0.13
   0  -1  -2    1.64    0.12
   0  -1  -2    1.67    0.10
   0  -1   2    1.38    0.09
   0  -1  -2    1.77    0.13
   0   1  -2    1.68    0.12
   0   1  -2    1.80    0.10
   0   1  -2    1.74    0.12
   0   1  -2    1.79    0.15
   0   1  -2    1.61    0.11
   1  -1   2   34.98    0.87
  -1  -1  -2   34.08    0.87
  -1  -1  -2   33.51    0.80
  -1  -1  -2   33.94    0.77
  -1  -1  -2   33.46    0.85
  -1  -1  -2   33.62    0.84
  -1   1  -2   34.60    0.87
  -1   1  -2   34.74    0.85
  -1   1  -2   35.71    0.84
  -1   1  -2   34.50    0.83
  -1   1  -2   34.33    0.88
   1   1   2   34.35    0.87
   1   1   2   34.68    0.81
  -2  -1  -2    0.65    0.13
   2  -1   2    0.74    0.15
  -2  -1  -2    0.82    0.12
   2  -1   2    0.67    0.12
  -2  -1  -2    0.59    0.08
  -2  -1  -2    0.65    0.12
  -2  -1  -2    0.52    0.13
  -2  -1  -2    0.74    0.12
   2   1   2    0.71    0.15
   2   1   2    0.77    0.11
   2   1   2    0.79    0.12
  -2   1  -2    0.62    0.12
  -2   1  -2    0.82    0.11
  -2   1  -2    0.53    0.14
  -2   1  -2    0.68    0.13
  -2   1  -2    0.75    0.12
  -3  -1  -2    0.14    0.11
  -3  -1  -2    0.03    0.08
   3  -1   2   -0.04    0.08
   3  -1   2   -0.08    0.11
  -3  -1  -2    0.15    0.10
  -3  -1  -2    0.16    0.07
   3  -1   2   -0.07    0.14
  -3  -1  -2    0.06    0.11
  -3  -1  -2    0.04    0.11
  -3   1  -2   -0.19    0.10
  -3   1  -2    0.05    0.09
  -3   1  -2   -0.06    0.09
   3   1   2    0.08    0.08
   3   1   2    0.02    0.13
  -3   1  -2    0.05    0.08
   3   1   2    0.03    0.11
   4  -1   2   29.83    0.90
   4  -1   2   29.29    0.87
  -4  -1  -2   28.50    0.87
  -4  -1  -2   29.42    0.94
  -4  -1  -2   28.22    0.84
   4  -1   2   29.02    0.97
  -4  -1  -2   28.81    0.84
  -4  -1  -2   29.50    0.75
   4   1   2   30.20    0.86
   4   1   2   27.20    0.90
   4   1   2   28.12    0.96
  -4   1  -2   28.77    0.87
  -4   1  -2   28.38    0.83
  -4   1  -2   27.99    0.80
  -4   1  -2   29.65    0.95
   5  -1   2    1.00    0.22
   5  -1   2    1.27    0.21
  -5  -1  -2    1.20    0.20
  -5  -1  -2    1.12    0.21
   5  -1   2    1.65    0.29
  -5  -1  -2    1.22    0.16
  -5  -1  -2    0.84    0.23
   5   1   2    0.86    0.18
  -5   1  -2    1.38    0.20
   5   1   2    1.30    0.27
  -5   1  -2    1.28    0.25
  -5   1  -2    1.08    0.19
  -5   1  -2    1.11    0.21
   5   1   2    1.12    0.23
   6  -1   2    2.10    0.32
  -6  -1  -2    2.33    0.24
  -6  -1  -2    2.60    0.37
  -6  -1  -2    2.18    0.27
   6  -1   2    1.48    0.24
   6  -1   2    2.05    0.35
  -6  -1  -2    2.15    0.30
  -6   1  -2    2.17    0.25
  -6   1  -2    2.18    0.28
   6   1   2    1.97    0.27
   6   1   2    1.65    0.33
  -6   1  -2    2.53    0.33
  -6   1  -2    2.40    0.35
   6   1   2    2.46    0.36
   7  -1   2    0.09    0.16
  -7  -1  -2    0.00    0.17
   7  -1   2    0.24    0.27
  -7  -1  -2    0.04    0.15
  -7  -1  -2   -0.13    0.13
  -7  -1  -2   -0.22    0.17
   7   1   2   -0.10    0.16
  -7   1  -2    0.03    0.17
   7   1   2    0.10    0.22
  -7   1  -2    0.02    0.13
  -7   1  -2   -0.09    0.20
  -7   1  -2    0.25    0.18
   7   1   2    0.48    0.25
  -8  -1  -2   -0.23    0.20
   8  -1   2    0.03    0.19
   8  -1   2    0.04    0.25
  -8  -1  -2    0.56    0.27
  -8  -1  -2   -0.05    0.15
  -8   1  -2    0.25    0.26
   8   1   2   -0.30    0.28
  -8   1  -2    0.08    0.22
   8   1   2   -0.44    0.19
  -8   1  -2   -0.27    0.17
  -8   1  -2   -0.22    0.17
  -9  -1  -2    0.86    0.28
  -9  -1  -2    0.45    0.28
  -9  -1  -2    0.33    0.30
   9  -1   2    0.99    0.38
   9  -1   2    0.70    0.37
   9   1   2    0.12    0.31
   9   1   2    1.28    0.38
  -9   1  -2    0.65    0.23
  -9   1  -2    1.24    0.38
  10  -1   2    0.37    0.43
 -10  -1  -2   -0.04    0.35
 -10  -1  -2    0.10    0.27
  10  -1   2    0.51    0.36
 -10  -1  -2    0.47    0.33
  10   1   2    0.61    0.44
 -10   1  -2    0.30    0.30
 -10   1  -2   -0.10    0.23
 -10   1  -2    0.35    0.37
 -11  -1  -2    0.90    0.38
  11  -1   2    1.26    0.48
 -11  -1  -2    0.95    0.38
 -11  -1  -2    1.20    0.46
  11  -1   2    1.36    0.51
 -11   1  -2    1.22    0.53
 -11   1  -2    0.80    0.32
 -11   1  -2    0.95    0.45
  11   1   2    0.98    0.46
 -12  -2   2    0.05    0.31
  12  -2  -2    0.18    0.43
  12  -2  -2   -0.10    0.41
 -12  -2   2    0.83    0.44
  12   2  -2    0.54    0.50
  12   2  -2    0.72    0.46
 -12   2   2    0.55    0.40
  11  -2  -2    0.94    0.39
  11  -2  -2    0.18    0.35
 -11  -2   2   -0.04    0.33
 -11  -2   2    0.21    0.29
 -11   2   2    0.66    0.27
  11   2  -2    0.89    0.43
 -11   2   2    0.41    0.37
  11   2  -2    0.27    0.35
  11   2  -2   -0.30    0.36
 -10  -2   2    0.32    0.31
  10  -2  -2    0.00    0.31
 -10  -2   2    0.12    0.25
  10  -2  -2   -0.02    0.27
  10  -2  -2   -0.17    0.27
 -10   2   2    0.02    0.22
 -10   2   2    0.28    0.30
 -10   2   2   -0.15    0.26
  10   2  -2    0.26    0.34
  10   2  -2   -0.05    0.33
  -9  -2   2   -0.18    0.19
   9  -2  -2   -0.10    0.22
  -9  -2   2   -0.03    0.18
   9  -2  -2   -0.38    0.27
  -9  -2   2   -0.06    0.23
   9  -2  -2   -0.03    0.22
  -9   2   2    0.10    0.16
  -9   2   2   -0.21    0.21
   9   2  -2   -0.10    0.28
   9   2  -2   -0.27    0.24
   9   2  -2   -0.09    0.23
  -9   2   2    0.02    0.23
   8  -2  -2   11.79    0.68
  -8  -2   2   12.26    0.64
  -8  -2   2   12.69    0.75
   8  -2  -2   12.96    0.78
   8  -2  -2   11.54    0.69
   8   2  -2   12.54    0.85
   8   2  -2   12.53    0.70
   8   2  -2   14.91    0.81
  -8   2   2   13.69    0.71
  -8   2   2   13.46    0.78
  -8   2   2   12.01    0.58
   7  -2  -2    1.88    0.36
   7  -2  -2    2.43    0.33
  -7  -2   2    2.33    0.35
  -7  -2   2    1.99    0.32
  -7  -2   2    2.39    0.23
   7  -2  -2    2.18    0.33
  -7  -2   2    2.18    0.30
   7   2  -2    2.17    0.37
  -7   2   2    1.87    0.25
   7   2  -2    2.17    0.33
  -7   2   2    1.90    0.30
   7   2  -2    1.13    0.35
  -7   2   2    2.52    0.39
   6  -2  -2    2.07    0.32
  -6  -2   2    3.39    0.22
   6  -2  -2    3.10    0.32
  -6  -2   2    3.71    0.29
  -6  -2   2    3.27    0.34
  -6  -2   2    3.05    0.35
   6  -2  -2    3.01    0.34
  -6   2   2    2.02    0.32
  -6   2   2    2.99    0.30
   6   2  -2    3.68    0.34
   6   2  -2    3.10    0.42
  -6   2   2    3.13    0.25
   6   2  -2    3.48    0.39
  -5  -2   2    1.06    0.14
   5  -2  -2    1.08    0.18
  -5  -2   2    1.29    0.21
  -5  -2   2    1.16    0.21
  -5  -2   2    1.03    0.18
   5  -2  -2    1.00    0.20
   5  -2  -2    1.42    0.25
   5   2  -2    1.08    0.21
  -5   2   2    1.35    0.24
  -5   2   2    1.21    0.19
  -5   2   2    0.90    0.15
   5   2  -2    1.30    0.30
   5   2  -2    1.30    0.20
   4  -2  -2    3.53    0.25
  -4  -2   2    3.92    0.28
  -4  -2   2    3.89    0.20
   4  -2  -2    4.26    0.30
  -4  -2   2    4.07    0.30
   4  -2  -2    3.93    0.31
   4   2  -2    4.01    0.39
  -4   2   2    3.95    0.25
   4   2  -2    3.87    0.26
  -4   2   2    3.64    0.30
   4   2  -2    3.75    0.28
   3  -2  -2    4.47    0.23
  -3  -2   2    4.57    0.27
  -3  -2   2    4.16    0.20
  -3  -2   2    4.38    0.26
   3  -2  -2    4.63    0.28
   3  -2  -2    4.44    0.27
   3   2  -2    4.55    0.25
  -3   2   2    4.05    0.28
   3   2  -2    4.46    0.32
  -3   2   2    4.65    0.23
   3   2  -2    4.07    0.24
   2  -2  -2   12.49    0.41
  -2  -2   2   12.58    0.37
   2  -2  -2   12.82    0.43
  -2  -2   2   12.20    0.41
  -2  -2   2   11.95    0.40
   2  -2  -2   11.79    0.35
  -2   2   2   12.50    0.45
   2   2  -2   12.26    0.39
   2   2  -2   12.26    0.48
   2   2  -2   12.13    0.38
  -1  -2   2  156.65    3.39
   1  -2  -2  153.94    3.55
  -1  -2   2  156.95    3.40
   1  -2  -2  159.13    3.46
  -1  -2   2  158.72    3.36
   1  -2  -2  159.40    3.36
   1  -2  -2  153.45    3.45
   1   2  -2  154.59    3.49
   1   2  -2  152.85    3.38
   1   2  -2  158.76    3.44
   1   2  -2  156.72    3.37
   0  -2   2    7.26    0.26
   0  -2   2    7.21    0.24
   0  -2  -2    7.28    0.26
   0  -2  -2    7.23    0.27
   0  -2  -2    7.69    0.26
   0  -2   2    7.56    0.25
   0   2  -2    7.66    0.26
   0   2  -2    7.64    0.26
   0   2  -2    7.38    0.25
   0   2  -2    7.20    0.30
  -1  -2  -2   22.70    0.61
  -1  -2  -2   22.24    0.59
  -1  -2  -2   23.16    0.62
  -1  -2  -2   20.77    0.54
  -1  -2  -2   21.91    0.58
  -1  -2  -2   22.29    0.54
   1  -2   2   22.84    0.62
   1  -2   2   23.16    0.63
   1   2   2   21.74    0.60
  -1   2  -2   22.06    0.62
  -1   2  -2   22.67    0.60
  -1   2  -2   22.28    0.59
   1   2   2   22.67    0.64
  -1   2  -2   22.28    0.60
  -1   2  -2   22.23    0.63
  -2  -2  -2    1.22    0.15
  -2  -2  -2    0.85    0.15
   2  -2   2    0.97    0.13
  -2  -2  -2    0.96    0.12
  -2  -2  -2    1.06    0.14
   2  -2   2    1.02    0.16
  -2  -2  -2    1.16    0.14
  -2  -2  -2    1.08    0.13
  -2   2  -2    1.02    0.14
  -2   2  -2    0.97    0.17
  -2   2  -2    0.79    0.13
   2   2   2    1.10    0.12
  -2   2  -2    1.09    0.13
   2   2   2    0.88    0.16
   2   2   2    1.03    0.15
  -2   2  -2    0.97    0.16
  -3  -2  -2    5.33    0.32
  -3  -2  -2    5.49    0.28
  -3  -2  -2    5.82    0.31
  -3  -2  -2    5.44    0.30
   3  -2   2    5.59    0.30
   3  -2   2    5.44    0.35
  -3  -2  -2    5.59    0.29
  -3  -2  -2    5.89    0.18
   3   2   2    5.67    0.27
   3   2   2    6.01    0.35
  -3   2  -2    5.67    0.34
  -3   2  -2    6.12    0.31
   3   2   2    4.46    0.29
  -3   2  -2    5.85    0.26
  -3   2  -2    5.94    0.31
  -4  -2  -2   20.43    0.67
  -4  -2  -2   20.08    0.68
  -4  -2  -2   19.46    0.66
   4  -2   2   20.83    0.78
  -4  -2  -2   20.72    0.53
   4  -2   2   20.11    0.68
  -4  -2  -2   21.92    0.75
   4   2   2   20.81    0.66
  -4   2  -2   19.97    0.68
   4   2   2   18.09    0.74
  -4   2  -2   19.70    0.67
   4   2   2   20.09    0.73
  -4   2  -2   19.64    0.75
  -4   2  -2   19.42    0.60
  -5  -2  -2    1.66    0.16
  -5  -2  -2    1.48    0.24
  -5  -2  -2    1.56    0.25
   5  -2   2    1.30    0.28
  -5  -2  -2    1.53    0.22
   5  -2   2    1.48    0.22
  -5  -2  -2    1.26    0.20
  -5   2  -2    1.40    0.22
  -5   2  -2    1.38    0.19
   5   2   2    1.14    0.26
   5   2   2    1.58    0.21
   5   2   2    1.48    0.27
  -5   2  -2    1.53    0.23
  -5   2  -2    1.81    0.28
  -6  -2  -2   15.29    0.64
  -6  -2  -2   15.62    0.73
  -6  -2  -2   16.02    0.68
   6  -2   2   15.01    0.77
   6  -2   2   16.16    0.68
  -6  -2  -2   16.11    0.63
  -6  -2  -2   14.85    0.51
  -6   2  -2   14.95    0.74
  -6   2  -2   16.12    0.60
   6   2   2   15.59    0.75
  -6   2  -2   15.16    0.64
  -6   2  -2   14.86    0.67
   6   2   2   15.28    0.64
   6   2   2   16.50    0.81
  -7  -2  -2   11.49    0.60
  -7  -2  -2   10.20    0.61
  -7  -2  -2   11.42    0.69
   7  -2   2   11.85    0.62
  -7  -2  -2   11.79    0.47
   7  -2   2   10.83    0.70
   7   2   2   11.61    0.72
  -7   2  -2   11.37    0.70
  -7   2  -2   10.37    0.56
   7   2   2   11.97    0.61
   7   2   2   10.89    0.68
  -7   2  -2   11.42    0.63
  -7   2  -2   11.35    0.54
   8  -2   2    0.14    0.25
  -8  -2  -2    0.07    0.17
   8  -2   2   -0.10    0.23
   8  -2   2   -0.02    0.20
  -8  -2  -2   -0.09    0.20
  -8  -2  -2    0.18    0.22
  -8   2  -2    0.01    0.19
  -8   2  -2    0.16    0.17
   8   2   2    0.37    0.29
   8   2   2    0.13    0.30
  -8   2  -2    0.10    0.26
  -9  -2  -2   -0.17    0.28
   9  -2   2    0.19    0.33
   9  -2   2    0.32    0.33
  -9  -2  -2   -0.47    0.24
  -9  -2  -2    0.01    0.20
  -9  -2  -2   -0.04    0.22
  -9   2  -2   -0.11    0.23
   9   2   2   -0.33    0.26
  -9   2  -2    0.25    0.31
  -9   2  -2    0.03    0.19
   9   2   2   -0.21    0.27
  10  -2   2    0.83    0.45
 -10  -2  -2    0.51    0.33
  10  -2   2    0.98    0.38
 -10  -2  -2    0.12    0.28
 -10  -2  -2    0.92    0.42
 -10   2  -2    1.00    0.32
 -10   2  -2    0.95    0.39
 -10   2  -2    0.40    0.43
  10   2   2    0.72    0.38
  10   2   2    1.14    0.43
 -11  -2  -2    0.44    0.35
 -11  -2  -2    0.34    0.41
  11  -2   2    0.93    0.49
 -11  -2  -2    0.85    0.34
  11  -2   2    0.11    0.38
  11   2   2    0.34    0.42
 -11   2  -2    0.35    0.36
 -11   2  -2   -0.08    0.35
 -12  -3   2    0.53    0.35
  12  -3  -2    0.05    0.41
 -12  -3   2   -0.17    0.42
  12  -3  -2    0.10    0.41
 -12   3   2    0.49    0.46
  12   3  -2    0.33    0.49
  12   3  -2    0.65    0.46
  12   3  -2    0.63    0.51
  11  -3  -2    0.42    0.36
 -11  -3   2    0.14    0.28
  11  -3  -2   -0.29    0.35
 -11  -3   2    0.51    0.40
  11   3  -2    0.30    0.38
  11   3  -2   -0.03    0.37
 -11   3   2    0.25    0.33
 -11   3   2   -0.63    0.28
  10  -3  -2    0.51    0.38
 -10  -3   2    0.40    0.26
 -10  -3   2    0.21    0.29
  10  -3  -2    0.25    0.27
  10  -3  -2    0.45    0.29
 -10   3   2    0.36    0.23
 -10   3   2    0.24    0.30
  10   3  -2    0.77    0.39
  10   3  -2    1.51    0.49
 -10   3   2    0.30    0.31
  -9  -3   2    2.94    0.40
   9  -3  -2    2.90    0.44
  -9  -3   2    2.62    0.44
   9  -3  -2    2.41    0.44
   9  -3  -2    3.56    0.58
  -9   3   2    3.14    0.50
  -9   3   2    3.89    0.49
   9   3  -2    2.31    0.50
   9   3  -2    2.40    0.48
  -9   3   2    2.57    0.33
  -8  -3   2    0.98    0.20
   8  -3  -2    0.31    0.24
  -8  -3   2    0.60    0.28
  -8  -3   2    0.52    0.27
  -8  -3   2    0.87    0.25
   8  -3  -2    0.96    0.25
   8  -3  -2    0.90    0.35
   8   3  -2    0.33    0.23
  -8   3   2    0.46    0.19
  -8   3   2    0.46    0.21
   8   3  -2    0.17    0.25
   8   3  -2    0.31    0.32
  -8   3   2    0.70    0.29
  -7  -3   2   14.27    0.69
   7  -3  -2   13.10    0.70
  -7  -3   2   13.52    0.65
  -7  -3   2   14.26    0.53
  -7  -3   2   13.42    0.69
   7  -3  -2   15.42    0.80
   7  -3  -2   14.67    0.68
   7   3  -2   14.68    0.75
   7   3  -2   14.17    0.67
  -7   3   2   13.01    0.54
  -7   3   2   13.82    0.70
   7   3  -2   15.19    0.87
  -7   3   2   13.65    0.75
  -6  -3   2    5.28    0.41
   6  -3  -2    5.40    0.43
   6  -3  -2    5.82    0.46
   6  -3  -2    5.87    0.19
   6  -3  -2    6.85    0.42
  -6  -3   2    6.60    0.43
  -6  -3   2    6.19    0.31
  -6  -3   2    5.99    0.38
   6   3  -2    6.07    0.60
  -6   3   2    5.18    0.40
  -6   3   2    6.28    0.46
   6   3  -2    6.09    0.46
  -6   3   2    5.81    0.31
   6   3  -2    5.71    0.39
  -6   3   2    5.46    0.37
  -5  -3   2    3.04    0.30
   5  -3  -2    2.50    0.10
  -5  -3   2    2.79    0.31
  -5  -3   2    2.40    0.25
   5  -3  -2    2.49    0.32
   5  -3  -2    2.54    0.26
  -5  -3   2    2.45    0.19
   5  -3  -2    2.29    0.29
  -5   3   2    2.75    0.26
   5   3  -2    2.30    0.25
   5   3  -2    1.81    0.32
  -5   3   2    2.35    0.19
   5   3  -2    3.11    0.33
  -5   3   2    2.73    0.33
  -4  -3   2   10.38    0.45
  -4  -3   2   10.45    0.45
   4  -3  -2    9.33    0.48
  -4  -3   2   10.03    0.37
   4  -3  -2   10.85    0.43
   4  -3  -2   10.45    0.26
   4  -3  -2   10.33    0.47
   4   3  -2   10.10    0.54
  -4   3   2   10.16    0.50
   4   3  -2   10.66    0.44
   4   3  -2    9.73    0.44
  -4   3   2   10.71    0.41
  -3  -3   2    2.79    0.22
  -3  -3   2    2.72    0.18
   3  -3  -2    2.42    0.24
  -3  -3   2    2.53    0.24
   3  -3  -2    2.73    0.25
   3  -3  -2    2.79    0.11
   3  -3  -2    2.83    0.19
  -3   3   2    3.15    0.25
   3   3  -2    2.93    0.22
   3   3  -2    2.53    0.29
   3   3  -2    2.92    0.22
   2  -3  -2    0.88    0.09
  -2  -3   2    0.78    0.11
   2  -3  -2    0.87    0.14
   2  -3  -2    1.04    0.16
   2  -3  -2    1.04    0.08
  -2  -3   2    1.23    0.14
   2  -3  -2    0.99    0.10
  -2  -3   2    0.77    0.13
   2   3  -2    0.93    0.13
   2   3  -2    1.02    0.14
   2   3  -2    1.18    0.19
   2   3  -2    1.03    0.16
  -2   3   2    1.19    0.17
   1  -3  -2   85.68    1.92
  -1  -3   2   90.47    1.97
  -1  -3   2   87.08    1.97
  -1  -3   2   85.32    1.93
   1  -3  -2   87.92    1.98
   1  -3  -2   87.86    2.02
   1  -3  -2   88.29    1.98
   1   3  -2   84.97    1.95
   1   3  -2   84.03    2.04
  -1   3   2   86.62    1.98
   1   3  -2   82.44    1.97
   1   3  -2   88.07    1.94
   0  -3  -2   62.33    1.51
   0  -3   2   64.23    1.50
   0  -3   2   66.05    1.51
   0  -3  -2   65.55    1.56
   0  -3  -2   65.05    1.49
   0  -3  -2   64.40    1.49
   0   3  -2   64.69    1.46
   0   3  -2   65.48    1.53
   0   3  -2   65.49    1.53
   0   3  -2   64.66    1.49
   1  -3   2    3.91    0.22
  -1  -3  -2    3.89    0.15
   1  -3   2    4.04    0.24
  -1  -3  -2    3.85    0.19
  -1  -3  -2    3.81    0.20
  -1  -3  -2    3.77    0.20
   1  -3   2    3.82    0.21
  -1  -3  -2    3.57    0.16
  -1  -3  -2    3.43    0.21
  -1  -3  -2    3.51    0.20
  -1   3  -2    3.81    0.17
  -1   3  -2    4.08    0.25
   1   3   2    3.93    0.14
   1   3   2    3.40    0.20
   1   3   2    3.86    0.25
  -1   3  -2    3.75    0.20
  -1   3  -2    4.04    0.23
  -1   3  -2    3.97    0.21
  -2  -3  -2    3.33    0.22
   2  -3   2    3.35    0.23
  -2  -3  -2    3.40    0.20
  -2  -3  -2    3.55    0.22
   2  -3   2    3.36    0.26
  -2  -3  -2    3.42    0.20
   2  -3   2    3.47    0.25
  -2  -3  -2    3.40    0.21
  -2   3  -2    3.63    0.25
  -2   3  -2    3.62    0.23
   2   3   2    3.50    0.24
  -2   3  -2    3.43    0.29
  -2   3  -2    3.57    0.18
  -2   3  -2    3.18    0.22
   2   3   2    3.23    0.25
  -3  -3  -2    0.42    0.12
  -3  -3  -2    0.49    0.13
   3  -3   2    0.37    0.11
   3  -3   2    0.52    0.16
  -3  -3  -2    0.59    0.14
   3  -3   2    0.58    0.18
  -3  -3  -2    0.43    0.12
  -3  -3  -2    0.44    0.13
  -3   3  -2    0.47    0.14
  -3   3  -2    0.50    0.15
   3   3   2    0.54    0.16
  -3   3  -2    0.60    0.17
  -3   3  -2    0.61    0.11
   3   3   2    0.38    0.14
   3   3   2    0.38    0.10
   4  -3   2    5.77    0.42
  -4  -3  -2    6.91    0.40
  -4  -3  -2    6.43    0.20
   4  -3   2    6.99    0.37
  -4  -3  -2    7.38    0.37
   4  -3   2    6.88    0.41
  -4  -3  -2    7.39    0.36
  -4  -3  -2    6.64    0.37
  -4  -3  -2    6.59    0.35
   4   3   2    7.05    0.41
   4   3   2    6.34    0.42
  -4   3  -2    7.01    0.38
  -4   3  -2    6.81    0.41
  -4   3  -2    7.37    0.31
  -4   3  -2    6.45    0.37
   4   3   2    7.07    0.34
   5  -3   2    1.86    0.25
  -5  -3  -2    2.19    0.25
  -5  -3  -2    1.99    0.28
  -5  -3  -2    2.14    0.27
  -5  -3  -2    2.08    0.26
  -5  -3  -2    1.89    0.14
   5  -3   2    1.78    0.28
   5  -3   2    1.87    0.32
   5   3   2    1.92    0.31
  -5   3  -2    2.09    0.21
   5   3   2    2.03    0.29
  -5   3  -2    2.37    0.29
   5   3   2    2.02    0.24
  -5   3  -2    1.76    0.26
  -5   3  -2    2.18    0.32
  -6  -3  -2   25.55    0.97
   6  -3   2   25.84    0.91
   6  -3   2   23.72    0.98
  -6  -3  -2   24.64    0.68
  -6  -3  -2   24.66    0.85
  -6  -3  -2   24.86    0.88
   6  -3   2   26.45    1.08
  -6  -3  -2   25.16    0.92
   6   3   2   22.82    0.96
  -6   3  -2   25.02    1.01
   6   3   2   26.02    0.87
  -6   3  -2   24.34    0.78
  -6   3  -2   26.35    0.92
   6   3   2   25.19    1.02
  -6   3  -2   25.52    0.91
  -7  -3  -2    1.93    0.33
  -7  -3  -2    2.12    0.36
   7  -3   2    1.93    0.41
   7  -3   2    1.98    0.37
  -7  -3  -2    2.39    0.32
  -7  -3  -2    2.23    0.32
   7  -3   2    2.42    0.34
  -7  -3  -2    2.31    0.32
  -7   3  -2    1.95    0.26
  -7   3  -2    2.44    0.35
   7   3   2    1.85    0.39
   7   3   2    1.98    0.38
  -7   3  -2    1.55    0.35
  -7   3  -2    1.62    0.30
  -8  -3  -2    0.54    0.23
  -8  -3  -2    0.61    0.24
   8  -3   2    0.23    0.28
   8  -3   2    0.25    0.24
  -8  -3  -2    0.34    0.29
   8  -3   2    0.32    0.26
  -8  -3  -2    0.18    0.23
  -8   3  -2    0.47    0.25
  -8   3  -2    0.31    0.17
   8   3   2    0.27    0.28
   8   3   2    0.25    0.32
  -8   3  -2   -0.33    0.24
  -9  -3  -2    1.16    0.31
   9  -3   2    0.26    0.33
  -9  -3  -2    0.67    0.37
   9  -3   2   -0.02    0.28
  -9  -3  -2    0.14    0.22
  -9  -3  -2    0.75    0.30
  -9   3  -2    0.58    0.33
   9   3   2    0.31    0.37
   9   3   2    0.93    0.38
  -9   3  -2    0.77    0.24
  -9   3  -2    0.61    0.29
 -10  -3  -2    0.64    0.36
  10  -3   2    0.45    0.40
 -10  -3  -2   -0.06    0.28
  10  -3   2    0.51    0.41
 -10  -3  -2    0.47    0.31
 -10   3  -2    0.75    0.34
 -10   3  -2    0.63    0.37
  10   3   2    0.15    0.33
  10   3   2    0.46    0.43
 -10   3  -2    0.34    0.28
  11  -3   2    0.35    0.43
  11  -3   2    0.05    0.44
 -11  -3  -2    0.98    0.36
 -11  -3  -2    0.51    0.42
 -11  -3  -2    0.55    0.38
  11   3   2    0.49    0.44
 -11   3  -2    0.47    0.39
  11   3   2    0.27    0.42
 -11   3  -2    0.31    0.37
 -12  -4   2   -0.54    0.43
  12  -4  -2    0.32    0.48
  12  -4  -2    0.35    0.48
  12   4  -2   -0.06    0.36
 -12   4   2    0.15    0.44
  12   4  -2   -0.82    0.48
  11  -4  -2    4.15    0.66
  11  -4  -2    1.81    0.47
  11  -4  -2    3.18    0.59
 -11  -4   2    3.50    0.57
 -11  -4   2    2.26    0.44
 -11   4   2    3.04    0.61
 -11   4   2    2.40    0.52
  11   4  -2    2.68    0.59
  11   4  -2    3.57    0.71
  10  -4  -2    2.86    0.56
 -10  -4   2    3.09    0.46
  10  -4  -2    3.44    0.49
  10  -4  -2    5.26    0.66
 -10  -4   2    2.35    0.51
 -10   4   2    3.79    0.58
 -10   4   2    2.69    0.50
  10   4  -2    2.87    0.55
  10   4  -2    3.42    0.66
  -9  -4   2   -0.09    0.21
  -9  -4   2    0.15    0.30
   9  -4  -2    0.20    0.28
   9  -4  -2    0.00    0.29
   9  -4  -2   -0.05    0.21
   9   4  -2   -0.57    0.30
  -9   4   2    0.28    0.26
  -9   4   2   -0.24    0.17
   9   4  -2    0.39    0.28
  -9   4   2    0.02    0.28
   8  -4  -2    0.55    0.33
   8  -4  -2    0.55    0.23
  -8  -4   2    0.57    0.22
   8  -4  -2    0.21    0.24
  -8  -4   2    0.65    0.20
  -8  -4   2    0.81    0.28
  -8  -4   2    0.35    0.25
   8   4  -2    0.59    0.23
   8   4  -2    0.23    0.29
  -8   4   2    0.37    0.27
   8   4  -2    0.24    0.29
  -8   4   2    0.81    0.19
  -8   4   2    0.86    0.31
  -7  -4   2    0.81    0.25
   7  -4  -2    0.62    0.24
  -7  -4   2    0.83    0.18
  -7  -4   2    1.42    0.28
   7  -4  -2    1.03    0.32
  -7  -4   2    0.76    0.23
   7  -4  -2    0.66    0.20
  -7   4   2    0.79    0.24
  -7   4   2    0.71    0.16
   7   4  -2    0.53    0.33
   7   4  -2    0.79    0.22
  -7   4   2    0.62    0.26
   7   4  -2    0.40    0.25
  -6  -4   2    0.51    0.16
  -6  -4   2    0.11    0.13
  -6  -4   2    0.55    0.20
   6  -4  -2    0.28    0.06
   6  -4  -2    0.61    0.23
  -6  -4   2    0.22    0.16
   6  -4  -2    0.12    0.14
   6  -4  -2    0.32    0.20
   6   4  -2    0.18    0.19
   6   4  -2    0.19    0.24
   6   4  -2    0.49    0.16
  -6   4   2    0.32    0.19
  -6   4   2    0.37    0.20
  -6   4   2    0.40    0.12
   5  -4  -2    2.78    0.27
  -5  -4   2    2.68    0.29
  -5  -4   2    2.81    0.23
  -5  -4   2    3.05    0.31
   5  -4  -2    3.33    0.38
  -5  -4   2    3.40    0.27
   5  -4  -2    2.72    0.13
   5  -4  -2    3.20    0.33
   5   4  -2    2.82    0.38
  -5   4   2    3.41    0.35
   5   4  -2    2.82    0.31
   5   4  -2    3.65    0.28
  -5   4   2    2.89    0.19
  -5   4   2    3.14    0.35
   4  -4  -2    4.54    0.35
   4  -4  -2    4.59    0.16
   4  -4  -2    3.99    0.31
  -4  -4   2    3.93    0.30
   4  -4  -2    4.32    0.28
  -4  -4   2    4.00    0.28
  -4  -4   2    4.50    0.30
   4   4  -2    4.20    0.30
  -4   4   2    4.68    0.35
   4   4  -2    4.33    0.29
   4   4  -2    4.60    0.39
   3  -4  -2    0.30    0.14
   3  -4  -2    0.34    0.10
  -3  -4   2    0.23    0.12
  -3  -4   2    0.65    0.14
  -3  -4   2    0.28    0.10
   3  -4  -2    0.23    0.13
   3  -4  -2    0.44    0.07
   3   4  -2    0.29    0.13
   3   4  -2    0.26    0.12
   3   4  -2    0.30    0.12
   3   4  -2    0.39    0.18
  -3   4   2    0.47    0.15
   2  -4  -2    4.34    0.26
   2  -4  -2    4.19    0.18
  -2  -4   2    3.94    0.23
   2  -4  -2    4.46    0.20
   2  -4  -2    4.40    0.19
  -2  -4   2    4.74    0.27
  -2  -4   2    4.25    0.21
  -2  -4   2    4.43    0.23
   2   4  -2    4.28    0.28
   2   4  -2    4.64    0.24
   2   4  -2    4.58    0.26
  -2   4   2    4.64    0.27
   2   4  -2    4.28    0.32
  -1  -4   2   74.79    1.75
  -1  -4   2   73.74    1.74
   1  -4  -2   74.71    1.58
   1  -4  -2   75.75    1.75
   1  -4  -2   75.13    1.77
  -1  -4   2   72.79    1.71
   1  -4  -2   73.44    1.58
   1   4  -2   73.27    1.71
   1   4  -2   74.18    1.67
   1   4  -2   72.86    1.83
   1   4  -2   76.03    1.76
  -1   4   2   74.89    1.73
   0  -4  -2    2.30    0.16
   0  -4  -2    2.18    0.14
   0  -4  -2    2.13    0.16
   0  -4  -2    2.30    0.19
   0  -4   2    2.04    0.18
   0  -4   2    1.78    0.17
   0  -4   2    2.54    0.18
   0   4  -2    1.94    0.13
   0   4   2    2.26    0.16
   0   4  -2    2.44    0.24
   0   4  -2    2.40    0.17
   0   4  -2    2.34    0.16
   0   4  -2    2.71    0.23
   1  -4   2   10.07    0.38
   1  -4   2   10.13    0.40
  -1  -4  -2   10.25    0.36
  -1  -4  -2    9.98    0.31
  -1  -4  -2   10.28    0.33
  -1  -4  -2   10.00    0.40
  -1  -4  -2    9.45    0.37
   1  -4   2    9.43    0.38
  -1  -4  -2   10.44    0.30
  -1   4  -2   11.11    0.38
   1   4   2    9.43    0.39
  -1   4  -2   10.49    0.37
   1   4   2   10.45    0.31
  -1   4  -2   10.04    0.34
  -1   4  -2    9.54    0.41
  -2  -4  -2    9.28    0.37
   2  -4   2    9.24    0.44
  -2  -4  -2   10.60    0.40
  -2  -4  -2    9.37    0.37
   2  -4   2    9.91    0.42
  -2  -4  -2    9.43    0.35
  -2  -4  -2    9.20    0.35
   2  -4   2    9.19    0.38
  -2   4  -2    9.22    0.31
  -2   4  -2    9.72    0.38
  -2   4  -2    9.03    0.37
   2   4   2    9.49    0.44
   2   4   2    9.34    0.23
  -2   4  -2    9.74    0.41
   2   4   2    9.58    0.42
  -2   4  -2    8.42    0.41
  -3  -4  -2   15.22    0.53
  -3  -4  -2   15.02    0.55
  -3  -4  -2   15.22    0.54
   3  -4   2   13.78    0.58
  -3  -4  -2   15.17    0.54
  -3  -4  -2   15.89    0.52
   3  -4   2   12.83    0.60
   3   4   2   15.41    0.49
   3   4   2   16.13    0.61
  -3   4  -2   15.99    0.61
  -3   4  -2   15.02    0.47
  -3   4  -2   16.16    0.61
   3   4   2   15.10    0.61
  -3   4  -2   15.35    0.55
   4  -4   2    6.49    0.43
   4  -4   2    6.26    0.37
  -4  -4  -2    7.07    0.39
  -4  -4  -2    6.31    0.36
   4  -4   2    6.77    0.42
  -4  -4  -2    6.65    0.36
  -4  -4  -2    6.44    0.34
  -4  -4  -2    6.06    0.36
   4   4   2    6.85    0.43
  -4   4  -2    6.27    0.36
   4   4   2    6.28    0.33
  -4   4  -2    6.55    0.30
  -4   4  -2    6.49    0.41
  -4   4  -2    6.20    0.38
   4   4   2    6.85    0.45
   5  -4   2    0.49    0.15
   5  -4   2    0.68    0.21
  -5  -4  -2    0.55    0.17
  -5  -4  -2    0.56    0.17
   5  -4   2    0.36    0.19
  -5  -4  -2    0.59    0.21
  -5  -4  -2    0.42    0.17
  -5  -4  -2    0.59    0.18
   5   4   2    0.67    0.24
   5   4   2    0.56    0.15
  -5   4  -2    0.58    0.20
  -5   4  -2    0.51    0.12
  -5   4  -2    0.93    0.20
   5   4   2    0.44    0.21
  -5   4  -2    0.63    0.19
  -6  -4  -2   24.61    0.91
  -6  -4  -2   25.39    0.87
   6  -4   2   25.49    1.02
   6  -4   2   24.57    0.90
  -6  -4  -2   23.71    0.61
   6  -4   2   25.80    1.06
  -6  -4  -2   23.89    0.94
  -6  -4  -2   24.11    0.88
  -6  -4  -2   23.76    0.87
   6   4   2   24.04    0.85
  -6   4  -2   24.41    0.90
  -6   4  -2   24.80    1.01
   6   4   2   23.91    1.02
   6   4   2   25.04    1.01
  -6   4  -2   24.54    0.92
  -6   4  -2   25.04    0.77
  -7  -4  -2    1.19    0.26
  -7  -4  -2    1.90    0.33
  -7  -4  -2    1.21    0.28
   7  -4   2    0.85    0.31
  -7  -4  -2    0.79    0.29
  -7  -4  -2    1.07    0.25
   7  -4   2    0.87    0.25
   7  -4   2    0.97    0.31
  -7   4  -2    1.32    0.22
  -7   4  -2    0.94    0.25
   7   4   2    0.69    0.30
  -7   4  -2    0.91    0.26
   7   4   2    0.47    0.28
  -7   4  -2    0.86    0.30
  -8  -4  -2    0.64    0.24
   8  -4   2    1.03    0.37
  -8  -4  -2    0.77    0.27
   8  -4   2    0.58    0.29
  -8  -4  -2    0.55    0.26
   8  -4   2    0.65    0.25
  -8  -4  -2    0.61    0.27
  -8  -4  -2    0.06    0.26
   8   4   2    0.49    0.33
   8   4   2    0.59    0.33
  -8   4  -2    0.26    0.33
  -8   4  -2    0.49    0.21
  -8   4  -2    0.44    0.28
   9  -4   2    0.67    0.39
   9  -4   2    0.39    0.30
  -9  -4  -2    0.26    0.29
  -9  -4  -2   -0.09    0.23
  -9  -4  -2    0.30    0.24
  -9  -4  -2    0.23    0.22
  -9   4  -2    0.17    0.21
  -9   4  -2    0.26    0.23
   9   4   2    0.01    0.32
   9   4   2    0.20    0.37
  -9   4  -2    0.23    0.29
  10  -4   2    0.66    0.41
 -10  -4  -2    0.41    0.41
 -10  -4  -2    0.59    0.34
  10  -4   2    1.01    0.45
 -10  -4  -2    0.58    0.37
  10   4   2    1.00    0.43
  10   4   2    1.73    0.48
 -10   4  -2    1.04    0.43
 -10   4  -2    0.86    0.36
 -11  -4  -2    2.01    0.47
 -11  -4  -2    2.91    0.56
 -11  -4  -2    2.69    0.63
  11  -4   2    4.85    0.70
  11  -4   2    3.19    0.69
  11   4   2    2.71    0.59
 -11   4  -2    2.52    0.54
  11   4   2    2.30    0.57
 -11   4  -2    1.77    0.57
  11  -5  -2   -0.24    0.41
  11  -5  -2   -0.40    0.40
 -11  -5   2    0.16    0.36
 -11  -5   2    0.31    0.30
  11  -5  -2   -0.19    0.33
  11   5  -2    0.25    0.35
  11   5  -2    0.22    0.48
 -11   5   2    0.01    0.39
 -11   5   2    0.56    0.44
 -10  -5   2    0.33    0.26
  10  -5  -2   -0.23    0.27
 -10  -5   2    0.13    0.30
  10  -5  -2    0.39    0.38
  10  -5  -2   -0.01    0.30
  10   5  -2    0.19    0.38
 -10   5   2   -0.04    0.31
 -10   5   2    0.13    0.30
  10   5  -2    0.07    0.37
   9  -5  -2    0.91    0.28
   9  -5  -2    0.70    0.32
  -9  -5   2    0.95    0.34
  -9  -5   2    0.85    0.29
   9  -5  -2    0.28    0.36
  -9   5   2    1.31    0.37
   9   5  -2    0.34    0.37
  -9   5   2    0.76    0.32
   9   5  -2    0.70    0.37
   8  -5  -2   12.10    0.76
   8  -5  -2   13.02    0.81
  -8  -5   2   14.01    0.75
  -8  -5   2   13.17    0.59
  -8  -5   2   11.75    0.71
   8  -5  -2   13.03    0.71
  -8  -5   2   12.45    0.67
  -8   5   2   12.35    0.80
   8   5  -2   12.75    0.76
  -8   5   2   11.79    0.71
  -8   5   2   12.78    0.54
   8   5  -2   10.87    0.83
  -7  -5   2    4.07    0.33
  -7  -5   2    4.64    0.46
   7  -5  -2    4.62    0.52
  -7  -5   2    3.57    0.41
   7  -5  -2    3.61    0.40
   7  -5  -2    4.71    0.52
  -7  -5   2    4.08    0.46
  -7   5   2    4.09    0.47
   7   5  -2    4.26    0.41
  -7   5   2    4.41    0.53
   7   5  -2    4.30    0.56
   7   5  -2    3.84    0.46
  -7   5   2    4.14    0.28
  -6  -5   2    0.32    0.17
  -6  -5   2    0.39    0.20
   6  -5  -2    0.35    0.24
   6  -5  -2    0.16    0.06
  -6  -5   2    0.11    0.15
   6  -5  -2    0.14    0.20
   6  -5  -2    0.05    0.13
  -6  -5   2    0.35    0.14
  -6   5   2    0.11    0.09
  -6   5   2    0.03    0.16
   6   5  -2    0.38    0.17
  -6   5   2    0.24    0.19
   6   5  -2    0.26    0.18
   6   5  -2    0.16    0.25
  -5  -5   2    0.05    0.14
   5  -5  -2    0.15    0.12
   5  -5  -2    0.12    0.16
  -5  -5   2    0.10    0.12
  -5  -5   2    0.11    0.12
   5  -5  -2   -0.07    0.16
   5  -5  -2    0.23    0.07
  -5  -5   2    0.32    0.12
   5   5  -2    0.12    0.14
  -5   5   2    0.20    0.16
  -5   5   2    0.33    0.18
   5   5  -2   -0.10    0.17
  -5   5   2    0.09    0.08
   5   5  -2    0.14    0.11
   4  -5  -2    1.50    0.19
  -4  -5   2    1.04    0.19
   4  -5  -2    1.76    0.26
  -4  -5   2    1.68    0.21
  -4  -5   2    1.69    0.20
  -4  -5   2    1.58    0.20
   4  -5  -2    1.21    0.24
   4  -5  -2    1.47    0.12
  -4   5   2    1.14    0.23
   4   5  -2    1.70    0.21
  -4   5   2    1.34    0.23
   4   5  -2    1.47    0.28
   4   5  -2    1.71    0.24
   3  -5  -2    4.60    0.25
   3  -5  -2    4.39    0.33
  -3  -5   2    4.71    0.25
   3  -5  -2    4.35    0.20
  -3  -5   2    3.96    0.29
  -3  -5   2    4.19    0.26
   3  -5  -2    3.99    0.30
   3   5  -2    4.71    0.37
   3   5  -2    4.70    0.28
  -3   5   2    4.42    0.30
  -3   5   2    4.60    0.33
   3   5  -2    4.66    0.30
   3   5  -2    4.95    0.30
  -2  -5   2    1.28    0.13
   2  -5  -2    0.87    0.11
   2  -5  -2    1.20    0.12
  -2  -5   2    1.05    0.15
   2  -5  -2    1.09    0.12
   2  -5  -2    1.03    0.17
  -2  -5   2    1.17    0.16
  -2  -5   2    1.42    0.18
   2   5  -2    1.69    0.22
   2   5  -2    1.41    0.23
  -2   5   2    1.00    0.15
  -2   5   2    1.19    0.19
   2   5  -2    1.02    0.14
  -1  -5   2   19.46    0.59
  -1  -5   2   18.95    0.61
   1  -5  -2   19.43    0.47
   1  -5  -2   19.67    0.47
   1  -5  -2   19.86    0.64
   1  -5  -2   19.50    0.56
  -1  -5   2   19.10    0.61
   1  -5  -2   20.32    0.55
   1   5  -2   20.06    0.65
   1   5  -2   20.28    0.58
   1   5  -2   20.32    0.69
  -1   5   2   18.76    0.62
  -1   5   2   19.92    0.58
   1   5  -2   20.11    0.50
   0  -5  -2    1.87    0.18
   0  -5  -2    1.48    0.18
   0  -5  -2    1.67    0.10
   0  -5  -2    1.86    0.13
   0  -5  -2    1.65    0.09
   0  -5   2    1.60    0.18
   0  -5   2    1.57    0.18
   0   5  -2    1.91    0.15
   0   5  -2    1.68    0.20
   0   5  -2    1.72    0.12
   0   5  -2    1.99    0.17
   0   5   2    1.65    0.16
   0   5  -2    1.99    0.23
  -1  -5  -2    1.39    0.16
  -1  -5  -2    1.51    0.13
  -1  -5  -2    1.48    0.11
  -1  -5  -2    1.51    0.14
  -1  -5  -2    1.12    0.17
   1  -5   2    1.28    0.18
  -1  -5  -2    1.27    0.16
   1  -5   2    1.82    0.20
   1  -5   2    1.02    0.18
  -1   5  -2    1.54    0.15
   1   5   2    1.50    0.21
  -1   5  -2    1.82    0.24
   1   5   2    1.56    0.14
  -1   5  -2    1.49    0.17
  -1   5  -2    1.29    0.16
   2  -5   2    7.06    0.38
  -2  -5  -2    7.69    0.35
  -2  -5  -2    7.16    0.31
   2  -5   2    7.02    0.35
   2  -5   2    6.98    0.39
  -2  -5  -2    7.23    0.33
  -2  -5  -2    6.46    0.30
  -2  -5  -2    7.10    0.29
  -2   5  -2    6.96    0.34
  -2   5  -2    7.24    0.33
   2   5   2    6.69    0.23
   2   5   2    7.01    0.41
   2   5   2    7.33    0.39
  -2   5  -2    7.34    0.41
  -2   5  -2    7.27    0.36
   3  -5   2    1.68    0.22
  -3  -5  -2    1.40    0.19
   3  -5   2    1.30    0.24
  -3  -5  -2    1.07    0.19
  -3  -5  -2    1.71    0.21
   3  -5   2    1.25    0.21
  -3  -5  -2    1.41    0.18
  -3  -5  -2    0.94    0.15
  -3   5  -2    1.02    0.20
  -3   5  -2    1.37    0.23
  -3   5  -2    1.33    0.13
   3   5   2    1.11    0.22
   3   5   2    1.33    0.23
  -3   5  -2    1.47    0.19
   4  -5   2   24.32    0.89
  -4  -5  -2   24.43    0.80
  -4  -5  -2   24.60    0.80
  -4  -5  -2   24.57    0.81
  -4  -5  -2   24.16    0.76
   4  -5   2   23.19    0.91
  -4  -5  -2   25.32    0.82
  -4   5  -2   24.33    0.69
   4   5   2   23.99    0.73
  -4   5  -2   24.85    0.88
  -4   5  -2   24.79    0.88
   4   5   2   25.02    0.90
   4   5   2   23.58    0.89
  -4   5  -2   24.48    0.80
   5  -5   2    1.47    0.28
  -5  -5  -2    0.90    0.18
   5  -5   2    0.52    0.23
  -5  -5  -2    1.12    0.22
  -5  -5  -2    1.26    0.23
  -5  -5  -2    1.25    0.22
  -5  -5  -2    1.07    0.21
   5  -5   2    1.23    0.22
   5   5   2    1.00    0.25
  -5   5  -2    0.64    0.22
   5   5   2    1.06    0.19
  -5   5  -2    1.12    0.26
   5   5   2    0.77    0.26
  -5   5  -2    1.32    0.17
  -5   5  -2    1.17    0.23
  -6  -5  -2    3.99    0.39
   6  -5   2    2.92    0.45
  -6  -5  -2    4.02    0.42
  -6  -5  -2    2.89    0.36
  -6  -5  -2    3.42    0.36
  -6  -5  -2    3.95    0.37
   6  -5   2    2.98    0.40
   6  -5   2    4.05    0.41
  -6   5  -2    3.53    0.37
  -6   5  -2    3.44    0.41
  -6   5  -2    3.60    0.44
   6   5   2    3.88    0.48
   6   5   2    3.47    0.45
   7  -5   2    3.36    0.49
  -7  -5  -2    3.53    0.42
  -7  -5  -2    3.15    0.43
   7  -5   2    3.78    0.53
   7  -5   2    3.65    0.42
  -7  -5  -2    3.95    0.41
  -7  -5  -2    2.85    0.38
  -7  -5  -2    3.94    0.41
  -7   5  -2    3.64    0.44
  -7   5  -2    2.87    0.45
   7   5   2    3.08    0.47
   7   5   2    3.62    0.50
  -8  -5  -2    3.56    0.44
   8  -5   2    3.75    0.52
   8  -5   2    3.34    0.44
  -8  -5  -2    3.94    0.44
  -8  -5  -2    3.77    0.47
   8  -5   2    3.88    0.58
  -8  -5  -2    4.24    0.53
  -8  -5  -2    4.11    0.44
  -8   5  -2    3.93    0.56
  -8   5  -2    4.24    0.50
   8   5   2    2.90    0.50
   8   5   2    3.91    0.56
   9  -5   2    0.10    0.25
  -9  -5  -2   -0.19    0.26
  -9  -5  -2    0.17    0.22
  -9  -5  -2   -0.33    0.29
   9  -5   2   -0.29    0.29
   9  -5   2    0.02    0.28
  -9  -5  -2   -0.05    0.25
   9   5   2   -0.01    0.30
  -9   5  -2    0.56    0.29
   9   5   2    0.12    0.31
  -9   5  -2    0.08    0.28
 -10  -5  -2    0.46    0.33
  10  -5   2    0.88    0.40
 -10  -5  -2    0.74    0.35
 -10  -5  -2    0.96    0.44
  10  -5   2    0.78    0.42
 -10   5  -2    0.70    0.43
  10   5   2    1.42    0.48
 -10   5  -2    0.71    0.35
  10   5   2    0.71    0.39
 -10   5  -2    0.62    0.37
  11  -5   2    1.25    0.47
 -11  -5  -2    0.60    0.40
  11  -5   2    0.66    0.45
 -11  -5  -2    1.01    0.53
 -11  -5  -2    0.80    0.42
 -11   5  -2    1.17    0.46
  11   5   2    1.52    0.54
  11   5   2    0.87    0.51
 -11   5  -2    0.50    0.45
 -11  -6   2   -0.06    0.38
  11  -6  -2    0.50    0.45
  11  -6  -2   -0.02    0.38
  11  -6  -2   -0.30    0.30
 -11  -6   2    0.43    0.33
 -11   6   2   -0.40    0.36
  11   6  -2   -0.44    0.36
 -11   6   2   -0.39    0.36
  11   6  -2    0.21    0.46
 -10  -6   2    3.92    0.55
 -10  -6   2    4.95    0.62
  10  -6  -2    4.18    0.63
  10  -6  -2    4.55    0.57
  10  -6  -2    4.22    0.65
 -10   6   2    3.03    0.59
  10   6  -2    2.48    0.52
 -10   6   2    3.47    0.54
  10   6  -2    4.16    0.76
  -9  -6   2   -0.08    0.27
  -9  -6   2    0.04    0.23
   9  -6  -2   -0.10    0.24
   9  -6  -2   -0.12    0.27
   9  -6  -2    0.36    0.35
  -9   6   2    0.07    0.29
   9   6  -2    0.14    0.39
  -9   6   2    0.19    0.29
   9   6  -2    0.50    0.34
  -8  -6   2   11.49    0.69
  -8  -6   2   11.12    0.56
   8  -6  -2   10.65    0.73
  -8  -6   2   13.04    0.74
  -8  -6   2    9.92    0.63
   8  -6  -2   11.08    0.66
   8  -6  -2   11.81    0.79
  -8   6   2    9.96    0.72
  -8   6   2   11.58    0.72
   8   6  -2   10.52    0.70
   8   6  -2   10.74    0.82
   7  -6  -2    4.02    0.50
  -7  -6   2    3.82    0.36
  -7  -6   2    4.52    0.47
  -7  -6   2    4.25    0.44
  -7  -6   2    3.59    0.41
   7  -6  -2    2.98    0.37
   7  -6  -2    4.42    0.53
   7   6  -2    3.15    0.44
   7   6  -2    4.30    0.59
  -7   6   2    3.41    0.25
  -7   6   2    3.59    0.46
   7   6  -2    3.65    0.39
  -7   6   2    2.92    0.44
   6  -6  -2    0.40    0.16
   6  -6  -2    0.55    0.22
  -6  -6   2    0.35    0.17
  -6  -6   2    0.48    0.16
   6  -6  -2    0.42    0.09
  -6  -6   2    0.49    0.17
   6  -6  -2    0.23    0.24
  -6  -6   2   -0.03    0.17
  -6   6   2    0.47    0.12
   6   6  -2    0.53    0.22
   6   6  -2    0.05    0.23
  -6   6   2    0.36    0.20
   6   6  -2    0.34    0.16
  -6   6   2    0.15    0.19
  -5  -6   2    0.63    0.16
  -5  -6   2    0.50    0.17
   5  -6  -2    0.68    0.16
  -5  -6   2    0.41    0.17
  -5  -6   2    0.73    0.17
   5  -6  -2    0.53    0.20
   5  -6  -2    0.48    0.09
   5  -6  -2    0.72    0.24
  -5   6   2    0.63    0.21
  -5   6   2    0.58    0.21
   5   6  -2    0.47    0.14
   5   6  -2    0.49    0.25
  -5   6   2    0.70    0.10
   5   6  -2    0.76    0.22
  -4  -6   2    1.28    0.18
  -4  -6   2    1.38    0.21
  -4  -6   2    1.40    0.22
   4  -6  -2    1.06    0.17
   4  -6  -2    1.48    0.26
   4  -6  -2    1.72    0.21
   4  -6  -2    1.22    0.13
   4  -6  -2    1.13    0.24
  -4  -6   2    1.07    0.18
  -4   6   2    1.23    0.25
   4   6  -2    0.98    0.25
   4   6  -2    1.24    0.22
  -4   6   2    1.39    0.24
   4   6  -2    1.47    0.20
  -3  -6   2   49.67    1.20
   3  -6  -2   47.51    1.21
  -3  -6   2   46.68    1.31
  -3  -6   2   48.49    1.29
  -3  -6   2   48.76    1.28
   3  -6  -2   49.68    1.18
   3  -6  -2   48.11    1.37
  -3   6   2   48.75    1.34
   3   6  -2   46.89    1.33
  -3   6   2   50.54    1.39
   3   6  -2   50.15    1.27
   3   6  -2   50.63    1.49
   3   6  -2   49.15    1.30
  -2  -6   2    7.20    0.38
  -2  -6   2    7.12    0.25
   2  -6  -2    7.05    0.30
   2  -6  -2    6.90    0.38
  -2  -6   2    6.74    0.35
   2  -6  -2    7.67    0.29
  -2  -6   2    6.85    0.34
   2  -6  -2    6.90    0.27
  -2   6   2    7.30    0.35
   2   6  -2    7.41    0.39
   2   6  -2    7.79    0.33
   2   6  -2    6.99    0.43
  -2   6   2    7.10    0.39
   1  -6  -2   78.17    1.82
   1  -6  -2   77.19    1.91
   1  -6  -2   78.34    1.71
   1  -6  -2   75.08    1.71
  -1  -6   2   76.88    1.86
  -1  -6   2   76.14    1.87
  -1  -6   2   75.78    1.87
   1  -6  -2   78.92    1.84
  -1   6   2   78.73    1.81
   1   6  -2   79.35    1.99
  -1   6   2   76.24    1.85
   1   6  -2   75.97    1.88
   1   6  -2   78.24    1.82
   1   6  -2   77.25    1.72
   0  -6  -2    6.34    0.24
   0  -6  -2    6.37    0.21
   0  -6   2    6.74    0.34
   0  -6  -2    6.14    0.26
   0  -6  -2    6.13    0.23
   0  -6   2    6.38    0.32
   0  -6  -2    6.53    0.34
   0  -6   2    5.97    0.32
   0   6  -2    6.07    0.25
   0   6  -2    6.32    0.24
   0   6   2    6.46    0.37
   0   6  -2    6.84    0.30
   0   6  -2    5.92    0.36
   0   6   2    5.89    0.29
   0   6  -2    7.00    0.37
  -1  -6  -2    1.53    0.22
   1  -6   2    1.00    0.17
  -1  -6  -2    1.12    0.11
   1  -6   2    1.24    0.20
  -1  -6  -2    1.28    0.14
  -1  -6  -2    1.29    0.12
   1  -6   2    1.07    0.17
  -1  -6  -2    1.25    0.17
  -1  -6  -2    1.09    0.14
  -1   6  -2    1.27    0.17
  -1   6  -2    1.62    0.23
   1   6   2    1.32    0.16
  -1   6  -2    1.25    0.17
   1   6   2    1.05    0.20
  -1   6  -2    1.27    0.22
  -1   6  -2    1.27    0.14
   2  -6   2    6.77    0.39
   2  -6   2    5.65    0.37
  -2  -6  -2    6.61    0.35
  -2  -6  -2    6.78    0.34
   2  -6   2    6.02    0.34
  -2  -6  -2    6.55    0.27
  -2  -6  -2    7.06    0.32
  -2  -6  -2    6.34    0.29
   2   6   2    6.22    0.41
  -2   6  -2    6.81    0.35
   2   6   2    6.25    0.39
  -2   6  -2    7.05    0.34
   2   6   2    6.84    0.26
  -2   6  -2    6.82    0.40
  -2   6  -2    6.92    0.33
   3  -6   2   14.89    0.62
   3  -6   2   15.28    0.58
  -3  -6  -2   14.13    0.49
  -3  -6  -2   14.74    0.54
  -3  -6  -2   15.50    0.57
  -3  -6  -2   14.39    0.56
   3  -6   2   14.64    0.65
  -3  -6  -2   14.38    0.53
   3   6   2   14.71    0.65
   3   6   2   14.19    0.64
   3   6   2   13.49    0.37
  -3   6  -2   15.22    0.61
  -3   6  -2   15.59    0.56
  -3   6  -2   14.60    0.42
  -3   6  -2   14.62    0.63
  -4  -6  -2   10.19    0.43
  -4  -6  -2   10.55    0.49
   4  -6   2   10.92    0.56
   4  -6   2   11.46    0.52
  -4  -6  -2   10.45    0.49
   4  -6   2   10.10    0.57
  -4  -6  -2   10.65    0.49
  -4  -6  -2    9.97    0.47
  -4   6  -2   10.01    0.36
   4   6   2   10.61    0.57
  -4   6  -2   10.21    0.48
  -4   6  -2   10.55    0.56
   4   6   2   10.49    0.56
  -4   6  -2   10.45    0.54
  -5  -6  -2    0.15    0.16
  -5  -6  -2    0.08    0.14
   5  -6   2    0.50    0.22
  -5  -6  -2    0.39    0.18
   5  -6   2    0.37    0.22
  -5  -6  -2    0.40    0.14
   5  -6   2    0.66    0.19
  -5  -6  -2    0.16    0.16
  -5   6  -2    0.45    0.20
  -5   6  -2    0.29    0.19
  -5   6  -2    0.57    0.18
   5   6   2    0.58    0.15
   5   6   2    0.40    0.23
  -5   6  -2    0.44    0.12
   5   6   2    0.41    0.23
  -6  -6  -2    7.63    0.48
   6  -6   2    6.85    0.66
   6  -6   2    7.03    0.54
  -6  -6  -2    7.49    0.49
  -6  -6  -2    6.83    0.43
   6  -6   2    6.53    0.48
  -6  -6  -2    7.55    0.48
  -6  -6  -2    7.67    0.50
  -6   6  -2    7.16    0.54
  -6   6  -2    7.17    0.37
   6   6   2    7.58    0.58
   6   6   2    8.43    0.63
  -6   6  -2    7.07    0.49
  -6   6  -2    7.43    0.55
  -7  -6  -2    4.65    0.48
   7  -6   2    5.15    0.52
  -7  -6  -2    3.18    0.38
   7  -6   2    4.02    0.53
  -7  -6  -2    3.96    0.45
  -7  -6  -2    4.76    0.46
  -7  -6  -2    4.71    0.51
   7  -6   2    4.11    0.56
   7   6   2    4.31    0.56
   7   6   2    4.06    0.53
  -7   6  -2    4.23    0.34
  -7   6  -2    3.60    0.47
  -7   6  -2    4.13    0.54
   8  -6   2    0.25    0.28
  -8  -6  -2    0.55    0.28
  -8  -6  -2    0.21    0.22
  -8  -6  -2    0.49    0.25
   8  -6   2   -0.21    0.30
  -8  -6  -2   -0.09    0.20
  -8  -6  -2    0.26    0.26
   8  -6   2    0.07    0.24
   8   6   2    0.14    0.30
  -8   6  -2    0.26    0.33
   8   6   2    0.27    0.33
  -8   6  -2   -0.18    0.26
  -9  -6  -2    0.33    0.24
   9  -6   2    0.39    0.36
  -9  -6  -2    0.24    0.24
  -9  -6  -2    0.34    0.33
   9  -6   2    0.59    0.37
  -9  -6  -2    0.10    0.23
  -9  -6  -2    0.82    0.34
   9  -6   2   -0.05    0.27
   9   6   2    0.15    0.34
  -9   6  -2   -0.10    0.28
   9   6   2    0.14    0.36
  -9   6  -2    0.21    0.30
 -10  -6  -2    1.78    0.42
  10  -6   2    2.06    0.55
  10  -6   2    2.96    0.58
 -10  -6  -2    1.57    0.49
 -10  -6  -2    1.81    0.44
 -10   6  -2    2.32    0.60
  10   6   2    1.41    0.49
 -10   6  -2    1.36    0.44
  10   6   2    2.26    0.57
 -10   6  -2    2.72    0.52
 -11  -6  -2   -0.25    0.35
 -11  -6  -2   -0.18    0.40
  11  -6   2    0.32    0.45
  11  -6   2   -0.39    0.37
 -11  -6  -2    0.01    0.34
 -11   6  -2   -0.07    0.38
  11   6   2    0.14    0.40
  11   6   2    0.15    0.39
 -11   6  -2   -0.18    0.45
 -11  -7   2    0.72    0.34
  11  -7  -2    0.39    0.39
  11  -7  -2   -0.04    0.35
  11  -7  -2    0.71    0.49
 -11  -7   2    0.71    0.41
  11   7  -2   -0.07    0.42
  11   7  -2    0.42    0.50
 -11   7   2    1.23    0.47
 -11   7   2    0.29    0.42
  10  -7  -2    2.05    0.55
 -10  -7   2    2.80    0.51
  10  -7  -2    2.09    0.51
 -10  -7   2    2.96    0.49
  10  -7  -2    2.39    0.49
 -10   7   2    1.73    0.49
  10   7  -2    3.00    0.56
 -10   7   2    2.27    0.49
  10   7  -2    2.82    0.65
   9  -7  -2    1.46    0.45
   9  -7  -2    2.86    0.53
  -9  -7   2    2.86    0.47
   9  -7  -2    2.72    0.43
  -9  -7   2    2.76    0.44
   9   7  -2    2.37    0.54
  -9   7   2    3.18    0.53
   9   7  -2    1.48    0.45
  -9   7   2    2.31    0.50
  -8  -7   2    0.23    0.23
  -8  -7   2   -0.01    0.20
  -8  -7   2    0.10    0.18
  -8  -7   2   -0.02    0.27
   8  -7  -2   -0.44    0.21
   8  -7  -2   -0.13    0.20
   8  -7  -2    0.40    0.31
   8   7  -2    0.12    0.30
  -8   7   2   -0.09    0.23
  -8   7   2    0.28    0.30
   8   7  -2   -0.05    0.27
  -7  -7   2    3.88    0.42
   7  -7  -2    3.24    0.49
  -7  -7   2    3.52    0.41
   7  -7  -2    2.75    0.36
  -7  -7   2    3.29    0.36
  -7  -7   2    2.92    0.41
   7  -7  -2    3.60    0.48
   7   7  -2    3.11    0.54
   7   7  -2    3.37    0.46
  -7   7   2    3.65    0.47
  -7   7   2    3.04    0.44
   6  -7  -2    2.86    0.41
  -6  -7   2    2.31    0.33
   6  -7  -2    2.47    0.17
   6  -7  -2    1.84    0.36
  -6  -7   2    2.73    0.32
   6  -7  -2    2.35    0.30
  -6  -7   2    2.40    0.32
  -6  -7   2    2.89    0.32
   6   7  -2    2.86    0.46
   6   7  -2    2.49    0.32
   6   7  -2    3.03    0.39
  -6   7   2    2.42    0.18
  -6   7   2    2.84    0.41
  -6   7   2    2.60    0.38
   5  -7  -2    0.91    0.13
  -5  -7   2    0.84    0.19
  -5  -7   2    0.76    0.19
   5  -7  -2    1.03    0.26
  -5  -7   2    0.88    0.22
   5  -7  -2    0.88    0.25
   5  -7  -2    0.67    0.17
  -5  -7   2    0.88    0.20
  -5   7   2    0.98    0.11
  -5   7   2    1.23    0.27
  -5   7   2    0.50    0.21
   5   7  -2    0.79    0.27
   5   7  -2    1.39    0.23
   5   7  -2    0.68    0.21
  -4  -7   2    4.65    0.32
  -4  -7   2    4.74    0.31
   4  -7  -2    4.65    0.30
  -4  -7   2    4.70    0.28
   4  -7  -2    4.86    0.24
   4  -7  -2    4.88    0.47
   4  -7  -2    4.45    0.31
  -4  -7   2    4.42    0.36
   4  -7  -2    4.80    0.45
   4   7  -2    4.41    0.36
  -4   7   2    5.46    0.39
  -4   7   2    3.30    0.38
   4   7  -2    4.91    0.50
   4   7  -2    4.09    0.30
   4   7  -2    4.34    0.31
  -4   7   2    4.73    0.17
   3  -7  -2    2.54    0.18
  -3  -7   2    2.13    0.17
  -3  -7   2    2.19    0.24
   3  -7  -2    2.43    0.22
  -3  -7   2    2.84    0.28
   3  -7  -2    2.51    0.31
   3  -7  -2    2.16    0.20
  -3   7   2    2.52    0.31
   3   7  -2    2.44    0.27
  -3   7   2    1.93    0.24
   3   7  -2    2.68    0.25
   3   7  -2    2.66    0.36
   3   7  -2    2.21    0.27
  -2  -7   2    1.85    0.12
   2  -7  -2    1.59    0.17
  -2  -7   2    1.73    0.22
   2  -7  -2    1.44    0.15
  -2  -7   2    1.38    0.20
  -2  -7   2    1.80    0.22
   2  -7  -2    1.54    0.16
   2  -7  -2    1.80    0.13
  -2   7   2    1.75    0.25
  -2   7   2    1.56    0.20
   2   7  -2    2.47    0.31
   2   7  -2    1.80    0.25
   2   7  -2    2.15    0.21
   1  -7  -2   30.05    0.76
   1  -7  -2   29.77    0.94
   1  -7  -2   30.17    0.81
  -1  -7   2   29.98    0.90
  -1  -7   2   28.84    0.89
  -1  -7   2   30.30    0.89
   1  -7  -2   30.63    0.85
   1  -7  -2   29.72    0.75
   1   7  -2   30.98    0.71
   1   7  -2   29.43    0.83
  -1   7   2   29.57    0.91
  -1   7   2   30.51    0.81
   1   7  -2   30.83    0.94
   1   7  -2   28.25    0.97
   0  -7  -2   70.77    1.86
   0  -7   2   73.51    1.84
   0  -7  -2   73.22    1.67
   0  -7   2   74.86    1.82
   0  -7  -2   73.86    1.71
   0  -7  -2   73.34    1.80
   0  -7   2   74.74    1.83
   0  -7  -2   72.61    1.65
   0   7  -2   73.45    1.69
   0   7   2   73.52    1.77
   0   7  -2   75.05    1.88
   0   7  -2   71.45    1.91
   0   7   2   74.84    1.69
   0   7  -2   73.39    1.66
   0   7   2   74.98    1.94
   0   7  -2   75.03    1.76
   1  -7   2    3.57    0.28
  -1  -7  -2    4.48    0.33
   1  -7   2    4.12    0.28
  -1  -7  -2    3.81    0.23
  -1  -7  -2    4.26    0.25
   1  -7   2    4.01    0.30
  -1  -7  -2    3.97    0.20
  -1  -7  -2    3.35    0.26
  -1  -7  -2    4.16    0.18
  -1   7  -2    3.90    0.25
  -1   7  -2    4.38    0.22
  -1   7  -2    3.85    0.36
  -1   7  -2    4.62    0.33
   1   7   2    3.71    0.31
  -1   7  -2    4.01    0.25
   1   7   2    3.98    0.25
  -2  -7  -2   10.12    0.35
   2  -7   2    9.59    0.46
  -2  -7  -2   10.11    0.43
   2  -7   2   10.34    0.51
  -2  -7  -2   10.64    0.42
   2  -7   2    9.88    0.44
  -2  -7  -2   10.58    0.46
   2  -7   2    9.51    0.52
  -2  -7  -2   10.92    0.51
   2   7   2    9.39    0.50
   2   7   2   10.40    0.37
   2   7   2   10.07    0.53
  -2   7  -2   10.05    0.43
  -2   7  -2   10.81    0.42
  -2   7  -2   11.38    0.46
  -2   7  -2   10.17    0.52
   3  -7   2    0.62    0.15
   3  -7   2    0.57    0.21
  -3  -7  -2    0.57    0.13
  -3  -7  -2    0.90    0.19
  -3  -7  -2    0.78    0.17
   3  -7   2    1.04    0.22
   3  -7   2    0.47    0.15
  -3  -7  -2    0.84    0.15
  -3  -7  -2    0.74    0.13
  -3  -7  -2    0.90    0.18
  -3   7  -2    0.53    0.17
   3   7   2    0.44    0.19
   3   7   2    0.72    0.22
   3   7   2    0.91    0.12
  -3   7  -2    0.81    0.17
  -3   7  -2    0.48    0.19
   4  -7   2    5.95    0.40
  -4  -7  -2    6.38    0.36
   4  -7   2    5.47    0.43
  -4  -7  -2    6.09    0.32
  -4  -7  -2    6.12    0.39
   4  -7   2    5.08    0.49
  -4  -7  -2    5.46    0.38
  -4  -7  -2    5.90    0.38
  -4   7  -2    5.83    0.44
  -4   7  -2    5.80    0.23
   4   7   2    5.91    0.44
   4   7   2    5.12    0.43
  -4   7  -2    5.97    0.37
  -4   7  -2    6.02    0.43
  -5  -7  -2    8.20    0.46
   5  -7   2    8.10    0.55
  -5  -7  -2    8.38    0.48
  -5  -7  -2    7.79    0.41
  -5  -7  -2    8.60    0.48
   5  -7   2    8.01    0.49
  -5  -7  -2    7.69    0.48
   5  -7   2    7.85    0.56
  -5   7  -2    7.86    0.52
   5   7   2    7.47    0.55
  -5   7  -2    8.38    0.47
  -5   7  -2    8.47    0.33
   5   7   2    9.21    0.61
  -5   7  -2    7.92    0.56
   6  -7   2    8.04    0.61
  -6  -7  -2    8.87    0.52
   6  -7   2    7.03    0.58
   6  -7   2    7.16    0.51
  -6  -7  -2    7.77    0.50
  -6  -7  -2    6.59    0.47
  -6  -7  -2    7.79    0.45
  -6  -7  -2    8.33    0.54
   6   7   2    7.73    0.58
   6   7   2    8.12    0.63
  -6   7  -2    7.23    0.55
  -6   7  -2    7.97    0.37
  -6   7  -2    7.55    0.57
  -7  -7  -2    5.97    0.48
   7  -7   2    6.06    0.68
   7  -7   2    6.12    0.57
  -7  -7  -2    6.83    0.46
  -7  -7  -2    5.76    0.48
   7  -7   2    5.80    0.65
  -7  -7  -2    6.68    0.51
  -7  -7  -2    6.85    0.61
   7   7   2    5.88    0.65
  -7   7  -2    5.48    0.59
   7   7   2    6.00    0.63
  -7   7  -2    5.22    0.61
  -8  -7  -2    0.87    0.26
   8  -7   2    0.99    0.40
  -8  -7  -2    1.11    0.34
   8  -7   2    0.82    0.37
  -8  -7  -2    0.69    0.28
  -8  -7  -2    0.60    0.27
   8  -7   2    1.79    0.39
  -8  -7  -2    1.07    0.32
   8   7   2    0.88    0.38
   8   7   2    0.35    0.31
  -8   7  -2    0.91    0.34
  -8   7  -2    1.45    0.41
  -9  -7  -2    2.58    0.43
  -9  -7  -2    2.46    0.42
   9  -7   2    2.75    0.53
  -9  -7  -2    3.21    0.51
   9  -7   2    2.09    0.45
  -9  -7  -2    2.02    0.45
  -9  -7  -2    2.81    0.45
   9  -7   2    1.67    0.52
  -9   7  -2    2.89    0.56
   9   7   2    1.62    0.52
  -9   7  -2    2.77    0.49
   9   7   2    2.34    0.50
  10  -7   2    1.06    0.45
 -10  -7  -2   -0.29    0.35
  10  -7   2    0.35    0.38
 -10  -7  -2    0.31    0.31
 -10  -7  -2    0.79    0.36
  10   7   2    0.00    0.41
 -10   7  -2    0.58    0.39
  10   7   2    0.50    0.40
 -10   7  -2    0.67    0.43
 -10   7  -2    0.23    0.31
 -11  -7  -2    0.72    0.40
  11  -7   2    0.79    0.53
 -11  -7  -2    0.70    0.49
  11  -7   2    1.18    0.54
 -11  -7  -2    0.39    0.37
 -11   7  -2    1.49    0.52
 -11   7  -2   -0.25    0.39
  11   7   2    1.76    0.60
  11   7   2    1.75    0.57
  11  -8  -2    0.30    0.38
  11  -8  -2    0.60    0.44
 -11  -8   2   -0.50    0.32
  11  -8  -2    0.33    0.43
  11   8  -2    0.17    0.52
 -11   8   2   -0.06    0.38
  11   8  -2    0.95    0.49
 -11   8   2    0.78    0.44
  10  -8  -2   -0.33    0.30
 -10  -8   2   -0.35    0.24
  10  -8  -2    0.10    0.30
  10  -8  -2   -0.14    0.33
 -10  -8   2    0.16    0.33
  10   8  -2   -0.26    0.36
  10   8  -2   -0.01    0.44
 -10   8   2    0.33    0.38
 -10   8   2   -0.39    0.36
  -9  -8   2    3.32    0.42
   9  -8  -2    2.97    0.58
   9  -8  -2    3.25    0.56
  -9  -8   2    3.08    0.46
   9  -8  -2    3.09    0.46
  -9  -8   2    3.56    0.49
  -9   8   2    3.39    0.55
   9   8  -2    2.92    0.63
   9   8  -2    2.96    0.53
  -9   8   2    3.22    0.56
  -8  -8   2    7.09    0.54
   8  -8  -2    7.05    0.71
   8  -8  -2    6.73    0.61
  -8  -8   2    7.40    0.60
  -8  -8   2    5.93    0.56
  -8  -8   2    6.74    0.49
   8  -8  -2    6.52    0.73
   8   8  -2    5.87    0.74
  -8   8   2    5.30    0.62
   8   8  -2    4.86    0.59
  -8   8   2    7.16    0.73
   7  -8  -2    0.21    0.26
   7  -8  -2   -0.18    0.18
  -7  -8   2   -0.22    0.22
   7  -8  -2    0.10    0.21
  -7  -8   2    0.07    0.19
  -7  -8   2    0.14    0.17
  -7  -8   2   -0.07    0.18
   7   8  -2    0.01    0.23
   7   8  -2   -0.32    0.24
  -7   8   2    0.17    0.22
  -7   8   2   -0.09    0.20
   6  -8  -2   -0.03    0.09
  -6  -8   2   -0.01    0.15
  -6  -8   2    0.12    0.14
   6  -8  -2   -0.11    0.23
   6  -8  -2    0.04    0.14
  -6  -8   2   -0.05    0.18
  -6  -8   2   -0.09    0.16
   6  -8  -2   -0.09    0.18
   6   8  -2    0.03    0.20
   6   8  -2    0.14    0.25
  -6   8   2    0.19    0.23
  -6   8   2    0.21    0.21
   5  -8  -2    0.30    0.21
   5  -8  -2    0.84    0.19
   5  -8  -2    0.70    0.27
  -5  -8   2    0.94    0.22
   5  -8  -2    0.91    0.14
  -5  -8   2    0.59    0.19
  -5  -8   2    0.89    0.24
  -5  -8   2    1.22    0.20
  -5   8   2    0.76    0.08
   5   8  -2    0.49    0.27
  -5   8   2    0.57    0.23
   5   8  -2    0.94    0.27
   5   8  -2    1.01    0.20
  -5   8   2    0.67    0.24
  -4  -8   2    1.31    0.17
   4  -8  -2    1.13    0.16
   4  -8  -2    1.32    0.28
   4  -8  -2    0.66    0.16
  -4  -8   2    1.27    0.21
   4  -8  -2    1.37    0.20
  -4  -8   2    1.30    0.24
  -4  -8   2    0.98    0.20
  -4   8   2    0.97    0.25
   4   8  -2    1.21    0.30
   4   8  -2    1.01    0.19
  -4   8   2    1.44    0.24
   4   8  -2    1.18    0.23
   4   8  -2    1.18    0.24
  -3  -8   2    2.23    0.28
   3  -8  -2    2.65    0.21
  -3  -8   2    2.33    0.27
  -3  -8   2    3.16    0.29
  -3  -8   2    2.63    0.28
  -3  -8   2    2.42    0.16
   3  -8  -2    2.64    0.33
   3  -8  -2    2.65    0.24
   3  -8  -2    2.68    0.22
   3   8  -2    2.75    0.38
  -3   8   2    2.25    0.26
  -3   8   2    2.72    0.34
   3   8  -2    3.23    0.28
   3   8  -2    3.10    0.34
   3   8  -2    2.86    0.31
  -2  -8   2   36.12    0.81
   2  -8  -2   36.57    0.99
   2  -8  -2   36.13    1.12
   2  -8  -2   36.50    0.94
  -2  -8   2   35.14    1.05
   2  -8  -2   37.01    0.95
  -2  -8   2   34.09    1.06
  -2  -8   2   37.20    1.01
  -2  -8   2   34.13    1.05
   2  -8  -2   36.52    0.90
  -2   8   2   35.60    1.11
   2   8  -2   35.00    1.20
  -2   8   2   36.16    1.01
   2   8  -2   36.39    1.10
   2   8  -2   36.29    0.99
   1  -8  -2    4.91    0.29
  -1  -8   2    4.93    0.26
  -1  -8   2    4.71    0.31
  -1  -8   2    5.51    0.34
   1  -8  -2    5.57    0.36
  -1  -8   2    4.81    0.32
   1  -8  -2    4.52    0.23
   1  -8  -2    5.03    0.24
   1  -8  -2    4.57    0.23
  -1   8   2    4.69    0.25
   1   8  -2    5.17    0.28
   1   8  -2    4.28    0.34
   1   8  -2    4.30    0.42
  -1   8   2    4.59    0.33
   1   8  -2    4.48    0.15
   0  -8   2    0.10    0.12
   0  -8  -2   -0.03    0.10
   0  -8   2    0.14    0.12
   0  -8  -2    0.02    0.06
   0  -8  -2    0.02    0.08
   0  -8  -2    0.16    0.13
   0  -8   2    0.01    0.13
   0  -8  -2    0.04    0.08
   0   8  -2    0.10    0.14
   0   8   2    0.10    0.15
   0   8  -2    0.12    0.07
   0   8  -2   -0.01    0.13
   0   8   2    0.04    0.07
   0   8  -2    0.10    0.09
   0   8   2    0.01    0.10
  -1  -8  -2   12.93    0.45
  -1  -8  -2   11.87    0.46
  -1  -8  -2   12.56    0.36
   1  -8   2   12.82    0.55
   1  -8   2   12.67    0.53
  -1  -8  -2   12.27    0.51
  -1  -8  -2   13.34    0.58
   1  -8   2   12.67    0.53
  -1  -8  -2   13.01    0.42
   1   8   2   13.02    0.60
  -1   8  -2   13.01    0.47
   1   8   2   12.25    0.47
  -1   8  -2   12.47    0.45
  -1   8  -2   11.99    0.42
  -1   8  -2   13.14    0.59
  -1   8  -2   11.14    0.57
  -2  -8  -2    1.42    0.23
   2  -8   2    1.55    0.22
  -2  -8  -2    1.64    0.23
  -2  -8  -2    1.24    0.19
   2  -8   2    1.30    0.24
   2  -8   2    1.21    0.20
  -2  -8  -2    1.65    0.20
  -2  -8  -2    1.63    0.14
  -2   8  -2    1.48    0.18
   2   8   2    1.65    0.28
   2   8   2    1.31    0.17
  -2   8  -2    1.66    0.28
  -2   8  -2    1.42    0.19
  -2   8  -2    1.81    0.22
  -3  -8  -2    2.97    0.22
  -3  -8  -2    2.68    0.31
   3  -8   2    3.29    0.39
   3  -8   2    3.03    0.32
  -3  -8  -2    2.72    0.27
  -3  -8  -2    2.76    0.30
  -3  -8  -2    2.96    0.23
   3  -8   2    2.98    0.36
   3  -8   2    3.20    0.31
  -3  -8  -2    2.96    0.20
  -3   8  -2    2.83    0.37
   3   8   2    3.35    0.39
   3   8   2    2.60    0.35
  -3   8  -2    3.36    0.33
   3   8   2    2.58    0.20
  -3   8  -2    3.64    0.29
  -4  -8  -2    7.84    0.39
   4  -8   2    6.51    0.48
  -4  -8  -2    7.34    0.44
  -4  -8  -2    7.29    0.44
   4  -8   2    7.19    0.52
   4  -8   2    6.91    0.44
  -4  -8  -2    6.82    0.42
  -4  -8  -2    7.00    0.34
   4  -8   2    8.04    0.42
   4   8   2    8.10    0.56
  -4   8  -2    6.64    0.46
  -4   8  -2    6.04    0.48
   4   8   2    7.87    0.53
  -4   8  -2    7.20    0.43
   5  -8   2    0.85    0.23
  -5  -8  -2    0.94    0.21
   5  -8   2    0.90    0.20
  -5  -8  -2    0.68    0.22
  -5  -8  -2    0.50    0.16
   5  -8   2    1.20    0.32
   5  -8   2    1.22    0.30
  -5  -8  -2    0.82    0.24
  -5  -8  -2    0.93    0.21
   5   8   2    0.77    0.27
   5   8   2    0.27    0.25
  -5   8  -2    0.92    0.26
  -5   8  -2    0.83    0.26
  -6  -8  -2    9.32    0.56
  -6  -8  -2    9.37    0.57
  -6  -8  -2    9.58    0.54
   6  -8   2    8.91    0.59
   6  -8   2    9.32    0.67
   6  -8   2    9.60    0.67
  -6  -8  -2   10.36    0.61
  -6  -8  -2    9.06    0.50
  -6   8  -2    9.68    0.66
   6   8   2    8.36    0.63
  -6   8  -2    8.68    0.66
   6   8   2   10.10    0.69
   7  -8   2    2.50    0.44
  -7  -8  -2    3.33    0.41
  -7  -8  -2    3.10    0.42
   7  -8   2    3.07    0.42
  -7  -8  -2    2.97    0.35
  -7  -8  -2    2.15    0.36
  -7  -8  -2    2.96    0.42
   7  -8   2    2.63    0.47
   7   8   2    3.42    0.56
  -7   8  -2    2.67    0.46
  -7   8  -2    1.90    0.41
   7   8   2    2.58    0.48
  -8  -8  -2    0.07    0.26
   8  -8   2   -0.26    0.27
  -8  -8  -2    0.27    0.27
  -8  -8  -2   -0.08    0.18
  -8  -8  -2   -0.04    0.20
  -8  -8  -2    0.34    0.29
   8  -8   2    0.07    0.24
   8  -8   2    0.13    0.28
  -8   8  -2    0.09    0.28
   8   8   2   -0.17    0.26
  -8   8  -2    0.90    0.36
   8   8   2    0.59    0.37
  -9  -8  -2    2.97    0.48
  -9  -8  -2    1.91    0.40
   9  -8   2    2.35    0.54
  -9  -8  -2    2.40    0.48
  -9  -8  -2    1.59    0.38
   9  -8   2    2.64    0.55
   9  -8   2    2.50    0.46
  -9  -8  -2    1.75    0.36
  -9   8  -2    2.57    0.56
   9   8   2    1.94    0.53
   9   8   2    2.45    0.59
  -9   8  -2    2.46    0.46
  -9   8  -2    2.78    0.56
 -10  -8  -2   -0.05    0.39
 -10  -8  -2    0.42    0.30
  10  -8   2    0.22    0.34
 -10  -8  -2   -0.19    0.29
 -10  -8  -2   -0.33    0.36
  10  -8   2    0.28    0.37
 -10  -8  -2    0.02    0.30
 -10   8  -2   -0.22    0.36
 -10   8  -2   -0.14    0.33
  10   8   2   -0.42    0.41
 -10   8  -2    0.57    0.36
  10   8   2    1.44    0.53
  11  -8   2    0.38    0.50
  11  -8   2    0.72    0.47
 -11  -8  -2    0.55    0.36
 -11   8  -2    0.57    0.47
  11   8   2   -0.55    0.49
 -11   8  -2    0.41    0.48
  11   8   2    0.11    0.47
 -11   8  -2    1.15    0.50
  11  -9  -2    0.86    0.52
 -11  -9   2    1.57    0.45
  11  -9  -2    0.53    0.43
  11  -9  -2    0.89    0.51
 -11   9   2    0.76    0.51
  11   9  -2    1.35    0.54
  11   9  -2    1.17    0.64
 -11   9   2    1.17    0.53
  10  -9  -2    1.43    0.40
  10  -9  -2    1.60    0.54
 -10  -9   2    0.18    0.35
  10  -9  -2    1.61    0.49
  10   9  -2    0.04    0.45
 -10   9   2    2.10    0.54
  10   9  -2    0.30    0.42
 -10   9   2    1.16    0.46
   9  -9  -2    0.63    0.32
   9  -9  -2    0.51    0.38
  -9  -9   2    0.27    0.28
   9  -9  -2    0.67    0.40
  -9  -9   2    0.27    0.30
  -9  -9   2    0.95    0.29
   9   9  -2    0.10    0.35
  -9   9   2    0.58    0.34
   9   9  -2    0.16    0.36
  -9   9   2    0.27    0.34
   8  -9  -2   18.78    0.92
  -8  -9   2   19.35    0.86
  -8  -9   2   19.63    0.87
   8  -9  -2   19.36    1.04
  -8  -9   2   17.98    0.90
   8  -9  -2   17.35    1.04
  -8  -9   2   19.69    0.98
  -8   9   2   20.02    1.06
   8   9  -2   19.92    1.02
   8   9  -2   20.82    1.21
  -8   9   2   21.13    1.04
  -7  -9   2    1.96    0.31
  -7  -9   2    1.67    0.29
   7  -9  -2    1.15    0.35
  -7  -9   2    0.83    0.27
   7  -9  -2    1.85    0.33
   7  -9  -2    1.20    0.37
  -7  -9   2    1.84    0.36
  -7   9   2    1.14    0.35
   7   9  -2    1.41    0.45
  -7   9   2    1.07    0.33
   7   9  -2    1.17    0.35
   6  -9  -2    0.43    0.28
  -6  -9   2    0.90    0.21
   6  -9  -2    0.54    0.21
   6  -9  -2    0.82    0.15
  -6  -9   2    0.34    0.22
  -6  -9   2    0.92    0.25
  -6  -9   2    0.76    0.25
   6  -9  -2    0.58    0.30
  -6   9   2    0.76    0.25
  -6   9   2    0.82    0.29
   6   9  -2    1.20    0.32
   6   9  -2    1.12    0.37
   5  -9  -2    0.28    0.12
  -5  -9   2    0.15    0.21
   5  -9  -2    0.30    0.15
  -5  -9   2    0.48    0.15
  -5  -9   2    0.56    0.19
  -5  -9   2    0.40    0.18
   5  -9  -2    0.26    0.23
   5   9  -2    0.49    0.19
   5   9  -2    0.45    0.26
  -5   9   2    0.40    0.19
  -5   9   2    0.48    0.23
  -4  -9   2    0.09    0.13
   4  -9  -2   -0.04    0.10
  -4  -9   2   -0.02    0.09
   4  -9  -2    0.04    0.11
   4  -9  -2    0.28    0.18
   4  -9  -2    0.01    0.09
  -4  -9   2   -0.21    0.10
  -4  -9   2    0.07    0.16
   4   9  -2   -0.17    0.10
  -4   9   2    0.09    0.16
   4   9  -2    0.22    0.17
   4   9  -2   -0.24    0.15
   4   9  -2    0.10    0.20
  -4   9   2    0.03    0.17
  -3  -9   2    8.31    0.47
  -3  -9   2    8.64    0.46
  -3  -9   2    9.00    0.50
   3  -9  -2    8.75    0.39
  -3  -9   2    9.04    0.44
   3  -9  -2    9.42    0.54
   3  -9  -2    9.01    0.41
   3  -9  -2    8.96    0.41
  -3  -9   2    8.84    0.28
  -3   9   2   10.03    0.47
   3   9  -2    8.42    0.57
  -3   9   2    9.43    0.54
   3   9  -2    8.03    0.48
   3   9  -2    9.27    0.43
  -2  -9   2    8.62    0.45
   2  -9  -2    7.68    0.36
   2  -9  -2    8.64    0.37
  -2  -9   2    8.24    0.45
  -2  -9   2    8.28    0.45
   2  -9  -2    7.90    0.49
   2  -9  -2    9.10    0.41
  -2  -9   2    8.44    0.38
   2  -9  -2    8.05    0.29
  -2   9   2    8.75    0.39
   2   9  -2    7.86    0.48
   2   9  -2    8.39    0.39
  -2   9   2    7.43    0.46
   2   9  -2    8.00    0.53
   1  -9  -2   42.55    1.18
   1  -9  -2   41.73    1.10
   1  -9  -2   42.16    1.09
  -1  -9   2   42.29    1.09
  -1  -9   2   42.13    1.23
  -1  -9   2   43.28    1.22
   1  -9  -2   43.22    1.08
  -1  -9   2   43.62    1.23
   1  -9  -2   40.45    1.27
   1   9  -2   44.25    1.37
   1   9  -2   40.31    1.25
  -1   9   2   42.11    1.24
   1   9  -2   41.20    1.11
  -1   9   2   42.15    1.08
   0  -9  -2    0.32    0.17
   0  -9   2    0.25    0.09
   0  -9   2    0.18    0.12
   0  -9   2    0.06    0.13
   0  -9  -2    0.40    0.11
   0  -9  -2    0.34    0.14
   0  -9   2    0.22    0.14
   0  -9  -2    0.29    0.10
   0  -9  -2    0.31    0.09
   0   9   2    0.28    0.08
   0   9  -2    0.39    0.17
   0   9   2    0.28    0.15
   0   9  -2    0.32    0.19
   0   9   2    0.19    0.15
   0   9  -2    0.23    0.07
   0   9  -2    0.23    0.10
   1  -9   2    1.53    0.13
   1  -9   2    1.53    0.25
  -1  -9  -2    1.06    0.17
   1  -9   2    1.60    0.23
  -1  -9  -2    1.80    0.25
  -1  -9  -2    1.14    0.22
  -1  -9  -2    1.34    0.16
   1  -9   2    1.34    0.22
  -1  -9  -2    1.22    0.18
  -1   9  -2    1.64    0.17
   1   9   2    1.42    0.12
  -1   9  -2    1.34    0.27
   1   9   2    1.48    0.27
  -1   9  -2    1.86    0.30
  -1   9  -2    1.68    0.19
  -1   9  -2    1.85    0.21
   1   9   2    1.60    0.22
   2  -9   2    0.86    0.18
   2  -9   2    0.81    0.06
   2  -9   2    0.96    0.21
  -2  -9  -2    0.58    0.15
  -2  -9  -2    0.84    0.21
  -2  -9  -2    0.66    0.17
   2  -9   2    1.20    0.22
  -2  -9  -2    0.82    0.17
  -2  -9  -2    0.69    0.10
  -2   9  -2    0.85    0.15
  -2   9  -2    0.72    0.17
   2   9   2    0.90    0.17
  -2   9  -2    0.89    0.17
   2   9   2    0.90    0.26
  -2   9  -2    0.77    0.23
  -3  -9  -2    0.04    0.14
  -3  -9  -2    0.12    0.09
  -3  -9  -2    0.20    0.13
   3  -9   2    0.03    0.12
  -3  -9  -2    0.13    0.10
  -3  -9  -2    0.27    0.13
   3  -9   2    0.28    0.17
   3  -9   2    0.25    0.15
   3   9   2    0.00    0.17
  -3   9  -2    0.22    0.14
  -3   9  -2    0.22    0.14
   3   9   2    0.23    0.12
  -3   9  -2    0.01    0.11
  -3   9  -2    0.34    0.20
   3   9   2    0.07    0.18
  -4  -9  -2    5.82    0.40
   4  -9   2    5.21    0.42
  -4  -9  -2    5.53    0.39
   4  -9   2    5.07    0.53
  -4  -9  -2    5.47    0.33
   4  -9   2    4.63    0.47
   4  -9   2    4.93    0.36
  -4  -9  -2    5.36    0.29
  -4  -9  -2    6.55    0.42
   4   9   2    4.45    0.51
  -4   9  -2    5.93    0.43
  -4   9  -2    5.21    0.52
   4   9   2    5.00    0.24
   4   9   2    5.28    0.53
  -5  -9  -2    1.61    0.28
  -5  -9  -2    1.51    0.24
  -5  -9  -2    1.71    0.29
   5  -9   2    1.21    0.24
   5  -9   2    1.41    0.28
  -5  -9  -2    1.74    0.23
   5  -9   2    1.29    0.34
   5  -9   2    1.45    0.32
  -5  -9  -2    1.51    0.29
  -5   9  -2    1.10    0.30
   5   9   2    1.39    0.32
  -5   9  -2    1.17    0.32
   5   9   2    1.36    0.36
  -6  -9  -2    2.33    0.35
  -6  -9  -2    2.46    0.29
  -6  -9  -2    2.15    0.34
   6  -9   2    3.19    0.43
   6  -9   2    2.32    0.43
  -6  -9  -2    2.71    0.34
  -6  -9  -2    2.17    0.34
   6  -9   2    2.25    0.43
   6  -9   2    2.80    0.32
   6   9   2    2.94    0.47
   6   9   2    3.00    0.46
  -6   9  -2    2.08    0.40
  -6   9  -2    2.39    0.43
  -7  -9  -2    0.99    0.31
   7  -9   2    1.13    0.39
   7  -9   2    1.12    0.39
  -7  -9  -2    1.14    0.30
  -7  -9  -2    0.51    0.23
  -7  -9  -2    1.01    0.24
   7  -9   2    1.02    0.24
   7  -9   2    0.73    0.29
  -7  -9  -2    1.09    0.29
   7   9   2    1.31    0.42
   7   9   2    0.51    0.31
  -7   9  -2    1.56    0.39
  -7   9  -2    0.74    0.32
  -8  -9  -2    1.65    0.36
  -8  -9  -2    1.35    0.34
   8  -9   2    1.40    0.38
   8  -9   2    1.50    0.50
  -8  -9  -2    2.04    0.44
  -8  -9  -2    1.26    0.30
  -8  -9  -2    1.71    0.38
   8  -9   2    1.78    0.45
   8   9   2    1.08    0.43
  -8   9  -2    0.85    0.36
   8   9   2    0.85    0.43
  -8   9  -2    2.08    0.46
   9  -9   2    0.34    0.43
   9  -9   2    1.50    0.42
  -9  -9  -2    0.59    0.32
  -9  -9  -2    0.56    0.30
  -9  -9  -2    0.81    0.33
   9  -9   2    0.62    0.36
  -9  -9  -2    0.98    0.33
  -9  -9  -2    0.48    0.37
   9   9   2    0.30    0.40
  -9   9  -2    0.41    0.31
  -9   9  -2    0.96    0.43
   9   9   2    1.05    0.47
  -9   9  -2    0.77    0.41
 -10  -9  -2    5.84    0.64
  10  -9   2    4.18    0.74
  10  -9   2    4.19    0.69
 -10  -9  -2    4.99    0.68
 -10  -9  -2    4.28    0.61
 -10   9  -2    4.94    0.80
 -10   9  -2    5.64    0.76
 -10   9  -2    5.03    0.71
  10   9   2    4.44    0.79
  10   9   2    5.70    0.81
 -10 -10   2    0.31    0.33
  10 -10  -2    0.53    0.45
  10 -10  -2    0.37    0.38
  10 -10  -2   -0.21    0.40
  10  10  -2    0.84    0.53
  10  10  -2    0.31    0.39
 -10  10   2    0.21    0.40
 -10  10   2    0.11    0.39
   9 -10  -2    1.15    0.45
  -9 -10   2    1.14    0.34
  -9 -10   2    1.18    0.34
   9 -10  -2    0.49    0.33
   9 -10  -2    0.18    0.39
  -9  10   2    0.69    0.41
  -9  10   2    0.56    0.36
   9  10  -2    0.28    0.42
   9  10  -2    0.63    0.40
   8 -10  -2    5.13    0.55
  -8 -10   2    5.76    0.57
  -8 -10   2    4.83    0.54
   8 -10  -2    5.19    0.72
  -8 -10   2    4.64    0.57
   8 -10  -2    4.79    0.67
  -8  10   2    4.76    0.64
  -8  10   2    5.71    0.69
   8  10  -2    5.03    0.61
   8  10  -2    3.64    0.63
  -7 -10   2    1.97    0.32
   7 -10  -2    2.15    0.44
  -7 -10   2    1.85    0.39
  -7 -10   2    2.30    0.39
  -7 -10   2    2.00    0.34
   7 -10  -2    2.46    0.38
  -7  10   2    2.23    0.44
   7  10  -2    2.54    0.51
   7  10  -2    1.93    0.41
  -7  10   2    1.42    0.36
  -6 -10   2    0.71    0.23
  -6 -10   2    0.41    0.16
   6 -10  -2    0.50    0.14
  -6 -10   2    0.60    0.26
   6 -10  -2    0.83    0.32
   6 -10  -2    0.26    0.19
  -6 -10   2    0.53    0.23
   6  10  -2    0.47    0.25
   6  10  -2   -0.42    0.23
  -6  10   2    0.40    0.25
  -6  10   2    0.36    0.26
   5 -10  -2    0.19    0.16
  -5 -10   2    0.03    0.17
   5 -10  -2   -0.08    0.21
  -5 -10   2   -0.04    0.15
   5 -10  -2    0.28    0.13
  -5 -10   2    0.00    0.18
  -5 -10   2    0.33    0.13
   5  10  -2    0.21    0.19
   5  10  -2    0.20    0.19
   5  10  -2   -0.22    0.22
  -5  10   2    0.13    0.18
  -5  10   2    0.40    0.22
   4 -10  -2   -0.07    0.19
  -4 -10   2    0.17    0.12
  -4 -10   2    0.04    0.16
  -4 -10   2    0.26    0.16
  -4 -10   2   -0.11    0.09
   4 -10  -2   -0.02    0.10
   4 -10  -2    0.06    0.13
   4  10  -2    0.08    0.16
   4  10  -2    0.07    0.18
  -4  10   2    0.19    0.19
  -4  10   2   -0.19    0.13
   4  10  -2    0.18    0.23
   3 -10  -2   16.07    0.60
  -3 -10   2   17.35    0.65
  -3 -10   2   15.87    0.71
   3 -10  -2   16.89    0.62
  -3 -10   2   16.68    0.69
  -3 -10   2   16.06    0.70
   3 -10  -2   16.29    0.61
   3  10  -2   17.80    0.86
  -3  10   2   16.52    0.65
   3  10  -2   15.91    0.70
   3  10  -2   16.83    0.62
  -3  10   2   16.26    0.76
  -2 -10   2    0.74    0.19
  -2 -10   2    0.87    0.16
   2 -10  -2    0.86    0.22
   2 -10  -2    0.59    0.11
  -2 -10   2    0.42    0.16
   2 -10  -2    0.59    0.14
   2 -10  -2    0.58    0.16
   2 -10  -2    0.75    0.16
  -2 -10   2    0.85    0.21
   2  10  -2    0.95    0.17
   2  10  -2    0.90    0.22
  -2  10   2    0.59    0.15
   2  10  -2    0.83    0.25
  -2  10   2    0.61    0.23
  -1 -10   2   26.95    0.93
   1 -10  -2   27.49    1.01
  -1 -10   2   30.23    0.98
   1 -10  -2   28.87    0.91
   1 -10  -2   28.46    0.81
   1 -10  -2   27.91    0.80
  -1 -10   2   29.15    0.95
  -1 -10   2   27.19    0.81
   1 -10  -2   28.60    0.83
   1  10  -2   29.14    1.00
  -1  10   2   27.56    0.97
   1  10  -2   27.81    0.83
  -1  10   2   28.47    1.07
  -1  10   2   28.76    0.79
   1  10  -2   28.19    1.07
   0 -10  -2   18.54    0.58
   0 -10  -2   18.32    0.61
   0 -10   2   18.51    0.74
   0 -10   2   18.76    0.71
   0 -10  -2   17.35    0.67
   0 -10   2   18.29    0.55
   0 -10   2   18.47    0.71
   0 -10  -2   17.51    0.58
   0 -10  -2   17.15    0.74
   0  10  -2   17.54    0.76
   0  10   2   18.39    0.50
   0  10  -2   16.81    0.77
   0  10  -2   16.90    0.60
   0  10  -2   18.08    0.49
   0  10   2   17.49    0.70
   0  10   2   18.60    0.81
   1 -10   2    1.19    0.21
   1 -10   2    1.11    0.24
  -1 -10  -2    1.03    0.21
   1 -10   2    1.37    0.13
  -1 -10  -2    1.27    0.19
  -1 -10  -2    1.35    0.17
  -1 -10  -2    0.90    0.24
   1 -10   2    1.11    0.22
  -1 -10  -2    1.19    0.18
   1  10   2    1.11    0.09
  -1  10  -2    1.16    0.19
  -1  10  -2    1.50    0.29
   1  10   2    0.83    0.24
  -1  10  -2    1.62    0.29
   1  10   2    1.24    0.22
  -1  10  -2    1.18    0.18
  -1  10  -2    1.15    0.15
   2 -10   2    3.89    0.36
  -2 -10  -2    2.99    0.35
  -2 -10  -2    3.19    0.30
  -2 -10  -2    3.37    0.14
   2 -10   2    3.38    0.12
   2 -10   2    3.13    0.38
  -2 -10  -2    3.42    0.32
  -2 -10  -2    3.16    0.35
   2 -10   2    2.99    0.32
   2  10   2    3.21    0.30
  -2  10  -2    3.38    0.27
  -2  10  -2    3.24    0.41
  -2  10  -2    3.46    0.41
  -2  10  -2    3.42    0.28
   2  10   2    4.29    0.47
  -2  10  -2    3.55    0.26
  -3 -10  -2    2.69    0.34
  -3 -10  -2    2.07    0.16
   3 -10   2    2.18    0.31
  -3 -10  -2    2.41    0.34
  -3 -10  -2    2.25    0.28
   3 -10   2    1.57    0.30
   3 -10   2    1.79    0.26
  -3  10  -2    1.97    0.34
  -3  10  -2    2.37    0.26
   3  10   2    2.40    0.39
  -3  10  -2    1.79    0.28
   3  10   2    3.35    0.44
   3  10   2    2.10    0.24
   4 -10   2    0.78    0.22
   4 -10   2    1.00    0.20
  -4 -10  -2    0.90    0.15
  -4 -10  -2    0.61    0.22
  -4 -10  -2    0.77    0.21
  -4 -10  -2    0.95    0.24
   4 -10   2    0.69    0.24
  -4  10  -2    0.91    0.29
   4  10   2    1.14    0.17
  -4  10  -2    1.43    0.28
   4  10   2    1.44    0.35
   4  10   2    1.28    0.34
   5 -10   2   17.82    0.74
   5 -10   2   18.25    0.95
  -5 -10  -2   18.62    0.81
   5 -10   2   19.10    0.92
  -5 -10  -2   20.19    0.84
  -5 -10  -2   19.33    0.66
  -5 -10  -2   19.58    0.83
   5 -10   2   18.47    0.83
  -5 -10  -2   18.66    0.69
  -5  10  -2   18.84    0.86
  -5  10  -2   16.90    0.92
   5  10   2   19.27    0.98
   5  10   2   19.09    0.92
  -6 -10  -2    3.91    0.45
   6 -10   2    5.24    0.40
  -6 -10  -2    3.93    0.46
  -6 -10  -2    4.67    0.43
   6 -10   2    4.67    0.50
  -6 -10  -2    4.37    0.35
   6 -10   2    4.12    0.57
   6 -10   2    3.54    0.50
  -6 -10  -2    3.69    0.44
  -6  10  -2    3.74    0.54
  -6  10  -2    5.28    0.56
   6  10   2    4.74    0.58
   6  10   2    4.54    0.60
  -7 -10  -2    0.19    0.25
   7 -10   2    0.01    0.24
   7 -10   2    0.15    0.31
   7 -10   2    0.58    0.21
  -7 -10  -2    0.40    0.24
  -7 -10  -2    0.14    0.24
   7 -10   2    0.41    0.31
  -7 -10  -2    0.32    0.20
  -7 -10  -2   -0.02    0.21
   7  10   2    0.22    0.30
   7  10   2    0.52    0.31
  -7  10  -2    0.51    0.30
  -7  10  -2    0.00    0.30
  -8 -10  -2   -0.35    0.26
  -8 -10  -2    0.12    0.24
  -8 -10  -2   -0.23    0.25
   8 -10   2    0.00    0.34
   8 -10   2    0.15    0.29
   8 -10   2    0.34    0.30
  -8  10  -2    0.22    0.31
  -8  10  -2   -0.11    0.24
   8  10   2   -0.68    0.29
   8  10   2    0.15    0.35
  -8  10  -2    0.22    0.33
  -9 -10  -2    1.96    0.46
   9 -10   2    0.19    0.35
   9 -10   2    1.28    0.46
   9 -10   2    1.78    0.54
  -9 -10  -2    1.03    0.36
  -9 -10  -2    0.32    0.33
   9  10   2    0.45    0.43
  -9  10  -2    1.01    0.45
   9  10   2    0.43    0.41
  -9  10  -2    1.01    0.42
  -9  10  -2    0.48    0.33
  10 -10   2    2.09    0.59
 -10 -10  -2    2.24    0.53
 -10 -10  -2    2.02    0.44
 -10 -10  -2    1.03    0.40
  10 -10   2    2.26    0.55
 -10  10  -2    3.13    0.57
 -10  10  -2    1.91    0.58
 -10  10  -2    2.74    0.65
  10  10   2    1.10    0.53
  10  10   2    2.47    0.66
 -10 -11   2    6.59    0.71
  10 -11  -2    6.50    0.79
  10 -11  -2    7.82    0.81
 -10  11   2    6.82    0.83
  10  11  -2    4.63    0.71
  10  11  -2    6.49    0.92
 -10  11   2    4.13    0.77
   9 -11  -2   -0.19    0.31
  -9 -11   2    0.15    0.28
  -9 -11   2    0.14    0.28
   9 -11  -2    0.41    0.38
   9  11  -2    0.62    0.45
  -9  11   2   -0.10    0.31
   9  11  -2   -0.90    0.31
  -9  11   2    0.37    0.39
  -8 -11   2    0.05    0.31
   8 -11  -2   -0.04    0.30
  -8 -11   2    0.13    0.25
  -8 -11   2    0.18    0.24
   8 -11  -2    0.05    0.25
   8  11  -2   -0.35    0.26
  -8  11   2    0.04    0.30
   8  11  -2   -0.06    0.35
  -8  11   2    0.22    0.27
  -7 -11   2    0.04    0.21
  -7 -11   2   -0.45    0.24
   7 -11  -2   -0.14    0.24
  -7 -11   2    0.01    0.23
   7 -11  -2    0.23    0.24
  -7  11   2    0.21    0.31
  -7  11   2    0.38    0.25
   7  11  -2    0.23    0.32
   7  11  -2   -0.04    0.28
  -6 -11   2    2.81    0.43
   6 -11  -2    2.60    0.28
  -6 -11   2    3.17    0.42
   6 -11  -2    2.07    0.34
  -6 -11   2    2.71    0.40
   6 -11  -2    3.43    0.50
  -6  11   2    2.76    0.48
   6  11  -2    2.80    0.45
   6  11  -2    3.02    0.54
  -6  11   2    3.33    0.44
  -5 -11   2   12.29    0.69
  -5 -11   2   11.53    0.62
   5 -11  -2   12.08    0.61
   5 -11  -2   11.80    0.50
   5 -11  -2   11.72    0.72
  -5 -11   2   11.96    0.62
   5  11  -2   11.75    0.60
  -5  11   2   12.44    0.65
  -5  11   2   11.03    0.72
   5  11  -2   11.31    0.69
   5  11  -2   11.65    0.79
   4 -11  -2    1.37    0.23
  -4 -11   2    1.30    0.28
  -4 -11   2    1.50    0.28
   4 -11  -2    1.40    0.31
  -4 -11   2    1.16    0.24
   4 -11  -2    1.52    0.23
   4  11  -2    1.06    0.28
  -4  11   2    1.30    0.33
  -4  11   2    0.94    0.23
   4  11  -2    1.18    0.28
   4  11  -2    1.64    0.38
   3 -11  -2    2.93    0.40
  -3 -11   2    2.82    0.35
  -3 -11   2    2.77    0.36
   3 -11  -2    3.19    0.31
  -3 -11   2    3.29    0.36
  -3 -11   2    3.35    0.33
   3 -11  -2    2.99    0.31
   3 -11  -2    3.24    0.33
  -3  11   2    3.19    0.33
   3  11  -2    3.29    0.39
   3  11  -2    3.51    0.49
  -3  11   2    2.74    0.39
   2 -11  -2    0.46    0.15
  -2 -11   2    0.38    0.19
   2 -11  -2    0.46    0.15
   2 -11  -2    0.38    0.20
  -2 -11   2    0.65    0.16
  -2 -11   2    0.67    0.21
  -2 -11   2    0.14    0.15
   2 -11  -2    0.44    0.15
   2 -11  -2    0.48    0.11
   2  11  -2    0.79    0.25
  -2  11   2    1.07    0.26
   2  11  -2    0.83    0.25
  -2  11   2    0.72    0.16
   1 -11  -2    6.22    0.30
  -1 -11   2    6.99    0.45
  -1 -11   2    6.59    0.45
   1 -11  -2    6.03    0.33
  -1 -11   2    6.32    0.32
   1 -11  -2    6.29    0.39
   1 -11  -2    5.80    0.35
   1 -11  -2    6.30    0.45
  -1 -11   2    6.53    0.44
   1  11  -2    5.75    0.49
  -1  11   2    6.17    0.46
   1  11  -2    7.00    0.47
  -1  11   2    6.22    0.50
  -1  11   2    6.51    0.30
   0 -11   2    2.16    0.19
   0 -11  -2    1.89    0.26
   0 -11  -2    1.81    0.20
   0 -11   2    1.64    0.25
   0 -11   2    1.54    0.29
   0 -11  -2    2.28    0.32
   0 -11  -2    1.90    0.21
   0 -11   2    1.40    0.24
   0 -11  -2    1.44    0.21
   0  11   2    2.39    0.32
   0  11  -2    2.22    0.37
   0  11   2    1.77    0.14
   0  11  -2    2.04    0.35
   0  11  -2    1.60    0.13
   0  11   2    1.34    0.30
   1 -11   2    3.29    0.35
   1 -11   2    2.93    0.18
  -1 -11  -2    3.12    0.29
   1 -11   2    2.94    0.34
  -1 -11  -2    3.39    0.27
  -1 -11  -2    3.05    0.24
  -1 -11  -2    3.19    0.40
  -1 -11  -2    3.32    0.36
   1 -11   2    2.88    0.35
   1  11   2    3.18    0.34
  -1  11  -2    3.48    0.24
  -1  11  -2    2.70    0.38
  -1  11  -2    3.46    0.22
   1  11   2    2.73    0.39
  -1  11  -2    3.16    0.42
   2 -11   2    6.34    0.44
   2 -11   2    5.38    0.44
   2 -11   2    5.96    0.17
  -2 -11  -2    5.60    0.36
  -2 -11  -2    6.06    0.47
  -2 -11  -2    5.27    0.40
   2 -11   2    6.16    0.41
  -2 -11  -2    6.14    0.40
   2  11   2    6.83    0.39
  -2  11  -2    5.32    0.53
  -2  11  -2    6.58    0.34
  -2  11  -2    6.01    0.37
  -2  11  -2    6.59    0.52
   2  11   2    6.83    0.53
  -3 -11  -2    8.48    0.49
  -3 -11  -2    7.64    0.49
   3 -11   2    8.99    0.50
   3 -11   2    8.59    0.53
   3 -11   2    8.51    0.58
  -3 -11  -2    7.15    0.44
  -3 -11  -2    8.05    0.56
  -3  11  -2    8.63    0.49
   3  11   2    7.35    0.41
  -3  11  -2    8.61    0.60
  -3  11  -2    8.54    0.44
   3  11   2    8.51    0.61
   3  11   2    8.11    0.59
   4 -11   2   24.92    0.96
  -4 -11  -2   22.63    0.89
  -4 -11  -2   25.32    0.96
   4 -11   2   22.30    0.86
   4 -11   2   22.79    1.03
  -4 -11  -2   23.89    0.91
   4  11   2   22.36    1.04
  -4  11  -2   22.33    0.90
  -4  11  -2   24.47    0.87
  -4  11  -2   23.74    1.05
   4  11   2   24.21    1.11
  -5 -11  -2    0.01    0.19
  -5 -11  -2    0.03    0.20
   5 -11   2   -0.17    0.19
  -5 -11  -2    0.29    0.23
   5 -11   2   -0.04    0.20
   5 -11   2    0.07    0.17
   5  11   2    0.29    0.31
   5  11   2   -0.16    0.22
  -5  11  -2    0.30    0.23
  -5  11  -2    0.36    0.27
  -5  11  -2    0.04    0.19
  -6 -11  -2    7.34    0.65
  -6 -11  -2    7.78    0.56
  -6 -11  -2    6.91    0.56
   6 -11   2    5.60    0.64
   6 -11   2    6.86    0.73
   6 -11   2    7.35    0.47
   6 -11   2    7.46    0.59
  -6  11  -2    6.94    0.52
  -6  11  -2    7.59    0.63
   6  11   2    7.36    0.74
   6  11   2    7.92    0.78
  -6  11  -2    6.41    0.71
   7 -11   2    3.49    0.39
   7 -11   2    3.72    0.52
   7 -11   2    3.51    0.59
  -7 -11  -2    4.04    0.49
  -7 -11  -2    3.82    0.51
  -7 -11  -2    3.11    0.46
   7 -11   2    2.26    0.50
   7  11   2    4.65    0.63
   7  11   2    2.95    0.51
  -7  11  -2    2.84    0.45
  -7  11  -2    3.39    0.57
  -7  11  -2    5.73    0.68
  -8 -11  -2    0.44    0.30
  -8 -11  -2    0.09    0.22
   8 -11   2   -0.24    0.33
  -8 -11  -2    0.50    0.29
   8 -11   2    0.19    0.31
   8 -11   2   -0.53    0.31
   8  11   2    0.51    0.38
  -8  11  -2    0.46    0.38
  -8  11  -2    0.10    0.30
  -8  11  -2   -0.27    0.34
   8  11   2    0.29    0.39
   9 -11   2    0.84    0.45
   9 -11   2    0.25    0.40
   9 -11   2    0.49    0.38
  -9 -11  -2    0.85    0.31
  -9 -11  -2    0.81    0.34
  -9 -11  -2    0.13    0.38
   9  11   2    1.29    0.53
  -9  11  -2    0.25    0.34
  -9  11  -2    1.03    0.47
   9  11   2    0.93    0.49
  -9  11  -2    0.70    0.41
  10 -11   2   -0.14    0.41
 -10 -11  -2    0.57    0.46
 -10 -11  -2    0.25    0.36
 -10 -11  -2    0.43    0.39
  10 -11   2    0.48    0.47
 -10  11  -2    0.19    0.49
  10  11   2    0.21    0.43
 -10  11  -2    0.20    0.44
 -10  11  -2    0.90    0.39
  10  11   2    0.14    0.46
  10 -12  -2    0.50    0.48
  10 -12  -2    0.21    0.39
 -10 -12   2   -0.46    0.28
 -10  12   2    0.07    0.49
  10  12  -2   -0.84    0.40
 -10  12   2   -0.33    0.44
  10  12  -2    0.06    0.44
   9 -12  -2    4.24    0.71
  -9 -12   2    5.42    0.59
  -9 -12   2    4.33    0.61
   9 -12  -2    4.74    0.63
   9  12  -2    4.70    0.69
  -9  12   2    4.13    0.66
  -9  12   2    4.60    0.73
   9  12  -2    4.36    0.79
  -8 -12   2    2.70    0.43
   8 -12  -2    3.22    0.50
  -8 -12   2    2.24    0.47
   8 -12  -2    2.46    0.58
  -8 -12   2    1.92    0.42
   8  12  -2    2.28    0.50
   8  12  -2    1.98    0.58
  -8  12   2    2.74    0.52
  -8  12   2    2.04    0.50
   7 -12  -2    1.34    0.33
   7 -12  -2    1.83    0.41
  -7 -12   2    1.60    0.33
  -7 -12   2    1.25    0.32
  -7 -12   2    1.80    0.40
   7  12  -2    1.32    0.46
  -7  12   2    1.11    0.41
  -7  12   2    1.44    0.40
   7  12  -2    1.25    0.39
   6 -12  -2    1.23    0.31
  -6 -12   2    1.44    0.31
   6 -12  -2    0.54    0.30
  -6 -12   2    1.26    0.33
  -6 -12   2    1.51    0.31
  -6  12   2    1.25    0.30
  -6  12   2    1.90    0.43
   6  12  -2    0.54    0.28
   6  12  -2    1.35    0.43
   5 -12  -2    0.32    0.20
   5 -12  -2    0.51    0.26
  -5 -12   2    0.15    0.18
  -5 -12   2    0.42    0.25
   5 -12  -2    0.44    0.16
  -5 -12   2    0.22    0.22
  -5  12   2    0.35    0.24
   5  12  -2    0.34    0.23
   5  12  -2    0.38    0.24
   5  12  -2    0.50    0.29
  -5  12   2    0.58    0.31
  -4 -12   2    4.82    0.45
   4 -12  -2    5.95    0.38
  -4 -12   2    6.97    0.52
   4 -12  -2    6.77    0.46
  -4 -12   2    6.97    0.49
   4  12  -2    5.36    0.64
   4  12  -2    6.87    0.49
   4  12  -2    6.38    0.60
  -4  12   2    6.24    0.45
  -4  12   2    5.99    0.60
   3 -12  -2   13.87    0.61
  -3 -12   2   14.26    0.71
   3 -12  -2   14.48    0.62
   3 -12  -2   13.90    0.76
  -3 -12   2   14.09    0.69
  -3 -12   2   14.68    0.72
  -3 -12   2   15.06    0.63
  -3  12   2   13.75    0.78
   3  12  -2   14.27    0.72
  -3  12   2   14.51    0.61
   3  12  -2   13.02    0.80
   2 -12  -2    1.47    0.23
  -2 -12   2    1.43    0.28
   2 -12  -2    1.79    0.25
   2 -12  -2    0.88    0.27
  -2 -12   2    1.52    0.23
  -2 -12   2    1.57    0.28
   2 -12  -2    1.64    0.16
  -2 -12   2    1.60    0.29
  -2  12   2    1.81    0.23
   2  12  -2    1.59    0.31
  -2  12   2    1.46    0.32
   2  12  -2    1.91    0.38
   1 -12  -2    2.22    0.21
   1 -12  -2    1.64    0.23
  -1 -12   2    1.65    0.27
  -1 -12   2    1.60    0.27
  -1 -12   2    1.88    0.22
   1 -12  -2    1.77    0.23
   1 -12  -2    1.85    0.32
  -1 -12   2    2.03    0.32
   1 -12  -2    1.59    0.26
   1  12  -2    1.66    0.31
  -1  12   2    1.92    0.20
  -1  12   2    2.08    0.34
   1  12  -2    1.40    0.35
  -1  12   2    1.84    0.38
   0 -12  -2    2.17    0.34
   0 -12  -2    1.47    0.22
   0 -12  -2    1.38    0.26
   0 -12   2    1.57    0.28
   0 -12   2    1.52    0.18
   0 -12   2    1.68    0.27
   0 -12   2    1.69    0.28
   0 -12  -2    1.66    0.21
   0 -12  -2    1.21    0.19
   0  12  -2    1.70    0.34
   0  12   2    1.42    0.13
   0  12  -2    1.68    0.34
   0  12   2    1.96    0.32
   0  12   2    2.00    0.37
   0  12  -2    1.68    0.12
  -1 -12  -2    1.72    0.25
  -1 -12  -2    2.39    0.27
   1 -12   2    2.07    0.30
  -1 -12  -2    2.19    0.36
  -1 -12  -2    1.99    0.23
   1 -12   2    2.20    0.33
   1 -12   2    1.87    0.15
   1 -12   2    1.91    0.29
  -1 -12  -2    1.87    0.30
  -1  12  -2    1.86    0.34
  -1  12  -2    2.24    0.20
   1  12   2    2.03    0.31
   1  12   2    2.06    0.36
  -1  12  -2    1.93    0.35
  -1  12  -2    1.81    0.21
  -2 -12  -2    0.21    0.16
  -2 -12  -2    0.10    0.19
   2 -12   2    0.16    0.16
  -2 -12  -2    0.24    0.16
   2 -12   2    0.32    0.22
   2 -12   2    0.37    0.20
  -2 -12  -2    0.36    0.15
  -2  12  -2   -0.06    0.11
  -2  12  -2    0.22    0.15
  -2  12  -2    0.15    0.21
   2  12   2    0.11    0.17
   2  12   2    0.13    0.26
  -2  12  -2    0.33    0.22
  -3 -12  -2    7.09    0.46
   3 -12   2    7.65    0.53
  -3 -12  -2    7.61    0.50
   3 -12   2    7.00    0.45
  -3 -12  -2    7.80    0.56
  -3 -12  -2    6.55    0.50
   3 -12   2    7.45    0.55
  -3  12  -2    7.77    0.43
  -3  12  -2    5.22    0.59
   3  12   2    7.54    0.43
  -3  12  -2    7.18    0.45
  -3  12  -2    6.36    0.62
   3  12   2    6.42    0.64
   3  12   2    6.72    0.67
   4 -12   2   11.21    0.66
   4 -12   2   13.10    0.77
  -4 -12  -2   11.12    0.61
   4 -12   2   11.49    0.59
  -4 -12  -2   11.65    0.66
  -4 -12  -2   12.01    0.63
   4  12   2   10.23    0.74
  -4  12  -2   11.95    0.58
   4  12   2   11.27    0.74
  -4  12  -2   11.96    0.64
  -4  12  -2   10.97    0.74
  -5 -12  -2   -0.03    0.20
   5 -12   2    0.14    0.19
   5 -12   2    0.10    0.22
  -5 -12  -2   -0.16    0.18
   5 -12   2   -0.18    0.21
  -5 -12  -2    0.16    0.22
  -5  12  -2    0.17    0.18
   5  12   2   -0.14    0.23
  -5  12  -2    0.21    0.27
   5  12   2    0.11    0.27
  -5  12  -2   -0.08    0.22
  -6 -12  -2    0.53    0.27
  -6 -12  -2   -0.26    0.23
   6 -12   2   -0.09    0.22
   6 -12   2    0.21    0.27
  -6 -12  -2    0.03    0.20
   6 -12   2    0.22    0.20
  -6  12  -2   -0.03    0.24
   6  12   2    0.66    0.37
  -6  12  -2    0.30    0.28
  -6  12  -2    0.66    0.25
   6  12   2    0.14    0.26
   7 -12   2    3.44    0.39
   7 -12   2    3.52    0.57
  -7 -12  -2    3.55    0.48
   7 -12   2    3.47    0.51
  -7 -12  -2    3.43    0.48
   7 -12   2    3.39    0.61
  -7 -12  -2    4.24    0.55
   7  12   2    3.07    0.58
  -7  12  -2    3.93    0.51
  -7  12  -2    3.68    0.59
   7  12   2    3.61    0.59
  -7  12  -2    3.31    0.58
  -8 -12  -2    1.13    0.38
   8 -12   2    1.54    0.49
  -8 -12  -2    1.06    0.37
   8 -12   2    1.38    0.42
  -8 -12  -2    0.75    0.34
   8 -12   2    0.08    0.38
  -8  12  -2    0.68    0.32
  -8  12  -2    0.74    0.41
  -8  12  -2    1.19    0.47
   8  12   2    0.87    0.44
   8  12   2    0.66    0.37
  -9 -12  -2   -0.25    0.37
   9 -12   2    0.84    0.45
  -9 -12  -2    0.02    0.29
   9 -12   2    0.39    0.41
   9 -12   2   -0.41    0.35
  -9 -12  -2    0.21    0.29
  -9  12  -2    0.23    0.34
  -9  12  -2   -0.17    0.36
   9  12   2    0.14    0.43
   9  12   2   -0.55    0.36
  -9  12  -2   -0.01    0.44
  -9 -13   2    3.42    0.50
   9 -13  -2    3.21    0.63
  -9 -13   2    3.98    0.59
   9 -13  -2    3.38    0.56
  -9  13   2    3.81    0.73
  -9  13   2    1.69    0.50
   9  13  -2    4.01    0.74
   9  13  -2    3.03    0.59
  -8 -13   2    7.22    0.75
  -8 -13   2    6.95    0.66
  -8 -13   2    4.32    0.57
   8 -13  -2    5.48    0.74
   8 -13  -2    7.38    0.71
  -8  13   2    5.80    0.73
   8  13  -2    4.82    0.79
   8  13  -2    5.96    0.69
  -8  13   2    4.93    0.74
  -7 -13   2    0.10    0.26
  -7 -13   2    0.36    0.30
   7 -13  -2    0.06    0.31
  -7 -13   2    0.07    0.22
   7 -13  -2   -0.17    0.24
  -7  13   2   -0.02    0.24
   7  13  -2   -0.25    0.31
  -7  13   2   -0.15    0.26
   7  13  -2   -0.09    0.30
  -6 -13   2    0.23    0.22
  -6 -13   2   -0.02    0.25
   6 -13  -2    0.22    0.29
   6 -13  -2    0.11    0.21
  -6 -13   2    0.20    0.26
   6  13  -2    0.09    0.31
  -6  13   2   -0.10    0.29
  -6  13   2    0.38    0.26
   6  13  -2    0.12    0.24
   5 -13  -2    1.15    0.28
  -5 -13   2    1.53    0.36
  -5 -13   2    1.51    0.33
  -5 -13   2    1.02    0.26
   5 -13  -2    0.91    0.22
   5 -13  -2    1.50    0.40
   5  13  -2    0.92    0.36
  -5  13   2    0.77    0.36
   5  13  -2    0.81    0.30
  -5  13   2    1.22    0.30
   5  13  -2    1.12    0.37
  -4 -13   2    1.56    0.31
   4 -13  -2    1.85    0.28
  -4 -13   2    1.52    0.28
   4 -13  -2    1.70    0.37
   4 -13  -2    1.70    0.28
   4  13  -2    1.54    0.36
  -4  13   2    1.52    0.29
   4  13  -2    2.00    0.45
   4  13  -2    1.15    0.31
  -4  13   2    1.76    0.39
  -3 -13   2    1.44    0.30
  -3 -13   2    1.19    0.29
  -3 -13   2    1.45    0.26
   3 -13  -2    1.18    0.24
   3 -13  -2    0.98    0.22
   3 -13  -2    1.21    0.32
  -3 -13   2    0.95    0.26
   3  13  -2    1.30    0.32
  -3  13   2    1.41    0.25
  -3  13   2    1.30    0.36
   3  13  -2    0.50    0.30
  -2 -13   2    0.47    0.24
  -2 -13   2    0.79    0.25
   2 -13  -2    0.60    0.19
  -2 -13   2    0.52    0.23
  -2 -13   2    0.89    0.19
   2 -13  -2    0.81    0.28
   2 -13  -2    0.33    0.18
  -2  13   2    0.41    0.27
  -2  13   2    0.62    0.17
   2  13  -2    0.85    0.32
   2  13  -2    0.45    0.27
  -2  13   2    0.64    0.29
  -1 -13   2    7.61    0.54
   1 -13  -2    7.74    0.55
   1 -13  -2    7.13    0.46
  -1 -13   2    6.99    0.38
   1 -13  -2    6.99    0.35
  -1 -13   2    7.52    0.52
   1 -13  -2    7.27    0.44
  -1 -13   2    7.63    0.50
   1  13  -2    6.88    0.69
   1  13  -2    8.06    0.57
  -1  13   2    7.94    0.61
  -1  13   2    6.81    0.32
  -1  13   2    7.80    0.56
   0 -13   2    0.32    0.23
   0 -13   2    0.28    0.11
   0 -13  -2    0.22    0.21
   0 -13   2   -0.06    0.15
   0 -13   2    0.30    0.19
   0 -13  -2   -0.02    0.15
   0 -13  -2    0.13    0.15
   0  13   2    0.70    0.27
   0  13  -2    0.08    0.19
   0  13   2    0.18    0.20
   0  13  -2    0.05    0.24
   1 -13   2    2.67    0.35
   1 -13   2    3.21    0.38
  -1 -13  -2    3.57    0.32
  -1 -13  -2    3.08    0.33
   1 -13   2    2.80    0.40
   1 -13   2    2.74    0.19
  -1 -13  -2    2.56    0.36
  -1 -13  -2    2.93    0.43
  -1  13  -2    2.73    0.42
  -1  13  -2    3.32    0.22
   1  13   2    2.68    0.36
   1  13   2    3.43    0.48
  -1  13  -2    2.98    0.25
  -1  13  -2    2.97    0.43
   2 -13   2    6.15    0.45
  -2 -13  -2    6.20    0.48
  -2 -13  -2    7.14    0.54
  -2 -13  -2    5.36    0.39
   2 -13   2    6.76    0.51
  -2 -13  -2    6.33    0.45
   2 -13   2    6.81    0.56
  -2  13  -2    5.37    0.34
   2  13   2    5.27    0.41
  -2  13  -2    5.90    0.60
  -2  13  -2    5.78    0.62
   2  13   2    5.77    0.63
  -2  13  -2    5.78    0.37
  -3 -13  -2    0.26    0.25
  -3 -13  -2    0.57    0.23
   3 -13   2    0.24    0.17
  -3 -13  -2    0.68    0.24
   3 -13   2    0.34    0.22
  -3 -13  -2    0.44    0.19
   3  13   2    0.07    0.19
  -3  13  -2    0.23    0.16
   3  13   2    0.89    0.32
  -3  13  -2    0.41    0.21
   3  13   2    0.50    0.31
  -3  13  -2    0.24    0.26
  -3  13  -2    0.41    0.29
  -4 -13  -2    1.07    0.26
  -4 -13  -2    1.20    0.30
   4 -13   2    0.91    0.32
   4 -13   2    1.05    0.26
   4 -13   2    1.31    0.31
  -4 -13  -2    0.85    0.26
   4  13   2    0.83    0.34
   4  13   2    0.99    0.33
  -4  13  -2    0.88    0.25
  -4  13  -2    0.94    0.29
  -4  13  -2    0.78    0.35
   5 -13   2    0.27    0.26
   5 -13   2    0.02    0.25
  -5 -13  -2    0.12    0.18
   5 -13   2    0.36    0.21
  -5 -13  -2   -0.23    0.22
  -5 -13  -2    0.13    0.22
  -5  13  -2   -0.07    0.26
   5  13   2    0.01    0.29
  -5  13  -2    0.19    0.21
   5  13   2    0.19    0.27
  -5  13  -2    0.34    0.26
   6 -13   2    5.98    0.72
  -6 -13  -2    6.27    0.62
   6 -13   2    7.41    0.69
   6 -13   2    7.33    0.50
  -6 -13  -2    6.99    0.67
  -6 -13  -2    6.55    0.61
   6  13   2    6.10    0.71
  -6  13  -2    7.05    0.63
   6  13   2    6.66    0.79
  -6  13  -2    4.56    0.66
  -6  13  -2    7.01    0.70
  -7 -13  -2   -0.21    0.25
   7 -13   2    0.18    0.31
  -7 -13  -2    0.00    0.24
   7 -13   2    0.63    0.39
  -7 -13  -2    0.14    0.30
   7  13   2   -0.26    0.32
  -7  13  -2    0.40    0.39
   7  13   2    0.98    0.45
  -7  13  -2    0.43    0.29
  -7  13  -2    0.15    0.35
  -8 -13  -2   -0.55    0.30
  -8 -13  -2   -0.03    0.29
  -8 -13  -2    0.25    0.25
   8 -13   2   -0.14    0.31
   8 -13   2    0.25    0.34
   8  13   2    0.37    0.37
   8  13   2   -0.25    0.39
  -8  13  -2   -0.22    0.42
  -8  13  -2   -0.29    0.36
  -8  13  -2    0.65    0.33
   9 -13   2    0.45    0.39
  -9 -13  -2   -0.90    0.36
  -9 -13  -2    0.14    0.34
   9 -13   2    0.22    0.42
  -9 -13  -2    0.09    0.28
  -9  13  -2   -0.35    0.35
   9  13   2    0.39    0.42
  -9  13  -2   -0.01    0.45
   9  13   2    0.23    0.44
  -9  13  -2    0.35    0.36
   9 -14  -2    0.61    0.52
  -9 -14   2    1.46    0.44
  -9 -14   2    0.90    0.37
   9 -14  -2    1.54    0.49
  -9  14   2    1.46    0.53
   9  14  -2    0.90    0.43
  -9  14   2    1.49    0.55
   9  14  -2    1.71    0.64
  -8 -14   2    4.68    0.60
  -8 -14   2    4.10    0.63
  -8 -14   2    5.03    0.60
   8 -14  -2    5.29    0.64
   8 -14  -2    4.94    0.75
   8  14  -2    3.66    0.62
  -8  14   2    5.69    0.70
   8  14  -2    3.80    0.73
  -8  14   2    4.18    0.75
   7 -14  -2   -0.12    0.25
  -7 -14   2    0.35    0.25
  -7 -14   2    0.80    0.32
   7 -14  -2    0.18    0.34
  -7 -14   2    0.54    0.29
  -7  14   2    0.08    0.30
   7  14  -2    0.16    0.27
   7  14  -2    0.29    0.39
  -7  14   2   -0.25    0.30
  -6 -14   2    2.09    0.43
   6 -14  -2    2.58    0.41
   6 -14  -2    3.01    0.54
  -6 -14   2    1.81    0.38
  -6 -14   2    1.71    0.39
   6  14  -2    3.01    0.58
  -6  14   2    2.05    0.42
   6  14  -2    1.90    0.43
  -6  14   2    1.41    0.44
  -5 -14   2    0.76    0.30
   5 -14  -2    0.99    0.28
   5 -14  -2    1.11    0.36
  -5 -14   2    1.09    0.28
  -5 -14   2    0.63    0.31
   5 -14  -2    1.07    0.24
  -5  14   2    1.14    0.30
   5  14  -2    0.70    0.34
  -5  14   2    0.88    0.38
   5  14  -2    0.44    0.36
  -4 -14   2    0.66    0.28
   4 -14  -2    0.73    0.32
   4 -14  -2    1.07    0.27
   4 -14  -2    0.70    0.22
  -4 -14   2    1.24    0.28
   4  14  -2    0.62    0.31
  -4  14   2    0.57    0.31
   4  14  -2    1.16    0.41
  -4  14   2    0.89    0.26
   4  14  -2    0.75    0.29
   3 -14  -2   13.90    0.65
  -3 -14   2   11.89    0.70
   3 -14  -2   11.76    0.74
  -3 -14   2   12.36    0.69
   3 -14  -2   11.02    0.60
  -3 -14   2   12.14    0.59
  -3 -14   2   11.76    0.71
   3  14  -2   13.53    0.75
  -3  14   2   12.35    0.58
  -3  14   2   12.61    0.79
   3  14  -2   10.19    0.78
  -2 -14   2    3.18    0.42
   2 -14  -2    2.02    0.42
  -2 -14   2    2.83    0.41
   2 -14  -2    3.18    0.35
  -2 -14   2    2.86    0.32
   2 -14  -2    2.90    0.37
  -2 -14   2    2.56    0.37
   2  14  -2    3.34    0.50
   2  14  -2    3.03    0.44
  -2  14   2    2.38    0.44
  -2  14   2    3.29    0.51
  -2  14   2    3.09    0.30
  -1 -14   2    5.60    0.34
  -1 -14   2    5.11    0.50
   1 -14  -2    4.96    0.40
   1 -14  -2    5.42    0.42
   1 -14  -2    5.10    0.32
  -1 -14   2    4.55    0.47
   1 -14  -2    5.46    0.56
  -1 -14   2    4.19    0.48
  -1  14   2    5.28    0.58
   1  14  -2    4.93    0.61
  -1  14   2    4.24    0.57
   1  14  -2    5.47    0.59
   0 -14  -2    0.24    0.22
   0 -14  -2    0.01    0.16
   0 -14  -2    0.03    0.18
   0 -14   2    0.36    0.13
   0 -14   2   -0.07    0.19
   0 -14  -2    0.22    0.13
   0 -14   2    0.23    0.19
   0 -14   2    0.16    0.20
   0  14  -2    0.55    0.24
   0  14  -2    0.04    0.25
   0  14   2    0.46    0.26
   0  14   2   -0.11    0.22
  -1 -14  -2    0.50    0.18
   1 -14   2    0.47    0.22
  -1 -14  -2    0.76    0.21
  -1 -14  -2    0.92    0.26
   1 -14   2    0.47    0.27
  -1 -14  -2    0.94    0.32
   1 -14   2    0.81    0.26
   1  14   2    0.64    0.26
  -1  14  -2    0.70    0.29
  -1  14  -2    0.26    0.25
   1  14   2    0.98    0.32
  -2 -14  -2    5.55    0.58
  -2 -14  -2    4.51    0.48
  -2 -14  -2    5.07    0.46
  -2 -14  -2    4.69    0.38
   2 -14   2    5.75    0.59
   2 -14   2    6.38    0.51
   2 -14   2    4.81    0.46
  -2  14  -2    4.55    0.37
  -2  14  -2    5.86    0.65
   2  14   2    6.00    0.52
  -2  14  -2    4.52    0.57
   2  14   2    5.47    0.63
  -3 -14  -2    1.52    0.30
   3 -14   2    1.96    0.32
  -3 -14  -2    1.42    0.28
   3 -14   2    2.10    0.37
  -3 -14  -2    1.48    0.31
  -3 -14  -2    1.82    0.38
   3 -14   2    2.15    0.41
   3  14   2    1.45    0.30
   3  14   2    1.95    0.44
  -3  14  -2    1.51    0.31
  -3  14  -2    1.01    0.34
  -3  14  -2    1.12    0.35
   3  14   2    2.35    0.46
  -3  14  -2    2.02    0.28
  -4 -14  -2    4.73    0.49
   4 -14   2    5.80    0.58
   4 -14   2    5.51    0.63
  -4 -14  -2    5.66    0.53
  -4 -14  -2    6.60    0.54
   4 -14   2    4.98    0.49
  -4  14  -2    5.17    0.64
  -4  14  -2    4.94    0.65
   4  14   2    5.28    0.64
  -4  14  -2    6.50    0.51
   4  14   2    4.85    0.65
  -4  14  -2    5.33    0.44
   5 -14   2   13.20    0.68
  -5 -14  -2   12.55    0.75
  -5 -14  -2   12.26    0.72
   5 -14   2   13.94    0.83
   5 -14   2   10.63    0.80
  -5 -14  -2   12.07    0.74
  -5  14  -2   11.75    0.66
  -5  14  -2   12.11    0.74
   5  14   2   11.93    0.87
  -5  14  -2   13.22    0.89
   5  14   2   11.35    0.87
  -6 -14  -2    0.07    0.28
  -6 -14  -2    0.28    0.24
   6 -14   2    0.17    0.31
  -6 -14  -2    0.62    0.29
   6 -14   2    0.71    0.39
   6 -14   2    0.30    0.23
  -6  14  -2    0.03    0.23
   6  14   2    0.23    0.29
  -6  14  -2    0.59    0.35
   6  14   2    0.27    0.34
  -6  14  -2    0.30    0.35
  -7 -14  -2    2.05    0.48
   7 -14   2    1.25    0.47
  -7 -14  -2    2.41    0.46
  -7 -14  -2    1.23    0.34
   7 -14   2    1.77    0.45
   7  14   2    1.46    0.53
  -7  14  -2    2.52    0.54
   7  14   2    1.20    0.47
  -7  14  -2    1.84    0.38
  -7  14  -2    1.38    0.47
   8 -14   2    1.69    0.52
   8 -14   2    0.43    0.41
  -8 -14  -2    0.87    0.37
  -8 -14  -2    1.27    0.43
  -8 -14  -2    0.55    0.32
  -8  14  -2    1.61    0.56
   8  14   2    1.06    0.44
  -8  14  -2    1.95    0.56
  -8  14  -2    0.64    0.33
   8  14   2    2.04    0.62
  -9 -14  -2    0.42    0.36
  -9 -14  -2    0.58    0.41
   9 -14   2    1.50    0.57
  -9 -14  -2    1.31    0.53
   9 -14   2    0.59    0.45
   9  14   2    1.23    0.63
  -9  14  -2    0.82    0.53
  -9  14  -2    0.67    0.44
   9  14   2    0.67    0.52
  -9  14  -2    0.01    0.51
   9 -15  -2    2.99    0.57
  -9 -15   2    2.20    0.47
   9 -15  -2    1.91    0.53
  -9  15   2    2.09    0.67
   9  15  -2    2.97    0.65
   9  15  -2    3.79    0.79
  -9  15   2    4.40    0.68
  -8 -15   2    1.75    0.53
   8 -15  -2    2.79    0.62
  -8 -15   2    1.41    0.43
   8 -15  -2    2.12    0.48
  -8 -15   2    1.86    0.42
   8  15  -2    3.00    0.60
   8  15  -2    2.63    0.66
  -8  15   2    2.33    0.65
  -8  15   2    2.79    0.55
   7 -15  -2    0.76    0.39
  -7 -15   2    0.73    0.37
  -7 -15   2    0.70    0.33
   7 -15  -2    0.36    0.29
  -7 -15   2    0.05    0.26
  -7  15   2    0.78    0.42
   7  15  -2    1.24    0.51
   7  15  -2    0.30    0.30
  -7  15   2    1.04    0.41
   6 -15  -2   -0.03    0.24
  -6 -15   2   -0.33    0.29
  -6 -15   2   -0.35    0.21
   6 -15  -2    0.29    0.34
  -6 -15   2    0.41    0.31
   6  15  -2   -0.36    0.29
  -6  15   2    0.63    0.39
  -6  15   2   -0.02    0.28
   6  15  -2    0.02    0.28
  -5 -15   2    0.68    0.30
  -5 -15   2    0.38    0.21
   5 -15  -2   -0.03    0.22
  -5 -15   2    0.48    0.30
   5 -15  -2    0.98    0.38
   5 -15  -2    0.46    0.22
  -5  15   2    1.12    0.31
  -5  15   2    0.48    0.35
   5  15  -2    0.65    0.36
   5  15  -2    0.75    0.40
  -4 -15   2    2.70    0.46
  -4 -15   2    2.39    0.42
   4 -15  -2    3.27    0.50
   4 -15  -2    3.17    0.40
  -4 -15   2    2.32    0.35
   4 -15  -2    2.73    0.35
   4  15  -2    1.95    0.48
  -4  15   2    2.48    0.52
   4  15  -2    2.92    0.45
   4  15  -2    2.28    0.44
  -4  15   2    2.83    0.38
  -3 -15   2    2.42    0.40
  -3 -15   2    1.94    0.30
   3 -15  -2    2.43    0.35
   3 -15  -2    2.41    0.35
   3 -15  -2    2.24    0.44
  -3 -15   2    2.79    0.42
  -3 -15   2    2.06    0.36
  -3  15   2    1.58    0.43
   3  15  -2    2.43    0.49
  -3  15   2    2.35    0.49
   3  15  -2    2.28    0.42
  -2 -15   2    5.71    0.39
   2 -15  -2    5.35    0.44
  -2 -15   2    6.10    0.58
  -2 -15   2    4.86    0.54
   2 -15  -2    5.17    0.48
   2 -15  -2    5.01    0.57
  -2 -15   2    5.26    0.54
  -2  15   2    6.06    0.69
  -2  15   2    5.24    0.62
   2  15  -2    6.47    0.65
   2  15  -2    5.74    0.68
  -1 -15   2   17.44    0.65
  -1 -15   2   16.35    0.85
   1 -15  -2   15.96    0.88
   1 -15  -2   15.75    0.76
  -1 -15   2   18.36    0.86
   1 -15  -2   16.98    0.74
  -1 -15   2   16.05    0.82
  -1  15   2   16.14    0.87
   1  15  -2   14.84    0.92
  -1  15   2   17.40    0.99
   1  15  -2   17.01    0.89
   0 -15  -2    0.46    0.17
   0 -15   2    0.19    0.13
   0 -15  -2    0.14    0.18
   0 -15   2    0.26    0.20
   0 -15   2    0.04    0.24
   0 -15  -2    0.23    0.23
   0 -15   2    0.24    0.23
   0  15  -2    0.24    0.27
   0  15  -2    0.04    0.26
   0  15   2    0.29    0.23
   0  15   2    0.43    0.28
  -1 -15  -2    0.41    0.25
   1 -15   2    0.45    0.25
   1 -15   2    0.18    0.20
   1 -15   2   -0.03    0.24
  -1 -15  -2    0.23    0.19
  -1 -15  -2    0.16    0.17
  -1 -15  -2    0.36    0.23
   1  15   2   -0.02    0.20
  -1  15  -2    0.42    0.31
  -1  15  -2    0.38    0.29
   1  15   2    0.25    0.29
  -2 -15  -2    0.11    0.16
   2 -15   2    0.17    0.23
   2 -15   2    0.00    0.18
  -2 -15  -2    0.29    0.22
  -2 -15  -2   -0.01    0.19
   2 -15   2   -0.25    0.23
  -2 -15  -2   -0.11    0.18
   2  15   2   -0.29    0.22
  -2  15  -2   -0.50    0.19
  -2  15  -2    0.03    0.27
   2  15   2   -0.06    0.28
  -3 -15  -2    1.60    0.37
   3 -15   2    2.02    0.42
  -3 -15  -2    1.94    0.35
   3 -15   2    1.77    0.37
  -3 -15  -2    1.98    0.31
   3 -15   2    2.26    0.36
  -3 -15  -2    1.86    0.40
  -3  15  -2    2.41    0.47
   3  15   2    1.43    0.38
   3  15   2    1.38    0.42
  -3  15  -2    2.23    0.45
  -4 -15  -2    1.52    0.32
   4 -15   2    1.32    0.31
  -4 -15  -2    1.66    0.37
  -4 -15  -2    1.34    0.30
   4 -15   2    1.56    0.36
   4  15   2    0.95    0.41
  -4  15  -2    1.00    0.27
  -4  15  -2    0.94    0.41
   4  15   2    1.20    0.39
  -4  15  -2    1.51    0.36
  -4  15  -2    0.90    0.39
   5 -15   2    0.00    0.21
   5 -15   2    0.06    0.27
  -5 -15  -2    0.18    0.24
  -5 -15  -2    0.05    0.22
   5 -15   2   -0.07    0.23
  -5 -15  -2    0.22    0.26
  -5  15  -2    0.19    0.23
  -5  15  -2   -0.10    0.32
   5  15   2    0.05    0.30
  -5  15  -2    0.13    0.28
   5  15   2    0.31    0.30
  -6 -15  -2   11.41    0.77
  -6 -15  -2   11.72    0.78
   6 -15   2   10.54    0.64
   6 -15   2   11.45    0.85
  -6 -15  -2   11.57    0.79
   6 -15   2   12.01    0.93
  -6  15  -2   10.70    0.79
  -6  15  -2    9.11    0.95
  -6  15  -2   11.79    0.72
   6  15   2   10.39    0.83
   6  15   2    9.93    0.99
  -7 -15  -2    0.22    0.31
  -7 -15  -2    0.48    0.28
  -7 -15  -2    0.35    0.37
   7 -15   2    0.25    0.34
   7 -15   2    0.69    0.39
  -7  15  -2   -0.14    0.27
  -7  15  -2    0.11    0.38
   7  15   2   -0.44    0.34
  -7  15  -2   -0.05    0.35
   7  15   2   -0.90    0.40
   8 -15   2   -0.03    0.36
  -8 -15  -2    0.14    0.40
  -8 -15  -2    0.27    0.35
   8 -15   2    0.00    0.39
  -8 -15  -2   -0.31    0.28
  -8  15  -2    0.04    0.45
   8  15   2    0.39    0.41
  -8  15  -2    0.50    0.38
  -8  15  -2   -0.44    0.38
   8  15   2   -0.39    0.32
   8 -16  -2    1.78    0.48
  -8 -16   2    1.22    0.44
  -8 -16   2    0.26    0.49
  -8 -16   2    1.16    0.39
   8  16  -2    1.32    0.51
  -8  16   2    0.82    0.52
   8  16  -2    1.15    0.54
  -8  16   2    1.15    0.45
   7 -16  -2    0.57    0.34
   7 -16  -2   -0.34    0.36
  -7 -16   2    0.66    0.39
  -7 -16   2   -0.06    0.25
  -7 -16   2    0.39    0.36
  -7  16   2    0.97    0.38
   7  16  -2   -0.09    0.37
  -7  16   2   -0.26    0.36
   7  16  -2    0.21    0.38
  -6 -16   2    0.05    0.32
  -6 -16   2   -0.08    0.28
   6 -16  -2    0.14    0.33
  -6 -16   2   -0.06    0.24
   6 -16  -2    0.18    0.28
   6  16  -2    0.03    0.38
  -6  16   2   -0.15    0.30
  -6  16   2   -0.11    0.31
   6  16  -2   -0.06    0.32
   5 -16  -2   -0.04    0.28
   5 -16  -2   -0.04    0.21
   5 -16  -2   -0.50    0.22
  -5 -16   2   -0.47    0.21
  -5 -16   2   -0.18    0.19
  -5 -16   2    0.34    0.30
   5  16  -2   -0.06    0.34
  -5  16   2    0.06    0.32
   5  16  -2   -0.04    0.31
  -4 -16   2    2.40    0.37
  -4 -16   2    2.50    0.43
   4 -16  -2    2.13    0.38
   4 -16  -2    2.84    0.39
  -4 -16   2    2.24    0.46
   4 -16  -2    1.84    0.43
   4  16  -2    2.69    0.48
   4  16  -2    2.65    0.56
  -4  16   2    2.88    0.53
   4  16  -2    2.56    0.44
  -3 -16   2    0.59    0.29
   3 -16  -2    1.22    0.29
  -3 -16   2    0.86    0.32
  -3 -16   2    0.94    0.26
   3 -16  -2    1.54    0.31
   3 -16  -2    0.63    0.34
  -3 -16   2    1.04    0.33
  -3  16   2    0.57    0.34
   3  16  -2    0.93    0.40
   3  16  -2    0.79    0.35
  -3  16   2    0.77    0.38
  -2 -16   2    0.47    0.20
  -2 -16   2    0.32    0.23
   2 -16  -2    0.44    0.28
   2 -16  -2    0.42    0.23
  -2 -16   2    0.65    0.30
   2 -16  -2    0.40    0.24
  -2 -16   2    0.55    0.29
   2  16  -2    0.29    0.26
  -2  16   2    0.91    0.34
   2  16  -2    0.62    0.32
  -2  16   2    0.21    0.28
  -1 -16   2    2.87    0.43
  -1 -16   2    2.24    0.40
   1 -16  -2    2.29    0.37
   1 -16  -2    2.23    0.43
  -1 -16   2    2.02    0.36
   1 -16  -2    1.87    0.32
  -1 -16   2    2.41    0.28
  -1  16   2    2.76    0.51
   1  16  -2    2.21    0.47
   1  16  -2    2.86    0.46
  -1  16   2    2.70    0.46
   0 -16  -2    0.68    0.29
   0 -16  -2   -0.09    0.18
   0 -16   2    0.00    0.19
   0 -16  -2    0.06    0.18
   0 -16   2    0.08    0.23
   0 -16   2   -0.16    0.23
   0  16  -2   -0.18    0.26
   0  16   2    0.15    0.26
   0  16  -2   -0.08    0.25
   0  16   2    0.09    0.27
  -1 -16  -2   -0.46    0.22
  -1 -16  -2    0.34    0.17
   1 -16   2   -0.05    0.22
   1 -16   2    0.06    0.20
  -1 -16  -2   -0.12    0.20
  -1 -16  -2   -0.09    0.17
   1 -16   2    0.25    0.23
   1  16   2    0.31    0.28
   1  16   2    0.48    0.34
  -1  16  -2    0.38    0.35
  -1  16  -2   -0.17    0.28
   2 -16   2    1.74    0.43
   2 -16   2    1.84    0.37
   2 -16   2    1.96    0.35
  -2 -16  -2    2.33    0.45
  -2 -16  -2    1.28    0.26
  -2 -16  -2    1.82    0.34
  -2 -16  -2    1.45    0.33
  -2  16  -2    2.28    0.51
  -2  16  -2    1.57    0.43
   2  16   2    1.56    0.43
   2  16   2    2.67    0.40
  -3 -16  -2    0.23    0.25
  -3 -16  -2    0.46    0.30
   3 -16   2    0.45    0.25
  -3 -16  -2   -0.18    0.21
   3 -16   2    0.33    0.29
  -3 -16  -2    0.19    0.20
   3 -16   2    0.38    0.27
  -3  16  -2   -0.35    0.32
  -3  16  -2    0.13    0.28
   3  16   2    0.17    0.29
   3  16   2    0.22    0.33
  -4 -16  -2   -0.07    0.27
   4 -16   2    0.08    0.19
   4 -16   2   -0.21    0.23
  -4 -16  -2   -0.16    0.21
  -4 -16  -2    0.08    0.25
   4 -16   2   -0.34    0.25
  -4  16  -2   -0.12    0.28
  -4  16  -2   -0.14    0.24
   4  16   2   -0.22    0.29
   4  16   2   -0.36    0.30
  -5 -16  -2    1.55    0.39
  -5 -16  -2    1.66    0.39
   5 -16   2    1.34    0.32
   5 -16   2    0.87    0.36
  -5 -16  -2    1.49    0.37
  -5  16  -2    1.87    0.54
  -5  16  -2    1.03    0.43
   5  16   2    0.85    0.38
   5  16   2    1.40    0.51
  -6 -16  -2   -0.10    0.29
   6 -16   2    0.01    0.33
  -6 -16  -2   -0.44    0.23
  -6 -16  -2   -0.13    0.29
   6 -16   2    0.53    0.37
   6 -16   2    0.29    0.25
  -6  16  -2    0.21    0.41
   6  16   2    0.10    0.36
   6  16   2    0.63    0.37
  -6  16  -2    0.30    0.37
  -6  16  -2    0.42    0.29
  -7 -16  -2   -0.25    0.29
  -7 -16  -2    0.13    0.40
  -7 -16  -2   -0.17    0.28
   7 -16   2    0.33    0.41
   7 -16   2   -0.13    0.37
   7  16   2   -0.09    0.32
   7  16   2   -0.49    0.41
  -7  16  -2    0.32    0.37
  -7  16  -2    0.09    0.32
  -7  16  -2    0.09    0.43
   8 -16   2    1.27    0.52
  -8 -16  -2    1.29    0.44
   8 -16   2    0.59    0.53
  -8 -16  -2    1.72    0.49
  -8 -16  -2    0.21    0.44
   8  16   2    1.34    0.55
  -8  16  -2    1.83    0.52
   8  16   2    2.63    0.68
  -8  16  -2    1.84    0.45
  -8  16  -2    1.01    0.53
  -7 -17   2   -0.22    0.29
   7 -17  -2    0.53    0.36
  -7 -17   2    0.14    0.33
  -7 -17   2    0.39    0.39
   7 -17  -2    0.03    0.39
  -7  17   2    0.04    0.38
   7  17  -2    0.87    0.45
   7  17  -2    0.20    0.44
  -6 -17   2    6.69    0.65
  -6 -17   2    7.44    0.75
   6 -17  -2    5.61    0.76
  -6 -17   2    8.44    0.80
   6 -17  -2    6.42    0.68
   6  17  -2    6.15    0.74
  -6  17   2    6.66    0.86
   6  17  -2    5.75    0.92
  -5 -17   2    1.13    0.33
  -5 -17   2    0.80    0.40
   5 -17  -2    0.83    0.27
   5 -17  -2    0.29    0.30
  -5 -17   2    1.40    0.40
   5 -17  -2    0.84    0.39
  -5  17   2    0.56    0.38
   5  17  -2    0.33    0.39
   5  17  -2    0.51    0.37
   4 -17  -2    0.46    0.35
   4 -17  -2    0.12    0.25
   4 -17  -2   -0.09    0.20
  -4 -17   2   -0.18    0.29
  -4 -17   2    0.12    0.22
  -4  17   2   -0.12    0.31
   4  17  -2    0.09    0.34
   4  17  -2   -0.16    0.25
  -4  17   2   -0.10    0.30
  -3 -17   2    1.22    0.37
   3 -17  -2    0.70    0.29
   3 -17  -2    0.43    0.25
  -3 -17   2    1.16    0.38
  -3 -17   2    1.24    0.28
   3 -17  -2    0.77    0.35
  -3 -17   2    0.78    0.31
   3  17  -2    1.37    0.48
   3  17  -2    0.76    0.37
  -3  17   2    0.68    0.36
  -3  17   2    1.26    0.41
   2 -17  -2    5.15    0.67
   2 -17  -2    4.39    0.50
  -2 -17   2    3.47    0.52
  -2 -17   2    3.74    0.51
  -2 -17   2    3.90    0.40
   2 -17  -2    3.54    0.44
  -2 -17   2    3.42    0.51
   2  17  -2    3.71    0.65
  -2  17   2    3.99    0.57
   2  17  -2    4.92    0.62
  -2  17   2    2.47    0.53
  -1 -17   2    4.53    0.55
   1 -17  -2    4.37    0.58
   1 -17  -2    4.72    0.49
  -1 -17   2    4.21    0.57
  -1 -17   2    4.43    0.52
  -1  17   2    4.50    0.61
  -1  17   2    3.26    0.58
   1  17  -2    3.10    0.53
   1  17  -2    3.20    0.60
   0 -17  -2    0.56    0.28
   0 -17  -2    1.09    0.30
   0 -17  -2    1.38    0.37
   0 -17   2    1.03    0.32
   0 -17   2    0.83    0.34
   0 -17   2    1.01    0.33
   0  17   2    0.77    0.35
   0  17   2    0.56    0.33
   0  17  -2    1.15    0.39
   0  17  -2    1.54    0.44
   1 -17   2    0.73    0.32
   1 -17   2    0.33    0.29
   1 -17   2    0.36    0.27
  -1 -17  -2    0.64    0.29
  -1 -17  -2   -0.21    0.22
  -1 -17  -2    0.37    0.24
  -1  17  -2    0.16    0.32
   1  17   2   -0.43    0.26
   1  17   2    0.35    0.31
  -1  17  -2    0.79    0.34
   2 -17   2    0.75    0.32
  -2 -17  -2    0.27    0.25
   2 -17   2    0.26    0.32
  -2 -17  -2    0.30    0.26
  -2 -17  -2    0.12    0.20
   2 -17   2    0.21    0.26
  -2 -17  -2    0.53    0.32
  -2  17  -2    0.54    0.40
   2  17   2    0.23    0.35
  -2  17  -2    0.49    0.32
   2  17   2    0.48    0.31
  -3 -17  -2   -0.16    0.29
  -3 -17  -2    0.05    0.20
  -3 -17  -2    0.02    0.26
   3 -17   2    0.83    0.33
  -3 -17  -2   -0.16    0.24
   3 -17   2    0.02    0.23
   3 -17   2   -0.08    0.30
   3  17   2    0.46    0.34
  -3  17  -2    0.08    0.35
  -3  17  -2    0.54    0.37
   3  17   2    0.65    0.38
  -4 -17  -2    2.01    0.43
   4 -17   2    1.85    0.43
   4 -17   2    2.01    0.37
  -4 -17  -2    1.25    0.35
  -4 -17  -2    3.15    0.43
   4 -17   2    2.81    0.52
   4  17   2    1.48    0.45
  -4  17  -2    2.04    0.54
  -4  17  -2    1.96    0.49
   4  17   2    1.27    0.48
  -5 -17  -2   -0.23    0.24
   5 -17   2    0.27    0.34
  -5 -17  -2    0.20    0.28
  -5 -17  -2   -0.16    0.27
   5 -17   2   -0.25    0.23
   5 -17   2   -0.30    0.30
  -5  17  -2    0.30    0.39
   5  17   2    0.09    0.41
   5  17   2    0.17    0.32
  -5  17  -2    0.49    0.41
   6 -17   2   -0.04    0.33
  -6 -17  -2   -0.34    0.30
  -6 -17  -2    0.09    0.32
   6 -17   2   -0.18    0.25
  -6 -17  -2    0.07    0.30
   6  17   2    0.16    0.41
   6  17   2    0.39    0.37
  -6  17  -2    0.89    0.45
  -6  17  -2    0.36    0.37
   7 -17   2   -0.41    0.38
  -7 -17  -2   -0.25    0.31
   7 -17   2   -0.19    0.31
  -7 -17  -2    0.00    0.29
  -7 -17  -2   -0.03    0.39
  -7  17  -2   -0.20    0.36
   7  17   2    0.23    0.35
  -7  17  -2    0.22    0.43
   7  17   2    0.62    0.56
  -7 -18   2   -0.04    0.30
   7 -18  -2    0.39    0.41
   7 -18  -2   -0.04    0.35
  -7 -18   2    0.58    0.42
  -7 -18   2   -0.11    0.39
   7  18  -2    0.28    0.43
   7  18  -2   -0.46    0.52
  -7  18   2    0.64    0.49
  -6 -18   2    6.99    0.70
   6 -18  -2    8.75    0.94
  -6 -18   2   11.06    0.97
  -6 -18   2    9.12    0.83
   6 -18  -2    9.71    0.85
   6  18  -2    9.04    0.91
   6  18  -2    9.13    1.08
  -6  18   2    8.45    0.99
   5 -18  -2    0.28    0.35
  -5 -18   2    0.09    0.34
  -5 -18   2   -0.24    0.18
  -5 -18   2   -0.20    0.30
   5 -18  -2    0.43    0.32
   5  18  -2   -0.34    0.30
   5  18  -2   -0.07    0.39
  -5  18   2   -0.11    0.37
  -5  18   2    0.02    0.35
   4 -18  -2   -0.44    0.24
  -4 -18   2   -0.31    0.25
  -4 -18   2   -0.05    0.20
   4 -18  -2   -0.50    0.26
   4 -18  -2    0.26    0.29
  -4  18   2    0.63    0.37
   4  18  -2   -0.20    0.31
   4  18  -2   -0.32    0.33
  -4  18   2    0.23    0.36
   3 -18  -2    0.10    0.27
   3 -18  -2   -0.17    0.21
  -3 -18   2   -0.15    0.30
   3 -18  -2    0.02    0.24
  -3 -18   2   -0.11    0.27
  -3 -18   2    0.33    0.31
  -3 -18   2    0.15    0.21
   3  18  -2   -0.81    0.31
  -3  18   2    0.03    0.35
  -3  18   2    0.32    0.36
   3  18  -2   -0.20    0.33
  -2 -18   2   19.83    1.03
   2 -18  -2   22.49    0.98
  -2 -18   2   19.74    1.06
   2 -18  -2   19.07    1.10
  -2 -18   2   18.91    0.99
   2  18  -2   19.62    1.10
  -2  18   2   21.51    1.22
   2  18  -2   19.23    1.19
  -2  18   2   20.91    1.15
   1 -18  -2   -0.16    0.21
  -1 -18   2    0.06    0.26
  -1 -18   2    0.12    0.28
   1 -18  -2    0.03    0.31
   1 -18  -2   -0.05    0.23
  -1 -18   2   -0.24    0.28
   1  18  -2    0.20    0.33
  -1  18   2    0.22    0.30
   1  18  -2   -0.68    0.31
  -1  18   2   -0.33    0.29
   0 -18  -2    1.23    0.34
   0 -18   2    2.04    0.43
   0 -18  -2    1.88    0.38
   0 -18   2    2.10    0.47
   0 -18  -2    1.89    0.48
   0 -18   2    1.98    0.39
   0  18  -2    1.67    0.48
   0  18   2    2.06    0.44
   0  18  -2    2.28    0.50
   0  18   2    2.43    0.52
   1 -18   2   12.39    0.87
  -1 -18  -2   11.96    0.74
   1 -18   2   11.92    0.78
   1 -18   2   11.69    0.80
  -1 -18  -2   11.66    0.79
  -1 -18  -2   11.67    0.83
   1  18   2   10.82    0.90
  -1  18  -2   13.27    0.93
   1  18   2   13.17    0.84
  -1  18  -2   12.91    0.93
  -2 -18  -2    0.31    0.30
   2 -18   2    0.08    0.31
  -2 -18  -2    0.20    0.27
   2 -18   2   -0.24    0.18
  -2 -18  -2    0.13    0.29
   2 -18   2    0.15    0.28
  -2 -18  -2    0.07    0.21
  -2  18  -2    0.47    0.33
   2  18   2   -0.49    0.32
  -2  18  -2    0.50    0.41
   3 -18   2    0.41    0.37
  -3 -18  -2    0.19    0.26
  -3 -18  -2    0.57    0.35
  -3 -18  -2    0.03    0.32
  -3 -18  -2    0.08    0.28
   3 -18   2    0.67    0.35
   3 -18   2    0.17    0.23
   3  18   2    0.51    0.38
  -3  18  -2    0.11    0.37
  -3  18  -2    0.11    0.29
   3  18   2    0.00    0.32
  -4 -18  -2    1.98    0.42
   4 -18   2    2.56    0.50
   4 -18   2    2.15    0.50
   4 -18   2    1.33    0.35
  -4 -18  -2    1.18    0.40
  -4 -18  -2    2.84    0.45
  -4  18  -2    1.67    0.51
  -4  18  -2    1.87    0.55
   4  18   2    1.81    0.53
   4  18   2    1.93    0.55
  -5 -18  -2   10.02    0.80
   5 -18   2    7.47    0.79
   5 -18   2    9.88    0.97
   5 -18   2    9.07    0.67
  -5 -18  -2   10.64    0.75
  -5 -18  -2   10.96    0.80
  -5  18  -2    7.00    0.90
   5  18   2   10.88    1.05
  -5  18  -2    8.87    0.96
   5  18   2   11.05    1.14
  -6 -18  -2    0.35    0.38
   6 -18   2    1.72    0.53
   6 -18   2    0.94    0.46
  -6 -18  -2    1.08    0.41
  -6 -18  -2    1.71    0.43
  -6  18  -2    0.56    0.47
   6  18   2    1.24    0.53
   6  18   2    1.09    0.50
  -6  18  -2   -0.05    0.50
   6 -19  -2    0.24    0.40
  -6 -19   2    0.48    0.40
  -6 -19   2    0.07    0.30
  -6 -19   2    0.75    0.41
   6 -19  -2   -0.58    0.32
   6  19  -2    0.15    0.40
  -6  19   2    0.25    0.44
   6  19  -2   -0.03    0.42
  -6  19   2    0.12    0.42
  -5 -19   2    0.62    0.37
  -5 -19   2    0.63    0.37
   5 -19  -2    0.13    0.39
   5 -19  -2   -0.09    0.30
  -5 -19   2    0.10    0.28
   5  19  -2    0.31    0.44
  -5  19   2   -0.05    0.38
   5  19  -2   -0.10    0.39
  -5  19   2    0.44    0.46
  -4 -19   2   -0.18    0.33
   4 -19  -2   -0.29    0.26
  -4 -19   2    0.39    0.25
   4 -19  -2   -0.12    0.34
  -4  19   2    0.15    0.38
   4  19  -2    0.05    0.36
  -4  19   2    0.24    0.39
   4  19  -2    0.32    0.40
  -3 -19   2    0.69    0.26
  -3 -19   2    0.90    0.39
  -3 -19   2    0.45    0.33
   3 -19  -2    0.60    0.31
   3 -19  -2    1.01    0.40
  -3 -19   2    1.02    0.39
   3  19  -2    0.54    0.40
  -3  19   2    0.16    0.34
  -3  19   2    1.36    0.48
   3  19  -2    0.41    0.44
   2 -19  -2   -0.13    0.27
  -2 -19   2    0.27    0.27
  -2 -19   2   -0.04    0.29
   2 -19  -2   -0.25    0.24
  -2 -19   2   -0.57    0.27
   2 -19  -2   -0.02    0.22
   2  19  -2    0.43    0.43
  -2  19   2    0.19    0.34
   2  19  -2    0.02    0.33
  -2  19   2    0.06    0.38
  -1 -19   2    7.76    0.75
   1 -19  -2    8.55    0.87
   1 -19  -2    7.81    0.65
  -1 -19   2    8.80    0.69
   1 -19  -2    8.97    0.70
  -1 -19   2    8.97    0.87
   1  19  -2    9.66    0.91
   1  19  -2    7.59    0.93
  -1  19   2    7.46    0.89
  -1  19   2    9.24    0.89
   0 -19   2   -0.02    0.25
   0 -19   2   -0.32    0.25
   0 -19  -2    0.10    0.26
   0 -19  -2    0.21    0.26
   0 -19   2    0.26    0.31
   0 -19  -2   -0.46    0.27
   0  19  -2   -0.28    0.28
   0  19  -2   -0.02    0.35
   0  19   2    0.45    0.39
   0  19   2    0.15    0.35
  -1 -19  -2    6.29    0.72
  -1 -19  -2    5.00    0.56
   1 -19   2    4.52    0.62
   1 -19   2    5.54    0.63
   1 -19   2    5.07    0.61
  -1 -19  -2    5.50    0.64
  -1  19  -2    4.76    0.72
   1  19   2    4.47    0.66
  -1  19  -2    4.10    0.68
   1  19   2    5.83    0.79
  -2 -19  -2    1.95    0.41
   2 -19   2    2.63    0.45
   2 -19   2    1.77    0.43
  -2 -19  -2    1.87    0.47
  -2 -19  -2    2.00    0.42
   2 -19   2    1.46    0.43
   2  19   2    0.98    0.47
  -2  19  -2    1.30    0.47
  -2  19  -2    1.58    0.48
  -3 -19  -2    0.56    0.34
   3 -19   2    0.47    0.44
  -3 -19  -2    0.26    0.27
   3 -19   2    0.06    0.28
   3 -19   2    0.47    0.38
  -3 -19  -2    0.89    0.38
  -3 -19  -2    0.17    0.32
  -3  19  -2    0.24    0.44
   3  19   2    0.56    0.39
   3  19   2    0.95    0.47
  -3  19  -2    0.56    0.38
  -4 -19  -2    0.88    0.36
   4 -19   2    0.66    0.40
   4 -19   2    0.26    0.28
  -4 -19  -2    0.56    0.36
   4 -19   2    0.95    0.45
  -4 -19  -2    0.55    0.33
   4  19   2    0.39    0.42
  -4  19  -2    0.68    0.42
  -4  19  -2    0.77    0.50
   4  19   2    1.24    0.51
  -5 -19  -2    7.38    0.83
   5 -19   2   10.49    0.86
  -5 -19  -2    7.00    0.74
   5 -19   2    7.43    0.69
  -5 -19  -2    8.78    0.69
   5 -19   2    7.82    0.89
  -5  19  -2    7.81    0.98
   5  19   2    7.18    0.92
   5  19   2   10.59    1.12
  -5  19  -2    6.34    0.85
   6 -19   2    0.88    0.46
  -6 -19  -2    0.85    0.42
  -6  19  -2    0.49    0.51
  -6  19  -2    0.85    0.48
   6  19   2    0.46    0.43
   6  19   2    0.72    0.53
   5 -20  -2    0.89    0.52
  -5 -20   2    0.39    0.40
  -5 -20   2    1.16    0.35
  -5 -20   2    0.60    0.41
   5 -20  -2    0.66    0.38
  -5  20   2    0.68    0.45
  -5  20   2    0.64    0.44
   5  20  -2    1.13    0.58
   5  20  -2    0.63    0.44
   4 -20  -2    0.03    0.30
  -4 -20   2   -0.19    0.25
   4 -20  -2    0.26    0.36
   4 -20  -2   -0.15    0.28
  -4 -20   2    0.44    0.35
  -4  20   2   -0.15    0.41
   4  20  -2    0.19    0.40
   4  20  -2    0.83    0.49
  -4  20   2   -0.30    0.43
  -3 -20   2    1.63    0.50
   3 -20  -2    1.79    0.41
   3 -20  -2    0.97    0.45
   3 -20  -2    1.41    0.41
  -3 -20   2    1.58    0.46
   3  20  -2    0.96    0.49
  -3  20   2    1.74    0.61
  -3  20   2    1.58    0.55
  -2 -20   2    1.30    0.44
   2 -20  -2    0.47    0.29
   2 -20  -2    1.10    0.34
   2 -20  -2    0.96    0.42
  -2 -20   2    0.94    0.41
  -2 -20   2    0.83    0.36
   2  20  -2    0.81    0.49
  -2  20   2    0.41    0.42
   2  20  -2    0.67    0.47
  -2  20   2    1.46    0.49
  -1 -20   2    0.07    0.27
  -1 -20   2    0.02    0.32
   1 -20  -2    0.27    0.28
  -1 -20   2    0.19    0.39
   1 -20  -2    0.50    0.37
   1 -20  -2    0.05    0.30
   1  20  -2    0.33    0.43
  -1  20   2    0.56    0.36
   1  20  -2   -0.13    0.40
  -1  20   2   -0.31    0.35
   0 -20  -2    0.33    0.29
   0 -20  -2    0.54    0.37
   0 -20   2    0.97    0.39
   0 -20   2   -0.14    0.29
   0 -20  -2    0.43    0.35
   0 -20   2    0.65    0.34
   0  20   2   -0.30    0.39
   0  20   2   -0.10    0.33
   0  20  -2    1.06    0.47
   0  20  -2    0.86    0.45
   1 -20   2    0.05    0.29
  -1 -20  -2    0.12    0.32
  -1 -20  -2   -0.28    0.31
   1 -20   2    0.78    0.37
  -1 -20  -2    0.15    0.28
   1 -20   2   -0.06    0.33
  -1  20  -2    0.06    0.34
  -1  20  -2    0.34    0.38
   1  20   2    0.27    0.42
   1  20   2    0.63    0.37
   2 -20   2    0.21    0.30
   2 -20   2   -0.02    0.33
   2 -20   2   -0.22    0.36
  -2 -20  -2   -0.24    0.31
  -2 -20  -2    0.18    0.32
  -2 -20  -2   -0.12    0.34
   2  20   2    0.12    0.42
  -2  20  -2    0.08    0.32
  -2  20  -2    0.33    0.42
  -3 -20  -2    0.15    0.33
  -3 -20  -2    0.37    0.34
   3 -20   2    0.75    0.39
   3 -20   2   -0.02    0.30
  -3 -20  -2    0.29    0.39
   3 -20   2    0.07    0.30
  -3  20  -2    0.02    0.46
   3  20   2    0.32    0.41
  -3  20  -2   -0.18    0.32
   3  20   2    0.36    0.43
  -4 -20  -2    0.38    0.35
  -4 -20  -2    0.39    0.37
  -4 -20  -2    1.11    0.40
   4 -20   2    0.71    0.35
   4 -20   2    0.25    0.43
   4 -20   2    0.33    0.38
  -4  20  -2    0.47    0.51
  -4  20  -2   -0.12    0.38
   4  20   2   -0.23    0.41
   4  20   2    0.61    0.43
   5 -20   2   -0.18    0.43
   5  20   2    0.03    0.46
  -5  20  -2   -0.32    0.34
   5  20   2   -0.07    0.38
  -5  20  -2    0.58    0.50
   4 -21  -2    0.23    0.33
   4 -21  -2   -0.26    0.33
  -4  21   2    0.17    0.54
   4  21  -2    0.48    0.48
   4  21  -2    0.45    0.47
  -4  21   2   -0.29    0.45
  -3 -21   2    1.92    0.51
   3 -21  -2    2.90    0.50
  -3 -21   2    3.22    0.63
   3 -21  -2    2.07    0.51
   3 -21  -2    2.23    0.48
  -3 -21   2    2.22    0.57
  -3  21   2    3.24    0.66
  -3  21   2    1.90    0.59
   3  21  -2    1.30    0.58
  -2 -21   2   -0.57    0.33
   2 -21  -2   -0.16    0.29
  -2 -21   2    0.00    0.35
   2 -21  -2   -0.58    0.29
   2 -21  -2   -0.02    0.32
  -2 -21   2   -0.24    0.28
  -2  21   2    0.56    0.43
  -2  21   2   -0.21    0.33
   2  21  -2    0.17    0.49
   2  21  -2   -0.43    0.31
  -1 -21   2    2.44    0.52
   1 -21  -2    1.61    0.43
   1 -21  -2    3.07    0.51
  -1 -21   2    1.70    0.48
   1 -21  -2    2.07    0.55
  -1 -21   2    2.15    0.56
  -1  21   2    2.26    0.55
   1  21  -2    1.07    0.50
   1  21  -2    2.05    0.57
  -1  21   2    2.88    0.62
   0 -21  -2    1.22    0.38
   0 -21   2    1.25    0.43
   0 -21   2    0.87    0.37
   0 -21  -2    0.94    0.37
   0 -21   2    1.37    0.48
   0 -21  -2    0.88    0.46
   0  21  -2    1.27    0.50
   0  21  -2    0.62    0.51
   0  21   2    0.50    0.45
   0  21   2    1.05    0.49
   1 -21   2    0.02    0.31
  -1 -21  -2    0.29    0.34
   1 -21   2    0.45    0.42
   1 -21   2    0.56    0.41
  -1 -21  -2    0.39    0.34
  -1 -21  -2    0.31    0.41
  -1  21  -2    0.13    0.42
  -1  21  -2   -0.15    0.46
   1  21   2   -0.31    0.36
  -2 -21  -2    1.19    0.43
  -2 -21  -2    1.67    0.44
   2 -21   2    0.58    0.46
   2 -21   2    1.88    0.50
  -2 -21  -2    1.30    0.52
   2 -21   2    1.18    0.42
  -2  21  -2    1.27    0.52
   2  21   2    2.14    0.58
  -2  21  -2    0.68    0.51
   3 -21   2    0.95    0.38
   3 -21   2    0.26    0.39
   3 -21   2    0.64    0.43
  -3 -21  -2    1.15    0.40
  -3 -21  -2    0.25    0.41
   3  21   2   -0.09    0.44
  -3  21  -2   -0.21    0.33
  -3  21  -2    0.68    0.58
   3  21   2    0.10    0.38
   1 -22  -2    0.63    0.39
   1 -22  -2    1.39    0.53
   1 -22  -2    0.98    0.42
  -1 -22   2    1.08    0.44
  -1 -22   2    0.23    0.47
  -1 -22   2    1.36    0.48
   1  22  -2    1.55    0.56
  -1  22   2    1.01    0.56
  -1  22   2    1.30    0.54
   1  22  -2    0.76    0.48
   0 -22  -2    1.79    0.43
   0 -22   2    1.69    0.44
   0 -22  -2    1.79    0.52
   0 -22  -2    2.26    0.54
   0 -22   2    2.14    0.52
   0 -22   2    0.91    0.50
   0  22  -2    1.31    0.58
   0  22   2    1.33    0.54
   0  22   2    1.39    0.55
   0  22  -2    1.83    0.56
   1 -22   2    2.13    0.58
  -1 -22  -2    1.08    0.40
   1 -22   2    1.07    0.41
   1 -22   2    2.48    0.57
  -1 -22  -2    1.25    0.48
  -1  22  -2    1.08    0.53
   1  22   2    0.85    0.54
  -1  22  -2    2.42    0.69
 -12   0   3    0.41    0.42
 -12   0   3    0.10    0.31
  12   0  -3    0.15    0.44
  12   0  -3   -0.62    0.36
  11   0  -3    0.43    0.38
 -11   0   3   -0.38    0.36
  11   0  -3   -0.02    0.37
 -11   0   3   -0.40    0.24
 -10   0   3   -0.06    0.26
 -10   0   3    0.02    0.26
 -10   0   3   -0.30    0.19
  10   0  -3   -0.45    0.26
  10   0  -3    0.23    0.32
  10   0  -3    0.02    0.26
  -9   0   3    0.19    0.21
   9   0  -3   -0.11    0.24
   9   0  -3   -0.07    0.27
   9   0  -3   -0.11    0.29
  -9   0   3   -0.04    0.22
   9   0  -3    0.03    0.22
  -9   0   3    0.30    0.27
   8   0  -3   -0.17    0.27
   8   0  -3   -0.12    0.19
  -8   0   3   -0.34    0.19
   8   0  -3   -0.12    0.17
  -8   0   3    0.18    0.17
   8   0  -3    0.09    0.22
   7   0  -3    0.29    0.18
   7   0  -3    0.16    0.20
  -7   0   3    0.24    0.20
  -7   0   3   -0.07    0.12
   7   0  -3    0.12    0.27
  -6   0   3   -0.01    0.12
  -6   0   3   -0.14    0.11
   6   0  -3    0.08    0.14
  -6   0   3    0.32    0.19
   6   0  -3   -0.12    0.11
   6   0  -3   -0.06    0.17
   5   0  -3    0.06    0.12
   5   0  -3   -0.02    0.16
  -5   0   3   -0.07    0.14
  -5   0   3    0.04    0.05
   5   0  -3    0.00    0.09
  -5   0   3    0.06    0.11
  -4   0   3    0.02    0.11
   4   0  -3   -0.11    0.16
   4   0  -3    0.06    0.11
  -4   0   3    0.08    0.11
   4   0  -3   -0.08    0.08
  -4   0   3    0.01    0.04
   3   0  -3    0.11    0.09
  -3   0   3   -0.02    0.04
  -3   0   3   -0.01    0.09
   3   0  -3    0.01    0.07
   3   0  -3    0.14    0.14
  -3   0   3    0.07    0.11
   2   0  -3   -0.05    0.06
   2   0  -3    0.03    0.06
   2   0  -3   -0.08    0.06
   2   0  -3    0.00    0.08
   2   0  -3   -0.03    0.13
  -2   0   3    0.08    0.11
  -2   0   3   -0.13    0.06
   1   0  -3    0.04    0.08
   1   0  -3   -0.05    0.05
   1   0  -3    0.14    0.10
   0   0  -3    0.01    0.09
   0   0  -3   -0.01    0.05
   0   0   3    0.01    0.05
   0   0  -3    0.06    0.08
  -1   0  -3   -0.01    0.10
   1   0   3   -0.04    0.07
  -1   0  -3    0.03    0.07
  -1   0  -3   -0.03    0.06
  -1   0  -3    0.08    0.09
  -1   0  -3    0.05    0.09
   1   0   3    0.03    0.06
  -1   0  -3    0.21    0.09
  -2   0  -3   -0.06    0.08
  -2   0  -3    0.03    0.08
   2   0   3    0.17    0.12
   2   0   3    0.10    0.08
  -2   0  -3   -0.08    0.08
  -2   0  -3    0.02    0.12
   2   0   3    0.06    0.07
  -2   0  -3    0.01    0.09
  -3   0  -3    0.04    0.09
   3   0   3    0.18    0.10
  -3   0  -3    0.09    0.11
   3   0   3    0.15    0.15
  -3   0  -3   -0.13    0.12
  -3   0  -3   -0.05    0.10
   3   0   3    0.26    0.12
  -3   0  -3    0.11    0.11
   4   0   3   -0.04    0.10
   4   0   3    0.19    0.11
  -4   0  -3    0.00    0.12
  -4   0  -3    0.04    0.10
  -4   0  -3   -0.04    0.10
   4   0   3    0.01    0.15
  -4   0  -3   -0.09    0.12
  -4   0  -3   -0.01    0.10
   5   0   3    0.13    0.12
  -5   0  -3   -0.16    0.09
  -5   0  -3    0.06    0.16
   5   0   3   -0.36    0.14
   5   0   3    0.08    0.15
  -5   0  -3   -0.23    0.12
  -5   0  -3    0.14    0.11
  -5   0  -3   -0.13    0.11
  -6   0  -3    0.03    0.15
  -6   0  -3   -0.09    0.10
  -6   0  -3    0.14    0.13
   6   0   3    0.03    0.13
  -6   0  -3    0.13    0.16
   6   0   3   -0.06    0.20
   6   0   3    0.00    0.16
  -6   0  -3    0.10    0.20
   7   0   3   -0.05    0.15
   7   0   3   -0.10    0.22
   7   0   3   -0.10    0.19
  -7   0  -3    0.28    0.16
  -7   0  -3   -0.20    0.17
  -7   0  -3    0.06    0.14
  -7   0  -3   -0.12    0.23
  -7   0  -3    0.08    0.19
   8   0   3   -0.11    0.23
  -8   0  -3    0.18    0.24
  -8   0  -3   -0.20    0.23
  -8   0  -3    0.03    0.18
  -8   0  -3   -0.09    0.19
   9   0   3   -0.29    0.31
  -9   0  -3    0.12    0.21
  -9   0  -3    0.15    0.28
  -9   0  -3    0.31    0.25
 -10   0  -3    0.24    0.27
 -10   0  -3   -0.01    0.30
  10   0   3   -0.37    0.33
 -10   0  -3    0.32    0.31
  11   0   3    0.17    0.45
 -11   0  -3   -0.09    0.31
 -11   0  -3   -0.53    0.28
 -11   0  -3    0.43    0.41
  11   0   3    0.44    0.38
  12  -1  -3    3.61    0.64
 -12  -1   3    2.71    0.58
 -12  -1   3    1.99    0.44
  12  -1  -3    1.85    0.53
  12   1  -3    2.66    0.59
 -12   1   3    2.58    0.64
  12   1  -3    1.87    0.59
  11  -1  -3   -0.18    0.34
  11  -1  -3    0.09    0.36
 -11  -1   3    0.00    0.28
 -11  -1   3    0.52    0.42
 -11   1   3    0.29    0.37
 -11   1   3    0.12    0.28
  11   1  -3   -0.47    0.33
  11   1  -3    0.24    0.34
 -10  -1   3    2.23    0.39
  10  -1  -3    2.60    0.44
  10  -1  -3    3.34    0.58
 -10  -1   3    2.08    0.46
 -10  -1   3    2.15    0.41
  10  -1  -3    2.44    0.46
 -10   1   3    2.79    0.38
  10   1  -3    2.21    0.51
 -10   1   3    2.20    0.41
  10   1  -3    1.52    0.47
  10   1  -3    1.77    0.43
  10   1  -3    3.68    0.53
 -10   1   3    2.76    0.49
   9  -1  -3   -0.27    0.21
   9  -1  -3    0.06    0.25
  -9  -1   3    0.04    0.20
  -9  -1   3    0.06    0.25
   9  -1  -3    0.04    0.27
   9   1  -3   -0.30    0.24
  -9   1   3    0.27    0.30
   9   1  -3    0.05    0.22
   9   1  -3   -0.33    0.25
  -9   1   3   -0.50    0.15
   9   1  -3    0.08    0.25
  -9   1   3   -0.23    0.22
  -8  -1   3   27.48    0.96
   8  -1  -3   25.68    1.04
   8  -1  -3   25.12    1.02
   8  -1  -3   26.10    1.19
   8  -1  -3   26.28    1.11
  -8  -1   3   26.56    1.11
   8   1  -3   28.11    1.05
  -8   1   3   24.95    1.10
  -8   1   3   25.40    0.91
   8   1  -3   26.63    1.23
   8   1  -3   25.84    1.09
   7  -1  -3   36.31    1.16
   7  -1  -3   32.95    1.21
  -7  -1   3   35.62    1.10
   7  -1  -3   34.57    1.18
   7  -1  -3   35.26    1.35
  -7  -1   3   36.10    1.25
  -7  -1   3   33.89    1.12
   7   1  -3   33.28    1.34
   7   1  -3   35.74    1.16
  -7   1   3   32.78    1.22
  -7   1   3   33.50    1.05
   7   1  -3   33.90    1.21
   6  -1  -3    0.13    0.17
   6  -1  -3    0.08    0.14
   6  -1  -3   -0.06    0.18
  -6  -1   3    0.20    0.16
  -6  -1   3    0.15    0.16
  -6  -1   3   -0.08    0.08
  -6  -1   3    0.11    0.12
   6  -1  -3   -0.01    0.11
  -6   1   3    0.00    0.14
  -6   1   3    0.11    0.16
   6   1  -3    0.07    0.13
  -6   1   3    0.06    0.10
   6   1  -3    0.16    0.15
   6   1  -3    0.05    0.21
   5  -1  -3    3.47    0.27
   5  -1  -3    3.51    0.29
  -5  -1   3    3.42    0.17
  -5  -1   3    3.96    0.30
   5  -1  -3    4.17    0.33
   5  -1  -3    3.65    0.41
  -5  -1   3    3.33    0.34
   5   1  -3    3.22    0.27
  -5   1   3    3.60    0.37
   5   1  -3    3.06    0.39
  -5   1   3    3.62    0.27
   5   1  -3    3.61    0.34
   4  -1  -3   12.01    0.46
  -4  -1   3   13.48    0.49
  -4  -1   3   13.13    0.37
  -4  -1   3   12.83    0.55
   4  -1  -3   13.35    0.52
   4  -1  -3   12.51    0.61
   4  -1  -3   12.53    0.49
   4   1  -3   12.83    0.48
  -4   1   3   12.98    0.46
   4   1  -3   13.74    0.51
  -4   1   3   12.79    0.56
   4   1  -3   13.59    0.63
   3  -1  -3   45.10    1.30
   3  -1  -3   45.61    1.13
  -3  -1   3   47.38    1.24
  -3  -1   3   46.92    1.06
   3  -1  -3   47.78    1.19
   3  -1  -3   47.56    1.17
  -3  -1   3   46.52    1.16
   3  -1  -3   44.79    1.13
  -3   1   3   45.49    1.26
   3   1  -3   45.32    1.15
   3   1  -3   46.89    1.15
   3   1  -3   45.79    1.31
   2  -1  -3    0.27    0.08
   2  -1  -3    0.20    0.13
   2  -1  -3    0.01    0.06
  -2  -1   3    0.07    0.06
   2  -1  -3    0.15    0.09
   2  -1  -3    0.13    0.08
  -2  -1   3    0.14    0.08
   2   1  -3    0.10    0.07
  -2   1   3    0.31    0.13
   2   1  -3    0.23    0.09
   2   1  -3    0.33    0.14
  -1  -1   3   17.88    0.48
   1  -1  -3   18.45    0.43
   1  -1  -3   18.25    0.54
   1  -1  -3   17.69    0.43
   1  -1  -3   18.76    0.46
   1   1  -3   17.83    0.49
   1   1  -3   17.95    0.53
   1   1  -3   18.08    0.56
   1   1  -3   17.32    0.50
   1   1  -3   19.10    0.54
   0  -1  -3   72.62    1.59
   0  -1  -3   75.46    1.59
   0  -1  -3   74.16    1.79
   0  -1   3   74.78    1.67
   0  -1  -3   73.79    1.69
   0  -1  -3   71.24    1.74
   0  -1   3   76.75    1.65
   0   1  -3   72.85    1.70
   0   1  -3   75.48    1.79
   0   1  -3   73.62    1.65
   0   1  -3   73.91    1.66
   0   1  -3   74.66    1.71
   0   1   3   76.50    1.68
   0   1  -3   74.25    1.67
  -1  -1  -3   42.47    1.09
  -1  -1  -3   42.37    1.06
  -1  -1  -3   42.06    1.10
  -1  -1  -3   42.61    0.98
  -1  -1  -3   41.25    0.98
   1  -1   3   42.44    1.05
  -1  -1  -3   42.99    1.06
  -1   1  -3   41.78    1.02
   1   1   3   42.35    0.97
  -1   1  -3   41.90    1.09
  -1   1  -3   41.49    1.06
  -1   1  -3   41.92    1.04
  -1   1  -3   41.59    1.09
   1   1   3   42.20    1.06
  -2  -1  -3    2.48    0.19
  -2  -1  -3    2.70    0.20
   2  -1   3    2.33    0.19
  -2  -1  -3    2.30    0.18
   2  -1   3    2.85    0.26
  -2  -1  -3    2.57    0.16
  -2  -1  -3    2.86    0.24
  -2  -1  -3    2.61    0.22
  -2   1  -3    2.67    0.20
   2   1   3    2.14    0.17
   2   1   3    2.54    0.17
  -2   1  -3    2.42    0.19
  -2   1  -3    2.44    0.20
  -2   1  -3    2.05    0.24
  -2   1  -3    2.19    0.21
   2   1   3    2.37    0.24
  -3  -1  -3  173.71    3.96
   3  -1   3  166.80    4.04
  -3  -1  -3  174.63    3.96
  -3  -1  -3  179.08    4.04
  -3  -1  -3  181.78    3.74
  -3  -1  -3  177.80    3.90
   3  -1   3  179.77    3.93
  -3  -1  -3  176.86    3.92
   3   1   3  179.82    4.06
  -3   1  -3  178.10    3.98
  -3   1  -3  176.51    4.05
  -3   1  -3  179.52    3.83
  -3   1  -3  172.77    3.93
   3   1   3  172.19    3.89
   3   1   3  175.30    3.96
  -4  -1  -3    0.22    0.12
  -4  -1  -3    0.32    0.16
  -4  -1  -3    0.38    0.10
   4  -1   3    0.25    0.17
   4  -1   3    0.21    0.12
  -4  -1  -3    0.20    0.14
  -4  -1  -3    0.23    0.13
   4   1   3    0.13    0.16
   4   1   3    0.29    0.12
  -4   1  -3    0.40    0.12
  -4   1  -3    0.31    0.14
  -4   1  -3    0.23    0.16
  -4   1  -3    0.22    0.13
  -4   1  -3    0.66    0.14
   4   1   3    0.31    0.15
  -5  -1  -3    0.46    0.17
  -5  -1  -3    0.31    0.16
  -5  -1  -3    0.68    0.23
   5  -1   3    0.43    0.21
  -5  -1  -3    0.30    0.13
  -5  -1  -3    0.56    0.12
   5  -1   3    0.55    0.16
  -5   1  -3    0.45    0.21
   5   1   3    0.18    0.17
  -5   1  -3    0.58    0.16
   5   1   3    0.33    0.13
  -5   1  -3    0.31    0.16
  -5   1  -3    0.50    0.14
  -5   1  -3    0.35    0.16
   5   1   3    0.17    0.19
  -6  -1  -3    2.70    0.39
  -6  -1  -3    3.08    0.36
   6  -1   3    2.52    0.40
   6  -1   3    3.13    0.34
  -6  -1  -3    3.21    0.27
  -6  -1  -3    3.12    0.34
  -6  -1  -3    3.15    0.36
  -6   1  -3    2.91    0.41
  -6   1  -3    3.53    0.38
  -6   1  -3    3.08    0.32
   6   1   3    3.76    0.36
   6   1   3    4.56    0.44
   6   1   3    3.73    0.46
  -6   1  -3    3.54    0.33
  -6   1  -3    2.71    0.34
  -7  -1  -3   -0.05    0.14
  -7  -1  -3    0.27    0.21
  -7  -1  -3   -0.17    0.18
   7  -1   3    0.19    0.19
  -7  -1  -3    0.25    0.14
  -7  -1  -3    0.06    0.24
   7  -1   3    0.05    0.24
  -7   1  -3    0.11    0.19
   7   1   3    0.08    0.25
  -7   1  -3    0.25    0.16
  -7   1  -3   -0.05    0.16
  -7   1  -3    0.25    0.19
  -7   1  -3    0.03    0.21
   7   1   3    0.16    0.23
  -8  -1  -3    1.21    0.34
   8  -1   3    0.92    0.35
  -8  -1  -3    0.86    0.26
  -8  -1  -3    0.55    0.26
  -8  -1  -3    0.62    0.23
  -8   1  -3    0.47    0.30
   8   1   3    0.59    0.29
  -8   1  -3    0.54    0.21
  -8   1  -3    0.32    0.25
   8   1   3    0.27    0.32
  -8   1  -3    0.27    0.23
  -8   1  -3    0.63    0.22
   9  -1   3    0.00    0.30
  -9  -1  -3    0.28    0.24
  -9  -1  -3   -0.01    0.30
  -9  -1  -3    0.29    0.28
  -9   1  -3    0.42    0.31
  -9   1  -3    0.63    0.25
  -9   1  -3    0.33    0.36
   9   1   3    0.75    0.33
   9   1   3   -0.02    0.29
  10  -1   3   18.07    1.16
 -10  -1  -3   19.39    0.95
  10  -1   3   20.08    1.14
 -10  -1  -3   21.07    1.11
 -10  -1  -3   21.38    1.21
 -10   1  -3   21.80    1.21
 -10   1  -3   19.58    1.06
 -10   1  -3   19.46    0.93
  10   1   3   18.47    1.20
  11  -1   3   -0.12    0.40
 -11  -1  -3   -0.07    0.35
 -11  -1  -3   -0.15    0.32
  11  -1   3    0.01    0.42
 -11  -1  -3    0.06    0.37
 -11   1  -3   -0.03    0.28
 -11   1  -3   -0.07    0.41
  11   1   3   -0.12    0.35
 -11   1  -3   -0.22    0.36
 -12  -2   3    0.04    0.33
  12  -2  -3   -0.20    0.42
  12  -2  -3    0.50    0.50
 -12  -2   3    0.22    0.44
 -12   2   3   -0.08    0.44
  12   2  -3    0.05    0.40
  12   2  -3   -0.57    0.36
  11  -2  -3    3.60    0.61
  11  -2  -3    5.50    0.73
  11  -2  -3    4.44    0.65
 -11  -2   3    4.07    0.55
 -11  -2   3    4.61    0.67
 -11   2   3    4.78    0.51
  11   2  -3    2.91    0.59
  11   2  -3    4.88    0.76
  11   2  -3    3.85    0.59
 -11   2   3    3.34    0.62
 -11   2   3    3.92    0.58
  10  -2  -3    7.02    0.71
  10  -2  -3    8.44    0.69
  10  -2  -3    6.39    0.75
 -10  -2   3    7.14    0.57
 -10  -2   3    7.27    0.78
  10   2  -3    6.34    0.81
  10   2  -3    9.18    0.75
 -10   2   3    7.69    0.53
 -10   2   3    7.69    0.80
 -10   2   3    6.69    0.66
   9  -2  -3    0.75    0.32
   9  -2  -3   -0.05    0.23
   9  -2  -3    0.78    0.29
  -9  -2   3    0.56    0.26
  -9  -2   3    0.56    0.30
   9   2  -3    0.18    0.32
  -9   2   3    0.77    0.32
   9   2  -3    0.38    0.29
  -9   2   3    0.33    0.21
   9   2  -3    0.23    0.31
  -9   2   3    0.21    0.23
   8  -2  -3   13.83    0.75
   8  -2  -3   13.15    0.70
   8  -2  -3   12.91    0.78
  -8  -2   3   13.80    0.67
  -8  -2   3   13.75    0.77
   8   2  -3   12.62    0.84
  -8   2   3   14.45    0.80
  -8   2   3   12.51    0.61
   8   2  -3   14.41    0.79
  -8   2   3   13.91    0.71
   8   2  -3   14.05    0.73
   7  -2  -3    9.16    0.56
   7  -2  -3    8.95    0.59
  -7  -2   3    7.74    0.46
  -7  -2   3   10.09    0.59
  -7  -2   3    8.18    0.53
   7  -2  -3    8.50    0.52
  -7  -2   3    8.51    0.36
   7   2  -3    9.48    0.60
   7   2  -3    8.84    0.53
   7   2  -3   10.33    0.72
  -7   2   3    8.89    0.45
  -7   2   3    9.85    0.62
  -6  -2   3   -0.09    0.14
   6  -2  -3   -0.03    0.15
   6  -2  -3    0.33    0.20
  -6  -2   3    0.28    0.19
  -6  -2   3    0.09    0.13
  -6  -2   3    0.09    0.09
   6  -2  -3   -0.02    0.11
   6   2  -3    0.45    0.19
  -6   2   3    0.10    0.17
   6   2  -3    0.15    0.24
  -6   2   3    0.07    0.15
  -6   2   3    0.16    0.12
   6   2  -3    0.28    0.14
   5  -2  -3    2.66    0.27
  -5  -2   3    2.66    0.31
   5  -2  -3    2.90    0.32
   5  -2  -3    2.63    0.29
  -5  -2   3    2.90    0.28
  -5  -2   3    2.59    0.17
  -5   2   3    3.05    0.25
   5   2  -3    2.70    0.37
   5   2  -3    2.47    0.26
   5   2  -3    2.51    0.28
  -5   2   3    3.11    0.35
  -4  -2   3  171.94    3.97
   4  -2  -3  178.06    3.97
   4  -2  -3  169.76    3.85
   4  -2  -3  171.68    3.98
  -4  -2   3  175.25    3.77
  -4  -2   3  174.40    3.90
   4   2  -3  173.73    3.91
   4   2  -3  170.23    4.13
  -4   2   3  175.59    4.03
   4   2  -3  171.80    3.89
   3  -2  -3   -0.01    0.10
   3  -2  -3    0.07    0.07
  -3  -2   3    0.05    0.06
  -3  -2   3    0.11    0.10
   3  -2  -3    0.01    0.09
  -3  -2   3    0.05    0.10
   3   2  -3   -0.09    0.08
   3   2  -3   -0.22    0.12
   3   2  -3   -0.05    0.08
  -3   2   3    0.06    0.12
   2  -2  -3    3.64    0.16
  -2  -2   3    3.60    0.18
  -2  -2   3    3.49    0.21
   2  -2  -3    3.79    0.21
   2  -2  -3    3.60    0.16
   2  -2  -3    3.48    0.14
   2   2  -3    3.31    0.20
   2   2  -3    3.62    0.25
  -2   2   3    3.68    0.26
   2   2  -3    3.49    0.17
   2   2  -3    3.86    0.29
   2   2  -3    3.29    0.20
  -1  -2   3  346.22    7.18
   1  -2  -3  335.40    7.24
   1  -2  -3  338.67    7.25
  -1  -2   3  340.37    7.23
   1  -2  -3  339.36    7.63
   1  -2  -3  335.45    7.40
   1   2  -3  337.35    7.15
   1   2  -3  344.63    7.40
   1   2  -3  333.87    7.22
   1   2  -3  339.95    7.38
   0  -2  -3  401.10    9.05
   0  -2   3  407.54    8.70
   0  -2   3  405.35    8.59
   0  -2   3  403.09    8.57
   0  -2  -3  399.04    8.63
   0  -2  -3  399.02    8.76
   0  -2  -3  393.87    8.61
   0   2  -3  405.71    8.68
   0   2  -3  406.70    8.56
   0   2  -3  405.28    8.45
   0   2  -3  410.25    8.59
   1  -2   3    0.77    0.12
  -1  -2  -3    0.91    0.15
   1  -2   3    1.31    0.15
  -1  -2  -3    0.99    0.14
  -1  -2  -3    1.14    0.10
  -1  -2  -3    0.87    0.13
  -1  -2  -3    1.03    0.09
  -1  -2  -3    0.81    0.15
   1  -2   3    0.85    0.14
  -1   2  -3    1.02    0.14
   1   2   3    0.94    0.15
  -1   2  -3    1.01    0.14
  -1   2  -3    1.04    0.16
   1   2   3    0.98    0.11
  -1   2  -3    1.04    0.14
  -1   2  -3    0.96    0.16
  -2  -2  -3    0.97    0.16
  -2  -2  -3    0.89    0.16
   2  -2   3    0.75    0.13
  -2  -2  -3    0.72    0.12
  -2  -2  -3    0.93    0.08
  -2  -2  -3    0.93    0.15
   2  -2   3    0.65    0.16
  -2  -2  -3    0.70    0.13
  -2   2  -3    0.68    0.15
  -2   2  -3    0.78    0.14
  -2   2  -3    0.77    0.14
  -2   2  -3    0.74    0.17
   2   2   3    0.93    0.17
   2   2   3    0.98    0.14
  -2   2  -3    0.94    0.14
  -3  -2  -3  144.98    3.28
  -3  -2  -3  142.31    3.26
  -3  -2  -3  142.80    3.23
  -3  -2  -3  142.28    3.32
  -3  -2  -3  142.13    3.22
  -3  -2  -3  140.77    3.00
   3  -2   3  142.59    3.36
   3  -2   3  143.23    3.24
  -3   2  -3  142.36    3.25
  -3   2  -3  141.16    3.35
   3   2   3  142.91    3.18
   3   2   3  143.19    3.29
  -3   2  -3  142.26    3.19
  -3   2  -3  144.35    3.37
   3   2   3  146.67    3.37
  -3   2  -3  140.88    3.28
  -4  -2  -3   13.69    0.55
   4  -2   3   15.08    0.66
  -4  -2  -3   14.70    0.56
  -4  -2  -3   14.37    0.41
   4  -2   3   14.21    0.56
  -4  -2  -3   14.42    0.57
  -4  -2  -3   14.32    0.56
  -4  -2  -3   14.33    0.63
   4   2   3   14.89    0.59
   4   2   3   14.48    0.65
  -4   2  -3   14.52    0.60
  -4   2  -3   14.50    0.58
  -4   2  -3   14.38    0.64
  -4   2  -3   14.33    0.55
   4   2   3   14.77    0.53
  -5  -2  -3    1.17    0.20
  -5  -2  -3    1.33    0.14
  -5  -2  -3    1.18    0.22
  -5  -2  -3    1.46    0.26
  -5  -2  -3    1.16    0.23
   5  -2   3    0.93    0.26
  -5  -2  -3    1.29    0.21
   5  -2   3    1.71    0.25
   5   2   3    1.39    0.26
  -5   2  -3    1.47    0.24
   5   2   3    1.36    0.20
  -5   2  -3    1.47    0.24
  -5   2  -3    1.18    0.21
  -5   2  -3    1.07    0.25
  -5   2  -3    1.30    0.20
   5   2   3    1.69    0.30
  -6  -2  -3   -0.08    0.12
   6  -2   3   -0.05    0.14
  -6  -2  -3   -0.04    0.15
  -6  -2  -3    0.14    0.17
   6  -2   3   -0.27    0.17
  -6  -2  -3    0.39    0.18
  -6  -2  -3   -0.06    0.10
  -6   2  -3   -0.06    0.14
  -6   2  -3   -0.04    0.18
  -6   2  -3    0.06    0.15
  -6   2  -3    0.22    0.16
   6   2   3   -0.17    0.19
  -6   2  -3   -0.06    0.12
   6   2   3    0.15    0.20
   6   2   3    0.08    0.15
  -7  -2  -3    4.21    0.44
  -7  -2  -3    4.54    0.47
  -7  -2  -3    4.44    0.44
   7  -2   3    3.89    0.52
  -7  -2  -3    3.99    0.49
   7  -2   3    2.93    0.39
  -7   2  -3    3.99    0.51
  -7   2  -3    5.25    0.38
  -7   2  -3    3.73    0.44
   7   2   3    5.08    0.54
  -7   2  -3    4.35    0.44
  -7   2  -3    3.78    0.43
   7   2   3    3.42    0.49
  -8  -2  -3    3.92    0.44
  -8  -2  -3    4.26    0.56
   8  -2   3    2.93    0.48
  -8  -2  -3    4.68    0.52
   8  -2   3    3.83    0.55
  -8  -2  -3    3.59    0.45
  -8   2  -3    5.30    0.48
  -8   2  -3    4.02    0.42
  -8   2  -3    3.43    0.46
   8   2   3    4.01    0.51
  -8   2  -3    3.88    0.49
   8   2   3    3.98    0.57
  -8   2  -3    3.88    0.55
  -9  -2  -3    1.36    0.44
  -9  -2  -3    1.66    0.38
   9  -2   3    1.44    0.39
  -9  -2  -3    2.12    0.37
   9  -2   3    0.92    0.42
  -9  -2  -3    1.19    0.38
  -9   2  -3    0.98    0.33
   9   2   3    1.59    0.39
  -9   2  -3    1.43    0.43
   9   2   3    0.69    0.39
  -9   2  -3    1.39    0.31
  10  -2   3   -0.44    0.30
 -10  -2  -3    0.05    0.36
 -10  -2  -3    0.57    0.35
 -10  -2  -3    0.68    0.30
  10  -2   3    0.23    0.34
 -10   2  -3    0.29    0.37
  10   2   3   -0.07    0.35
  10   2   3    0.45    0.36
 -10   2  -3    0.53    0.33
 -10   2  -3    0.19    0.26
  11  -2   3    0.90    0.50
 -11  -2  -3    0.37    0.41
 -11  -2  -3    0.80    0.41
 -11  -2  -3    1.17    0.39
  11  -2   3    0.40    0.46
  11   2   3    0.31    0.42
 -11   2  -3    1.00    0.42
 -11   2  -3    0.57    0.43
  12  -3  -3   -0.27    0.43
 -12  -3   3    0.35    0.39
 -12  -3   3   -0.11    0.32
  12  -3  -3    0.51    0.47
  12   3  -3    0.18    0.41
  12   3  -3    0.14    0.42
  12   3  -3   -0.17    0.39
 -12   3   3   -0.02    0.46
 -11  -3   3    4.46    0.55
 -11  -3   3    4.56    0.68
  11  -3  -3    4.50    0.65
  11  -3  -3    5.17    0.62
  11  -3  -3    4.58    0.69
  11   3  -3    5.21    0.66
 -11   3   3    4.56    0.69
 -11   3   3    3.85    0.59
  11   3  -3    4.05    0.62
  11   3  -3    5.64    0.81
 -10  -3   3   -0.17    0.22
  10  -3  -3   -0.12    0.31
 -10  -3   3   -0.09    0.27
  10  -3  -3    0.22    0.27
  10  -3  -3   -0.20    0.36
  10   3  -3    0.53    0.38
 -10   3   3   -0.02    0.21
 -10   3   3    0.07    0.26
 -10   3   3    0.20    0.29
  10   3  -3    0.25    0.38
  -9  -3   3    1.46    0.32
  -9  -3   3    2.13    0.43
   9  -3  -3    1.67    0.35
   9  -3  -3    1.57    0.38
   9  -3  -3    1.47    0.40
  -9   3   3    2.26    0.43
   9   3  -3    1.44    0.35
   9   3  -3    1.51    0.41
  -9   3   3    1.50    0.28
   9   3  -3    1.44    0.45
  -9   3   3    2.14    0.46
   8  -3  -3    0.68    0.28
   8  -3  -3    0.41    0.26
   8  -3  -3   -0.04    0.20
  -8  -3   3    0.24    0.22
  -8  -3   3    0.12    0.17
  -8   3   3    0.30    0.28
   8   3  -3    0.30    0.24
  -8   3   3    0.26    0.16
  -8   3   3    0.07    0.22
   8   3  -3    0.37    0.36
   8   3  -3    0.02    0.20
   7  -3  -3    0.34    0.20
   7  -3  -3   -0.22    0.14
  -7  -3   3    0.18    0.12
  -7  -3   3    0.26    0.18
   7  -3  -3   -0.21    0.21
  -7  -3   3    0.19    0.16
  -7  -3   3   -0.08    0.20
  -7   3   3   -0.17    0.17
   7   3  -3    0.17    0.29
   7   3  -3    0.03    0.22
   7   3  -3   -0.10    0.15
  -7   3   3    0.10    0.13
  -6  -3   3    0.22    0.11
  -6  -3   3    0.25    0.19
   6  -3  -3    0.15    0.14
  -6  -3   3    0.25    0.15
  -6  -3   3   -0.11    0.15
   6  -3  -3    0.44    0.21
   6  -3  -3    0.45    0.18
   6   3  -3    0.61    0.21
   6   3  -3    0.45    0.17
   6   3  -3    0.43    0.25
  -6   3   3    0.09    0.14
  -6   3   3    0.29    0.20
  -6   3   3    0.25    0.12
  -5  -3   3    0.06    0.08
  -5  -3   3    0.14    0.14
  -5  -3   3    0.01    0.14
   5  -3  -3   -0.13    0.12
   5  -3  -3    0.05    0.10
   5  -3  -3    0.11    0.15
  -5   3   3    0.11    0.17
   5   3  -3    0.10    0.15
   5   3  -3   -0.01    0.17
   5   3  -3    0.16    0.11
  -4  -3   3   17.22    0.61
   4  -3  -3   16.73    0.56
   4  -3  -3   17.30    0.63
  -4  -3   3   17.28    0.52
   4  -3  -3   16.00    0.63
   4  -3  -3   17.26    0.61
  -4  -3   3   18.20    0.64
  -4   3   3   16.87    0.68
   4   3  -3   17.45    0.60
   4   3  -3   16.14    0.72
   4   3  -3   17.71    0.61
   3  -3  -3   72.52    1.83
   3  -3  -3   72.24    1.71
   3  -3  -3   74.03    1.61
  -3  -3   3   76.37    1.73
  -3  -3   3   73.72    1.81
  -3  -3   3   74.09    1.79
   3  -3  -3   73.68    1.82
   3   3  -3   77.77    1.97
  -3   3   3   74.49    1.88
   3   3  -3   74.03    1.78
   3   3  -3   75.98    1.76
   2  -3  -3    2.83    0.13
   2  -3  -3    2.96    0.14
  -2  -3   3    2.90    0.19
  -2  -3   3    3.02    0.22
   2  -3  -3    2.50    0.20
   2  -3  -3    2.76    0.14
   2   3  -3    2.78    0.17
   2   3  -3    3.05    0.27
   2   3  -3    2.57    0.19
   2   3  -3    3.21    0.29
  -2   3   3    2.75    0.25
   2   3  -3    3.22    0.19
   1  -3  -3  233.32    5.05
   1  -3  -3  239.12    5.18
  -1  -3   3  236.61    5.08
   1  -3  -3  235.19    5.32
  -1  -3   3  240.54    5.02
   1  -3  -3  234.94    5.09
   1   3  -3  223.61    5.05
   1   3  -3  231.97    5.14
   1   3  -3  236.47    5.05
   1   3  -3  230.85    5.19
   0  -3   3  222.33    4.87
   0  -3  -3  226.16    5.13
   0  -3  -3  223.94    4.89
   0  -3  -3  226.13    4.96
   0  -3  -3  225.74    4.90
   0  -3   3  228.44    4.87
   0  -3   3  227.85    4.93
   0   3  -3  230.05    4.94
   0   3  -3  218.16    4.86
   0   3  -3  218.49    4.85
   0   3  -3  223.50    4.84
  -1  -3  -3   26.79    0.75
   1  -3   3   26.97    0.77
  -1  -3  -3   27.11    0.79
  -1  -3  -3   27.21    0.65
  -1  -3  -3   25.94    0.65
  -1  -3  -3   27.32    0.74
   1  -3   3   26.94    0.75
  -1   3  -3   27.31    0.75
   1   3   3   28.45    0.80
  -1   3  -3   27.62    0.75
   1   3   3   27.15    0.74
  -1   3  -3   27.27    0.79
  -1   3  -3   26.70    0.75
  -1   3  -3   27.51    0.80
  -1   3  -3   28.36    0.72
  -2  -3  -3    0.11    0.08
  -2  -3  -3    0.07    0.11
   2  -3   3    0.07    0.10
  -2  -3  -3    0.10    0.09
  -2  -3  -3    0.01    0.10
   2  -3   3    0.08    0.14
  -2  -3  -3    0.24    0.10
   2  -3   3    0.10    0.11
  -2   3  -3   -0.09    0.12
   2   3   3    0.07    0.12
  -2   3  -3    0.08    0.08
  -2   3  -3    0.06    0.10
   2   3   3    0.21    0.11
  -2   3  -3    0.10    0.12
  -2   3  -3    0.95    0.14
   3  -3   3   29.80    0.89
   3  -3   3   30.63    0.98
   3  -3   3   30.64    0.95
  -3  -3  -3   29.60    0.92
  -3  -3  -3   29.46    0.88
  -3  -3  -3   29.64    0.88
  -3  -3  -3   30.90    0.86
  -3  -3  -3   29.29    0.89
  -3   3  -3   30.42    0.91
   3   3   3   30.14    0.90
  -3   3  -3   32.02    0.98
  -3   3  -3   30.59    0.86
  -3   3  -3   29.83    0.89
  -3   3  -3   31.08    0.91
   3   3   3   31.85    0.99
   4  -3   3   35.78    1.06
  -4  -3  -3   36.16    1.04
  -4  -3  -3   36.77    1.12
  -4  -3  -3   34.66    1.03
  -4  -3  -3   36.04    1.05
   4  -3   3   36.97    1.14
   4  -3   3   36.02    1.16
  -4  -3  -3   34.14    1.03
   4   3   3   33.67    1.14
   4   3   3   36.58    1.10
  -4   3  -3   34.70    1.05
  -4   3  -3   37.19    1.16
  -4   3  -3   36.52    1.02
  -4   3  -3   35.43    1.06
   4   3   3   36.18    0.99
  -4   3  -3   34.33    1.07
  -5  -3  -3    0.04    0.14
   5  -3   3   -0.01    0.12
  -5  -3  -3    0.08    0.14
   5  -3   3    0.21    0.19
  -5  -3  -3    0.17    0.15
  -5  -3  -3    0.40    0.15
  -5  -3  -3    0.19    0.06
   5  -3   3    0.30    0.19
  -5  -3  -3    0.18    0.17
   5   3   3    0.02    0.17
   5   3   3    0.04    0.12
  -5   3  -3    0.15    0.15
  -5   3  -3    0.24    0.15
  -5   3  -3    0.09    0.15
  -5   3  -3    0.02    0.15
   5   3   3    0.19    0.18
  -6  -3  -3    5.78    0.25
   6  -3   3    5.80    0.43
  -6  -3  -3    6.97    0.48
  -6  -3  -3    6.09    0.42
  -6  -3  -3    6.07    0.41
   6  -3   3    4.85    0.53
  -6  -3  -3    5.47    0.46
   6  -3   3    6.14    0.49
  -6  -3  -3    5.41    0.40
   6   3   3    6.33    0.60
  -6   3  -3    6.70    0.38
  -6   3  -3    5.78    0.56
   6   3   3    6.51    0.48
  -6   3  -3    6.79    0.47
   6   3   3    6.27    0.41
  -6   3  -3    6.70    0.45
   7  -3   3    7.32    0.58
  -7  -3  -3    8.59    0.56
   7  -3   3    9.90    0.59
  -7  -3  -3    8.47    0.54
  -7  -3  -3    7.51    0.58
   7  -3   3    7.74    0.74
  -7  -3  -3   10.11    0.59
   7   3   3    8.82    0.66
   7   3   3    8.57    0.62
  -7   3  -3    9.45    0.58
  -7   3  -3    9.87    0.62
  -7   3  -3    7.42    0.62
  -7   3  -3    7.23    0.51
  -7   3  -3    8.66    0.47
  -8  -3  -3    0.11    0.21
  -8  -3  -3   -0.03    0.24
   8  -3   3   -0.29    0.28
  -8  -3  -3    0.27    0.25
   8  -3   3    0.26    0.27
[truncated: 1,148,557 more chars]
